# Supplementary material for: Transcriptome dynamics along axolotl regenerative development are consistent with an extensive reduction in gene expression heterogeneity in dedifferentiated cells
Source: PeerJ. 2017 Nov 6;5:e4004. doi: 10.7717/peerj.4004 (PMC5678507; doi:10.7717/peerj.4004)
Supplement: Dataset S1 [file peerj-05-4004-s008.xlsx]

## Sheet: Dataset S1
Dataset S1. Transcrtip abundance mean and CV for 20,080 probesets in 20 timepoints along axolotl forearm regenerative development.
	Transcript abundance mean per timepoint																				Transcript abundance CV per timepoint
Probeset	T0	T0.5	T1	T1.5	T2	T3	T4	T5	T7	T9	T10	T12	T14	T16	T18	T20	T22	T24	T26	T28	1	2	3	4	5	6	7	8	9	10	11	12	13	14	15	16	17	18	19	20
AFFX-BioB-3_at	9.04454	9.00186	9.00399	8.95652	8.89994	8.91559	8.89206	8.85075	8.91461	8.99667	8.98853	8.92071	8.95751	8.92134	8.84461	9.0521	9.04231	8.99346	8.96758	8.92507	0.0218734	0.0191531	0.0191386	0.0150041	0.0215318	0.0133557	0.0145424	0.0130917	0.0181232	0.0184662	0.0248574	0.0222961	0.0277828	0.0238606	0.0202589	0.0149668	0.0167507	0.0104312	0.0169118	0.0126811
AFFX-BioB-5_at	8.46415	8.46682	8.42891	8.41426	8.37602	8.42338	8.42221	8.35195	8.4356	8.54323	8.58701	8.50404	8.53254	8.44637	8.39505	8.61541	8.62722	8.52726	8.53566	8.48868	0.0242005	0.0266644	0.026454	0.0196639	0.0278092	0.0165664	0.0163561	0.0152698	0.0162002	0.0145167	0.0250647	0.0298409	0.0276888	0.0262061	0.0218446	0.0245607	0.0223624	0.0186879	0.0220356	0.0237249
AFFX-BioB-M_at	9.05273	8.9296	8.88906	8.91336	8.86652	8.93579	8.86527	8.86042	8.90776	8.98749	9.02659	8.9592	9.0025	8.96611	8.84157	9.11238	9.12876	9.01702	9.00923	8.92447	0.0225276	0.0288891	0.028194	0.017966	0.0281429	0.0116647	0.0173026	0.0104383	0.0195118	0.0121022	0.022088	0.0220153	0.0235568	0.0268259	0.0217187	0.0227084	0.0240805	0.0196619	0.0215665	0.0177172
AFFX-BioC-3_at	10.4243	10.3553	10.3139	10.3244	10.2835	10.3679	10.334	10.2844	10.3668	10.3956	10.4682	10.3999	10.4391	10.3863	10.2951	10.4828	10.486	10.4132	10.4167	10.3643	0.0193089	0.0318133	0.0296715	0.021741	0.028206	0.0194043	0.0189376	0.0219535	0.0223515	0.0199686	0.0291096	0.0317115	0.0322405	0.0299265	0.0272211	0.0276285	0.0322131	0.0265248	0.0267985	0.0292489
AFFX-BioC-5_at	9.98998	9.91522	9.87557	9.88693	9.85348	9.92445	9.87253	9.81801	9.88277	9.93866	9.99639	9.93006	9.99179	9.89427	9.8062	10.0311	10.027	9.94765	9.96249	9.92186	0.0150268	0.0253486	0.0244654	0.0115759	0.0212232	0.0123809	0.012609	0.0132346	0.0137397	0.0128664	0.0233094	0.024286	0.0235095	0.0242247	0.0195404	0.0196964	0.0229872	0.0150889	0.0196735	0.018657
AFFX-BioDn-3_at	12.2619	12.2211	12.1534	12.1618	12.1445	12.2194	12.1873	12.1801	12.2641	12.2778	12.3349	12.2697	12.3289	12.2919	12.195	12.3713	12.3665	12.2998	12.3195	12.2538	0.0101126	0.0120635	0.0134216	0.00797308	0.0124472	0.00790496	0.0114747	0.00893058	0.00684728	0.0101094	0.00927628	0.00775741	0.00876541	0.00994498	0.0106813	0.00800319	0.0109028	0.0077516	0.00955093	0.00852323
AFFX-BioDn-5_at	11.2854	11.213	11.1942	11.1748	11.1595	11.2727	11.2022	11.1798	11.2979	11.3045	11.37	11.3178	11.3525	11.3047	11.2151	11.3711	11.3933	11.3106	11.3176	11.2488	0.0103427	0.0135966	0.0122432	0.00773887	0.015066	0.0138652	0.0205839	0.0172078	0.0101152	0.0156055	0.00933612	0.00860993	0.00972416	0.0126634	0.0135878	0.0115818	0.0120222	0.00644224	0.00864466	0.0124246
AFFX-CreX-3_at	13.6536	13.6547	13.6852	13.6438	13.6812	13.7657	13.7429	13.7589	13.8112	13.8277	13.7992	13.7825	13.8303	13.8062	13.7612	13.8434	13.8363	13.8258	13.8426	13.8124	0.00528253	0.00721237	0.00616719	0.00479797	0.00626387	0.00228989	0.00634817	0.00484404	0.00436011	0.00391587	0.00430099	0.00366083	0.00405243	0.00474819	0.00642484	0.00410419	0.00572947	0.00232058	0.00357939	0.00438893
AFFX-CreX-5_at	13.4792	13.4572	13.4502	13.4491	13.4443	13.5414	13.5097	13.519	13.5892	13.5895	13.5886	13.5702	13.6232	13.5917	13.5339	13.6526	13.6447	13.6289	13.6339	13.6145	0.0071359	0.00671476	0.00752451	0.0048495	0.00702027	0.0070823	0.0123231	0.00709745	0.0066926	0.00845312	0.00661657	0.00532526	0.00580654	0.00643433	0.00793338	0.00607234	0.00757117	0.00437387	0.00610504	0.00809816
AFFX-DapX-3_at	10.6455	10.5591	10.7794	10.5713	10.6276	10.9374	10.8832	10.8233	10.9593	11.0129	10.7787	10.8615	11.0994	11.0185	10.6362	10.8314	10.8448	10.8404	10.9719	11.0517	0.0532884	0.0327115	0.0247883	0.0339594	0.0338808	0.041728	0.0347197	0.0359305	0.0330215	0.0180016	0.0239929	0.0185987	0.0363627	0.0288725	0.0194084	0.0303232	0.0349916	0.0440103	0.0256916	0.0450636
AFFX-DapX-5_at	7.83842	7.7017	7.8707	7.82502	7.84775	8.64326	8.50014	8.39923	8.59979	8.56912	8.4589	8.49808	8.76612	8.57704	8.122	8.36524	8.33458	8.20406	8.40247	8.31359	0.0769925	0.0893785	0.0816389	0.0844916	0.0811449	0.0796166	0.0703575	0.0845553	0.0638939	0.0464926	0.0753773	0.0583846	0.0907745	0.0842255	0.0590632	0.0327522	0.0266835	0.0219878	0.0178875	0.0388836
AFFX-DapX-M_at	9.65489	9.57403	9.73938	9.62036	9.70191	10.0887	9.99997	9.93876	10.0545	10.0781	9.95399	10.0325	10.262	10.128	9.69788	9.93376	9.92055	9.8588	9.98824	9.99713	0.0532053	0.0412043	0.0373622	0.0433862	0.0447565	0.0445325	0.036683	0.045076	0.0319644	0.0194516	0.0342937	0.0274971	0.0494963	0.0401649	0.0288023	0.0281704	0.0262379	0.035071	0.0178295	0.0354076
AFFX-LysX-3_at	7.92088	7.86177	8.11521	7.88357	7.96282	8.13973	8.0945	8.05579	8.15791	8.26635	7.97562	8.09615	8.36808	8.23198	7.88523	8.10009	8.05314	8.07769	8.26483	8.35661	0.081094	0.0457034	0.0333633	0.0560853	0.0527045	0.0660525	0.050298	0.0485007	0.0512069	0.0272783	0.0298247	0.0279293	0.050805	0.0437792	0.0264527	0.0453696	0.0483803	0.061855	0.0395064	0.0671499
AFFX-LysX-5_at	6.49529	6.28126	6.67927	6.42163	6.53439	6.68346	6.71199	6.63854	6.7687	6.8718	6.44215	6.53346	6.89972	6.82133	6.42404	6.67957	6.74517	6.73225	6.88687	6.97871	0.0965937	0.0687293	0.0484504	0.0689175	0.0702348	0.106788	0.0852852	0.0745806	0.0815944	0.046952	0.0557436	0.0488582	0.0725376	0.0625407	0.034173	0.04945	0.0625369	0.0862731	0.0444476	0.0885721
AFFX-LysX-M_at	6.5213	6.40635	6.72669	6.47176	6.56837	6.74178	6.69297	6.63739	6.77219	6.86748	6.59662	6.65419	6.90938	6.86635	6.42292	6.71385	6.70584	6.74202	6.86553	6.95002	0.0969048	0.0540624	0.0389352	0.0671794	0.0614912	0.0836526	0.0651892	0.0610323	0.0672114	0.0456061	0.0459267	0.042199	0.0604844	0.0473906	0.0294508	0.0565486	0.0689532	0.079386	0.0443274	0.0866428
AFFX-PheX-3_at	7.95131	7.88113	8.09987	7.9541	7.96067	8.1772	8.11897	8.05676	8.13052	8.22105	7.97034	8.07126	8.28852	8.1654	7.90458	8.05238	8.07355	8.03083	8.18986	8.23357	0.0575959	0.0420175	0.0404044	0.0560216	0.0459958	0.0903555	0.0691552	0.0747561	0.067661	0.0475564	0.0533176	0.0509023	0.0775805	0.0622587	0.0377621	0.0199924	0.0286941	0.0391144	0.0130764	0.0400103
AFFX-PheX-5_at	6.83374	6.74889	7.04839	6.78219	6.8064	7.17327	7.08737	7.06714	7.20265	7.27002	6.9778	7.11226	7.38821	7.20715	6.90679	7.17478	7.15093	7.17637	7.28124	7.40991	0.0755825	0.0639095	0.0706503	0.0935329	0.0810143	0.145384	0.127074	0.119133	0.11873	0.0912986	0.107607	0.0905537	0.118445	0.10864	0.0809063	0.0305113	0.0267338	0.0366517	0.0205689	0.0352662
AFFX-PheX-M_at	6.94867	6.89726	7.21235	7.01274	7.07405	7.27879	7.19054	7.17551	7.31974	7.39673	7.1538	7.26676	7.5067	7.3821	7.04095	7.25943	7.32847	7.28519	7.43949	7.49596	0.0669662	0.0580791	0.0551162	0.0831068	0.0705014	0.108002	0.0942685	0.0903513	0.08832	0.0583653	0.0793171	0.0620889	0.0983877	0.0847635	0.0513645	0.0268659	0.0250392	0.0390384	0.0139743	0.0404752
AFFX-r2-Bs-dap-3_at	10.9754	10.8725	11.082	10.9011	10.9661	11.2603	11.2052	11.1478	11.3047	11.3033	11.1193	11.2249	11.4291	11.316	10.9683	11.173	11.1674	11.1254	11.2647	11.3254	0.0389859	0.030975	0.0232995	0.0326047	0.0325984	0.0359249	0.0302284	0.0317068	0.029042	0.0138081	0.0208907	0.01806	0.0301541	0.0258336	0.0197613	0.0261234	0.0268658	0.0323866	0.0221287	0.0384298
AFFX-r2-Bs-dap-5_at	8.35327	8.12955	8.32824	8.21699	8.34827	9.19661	9.03875	8.91809	9.13305	9.09361	9.0179	9.06701	9.27728	9.12802	8.5979	8.91577	8.87464	8.74854	8.91417	8.73486	0.0805561	0.0920464	0.0834402	0.0911397	0.0832149	0.069738	0.0610412	0.0830844	0.0562628	0.0380678	0.0686678	0.0562161	0.086107	0.075727	0.0538043	0.031495	0.0254768	0.0222599	0.0209454	0.0374248
AFFX-r2-Bs-dap-M_at	10.1667	10.0812	10.2404	10.1306	10.1605	10.5735	10.4883	10.4254	10.5569	10.552	10.3954	10.4967	10.7144	10.5955	10.1668	10.3971	10.3808	10.3118	10.4992	10.4933	0.0496648	0.0371164	0.0328501	0.0406248	0.0439657	0.0382417	0.0311735	0.0393344	0.0300631	0.0183059	0.0327765	0.0245573	0.0416157	0.0358049	0.0229028	0.0283136	0.0265053	0.0301317	0.0210571	0.037446
AFFX-r2-Bs-lys-3_at	7.69675	7.5762	7.88342	7.61165	7.6266	7.76465	7.69796	7.65196	7.81954	7.87077	7.61933	7.66322	7.97591	7.8004	7.49318	7.64437	7.74462	7.69414	7.86782	7.87211	0.0687851	0.0430015	0.037695	0.0527358	0.0508876	0.0799354	0.0673747	0.0617882	0.0597611	0.0297532	0.0421116	0.0361431	0.0565464	0.0521917	0.0304599	0.0441649	0.0462458	0.0713991	0.0320419	0.0642811
AFFX-r2-Bs-lys-5_at	7.06583	6.85067	7.25211	7.02462	7.07387	7.29516	7.2593	7.27344	7.37159	7.44183	7.04217	7.16714	7.47636	7.31776	7.01816	7.292	7.30146	7.3356	7.41621	7.52913	0.090315	0.0707751	0.0517985	0.0595189	0.0641274	0.101971	0.0864149	0.0764434	0.0761483	0.0442829	0.0524146	0.0489135	0.0762158	0.0561201	0.0348239	0.0484511	0.0536787	0.0748134	0.0545479	0.0819847
AFFX-r2-Bs-lys-M_at	6.56811	6.29551	6.69408	6.37606	6.49264	6.76366	6.62211	6.54937	6.79415	6.80339	6.46744	6.59198	6.91844	6.7403	6.30512	6.66969	6.69325	6.67202	6.80313	6.8222	0.0952966	0.0883911	0.0617614	0.0736745	0.0766814	0.087514	0.0744483	0.0638645	0.0554607	0.0350878	0.0527103	0.0451822	0.0610683	0.0618271	0.0330039	0.0644562	0.0743973	0.0986184	0.0541197	0.108996
AFFX-r2-Bs-phe-3_at	8.13974	8.14346	8.33274	8.11629	8.13089	8.35973	8.30462	8.24163	8.37142	8.48516	8.2359	8.29653	8.56583	8.43283	8.0528	8.27582	8.27729	8.22007	8.38289	8.46987	0.0486171	0.0416658	0.0379441	0.0571906	0.0583478	0.0878475	0.0695701	0.0713634	0.0711809	0.0377909	0.054857	0.0542278	0.0677312	0.0655691	0.0409357	0.0312758	0.0292616	0.0366967	0.0177846	0.039904
AFFX-r2-Bs-phe-5_at	7.39513	7.187	7.54092	7.28433	7.43541	7.69818	7.7126	7.64567	7.85006	7.89301	7.55725	7.71294	8.01884	7.82324	7.5462	7.74811	7.84466	7.72861	7.8099	7.89473	0.0681613	0.0595489	0.066916	0.0923245	0.0658683	0.134451	0.111958	0.111128	0.102347	0.0776881	0.0972213	0.0811304	0.112899	0.106012	0.0675215	0.0279017	0.0300023	0.0347604	0.0224973	0.0425734
AFFX-r2-Bs-phe-M_at	6.99411	6.92921	7.24758	6.98311	7.1652	7.38167	7.33635	7.30203	7.45859	7.52469	7.2879	7.39968	7.62713	7.52788	7.17454	7.42783	7.40789	7.36824	7.54995	7.665	0.0762044	0.0636535	0.0522682	0.100052	0.0767827	0.122165	0.10092	0.0974924	0.0915476	0.0681659	0.0826667	0.06715	0.0940665	0.0883637	0.06684	0.0251241	0.0354143	0.0488349	0.0144024	0.0435767
AFFX-r2-Bs-thr-3_s_at	9.45514	9.356	9.54391	9.42419	9.453	9.69485	9.57889	9.56329	9.68181	9.72046	9.52787	9.5987	9.8352	9.71927	9.31469	9.5597	9.56936	9.58146	9.67498	9.76099	0.0696269	0.0382738	0.0276982	0.036326	0.0432747	0.0519911	0.0380579	0.0427755	0.0388428	0.0231468	0.0318953	0.0246007	0.0486169	0.0371122	0.0229091	0.0343922	0.0433876	0.0538573	0.0311196	0.0550899
AFFX-r2-Bs-thr-5_s_at	5.72945	5.59253	5.97598	5.5704	5.7648	6.4052	6.35787	6.33572	6.51064	6.514	6.07417	6.25136	6.71579	6.50327	6.1255	6.21293	6.28122	6.199	6.31041	6.49414	0.0928716	0.106341	0.105007	0.136628	0.121089	0.20964	0.167521	0.194309	0.17196	0.151336	0.167677	0.114823	0.169979	0.165254	0.125188	0.0621946	0.0448806	0.0380929	0.0456274	0.0407878
AFFX-r2-Bs-thr-M_s_at	7.63356	7.51837	7.79098	7.66305	7.70603	8.03376	7.94384	7.87153	8.00804	8.09141	7.85908	7.86017	8.25207	8.03387	7.70341	7.89072	7.88888	7.88359	8.02294	8.08842	0.0701021	0.0468573	0.0464809	0.0668612	0.0622731	0.0995813	0.0825673	0.0928846	0.0728528	0.0532201	0.0795955	0.0608352	0.0907016	0.0753544	0.052643	0.0333534	0.0274612	0.0384064	0.0158436	0.0371833
AFFX-r2-Ec-bioB-3_at	9.03707	9.02242	8.9967	8.95463	8.9567	8.93751	8.88277	8.82909	8.91853	9.00348	8.98877	8.96544	8.97183	8.96774	8.8286	9.0766	9.05341	8.96772	8.98118	8.89781	0.0169037	0.0240326	0.0150371	0.0143012	0.0185457	0.0136442	0.0181574	0.011476	0.016434	0.0193074	0.0103393	0.0146543	0.0122113	0.0167203	0.0139914	0.0202962	0.0146113	0.017554	0.0079715	0.0148189
AFFX-r2-Ec-bioB-5_at	8.87923	8.7876	8.89495	8.76576	8.7617	8.79334	8.76688	8.6904	8.81368	8.7999	8.91043	8.75516	8.76435	8.75452	8.7136	8.88149	8.95367	8.84757	8.82104	8.83113	0.0213663	0.0317422	0.0200821	0.0150654	0.0292772	0.0145007	0.0190307	0.00981553	0.0134362	0.02251	0.0259662	0.0270583	0.0288967	0.0266395	0.0242396	0.0231943	0.0214189	0.0182088	0.0145874	0.0201598
AFFX-r2-Ec-bioB-M_at	8.96227	8.90639	8.87817	8.91582	8.84314	8.88745	8.83367	8.82124	8.88921	8.99645	8.97654	8.93997	8.96437	8.92665	8.84784	9.03438	9.06248	8.99433	8.97176	8.93197	0.0199007	0.0261636	0.0230796	0.0152741	0.026098	0.0169038	0.0141027	0.0188842	0.018153	0.0179691	0.0238974	0.025412	0.028939	0.021547	0.0242058	0.0196206	0.0224539	0.0152663	0.0233496	0.0144946
AFFX-r2-Ec-bioC-3_at	10.6164	10.5812	10.5445	10.545	10.5213	10.5675	10.5378	10.4842	10.5608	10.6245	10.6791	10.6196	10.6499	10.5902	10.4941	10.6988	10.7399	10.6331	10.6125	10.5927	0.0175392	0.0278288	0.029989	0.0198867	0.0274347	0.019702	0.0180293	0.0239356	0.0205935	0.0189623	0.0299573	0.0300646	0.0288041	0.0277184	0.0262601	0.0240441	0.0302153	0.022348	0.0279502	0.0245116
AFFX-r2-Ec-bioC-5_at	10.7424	10.6904	10.6476	10.6406	10.5764	10.6362	10.6064	10.5736	10.6136	10.6511	10.6986	10.6713	10.74	10.624	10.5267	10.7749	10.7914	10.6895	10.6827	10.6351	0.0152799	0.021948	0.0187044	0.0102593	0.0209868	0.00930438	0.012438	0.0146879	0.00928854	0.0107475	0.0214137	0.0172106	0.0219964	0.0191928	0.0218258	0.013913	0.0195461	0.0137012	0.0179264	0.0188241
AFFX-r2-Ec-bioD-3_at	12.6608	12.5993	12.5983	12.5678	12.576	12.6372	12.6275	12.6045	12.6987	12.7009	12.7074	12.6893	12.7298	12.6949	12.6027	12.7898	12.7722	12.7029	12.7339	12.694	0.0092522	0.0103114	0.00857701	0.00557033	0.0106537	0.00558962	0.0120372	0.0071877	0.0052027	0.00691378	0.00708696	0.00657936	0.00572122	0.00688446	0.00834186	0.00636227	0.00753157	0.00365781	0.00616076	0.00678657
AFFX-r2-Ec-bioD-5_at	12.1826	12.1101	12.0871	12.0656	12.09	12.1917	12.1329	12.1138	12.2283	12.2124	12.2521	12.2363	12.2479	12.2621	12.1264	12.3184	12.3391	12.2333	12.2421	12.162	0.0102132	0.0121305	0.0108033	0.00482114	0.0119279	0.0126842	0.0188565	0.0113971	0.0080768	0.0134298	0.00833091	0.00623694	0.00505219	0.00868025	0.0124994	0.010911	0.0101112	0.00725169	0.00761074	0.0119932
AFFX-r2-P1-cre-3_at	13.9143	13.9313	13.9514	13.9385	13.9539	14.0281	13.9911	14.0013	14.0616	14.0778	14.0632	14.0507	14.0824	14.0811	14.0275	14.0977	14.1076	14.1099	14.1008	14.0695	0.00380659	0.00325733	0.00521939	0.00274464	0.00398081	0.00176696	0.00595152	0.00281524	0.00343978	0.00318008	0.0032044	0.00364437	0.00310441	0.00434531	0.00570179	0.00396099	0.004797	0.00186774	0.00266619	0.00640518
AFFX-r2-P1-cre-5_at	13.7678	13.7731	13.7742	13.7584	13.7779	13.8711	13.8438	13.8549	13.9074	13.9143	13.9153	13.9049	13.9457	13.916	13.8631	13.9673	13.9572	13.9481	13.9431	13.9173	0.00543378	0.00430049	0.00619827	0.00274382	0.00460472	0.00327791	0.00815565	0.00479451	0.0042364	0.00537647	0.00409975	0.0024051	0.00446252	0.00500784	0.0052747	0.00540584	0.00577593	0.00228404	0.00485275	0.00601679
AFFX-ThrX-3_at	8.96611	8.87129	9.06787	8.90742	8.9701	9.18339	9.08083	9.04935	9.15986	9.22953	8.96521	9.04861	9.33717	9.17044	8.83463	9.06728	9.07162	9.05121	9.20103	9.30047	0.0734295	0.0416811	0.0339069	0.0394633	0.0439999	0.0607414	0.0468627	0.0468322	0.0417623	0.0268639	0.0326691	0.0267976	0.0530278	0.040885	0.0247786	0.0383591	0.0442	0.0562254	0.0351403	0.0610768
AFFX-ThrX-5_at	4.68871	4.52507	4.8449	4.61756	4.70377	5.22505	5.10008	5.14794	5.24173	5.20076	4.87467	4.95258	5.39202	5.15882	4.88637	5.00262	5.01219	5.0116	5.09456	5.19679	0.0991525	0.0950236	0.0875973	0.113109	0.108732	0.20752	0.178809	0.190053	0.174571	0.139536	0.141633	0.124514	0.186258	0.160469	0.126753	0.0611492	0.0452379	0.037927	0.0466168	0.0595289
AFFX-ThrX-M_at	6.9536	6.86821	7.18764	6.96529	7.04773	7.44965	7.3314	7.26701	7.39523	7.44094	7.18286	7.24918	7.61771	7.46383	7.05527	7.28696	7.27671	7.2553	7.39777	7.48562	0.0723747	0.0592329	0.0573077	0.0847858	0.0710253	0.112651	0.0972735	0.104267	0.0927083	0.0673373	0.0808181	0.0668725	0.108365	0.0869753	0.0607508	0.0298183	0.0355186	0.0469335	0.0184172	0.0530241
AFFX-TrpnX-3_at	3.15198	3.17484	3.15654	3.10501	3.14225	3.05727	3.05183	3.048	3.11869	3.10882	3.13354	3.12909	3.09519	3.13434	3.12783	3.13929	3.17359	3.14538	3.12101	3.18226	0.0301768	0.0370735	0.0245214	0.0335722	0.0298841	0.0228842	0.0215567	0.0185937	0.031062	0.0276305	0.0179194	0.0178441	0.012717	0.0308216	0.0219937	0.0345781	0.0301121	0.0190778	0.0240856	0.0140889
AFFX-TrpnX-5_at	3.44615	3.48937	3.44414	3.40817	3.39991	3.41568	3.38526	3.40522	3.40959	3.41119	3.50814	3.41863	3.44013	3.38992	3.45917	3.40445	3.42863	3.40123	3.44383	3.45112	0.029596	0.0302326	0.0276756	0.031619	0.0200448	0.0394363	0.0364031	0.0180144	0.0335237	0.0407277	0.0221971	0.0251828	0.0210694	0.0304539	0.0235488	0.0443683	0.0193053	0.0192602	0.0164289	0.0384804
AFFX-TrpnX-M_at	3.35675	3.33178	3.3452	3.37202	3.34877	3.30384	3.34851	3.29736	3.35122	3.34058	3.39574	3.37557	3.28067	3.37761	3.3721	3.34907	3.4059	3.34695	3.3094	3.32854	0.0417498	0.0367411	0.0218033	0.0291448	0.0357558	0.0259858	0.0308755	0.0311286	0.0336689	0.0164284	0.0302723	0.0271835	0.0231994	0.0226076	0.0329958	0.0534326	0.0301871	0.0345822	0.0159292	0.0314414
axo00001-f_at	3.74697	3.75736	3.67322	3.80667	3.70002	3.60123	3.60928	3.66593	3.61864	3.5925	3.64501	3.65478	3.6553	3.66988	3.73314	3.76578	3.70319	3.69096	3.66321	3.75906	0.0334451	0.0416172	0.0335336	0.0663714	0.0559189	0.0520298	0.0239215	0.0254595	0.0218015	0.0306776	0.0333324	0.0302088	0.0356895	0.0332882	0.0525773	0.0394001	0.0553607	0.0443751	0.0455592	0.0327567
axo00002-f_at	9.15337	9.1873	9.26943	9.29005	9.42974	9.39592	9.37097	9.35679	9.50257	9.25149	9.84736	9.85923	9.81304	9.69935	9.68765	9.73283	9.50083	9.68664	9.68071	9.5235	0.0585587	0.0482134	0.0425519	0.0369122	0.0610525	0.0729778	0.0674689	0.0866208	0.0753412	0.101262	0.0724279	0.0724661	0.0759267	0.0598515	0.0759911	0.0504584	0.0511978	0.0386722	0.0444685	0.0515108
axo00003-r_at	4.3372	4.15281	4.42457	4.14545	3.94133	3.82903	4.05597	4.01643	4.13296	4.10138	4.07849	4.00779	4.20282	3.84735	3.99369	4.0812	3.83547	3.97176	3.85694	4.0469	0.166603	0.0925087	0.146344	0.111631	0.0777035	0.0409213	0.100257	0.0947622	0.0989897	0.097077	0.082036	0.105622	0.101024	0.0491973	0.0875566	0.14735	0.0389714	0.0876126	0.0321572	0.0591236
axo00004-r_at	4.20607	4.43742	4.15276	4.20038	4.15189	4.15023	4.20746	4.04016	4.16871	4.12577	4.25734	4.21392	4.18899	4.27952	4.21174	4.34016	4.31789	4.42114	4.42315	4.80167	0.0767982	0.0632783	0.0575894	0.0619443	0.056333	0.0686465	0.0656403	0.0628118	0.0601486	0.0538039	0.0475145	0.0646257	0.06437	0.0852408	0.0461025	0.105027	0.0417554	0.134419	0.0610749	0.0852752
axo00006-f_at	11.7192	11.5522	11.4761	11.6377	12.1174	12.4953	12.7423	12.6575	12.8253	12.9332	13.1598	13.3637	13.2185	13.5159	13.5732	13.5303	13.4654	13.6641	13.8999	13.7208	0.0378037	0.0632152	0.0632253	0.0543293	0.0609393	0.0549791	0.0330725	0.0542212	0.0561393	0.0527343	0.0338234	0.0307983	0.0357031	0.0311826	0.0261712	0.03594	0.0363904	0.0163653	0.0109484	0.0271585
axo00008-f_at	10.4194	9.97169	9.84001	9.64571	9.76576	9.70946	9.69499	9.74208	9.67392	9.74348	9.72134	9.613	9.58028	9.64358	9.71567	9.73358	9.75231	9.73744	9.77539	9.69991	0.0293522	0.0271301	0.0320783	0.0283434	0.0172135	0.0214772	0.0168932	0.0160211	0.0181711	0.0148089	0.0147377	0.0275418	0.0192833	0.025469	0.0140167	0.0231156	0.0173263	0.0165198	0.00999598	0.0205779
axo00009-r_at	5.4779	4.99652	4.53902	4.61734	4.58121	4.92392	4.71899	4.63657	4.62329	4.53323	4.63682	4.59978	4.56035	4.30035	4.26733	4.36979	4.45366	4.40846	4.22068	4.22473	0.172205	0.214813	0.139886	0.110302	0.0762209	0.177823	0.111184	0.102697	0.0821225	0.08642	0.0662643	0.0685833	0.0785538	0.0351305	0.0318657	0.059275	0.0529115	0.0501882	0.0387785	0.043398
axo00011-f_at	8.31569	8.40329	8.39631	8.60991	8.33814	8.29639	8.42265	8.08698	7.91642	8.15864	8.4008	8.20672	8.34215	8.17249	8.07431	8.7594	8.17206	8.82342	9.2534	8.79877	0.0407499	0.0575176	0.0496291	0.0281408	0.0387426	0.0461815	0.0464092	0.0378382	0.0416096	0.0546829	0.0605982	0.0425721	0.0238038	0.027185	0.0285769	0.0884324	0.0502161	0.0570299	0.0398957	0.0468743
axo00012-r_at	8.87967	9.71644	9.89111	9.5861	9.64944	9.63227	9.38898	9.28371	9.53464	9.43902	10.0597	9.80305	9.74163	9.68529	9.7156	9.7019	9.57068	9.40478	9.79907	9.93636	0.0444011	0.0237287	0.0278	0.0271008	0.0375662	0.039505	0.0471965	0.0576426	0.050172	0.0266182	0.0375116	0.0382604	0.0321477	0.0320338	0.0240282	0.0507465	0.0465963	0.0460941	0.0262013	0.0220546
axo00013-f_at	5.70062	6.07937	5.72502	6.19079	6.03906	5.7686	5.40829	4.90574	5.54956	5.30535	5.08993	5.12736	5.18414	4.7196	4.72447	5.09778	4.68198	5.44245	4.86848	5.49191	0.161353	0.148591	0.153406	0.113073	0.140339	0.108325	0.13523	0.149333	0.120568	0.146082	0.100495	0.158608	0.139546	0.130333	0.169857	0.134383	0.215438	0.172008	0.186531	0.120839
axo00014-r_at	9.8059	9.51286	9.50067	9.42243	9.31329	9.23512	9.1848	9.16483	9.2659	9.20035	9.26063	9.27202	9.25134	9.39889	9.38986	9.42106	9.3476	9.32599	9.47173	9.54726	0.0137755	0.0137025	0.0159844	0.0211454	0.0104422	0.0184055	0.0176458	0.0148768	0.0123787	0.0204664	0.021454	0.0149244	0.02376	0.0226065	0.0191546	0.0220988	0.016558	0.0212145	0.0189745	0.0246791
axo00015-f_at	3.37433	3.30232	3.29981	3.38716	3.35763	3.34985	3.32965	3.31837	3.35393	3.28457	3.37718	3.39438	3.33403	3.33267	3.39532	3.49383	3.5417	3.4968	3.43566	3.30212	0.0392506	0.0393551	0.0369826	0.0643382	0.0291823	0.0390825	0.0402092	0.0352337	0.0359225	0.0319374	0.0273685	0.0508411	0.0363474	0.0456102	0.0321107	0.0315697	0.0368557	0.0457004	0.0379468	0.02662
axo00017-f_at	11.5776	11.4239	11.4024	11.4924	11.3741	11.3047	11.2517	11.3245	11.1763	11.2628	11.366	11.4595	11.4103	11.4248	11.4839	11.5	11.5016	11.4997	11.4811	11.5364	0.0170656	0.0185593	0.0180171	0.011038	0.0137667	0.0166776	0.0170062	0.0133029	0.0113889	0.0209727	0.0190444	0.0206987	0.01726	0.0232852	0.0151658	0.011308	0.0139809	0.0173692	0.00556684	0.00449271
axo00018-f_at	7.44677	7.20981	7.10683	6.93056	7.10913	7.59621	7.81886	8.02241	7.92	7.90953	7.60837	7.94595	8.19556	8.13956	8.30119	8.01467	8.18019	8.47392	8.38233	8.22133	0.036722	0.0520976	0.072338	0.0630248	0.0312728	0.0631262	0.0388092	0.0450922	0.032257	0.0357351	0.0287108	0.0366834	0.0296972	0.0205267	0.0380447	0.0240961	0.0235235	0.0245597	0.0424064	0.0316848
axo00019-f_at	7.28942	7.15572	7.89628	7.84316	7.79413	7.34954	7.54672	7.63726	7.79338	7.91975	7.81442	7.98059	7.82439	7.88497	7.98057	7.89521	7.86413	8.09718	7.87678	7.75139	0.0453446	0.076603	0.0464625	0.0477676	0.0299557	0.0746962	0.046655	0.0624153	0.0380181	0.042321	0.0532731	0.0411416	0.0402771	0.0361886	0.039435	0.0523429	0.0317718	0.0287271	0.0377758	0.0496079
axo00020-f_at	6.61664	6.74921	8.74382	7.96981	8.1384	6.89247	6.60289	6.03939	6.31512	6.39659	5.9749	5.79398	5.69426	6.00103	5.39854	5.54595	5.59793	5.89957	5.58152	5.04474	0.286245	0.309938	0.108689	0.298877	0.195552	0.28894	0.27908	0.367934	0.251169	0.200396	0.228227	0.268219	0.247388	0.207846	0.172433	0.239397	0.240448	0.27973	0.229705	0.184006
axo00021-f_at	5.1547	5.33517	5.24069	5.05772	5.03779	4.93253	4.93034	4.82575	4.80283	4.71329	4.87025	4.96434	4.90375	4.94396	5.16758	5.37236	5.00685	5.2139	5.33318	5.43457	0.0519458	0.0638124	0.0703336	0.0521894	0.042244	0.0519975	0.0261089	0.0287237	0.0382415	0.0639629	0.0351095	0.0538472	0.0678857	0.0910385	0.0639493	0.0660096	0.0234672	0.0665336	0.0788727	0.0501446
axo00022-f_at	7.49278	7.78293	7.78155	7.85316	7.6574	7.95238	7.86787	7.83073	7.82947	7.88253	8.04541	7.78543	7.61248	7.64439	7.67331	7.93581	7.77931	7.60552	7.41116	7.54404	0.0477732	0.0438918	0.0531798	0.021722	0.0299232	0.0306806	0.0422055	0.0137314	0.0153058	0.0247497	0.0410748	0.0248108	0.0235542	0.0158547	0.024232	0.0317768	0.0408477	0.0290228	0.0211599	0.0418103
axo00024-r_at	3.5575	3.7094	3.73593	3.59957	3.50129	3.60612	3.46764	3.61429	3.63121	3.63707	3.65028	3.60838	3.62675	3.61445	3.65091	3.56177	3.60576	3.62174	3.57686	3.71255	0.0734401	0.0433089	0.0669677	0.0285823	0.0282635	0.0325443	0.0255101	0.0465218	0.0412014	0.0563999	0.036089	0.0360393	0.04902	0.0219997	0.0321785	0.0330666	0.0396037	0.0468548	0.0342039	0.0530895
axo00026-f_at	3.95196	3.93925	3.89337	3.88617	3.80921	4.03894	4.02257	3.96631	4.06223	3.97779	4.13125	4.11816	4.07889	4.12603	4.054	4.204	4.26742	4.03687	3.99233	3.95116	0.0641094	0.0332806	0.0562559	0.0450335	0.0391239	0.057435	0.0457568	0.066615	0.0577719	0.055782	0.0633191	0.0543045	0.0500757	0.0613261	0.041443	0.0521159	0.082599	0.0684725	0.0292612	0.0328934
axo00028-f_at	9.36286	9.55279	9.3834	9.17516	9.22983	9.2806	9.14525	9.2694	9.42845	9.74848	9.45632	9.36567	9.55506	9.90087	10.1916	10.3199	10.4599	10.6247	11.0272	10.9889	0.0191387	0.0244081	0.0296209	0.0359399	0.0432272	0.0292775	0.0289881	0.0370227	0.0407285	0.0321763	0.0309112	0.0480086	0.0339968	0.0272913	0.0375432	0.0316801	0.0320856	0.0397327	0.0241798	0.0215133
axo00029-f_at	4.62942	4.61728	4.57137	4.63497	4.6341	4.52738	4.43939	4.43551	4.4877	4.50469	4.55365	4.53192	4.42917	4.49808	4.42761	4.57287	4.51711	4.54201	4.55764	4.49355	0.0882868	0.0286728	0.0344625	0.0645627	0.0573263	0.0180244	0.0290363	0.0387356	0.0371185	0.0351926	0.0378318	0.037013	0.0338909	0.0550268	0.0309696	0.0641986	0.0478454	0.037629	0.0510866	0.0350936
axo00030-f_at	3.77341	3.74991	3.79162	3.83267	3.6908	3.6977	3.65828	3.66125	3.72267	3.77736	3.7508	3.78097	3.75368	3.78423	3.80462	3.80394	3.83047	3.85055	3.84572	3.86945	0.0298315	0.0209964	0.0319751	0.0373708	0.0242011	0.0429599	0.0237431	0.0463755	0.0389075	0.0575107	0.0472031	0.0269896	0.0328876	0.0444337	0.0241206	0.0281276	0.0531299	0.0304821	0.0247344	0.047299
axo00031-f_at	7.09601	7.20923	7.24454	7.12666	6.77627	6.75703	7.14354	7.20977	7.24561	7.29229	7.41779	7.37223	7.4376	7.40299	7.46906	7.39112	7.55371	7.39893	7.37809	7.46597	0.0428121	0.0187774	0.0356387	0.024622	0.0401379	0.0381033	0.0245098	0.0316796	0.0370218	0.021726	0.0270086	0.0243969	0.0297709	0.0175813	0.0199173	0.0159829	0.0165541	0.013	0.0211634	0.0242117
axo00032-f_at	5.804	5.8142	5.36026	5.39903	5.78072	5.85051	6.30172	6.54419	6.52196	6.14531	6.09927	6.20249	6.58332	6.40307	6.57379	6.58808	6.55037	6.5226	6.59987	6.42155	0.0330184	0.0328143	0.0515188	0.0647062	0.0614316	0.0523763	0.0746308	0.047748	0.0498887	0.0535641	0.0445382	0.0545852	0.0485021	0.0240031	0.0424476	0.0397668	0.0223246	0.0540961	0.0294497	0.0394668
axo00033-f_at	10.1604	10.1716	10.1591	10.1439	10.0582	10.2718	10.3157	10.3212	10.2507	10.5135	10.548	10.6814	10.5237	10.6179	10.6044	10.4775	10.4411	10.6166	10.6787	10.6822	0.0188527	0.0221098	0.0220887	0.0176566	0.0131612	0.0202834	0.0323277	0.034217	0.0383392	0.0313841	0.0270676	0.0197161	0.0106365	0.0108408	0.0127	0.0166532	0.0245573	0.0210996	0.0146663	0.0102391
axo00034-f_at	4.31811	4.2292	4.05107	4.08737	4.01217	4.2373	4.33277	4.35895	4.2328	4.53913	4.45099	4.48154	4.38088	4.44583	4.50648	4.30439	4.30741	4.29572	4.11488	4.26574	0.0693032	0.0553941	0.0456481	0.0496081	0.0386839	0.0612754	0.0629936	0.0754132	0.052026	0.0870177	0.0642808	0.0746992	0.0530096	0.0784868	0.0632484	0.0641224	0.0612594	0.062698	0.066603	0.058786
axo00035-f_at	4.06813	4.15578	4.10903	4.11673	4.11777	4.03029	4.10965	4.14916	4.11277	4.09001	4.1812	4.1861	4.14496	4.16879	4.17051	4.18113	4.07112	4.19115	4.17027	4.22877	0.0381898	0.0299835	0.0329507	0.0393505	0.0357129	0.0325075	0.0191776	0.0409	0.0364977	0.0329613	0.0419332	0.0282414	0.0371928	0.0298698	0.0264668	0.0320722	0.0252161	0.0335468	0.028482	0.0445508
axo00036-f_at	3.51854	3.60863	3.64307	3.60626	3.67102	3.60153	3.58383	3.62534	3.58244	3.60541	3.70967	3.68186	3.5654	3.65868	3.63698	3.63872	3.68464	3.53057	3.6529	3.60946	0.0399385	0.0505652	0.0364636	0.0282776	0.0370258	0.050438	0.0485218	0.0294697	0.0518717	0.0537381	0.0397203	0.0399777	0.0414527	0.0538261	0.0399204	0.0601714	0.0308365	0.0382486	0.0287487	0.0550054
axo00037-f_at	3.77867	3.85697	3.82846	3.82943	3.82181	3.7189	3.67943	3.822	3.74691	3.82343	3.88779	3.78931	3.74457	3.75264	3.78212	3.83391	3.72914	3.76614	3.86486	3.85087	0.0501848	0.0432675	0.046345	0.056039	0.0421615	0.0421536	0.0380868	0.0473434	0.0518844	0.0452397	0.0408257	0.0397058	0.0631204	0.0388297	0.0287828	0.0447847	0.0409873	0.0383653	0.0329225	0.0278023
axo00042-f_at	8.27217	8.2011	8.05952	7.84744	8.20193	8.66299	8.64256	8.88229	8.94386	8.98078	8.85884	8.71237	8.79985	8.80954	8.70423	8.64768	8.65416	8.61464	8.60298	8.54899	0.0279156	0.0168924	0.0214821	0.0323981	0.0158579	0.0165516	0.018984	0.0245214	0.0230361	0.0191261	0.0225328	0.0105354	0.023509	0.0246393	0.0160022	0.031479	0.0264572	0.0275272	0.0206246	0.0305397
axo00043-f_at	3.38601	3.3352	3.31128	3.32978	3.30776	3.35048	3.30669	3.34422	3.32554	3.31247	3.33096	3.29921	3.38981	3.30016	3.35612	3.31517	3.33867	3.26368	3.3727	3.31324	0.0432387	0.0360121	0.0249834	0.0296278	0.0392446	0.0286312	0.026244	0.0376585	0.0257648	0.0279526	0.018244	0.0350041	0.0444157	0.0277173	0.0300938	0.0237638	0.0442486	0.0454628	0.0306787	0.0556183
axo00044-f_at	14.2705	14.2773	14.2847	14.3126	14.3214	14.2254	14.2181	14.2302	14.2293	14.218	14.1854	14.1592	14.1831	14.1981	14.2185	14.2276	14.2544	14.2075	14.2141	14.2419	0.00688993	0.005128	0.00554257	0.00619522	0.00621746	0.00327333	0.00453546	0.00476627	0.00391743	0.0029542	0.00459691	0.00216758	0.00265247	0.0034159	0.0035356	0.00498857	0.00384116	0.00534309	0.00249953	0.00370027
axo00045-f_at	4.08773	4.14847	4.0259	4.13308	4.11744	3.96308	4.05743	4.05102	4.04098	4.11128	4.05952	4.13948	4.10245	4.05676	4.1551	4.06277	4.15833	4.26097	4.17892	4.1183	0.0490428	0.0374884	0.0395922	0.0483184	0.0537056	0.0641394	0.0368731	0.0534281	0.0292156	0.0453438	0.0529838	0.0579982	0.0537234	0.039969	0.0350902	0.0524895	0.0450535	0.0394815	0.0344971	0.0404607
axo00046-f_at	4.2412	4.1176	4.21343	4.20942	4.27179	4.09803	4.19224	4.22027	4.12197	4.19213	4.11603	4.24396	4.10205	4.15049	4.09516	4.10911	4.00948	3.97525	4.04119	4.07044	0.0218987	0.0563735	0.0576272	0.0544368	0.0186929	0.0507035	0.0412774	0.0289359	0.0547979	0.0464309	0.0592375	0.052073	0.0772635	0.0432014	0.0405951	0.0514153	0.0340438	0.0613956	0.0714433	0.0511839
axo00047-f_at	8.01105	7.92258	7.88963	7.93735	8.11631	8.05797	8.10617	8.26835	8.18467	8.17719	8.14465	8.19081	8.15244	8.10506	8.08417	8.28753	8.23701	8.29221	8.20719	8.11455	0.0211313	0.0163829	0.0280737	0.0246373	0.0166708	0.0381701	0.0206014	0.0121321	0.0205561	0.0273455	0.0187784	0.0188761	0.0222776	0.0257688	0.0186094	0.0177215	0.0171248	0.0281522	0.0146226	0.0202733
axo00048-r_at	3.4607	3.45544	3.57071	3.57997	3.61352	3.60816	3.50666	3.53762	3.61079	3.66242	3.76773	3.61893	3.64739	3.659	3.69989	3.59148	3.69004	3.63331	3.66623	3.53685	0.0445924	0.0313228	0.0456231	0.0481502	0.0362125	0.0373079	0.0429393	0.0599489	0.03934	0.0511401	0.0621437	0.0436686	0.0451291	0.035749	0.0647615	0.0431322	0.0418097	0.0728628	0.042973	0.0504795
axo00050-r_at	9.8005	9.70333	9.66596	9.80504	9.7938	9.87242	9.93509	10.0041	9.82416	9.70221	9.6697	9.75373	9.77481	9.80142	9.85165	9.85922	9.8226	9.72784	9.72167	9.56903	0.01484	0.0124156	0.0194089	0.0134612	0.0184727	0.01323	0.0124483	0.0166763	0.0253154	0.00996318	0.0163138	0.0168841	0.00970039	0.018926	0.0157091	0.0122646	0.0108465	0.00844557	0.0155505	0.0202037
axo00051-f_at	8.70288	8.39574	8.43883	8.21188	8.23443	8.25487	9.0051	9.07766	9.2213	9.17948	9.01428	9.05328	9.27638	9.182	9.02249	9.27412	9.2523	9.06453	9.38387	9.21386	0.0343681	0.0567411	0.0534309	0.0722969	0.0626434	0.0701915	0.0257664	0.0285952	0.0282055	0.0202478	0.0372062	0.0316225	0.0161038	0.0272871	0.0314845	0.0347479	0.0385405	0.0233368	0.022079	0.0249011
axo00052-r_at	8.67358	8.07667	7.93002	7.98463	8.07872	7.97751	7.93425	8.01222	8.19213	7.85701	7.70123	8.09132	8.16852	8.31983	8.32033	8.27989	8.35938	8.27245	8.12636	8.1815	0.0290833	0.0264899	0.0334476	0.0228423	0.032656	0.037321	0.0558334	0.0494493	0.0529757	0.05148	0.0388114	0.0455496	0.0624715	0.0571009	0.038647	0.0392025	0.0168983	0.0224923	0.0388114	0.0212814
axo00053-f_at	4.74812	4.78325	4.72182	4.84516	4.74598	4.77694	4.7246	4.74885	4.74086	4.69708	4.7988	4.83193	4.76812	4.76458	4.78209	4.81358	4.81221	4.75833	4.89265	4.88874	0.0183319	0.0501475	0.0351476	0.0341328	0.048037	0.0571085	0.0359688	0.0324974	0.0343855	0.0406497	0.0330913	0.0217403	0.0311067	0.0261125	0.0198326	0.0363579	0.0268485	0.0282067	0.0290743	0.0343391
axo00054-f_at	5.20182	5.14695	5.05258	5.09506	5.17903	5.3388	5.32406	5.45685	5.53906	5.51178	5.58602	5.64841	6.04765	6.06314	6.10688	5.72966	5.78153	5.85872	5.69365	5.70938	0.0651718	0.0425297	0.0499108	0.0437396	0.0360578	0.0552547	0.0391123	0.0442346	0.0426563	0.0517092	0.0504011	0.0889866	0.057171	0.079592	0.0691017	0.0842327	0.0742987	0.0727776	0.0567036	0.0668693
axo00056-r_at	5.67735	7.62141	7.81036	7.07106	6.76518	6.69623	6.43354	6.39104	6.31837	6.57685	6.95227	6.81301	6.35581	6.49988	6.8335	6.58212	6.84332	6.59863	6.72873	6.5966	0.0891433	0.0483121	0.0493654	0.0530578	0.0730538	0.106027	0.093407	0.0564706	0.0907713	0.0697964	0.10794	0.0952909	0.0729791	0.0516188	0.0568922	0.0552134	0.0815246	0.0519868	0.0872399	0.0586145
axo00057-f_at	4.65852	4.6045	4.46207	4.60638	4.49685	4.82824	4.60555	4.83998	4.64895	4.58398	4.76836	4.5009	4.47922	4.59416	4.51387	4.58206	4.60518	4.46333	4.48897	4.34183	0.0751393	0.0499676	0.0450315	0.073597	0.0452656	0.0331123	0.0289152	0.0402075	0.0642276	0.047149	0.045366	0.0699371	0.0329909	0.0502152	0.0499409	0.0435737	0.0514715	0.0410166	0.0652291	0.0671658
axo00058-f_at	3.87922	3.67462	3.43902	3.34363	3.33019	3.21409	3.19096	3.23544	3.26364	3.36204	3.32194	3.25948	3.37022	3.33858	3.3559	3.43756	3.61693	3.41872	3.42505	3.45743	0.0827008	0.0878236	0.0524017	0.0655229	0.0446269	0.0323769	0.0319564	0.0508797	0.0266534	0.0351373	0.0357846	0.0406842	0.0254041	0.0303527	0.0356115	0.0563919	0.0799209	0.035541	0.0333916	0.0493873
axo00060-f_at	7.23606	6.43473	6.2622	5.46622	5.42902	5.45503	5.35385	5.52897	5.50162	5.5282	5.26873	5.36251	5.81174	5.99442	6.25138	6.24785	6.37908	6.18398	6.37245	6.33859	0.0381298	0.084539	0.0782953	0.076122	0.0555813	0.0499227	0.057866	0.0650845	0.0797519	0.0682126	0.106202	0.083735	0.0508288	0.0621023	0.0483521	0.0991681	0.0861063	0.0775868	0.0477098	0.0520582
axo00062-f_at	5.2925	5.31652	5.25287	5.199	5.27099	5.17318	5.20657	5.12541	5.14023	5.19267	5.31534	5.18032	5.23942	5.2201	5.09998	5.16427	5.15363	5.15949	5.25669	5.18866	0.0277559	0.0245012	0.0377485	0.0392428	0.0382033	0.0293915	0.0330998	0.0225799	0.0323301	0.0379689	0.031192	0.0462581	0.0422929	0.0360895	0.0424464	0.0387601	0.0626379	0.0415785	0.0273906	0.0289237
axo00063-f_at	3.89831	3.86522	3.94792	3.88886	3.87029	3.79322	3.8561	3.79766	3.84587	3.82384	3.92376	3.78876	3.8778	3.83173	3.87264	3.86191	3.84756	3.91685	3.85115	3.84938	0.038053	0.0332922	0.0398218	0.0473295	0.0551732	0.0328367	0.0346229	0.0386726	0.0296881	0.0300532	0.0386633	0.0278476	0.035992	0.041076	0.032718	0.0357843	0.033641	0.0368383	0.0457176	0.0373445
axo00064-r_x_at	12.5404	12.888	12.6127	12.7164	12.3594	12.7532	13.0522	13.0819	13.0767	13.2335	13.4492	13.7046	13.5812	13.5687	13.5956	13.4037	13.3509	13.5383	13.5129	13.3911	0.0562117	0.0283216	0.0372578	0.0544329	0.0445835	0.0254077	0.0173207	0.0240578	0.0251447	0.0183237	0.0259886	0.0147855	0.0123625	0.0187552	0.0103232	0.0193432	0.0193824	0.0138969	0.012974	0.0297785
axo00065-r_x_at	13.0246	13.2228	13.0124	13.0987	12.7048	13.2089	13.4265	13.5177	13.5761	13.671	13.8354	13.964	13.917	13.9418	13.9958	13.7763	13.7568	13.9363	13.9455	13.842	0.0513493	0.0333078	0.0297268	0.0450252	0.040601	0.0167992	0.0156712	0.0205614	0.0207108	0.0118384	0.016202	0.00975396	0.00615365	0.0172106	0.00909542	0.0157891	0.0165857	0.00869421	0.010166	0.0168069
axo00066-f_at	5.61087	5.66748	5.6991	5.66886	5.55929	5.56787	5.61348	5.7587	5.77906	5.99116	6.04974	6.16914	6.09731	6.16264	6.21533	6.07879	6.0433	6.11754	6.04488	6.23095	0.0212782	0.0285952	0.0263275	0.0209223	0.0329611	0.0429272	0.0233024	0.0349531	0.0376929	0.0356801	0.0189316	0.0201089	0.029462	0.0388192	0.0340599	0.0349065	0.0376593	0.0227991	0.0266555	0.0271748
axo00068-f_at	9.31242	9.08645	9.32313	9.15241	9.25158	9.42366	9.26303	9.51599	9.53334	9.40705	9.20756	9.51303	9.37597	9.46169	9.77033	9.53315	9.56469	9.71017	9.62118	9.37143	0.0670011	0.0539002	0.0463501	0.0533076	0.0586752	0.0307491	0.043547	0.0512303	0.0563548	0.060163	0.0501585	0.0452484	0.0595994	0.0441364	0.0238064	0.0529891	0.0214429	0.0437084	0.0529854	0.055959
axo00069-r_at	5.92329	5.59164	5.49102	5.33636	5.25286	5.00802	4.90031	5.05296	4.85895	4.85037	4.60168	4.70161	4.58856	4.59102	4.78221	4.59539	4.7157	4.57374	4.8147	4.68048	0.0643743	0.0627597	0.0278292	0.0511602	0.0576641	0.0743428	0.0365166	0.0316358	0.0762891	0.0435171	0.0472787	0.0557974	0.0463521	0.0403425	0.0664647	0.051159	0.0811024	0.0404195	0.0380845	0.0463907
axo00070-f_at	4.75599	4.80136	4.78112	5.12866	5.03131	5.38687	5.0734	5.07861	5.04547	5.09141	5.12744	5.1156	4.99878	5.00774	4.87968	5.10594	5.10758	5.16338	4.98148	4.88443	0.0632487	0.0660933	0.0599914	0.0604665	0.0753569	0.0331439	0.0700711	0.0546095	0.027343	0.0866377	0.044254	0.0434152	0.0390984	0.0480782	0.0322014	0.0427923	0.0688965	0.0299288	0.0572635	0.0555521
axo00071-f_at	3.67269	3.69592	3.80751	3.72497	3.77275	3.77488	3.78195	3.65335	3.72422	3.7491	3.771	3.60581	3.78119	3.77348	3.72379	3.79671	3.80726	3.77294	3.783	3.6783	0.0484917	0.0222837	0.0772702	0.0498942	0.0339951	0.0398182	0.055611	0.0264315	0.0324811	0.0505135	0.0408788	0.0554197	0.0298667	0.0403127	0.0522276	0.0332184	0.0429311	0.0312426	0.025407	0.0473582
axo00072-r_at	4.53768	4.5868	4.55578	4.45054	4.40845	4.46277	4.44217	4.38445	4.53746	4.43999	4.51049	4.47146	4.61301	4.58401	4.60982	4.62612	4.53141	4.55592	4.54575	4.66136	0.0363007	0.0523853	0.0469272	0.0323671	0.0284445	0.0341416	0.0340895	0.0245734	0.0283184	0.0407666	0.0437608	0.0479773	0.037826	0.0244616	0.0358752	0.0285391	0.0249618	0.0322725	0.0445483	0.0273454
axo00074-r_at	4.33905	4.21371	4.45943	4.4672	4.54236	4.50581	4.50848	4.40218	4.40702	4.34192	4.40676	4.32431	4.25946	4.3298	4.29251	4.3838	4.22767	4.2091	4.30122	4.36163	0.032128	0.0282792	0.0143063	0.0379369	0.0348696	0.034044	0.0420983	0.0321021	0.0247385	0.0524934	0.0356821	0.0269009	0.0366053	0.036871	0.0183554	0.040435	0.035188	0.032809	0.0580159	0.0348176
axo00075-r_at	11.5465	10.8602	10.5871	10.0194	10.1556	9.9911	9.8599	9.74408	9.90151	9.65279	9.3209	9.29515	9.32291	9.12185	8.95516	8.74554	8.74092	8.84475	8.7696	8.79124	0.0214562	0.0452942	0.0537599	0.061777	0.0498021	0.0352839	0.0341228	0.0366072	0.0204568	0.0240533	0.0297324	0.0274377	0.0341416	0.0284167	0.0224808	0.0196875	0.0191407	0.0217854	0.01878	0.0220029
axo00076-f_at	3.89199	3.94062	3.85643	3.81825	3.77253	3.84869	3.89252	3.862	3.86309	3.78273	3.83643	3.82945	3.81378	3.81453	3.75279	3.85199	3.84377	3.85622	3.78911	3.89448	0.0371984	0.0601237	0.0406028	0.0482893	0.0496472	0.0591559	0.030049	0.0170591	0.0383918	0.0411574	0.0306904	0.0423548	0.0341208	0.0528423	0.0405503	0.0583236	0.0365087	0.0343943	0.0423238	0.0488378
axo00078-f_at	4.08705	4.03606	4.02203	4.28258	4.24076	4.36942	4.26476	4.34138	4.24597	4.28404	4.2519	4.23314	4.18789	4.24958	4.11857	4.35796	4.37025	4.24688	4.21639	4.13222	0.0499711	0.0575343	0.0584534	0.0520763	0.0352058	0.0590951	0.0479661	0.0450786	0.026627	0.0422743	0.0469939	0.0357099	0.0495783	0.0595153	0.0288257	0.0520989	0.0718496	0.042429	0.0620355	0.0532472
axo00079-f_at	4.47546	4.46453	4.56402	4.52466	4.42369	4.40327	4.40841	4.4231	4.43837	4.47061	4.37319	4.38515	4.34866	4.37333	4.36904	4.34039	4.30661	4.27537	4.35008	4.41096	0.0469869	0.052042	0.0516999	0.0468197	0.0289848	0.0368819	0.0251742	0.0262479	0.03837	0.0326035	0.0327168	0.0258278	0.0331402	0.0227153	0.0399985	0.0315437	0.0301351	0.0276263	0.0405711	0.0351379
axo00080-r_at	4.5975	4.64579	4.50867	4.59315	4.56493	4.55022	4.48244	4.534	4.46404	4.45951	4.51817	4.5114	4.48297	4.52952	4.51246	4.5437	4.52571	4.5618	4.60158	4.56215	0.0472797	0.0299719	0.0359064	0.0407055	0.0179499	0.031634	0.0335174	0.0519171	0.030661	0.024329	0.0285327	0.0331352	0.0209457	0.041835	0.0376463	0.0335778	0.03325	0.0307125	0.0455693	0.0294563
axo00081-f_at	6.84567	6.72242	6.32862	6.48283	6.60073	7.10159	7.11652	7.24127	7.08957	7.12	6.96742	6.99929	7.10392	7.20434	7.36107	7.09046	6.9923	7.12177	7.09894	7.26048	0.0378424	0.0641108	0.0677804	0.0270741	0.0284098	0.0440764	0.0625669	0.0347654	0.0530019	0.0267004	0.0419947	0.0295973	0.0378586	0.0252853	0.0327069	0.0225205	0.0463769	0.0362687	0.0429779	0.0295363
axo00082-f_at	5.42108	5.33083	5.16043	5.28891	5.13096	5.16324	5.07772	5.12965	5.05184	4.96956	5.31202	5.27102	5.13687	5.12105	4.9586	5.20717	5.33823	5.08983	4.95388	4.90947	0.0478756	0.0556431	0.0919377	0.0458613	0.0350944	0.0813851	0.0795456	0.0434568	0.0410052	0.0490139	0.0246193	0.0355039	0.0578458	0.0321871	0.0359552	0.0488031	0.0671969	0.0687432	0.0321531	0.0418301
axo00083-f_at	8.61588	8.72619	8.79511	8.84378	8.63334	8.14409	8.06188	7.92591	7.79232	7.69375	7.81767	7.87127	7.62672	7.6918	7.6816	7.81296	7.84716	7.72927	7.51374	7.8003	0.0409196	0.0373597	0.0456382	0.0396861	0.0382741	0.016063	0.0255828	0.0346476	0.0379396	0.0309142	0.0363014	0.0245537	0.0439853	0.0444404	0.0337003	0.0330735	0.0327243	0.0339927	0.0218647	0.0293096
axo00084-f_at	4.7694	4.79644	4.86327	4.86413	4.80225	4.8486	4.89738	4.89306	4.87646	4.93993	4.88266	4.8698	4.95994	4.81251	4.87363	4.98333	4.8907	4.96367	4.94258	4.97095	0.0389674	0.0228054	0.0314895	0.0333731	0.0500525	0.0545957	0.0617669	0.0524693	0.0251677	0.0261396	0.042234	0.0385919	0.0470312	0.0344921	0.0336616	0.025795	0.0323307	0.0543761	0.0292216	0.0629015
axo00085-f_at	10.1107	10.0996	10.1881	10.2103	10.255	10.1679	10.0785	10.0069	9.98263	9.89483	9.89671	9.77331	9.77045	9.79749	9.8276	9.85256	9.79603	9.4151	9.68757	9.91161	0.0217452	0.0159195	0.0197465	0.0186844	0.0250112	0.00996928	0.0144188	0.0173849	0.0283309	0.0179528	0.0185722	0.0197948	0.0121046	0.0182844	0.0129904	0.0145543	0.014763	0.00983175	0.0255035	0.0201505
axo00086-f_at	4.57152	4.58032	4.59479	4.65328	4.60459	4.67291	4.52739	4.69509	4.61286	4.58025	4.66564	4.55565	4.60134	4.60356	4.51135	4.54737	4.58688	4.56142	4.55372	4.56746	0.0543275	0.027013	0.0332322	0.0323676	0.0312711	0.052847	0.0406741	0.0294995	0.0314969	0.0235215	0.0428707	0.0338255	0.0319086	0.0421913	0.0193065	0.0395202	0.0209465	0.0243318	0.0449676	0.0337411
axo00087-r_at	3.59993	3.57995	3.44876	3.59473	3.50666	3.4308	3.43988	3.44691	3.39397	3.48123	3.50311	3.47294	3.48735	3.43888	3.49137	3.45788	3.47433	3.45788	3.37362	3.52372	0.0479715	0.0544283	0.0526297	0.0623914	0.0530477	0.046931	0.0568818	0.0649748	0.0561454	0.0252537	0.0461478	0.0392606	0.0414539	0.0461885	0.0313878	0.0395272	0.0440334	0.0475307	0.0634745	0.066672
axo00088-f_at	4.5172	5.00304	5.1795	4.93422	4.98129	4.99194	4.90948	4.98307	5.0071	5.08936	4.90419	4.971	5.02459	4.88265	5.11589	4.88656	4.92248	5.11421	4.9088	4.9885	0.0765286	0.0646095	0.0921854	0.0521988	0.0939066	0.0612182	0.0398463	0.0309102	0.0431773	0.0874585	0.057793	0.0368048	0.0384837	0.0678622	0.0462773	0.0627545	0.0213464	0.0488608	0.0549799	0.0663903
axo00090-r_at	7.0382	7.08965	7.1688	6.95285	6.95326	7.33892	7.50311	7.5682	7.48297	7.4214	7.3644	7.37909	7.65138	7.73454	7.77137	7.69133	7.71512	7.70018	7.70386	7.65875	0.0445758	0.0374154	0.0338603	0.0216661	0.0445212	0.0171743	0.0170429	0.0182296	0.0120719	0.0166247	0.0219202	0.0172555	0.0191036	0.0197842	0.00979272	0.0352056	0.0344338	0.0302142	0.0139588	0.0299425
axo00092-f_at	5.37472	5.16424	4.91713	5.0288	5.00579	5.505	5.27917	5.0524	5.17812	5.35081	4.92239	5.18795	5.31637	5.60584	5.50267	5.04827	5.64667	6.01999	5.74036	5.51612	0.149445	0.0674826	0.12933	0.183179	0.158766	0.177696	0.113286	0.150579	0.111741	0.121223	0.146777	0.153623	0.110648	0.0935216	0.154929	0.130678	0.114549	0.0616767	0.140044	0.143595
axo00094-f_at	4.3947	4.2257	4.67221	4.70033	4.62936	4.59809	4.46703	4.43587	4.40714	4.71512	4.42538	4.42673	4.54136	4.66478	4.69211	4.63151	4.66634	4.66873	4.63212	4.68891	0.0308767	0.0498959	0.0476206	0.0495477	0.059868	0.026001	0.0347942	0.0402056	0.0468956	0.0398705	0.0595677	0.0473545	0.0350646	0.0292623	0.040235	0.0685501	0.0506621	0.0396413	0.0716769	0.0651606
axo00095-f_at	4.0883	4.03541	4.07149	3.99056	4.08124	4.15566	4.0003	4.0731	4.05689	4.02137	4.16375	4.16293	4.15835	4.04271	4.07423	4.16529	4.10491	4.13215	4.1075	4.07634	0.0453868	0.0477917	0.0376793	0.0339538	0.0316586	0.0313555	0.0443027	0.0481514	0.0329976	0.0385519	0.0409412	0.0534047	0.0379963	0.0349177	0.0325783	0.0529431	0.0420632	0.0321567	0.033983	0.0233214
axo00096-f_at	9.41853	9.20131	9.41597	9.35878	9.3411	9.75685	9.81688	9.80977	9.76285	9.82072	9.76135	9.79985	9.74234	9.78506	9.90008	9.82885	9.53136	9.71374	9.85286	9.91656	0.0361749	0.0434443	0.0399138	0.089828	0.0536864	0.0225601	0.0360359	0.034748	0.0359196	0.0233646	0.0299394	0.0203669	0.039221	0.0246158	0.0264801	0.0138019	0.0668204	0.0329606	0.0278057	0.0450336
axo00097-f_at	3.84096	3.79489	3.85332	3.92414	3.75444	3.9093	3.79794	3.70263	3.80077	3.83779	3.80326	3.80142	3.81882	3.81842	3.84153	3.70551	3.80383	3.86153	3.89256	3.83782	0.0459978	0.0453001	0.0559246	0.0514468	0.0430464	0.0439127	0.0587136	0.0409387	0.0250956	0.0130829	0.0414977	0.0216593	0.0382582	0.036813	0.0280696	0.0426066	0.0288724	0.0429394	0.0419999	0.0470136
axo00098-f_at	6.49918	6.56602	6.58402	5.98514	6.15152	6.24204	6.28403	6.39891	6.51416	6.8436	6.49905	6.44434	6.56572	6.83315	7.18411	7.06783	7.33459	7.70158	8.01761	8.04175	0.056486	0.0572438	0.0484899	0.0727833	0.0566034	0.048138	0.0438792	0.0469374	0.0644533	0.0569165	0.0647735	0.0821551	0.0670108	0.0672736	0.0610626	0.0556928	0.0400892	0.0544461	0.0572174	0.0522398
axo00099-f_at	4.11533	4.21608	4.09156	4.24009	4.25496	4.38022	4.35935	4.21382	4.22317	4.24513	4.43409	4.45636	4.35058	4.21277	4.30192	4.51876	4.36156	4.3617	4.29374	4.13959	0.0208506	0.0604344	0.0718847	0.040534	0.053367	0.070643	0.0631258	0.0491882	0.0533809	0.0365503	0.0551561	0.0489917	0.0465784	0.0325938	0.0377089	0.0723362	0.0696852	0.0661353	0.0521084	0.0464115
axo00100-f_at	3.17081	3.20078	3.27482	3.29111	3.25448	3.20623	3.24306	3.23399	3.24941	3.20391	3.29619	3.20862	3.22072	3.28171	3.24999	3.34933	3.32288	3.32167	3.30326	3.38068	0.0325215	0.0230737	0.0245365	0.0521825	0.0224566	0.0394871	0.0295387	0.041378	0.0353176	0.0289336	0.0409177	0.0312959	0.0306578	0.0376379	0.0382713	0.0352809	0.0315917	0.0270009	0.0390668	0.033203
axo00101-f_at	7.07133	7.00838	7.34902	7.43924	7.53627	7.55442	7.45502	7.67309	7.28559	7.35647	7.11944	7.39765	7.33135	7.32197	7.67465	7.50068	7.44886	7.75278	7.50682	7.30677	0.0327805	0.0469583	0.0434244	0.0321624	0.0472258	0.0236092	0.0502424	0.0393988	0.0451211	0.057864	0.0412172	0.0344055	0.0399943	0.0442979	0.0243378	0.0456721	0.0493972	0.0604334	0.0345647	0.0618776
axo00102-f_at	5.80893	5.78194	5.77446	5.84256	5.78087	6.02659	5.99402	5.9791	5.88697	5.85576	5.92833	6.02134	5.96405	5.86302	5.87326	5.80273	5.80708	5.84555	5.71856	5.62317	0.0234783	0.0226068	0.0334858	0.0227899	0.0234985	0.0261538	0.0391715	0.027493	0.0451819	0.035817	0.0265789	0.0352186	0.0297486	0.0203713	0.0175504	0.0405257	0.0323286	0.030325	0.0306852	0.0414661
axo00103-f_at	3.73838	3.86162	3.66544	3.80197	3.80766	3.62624	3.76606	3.73599	3.77566	3.75531	3.74428	3.70999	3.71449	3.83132	3.76176	3.78384	3.69469	3.77681	3.74146	3.73163	0.037008	0.0481605	0.0444844	0.0438461	0.018274	0.0498347	0.069163	0.0157899	0.0541465	0.0420945	0.022191	0.0230576	0.0333063	0.0367139	0.0329197	0.0480399	0.0435676	0.0508579	0.0278273	0.0269869
axo00104-r_at	4.37179	4.4614	4.67018	4.68229	4.72724	4.67495	4.74545	4.82482	4.86332	4.994	4.93958	4.90662	4.99561	4.95575	4.81891	4.88163	4.9563	4.91975	4.76721	4.86529	0.0501683	0.0331115	0.0229093	0.0312051	0.0459481	0.0630086	0.0339469	0.0483905	0.0263369	0.0683008	0.0376211	0.0350344	0.0439705	0.0503547	0.058676	0.0452539	0.0381483	0.0511069	0.0470447	0.0440112
axo00105-f_at	11.7119	11.637	11.6412	11.7054	11.6729	11.8294	11.8024	11.8007	11.8164	11.7937	11.9075	11.9001	11.8453	11.8267	11.7722	11.8199	11.7208	11.6839	11.7273	11.7725	0.0120578	0.01432	0.0139452	0.0124024	0.0176699	0.0102635	0.00883243	0.014429	0.0160879	0.0133201	0.0110967	0.0119748	0.0119721	0.010661	0.00711474	0.0152202	0.016619	0.0133958	0.0131723	0.0145149
axo00106-r_at	4.77931	4.77917	4.75726	4.64226	4.70074	4.9674	4.98787	5.27083	5.22051	5.1478	5.24963	5.3231	5.26123	5.27193	5.24874	5.36954	5.50185	5.42676	5.51658	5.34601	0.0689681	0.0760894	0.0774435	0.102296	0.0537287	0.0622534	0.0781089	0.0426614	0.0474465	0.0277895	0.0560961	0.0481894	0.0671689	0.0835174	0.0674997	0.0598103	0.0497547	0.0750379	0.043156	0.0614462
axo00107-r_at	5.30074	5.23775	5.29068	5.30657	5.32002	5.31853	5.30459	5.32724	5.35075	5.41628	5.71302	5.70746	5.58914	5.70366	5.60988	5.73528	5.55746	5.6182	5.67773	5.76053	0.0596656	0.0276175	0.0293815	0.0410453	0.0425721	0.0336904	0.02739	0.0322728	0.0596385	0.0429405	0.0779717	0.0643171	0.0326406	0.0770238	0.0549467	0.053201	0.0607776	0.0403786	0.0430472	0.0689006
axo00108-f_at	9.82499	9.52481	9.58844	9.84186	9.96086	9.91994	10.024	10.1995	10.1116	10.1381	9.94565	10.0295	10.0581	10.0017	10.0809	10.0257	10.076	10.1513	9.98014	9.92104	0.00883247	0.0142721	0.014313	0.01114	0.0123691	0.0210669	0.0195555	0.016413	0.0157129	0.0175062	0.00828195	0.0152157	0.0135417	0.0116799	0.0134142	0.013476	0.0178078	0.01439	0.00834498	0.0104441
axo00109-r_at	4.27165	4.2632	4.32087	4.2515	4.14869	4.04991	4.03002	4.02078	4.09022	4.04441	4.04739	4.03818	4.04901	4.09482	4.09178	4.09459	4.01328	3.92314	4.00294	4.12948	0.0651757	0.035591	0.0425273	0.0519011	0.0452551	0.0319517	0.0517539	0.023383	0.0515595	0.0543698	0.0322639	0.0278421	0.0457718	0.0298992	0.0264739	0.0297291	0.04836	0.0382534	0.0410865	0.0456
axo00110-f_at	5.96192	5.37934	5.36342	5.10417	5.07874	5.19999	5.19906	5.22642	5.38485	5.32271	5.14979	5.21996	5.50673	5.71331	5.64459	5.81447	6.39082	6.31617	6.52907	6.18591	0.129609	0.0969424	0.106999	0.0534207	0.0895677	0.0807062	0.07823	0.112839	0.0808477	0.0872448	0.088279	0.117733	0.119947	0.108765	0.10664	0.125238	0.143765	0.0966638	0.0698315	0.079965
axo00112-f_at	3.80305	3.88795	3.95552	3.92608	3.9768	4.05068	4.20459	4.12608	4.07515	4.02471	4.15122	4.12215	4.22254	3.97975	4.16723	4.03069	4.04641	4.20617	4.16857	4.16923	0.0545979	0.0347662	0.0347248	0.0388354	0.0573727	0.0534327	0.0623927	0.0265253	0.0308944	0.0412871	0.0433461	0.0424849	0.0370956	0.0256555	0.0353654	0.0429513	0.053031	0.0443781	0.0405919	0.0533431
axo00114-f_at	9.69272	9.8349	9.96501	10.0162	10.1868	10.0877	10.0152	9.95011	9.94514	9.972	10.0739	9.98602	9.95068	9.68897	9.76848	9.80923	9.87139	9.87375	9.75782	9.80733	0.0202996	0.0189707	0.0163198	0.0149	0.020999	0.0264823	0.0285445	0.0100355	0.0111629	0.0276112	0.017409	0.0141793	0.0168957	0.0306967	0.0223357	0.0164123	0.0209055	0.0227694	0.0207603	0.0138998
axo00116-f_at	4.04636	4.06568	3.91245	3.89132	3.81651	3.90363	3.83281	3.8753	3.84391	3.82826	3.85199	3.9542	3.81971	3.88694	3.79988	3.83082	3.81942	3.78065	3.73033	3.78752	0.0446477	0.0690903	0.0361814	0.0261741	0.0400705	0.0448814	0.030996	0.0284781	0.0310967	0.0275603	0.0503103	0.0338191	0.0501721	0.0569254	0.0334679	0.0261667	0.0372304	0.0312358	0.0413283	0.0395869
axo00118-f_at	6.91867	6.72817	6.91289	6.7734	6.72515	6.78025	7.01773	7.23822	7.18823	7.31721	7.27507	7.29533	7.46211	7.62947	7.56025	7.67136	7.65735	7.7157	7.79642	7.81486	0.0306138	0.036079	0.0461357	0.0503921	0.0256327	0.0361479	0.027348	0.0256956	0.0230026	0.0194601	0.0172181	0.0204943	0.0155566	0.0243673	0.0246906	0.0218094	0.0289729	0.0142527	0.00998339	0.0247918
axo00119-f_at	3.32881	3.40697	3.35743	3.35365	3.34519	3.32641	3.28989	3.22622	3.28558	3.31306	3.38845	3.43003	3.28249	3.28369	3.34117	3.32152	3.29624	3.33501	3.28532	3.33086	0.0343224	0.0522021	0.0198267	0.0450519	0.0344641	0.0387707	0.0426316	0.041983	0.02963	0.0388635	0.0265956	0.0508302	0.0375477	0.0278863	0.0334743	0.034636	0.0299169	0.044325	0.0335153	0.0426214
axo00120-f_at	8.67837	8.41318	8.30215	8.25442	8.22812	8.24771	8.41297	8.50011	8.41639	8.44006	8.50768	8.52205	8.58782	8.63751	8.67013	8.90113	8.90147	8.88168	9.12925	8.92222	0.0200957	0.0316949	0.0390788	0.0242158	0.0204681	0.0162518	0.0269194	0.0154653	0.0296207	0.038407	0.0275993	0.0170763	0.0233678	0.0214537	0.013774	0.0263704	0.0196267	0.0150279	0.031054	0.0247458
axo00121-r_at	6.64904	6.45204	5.66038	5.03537	4.94536	4.71525	4.6928	4.61402	4.51247	4.47928	4.37651	4.5232	4.28446	4.51299	4.71975	4.66258	4.85487	5.15907	6.41922	6.02178	0.0623896	0.117746	0.0574639	0.0509317	0.0638303	0.0705312	0.054103	0.0544635	0.0616405	0.0601414	0.0576305	0.0463144	0.0399422	0.0222861	0.0962097	0.094831	0.0777758	0.150486	0.134122	0.15086
axo00123-f_at	4.07613	3.97543	3.96581	3.97742	3.95077	3.84488	3.90558	3.89308	3.89579	3.90219	4.01114	3.98586	3.96121	3.96603	4.06412	4.06695	4.03999	4.016	4.04882	4.07362	0.0494917	0.037259	0.0233535	0.03594	0.0243636	0.0384332	0.0306372	0.0286737	0.0386051	0.0261623	0.0307583	0.0360492	0.0426036	0.0373181	0.0360673	0.0397653	0.0304586	0.0309123	0.0285185	0.0259394
axo00124-f_at	8.52559	8.29631	8.31414	8.48887	8.51933	8.77952	8.81506	8.75008	8.6647	8.68321	8.6109	8.65074	8.6482	8.69278	8.9374	8.52564	8.61594	8.61287	8.7551	8.62796	0.0185324	0.0121054	0.0205882	0.0199425	0.0304237	0.016086	0.0218736	0.0135659	0.0251753	0.0200563	0.0252029	0.0265882	0.0216648	0.0186797	0.0300207	0.0155772	0.0283526	0.0220551	0.0102873	0.0224412
axo00125-r_at	7.41347	7.21384	7.18894	7.20287	7.10936	6.85956	7.00289	7.08848	7.42701	7.14132	7.33125	7.28058	7.29248	7.50277	7.62159	7.75372	7.65965	7.54107	7.61324	7.32509	0.0576278	0.0560264	0.0880493	0.0634825	0.0394128	0.0799722	0.040517	0.074529	0.0358593	0.0342885	0.0333339	0.0591835	0.0572888	0.0518527	0.0761268	0.0403995	0.0597531	0.0698426	0.0478107	0.102192
axo00126-f_at	4.41576	4.48322	4.53305	4.54297	4.58941	4.57911	4.69191	4.66522	4.64994	4.6346	4.84858	4.87409	4.84244	4.83507	4.71453	4.72877	4.6802	4.74106	4.79853	4.66434	0.0539944	0.0514419	0.039282	0.0359979	0.0631735	0.0256084	0.0628345	0.0423349	0.0334536	0.02981	0.0279933	0.0436495	0.0272499	0.0360627	0.0481049	0.0590327	0.0541902	0.0329371	0.0610891	0.0515376
axo00127-f_at	6.66148	6.13666	6.13901	6.01412	5.98718	6.05596	6.13449	6.28872	6.18694	6.29038	6.22809	6.45768	6.43034	6.60019	6.6028	6.47647	6.33736	6.4867	6.4272	6.40785	0.0336459	0.0308163	0.0626504	0.053145	0.0542544	0.0495758	0.0594526	0.0406196	0.046888	0.0569449	0.0367078	0.047695	0.0464234	0.046745	0.0375649	0.0473014	0.0410198	0.044101	0.0469958	0.057084
axo00128-f_at	4.81664	4.67925	4.58117	4.68627	4.66797	4.71205	4.65538	4.90091	4.87206	4.8705	4.75387	4.70956	4.76675	4.69251	4.83007	4.64677	4.74017	4.66299	4.78484	4.79935	0.0366041	0.0582062	0.0628608	0.0521065	0.0522297	0.0409783	0.04392	0.0591767	0.0492081	0.0478914	0.0431575	0.0275837	0.0455279	0.0265957	0.0299194	0.0468692	0.0394974	0.0460765	0.0417886	0.0483999
axo00131-r_at	5.48539	4.70523	4.58414	4.89179	5.03037	4.99689	5.08427	5.24596	5.34116	5.39589	5.24861	5.4493	5.58594	5.79677	5.97708	6.06315	6.1127	6.04627	6.09782	6.09351	0.033268	0.0393465	0.0840829	0.0520128	0.063029	0.0458414	0.0333137	0.0354025	0.0431634	0.0396828	0.0533447	0.053795	0.0413152	0.0233929	0.0441095	0.0334112	0.056323	0.0460929	0.0479779	0.0572857
axo00132-f_at	4.38353	4.18738	4.04761	4.30109	4.29959	4.2095	4.30135	4.24545	4.30728	4.42129	4.28225	4.47514	4.44611	4.50552	4.55421	4.56397	4.552	4.39164	4.46393	4.51475	0.0514377	0.0394406	0.0550918	0.0181366	0.0623761	0.0476341	0.0358191	0.0378613	0.0552342	0.0365222	0.041793	0.0370448	0.0437732	0.0416359	0.0487467	0.0402348	0.0338373	0.019568	0.0346736	0.0479554
axo00137-f_at	6.70221	6.10824	6.10613	6.39323	6.4735	6.41336	6.40692	6.47609	6.46593	6.53249	6.53197	6.6243	6.59529	6.66815	6.71241	6.74051	6.86063	6.66979	6.75762	6.81048	0.0250932	0.0457774	0.0330593	0.0239461	0.0201122	0.0326004	0.0386423	0.0179468	0.032024	0.0363392	0.0145475	0.0241448	0.0273207	0.0346719	0.0200486	0.0332871	0.0406342	0.0264315	0.0236219	0.0280039
axo00140-f_at	5.54566	5.18913	5.27761	5.16173	5.49473	5.33625	5.33114	5.11053	5.36202	5.4625	4.98512	5.28614	5.32482	5.55105	5.60335	5.5917	5.53244	5.71466	5.8136	5.8613	0.0445796	0.0637661	0.101472	0.0890611	0.0452891	0.105827	0.0678971	0.0927689	0.122366	0.0698485	0.065999	0.0804402	0.0705395	0.0783267	0.0870396	0.0723832	0.0904574	0.0545761	0.0702213	0.04904
axo00141-f_at	6.67065	6.38547	6.47896	6.66656	6.64523	6.60981	6.60092	6.60464	6.63573	6.71982	6.86909	6.82856	6.88432	6.78424	6.75071	6.82123	6.85979	6.83076	6.79263	6.8774	0.023512	0.0244538	0.0443048	0.0288822	0.0456755	0.0370811	0.0265804	0.03945	0.024094	0.0311098	0.0268195	0.0229371	0.0165035	0.0280013	0.0275859	0.0365683	0.0235876	0.0221037	0.0336198	0.0195815
axo00142-r_at	4.46845	4.39774	4.1949	4.28594	4.30064	4.30697	4.18881	4.39185	4.24556	4.37758	4.39056	4.33932	4.43259	4.51499	4.77522	4.62744	4.73034	4.59244	4.58804	4.67319	0.104323	0.0531964	0.0691803	0.0314298	0.0340526	0.0613969	0.0502805	0.0620566	0.0460685	0.0715281	0.0461265	0.0408196	0.0701142	0.0732792	0.0791381	0.0818087	0.0462199	0.0475285	0.0807956	0.0552958
axo00144-f_at	3.33877	3.39243	3.40299	3.43102	3.39606	3.45281	3.34733	3.3987	3.38989	3.37624	3.38543	3.43842	3.42674	3.41692	3.514	3.37631	3.41063	3.40498	3.46887	3.47728	0.0374824	0.0425681	0.0268761	0.0473085	0.0262496	0.040364	0.0427691	0.0361189	0.0395028	0.0356031	0.0366251	0.0508454	0.0458993	0.0321531	0.0386408	0.0521741	0.0343929	0.0176736	0.0425946	0.0435524
axo00145-f_at	5.88741	5.60937	5.63467	5.83931	5.77999	5.67308	5.66613	5.5495	5.59041	5.59101	5.66782	5.93978	5.72526	5.82574	5.93211	5.95024	5.89734	6.14384	5.80868	5.91408	0.0211483	0.0403978	0.0389552	0.0251172	0.0523141	0.0340028	0.0376224	0.0417697	0.0419475	0.0425846	0.0219015	0.0566194	0.0426945	0.0387408	0.0135153	0.0493164	0.0432902	0.0377573	0.0388359	0.0455641
axo00146-f_at	4.05916	4.10934	4.10965	4.16276	4.0514	4.2914	4.27842	4.15513	4.2069	4.15275	4.3465	4.2227	4.18958	4.24948	4.06289	4.00479	4.03573	3.89074	3.92228	3.98501	0.0456345	0.0635427	0.0706533	0.041743	0.0238343	0.0622002	0.0436117	0.0506081	0.0356671	0.0448279	0.0535358	0.0522589	0.0420756	0.0769859	0.0277904	0.048713	0.0568779	0.0465417	0.0489555	0.0323746
axo00148-f_at	3.77807	4.02957	3.90377	3.87173	3.94536	3.99115	3.74595	3.74944	3.77432	3.75385	3.90303	3.86268	3.88929	3.71477	3.80393	3.74784	3.88256	3.75659	3.77322	3.75024	0.0336222	0.0485521	0.0465244	0.0570701	0.0274357	0.106816	0.0534541	0.0311065	0.0668254	0.0412013	0.0322691	0.0499595	0.0561127	0.04216	0.0354009	0.0568321	0.0332971	0.0181623	0.0342813	0.0321094
axo00149-r_at	6.83149	6.71173	6.55738	6.33667	6.36251	6.45783	6.51994	6.63722	6.63194	6.64599	6.41422	6.46636	6.9155	6.6916	6.69416	6.40674	6.72643	6.83839	6.75657	6.6437	0.0521309	0.0414681	0.0615193	0.0647372	0.0715434	0.0706173	0.0837356	0.0686733	0.0524926	0.0902721	0.0878239	0.0815111	0.0762913	0.0539892	0.09475	0.090079	0.0754235	0.0852854	0.104548	0.0939683
axo00150-r_at	10.9368	10.3033	9.86813	9.02636	8.85608	8.16382	7.92744	7.62852	6.64564	5.79389	5.03168	4.83559	4.79197	4.76258	4.57836	4.65036	4.69037	4.6162	4.76559	4.94116	0.101314	0.105381	0.0796248	0.10413	0.103515	0.182423	0.102498	0.13754	0.184511	0.120201	0.106207	0.112925	0.0937113	0.0436913	0.0556424	0.0671372	0.0491118	0.0546649	0.0504712	0.0457723
axo00151-r_at	4.68547	4.28316	4.09063	3.95157	3.79063	3.92864	3.84053	3.74532	3.72576	3.72517	3.67692	3.71261	3.61959	3.66696	3.61966	3.64009	3.71923	3.64677	3.70939	3.69024	0.178092	0.114359	0.0888813	0.0738141	0.0598299	0.0675882	0.0378029	0.0461721	0.0383238	0.0585993	0.0424115	0.0295072	0.0541832	0.0621195	0.0448572	0.0409237	0.0289492	0.0300968	0.0375495	0.038875
axo00152-r_at	3.73203	3.85874	3.82739	3.86264	3.79483	3.70669	3.65555	3.75617	3.69667	3.77813	3.7811	3.77269	3.71958	3.8273	3.71221	3.6932	3.79374	3.67589	3.70141	3.75232	0.0314493	0.0389536	0.0446932	0.0486791	0.0308332	0.0402742	0.0205247	0.0275113	0.0497913	0.0538275	0.0256904	0.0267643	0.0396106	0.0537253	0.0503237	0.0395388	0.0431058	0.0531477	0.0367068	0.0559834
axo00153-f_at	4.01439	3.98321	4.1699	4.0915	4.09884	4.05637	4.04772	4.07312	4.097	3.99692	4.10633	4.09806	4.06738	4.12939	4.08503	4.1795	4.03964	4.13189	4.19606	4.10685	0.0407321	0.0319663	0.0471158	0.0676142	0.0448624	0.0454822	0.0511553	0.0506515	0.0278031	0.0339005	0.0522801	0.0259617	0.0443814	0.0222753	0.0380391	0.0478048	0.0301632	0.0354246	0.0464323	0.0519536
axo00155-f_at	5.45069	5.46487	5.64646	5.6751	5.79899	5.68338	5.63305	5.67052	5.71807	5.8405	5.74462	5.65488	5.6376	5.65278	5.6555	5.61848	5.65115	5.72699	5.54988	5.46355	0.0369334	0.0303679	0.0481252	0.0305368	0.0430982	0.0370234	0.0228559	0.0334472	0.0231924	0.0459675	0.034363	0.0338591	0.0466887	0.0377567	0.0173301	0.0276399	0.0341989	0.0416994	0.0292895	0.0483116
axo00158-f_at	8.28319	8.14167	8.04305	8.09869	8.07326	8.11246	8.20525	8.29366	8.17612	8.27564	8.13477	8.29458	8.30697	8.38287	8.50289	8.45544	8.48539	8.5797	8.58865	8.63083	0.0265776	0.0215456	0.0154541	0.0196383	0.0197251	0.0156708	0.0189658	0.0163779	0.0215669	0.0157114	0.0236743	0.0155498	0.0193588	0.0218192	0.0139772	0.0086721	0.0228175	0.0229034	0.0113185	0.0210694
axo00159-f_at	4.46091	4.49501	4.5152	4.64467	4.55199	4.81459	4.7509	4.74437	4.55594	4.69942	4.78654	4.70794	4.7239	4.62293	4.55618	4.67506	4.72051	4.6725	4.55179	4.5002	0.0520218	0.0360909	0.0534105	0.0317675	0.0553224	0.0651516	0.0760941	0.0654215	0.0479945	0.0443834	0.0332315	0.0226378	0.034368	0.029331	0.0205695	0.028992	0.0388837	0.0334264	0.0316294	0.0409335
axo00160-f_at	5.59089	5.79378	5.82687	5.91479	5.90661	6.03183	6.04404	5.95563	5.91859	5.97461	6.11299	5.99375	5.94101	6.00906	5.94983	5.88855	5.83283	6.12905	6.03483	5.92191	0.0451395	0.031688	0.0439709	0.0259085	0.0436971	0.0257637	0.0114714	0.0282763	0.0388544	0.0366767	0.0302348	0.0320497	0.0530423	0.0215731	0.022014	0.0347433	0.0290574	0.0132606	0.0194333	0.0162083
axo00161-f_at	10.3989	10.6291	11.0126	11.2028	11.1967	11.2751	11.076	10.9953	11.048	11.6086	11.6338	11.5639	11.4102	11.4975	11.3487	11.4802	11.2833	11.6387	11.6138	11.5217	0.035591	0.0380883	0.0239097	0.0199795	0.0261175	0.0291341	0.0370832	0.05252	0.0384164	0.0232353	0.0264335	0.0358692	0.0169624	0.0180476	0.0264111	0.0240129	0.0256837	0.0231036	0.0205332	0.0302012
axo00162-f_at	5.15163	5.16517	5.53662	5.54618	5.32017	5.27088	5.38261	5.33802	5.26236	5.30204	5.23405	5.31222	5.34255	5.47314	5.31416	5.28455	5.26749	5.5609	5.49716	5.64333	0.0558908	0.059633	0.0837951	0.062151	0.0848776	0.103455	0.058541	0.0576286	0.0504476	0.0393901	0.0587434	0.0623025	0.0556421	0.0670083	0.0322303	0.0616026	0.0726978	0.0381467	0.0546918	0.0472195
axo00163-f_at	4.17994	4.35312	4.13837	4.16111	4.23015	4.14482	4.16026	4.14121	4.21342	4.17264	4.21706	4.19047	4.19817	4.11287	4.25842	4.21312	4.12167	4.20045	4.19749	4.34405	0.0525974	0.094101	0.0350648	0.0496501	0.0679357	0.0285049	0.0553947	0.0339937	0.0230893	0.0415169	0.0352804	0.0401332	0.0263764	0.0312788	0.0478301	0.038829	0.0291394	0.0600189	0.0343399	0.0518357
axo00164-f_at	4.10836	4.08138	3.98008	4.17749	4.12827	4.11123	4.06828	4.07705	4.02699	4.10932	4.02976	4.06019	4.10745	4.08452	4.1733	4.16219	4.16325	4.1014	4.12378	4.25638	0.0401112	0.0515995	0.0296552	0.0319342	0.0352483	0.0454884	0.0302675	0.0337143	0.0194724	0.027382	0.0405273	0.0304528	0.033545	0.0260401	0.0164188	0.0202406	0.0300612	0.0262505	0.0431171	0.0359181
axo00165-f_at	3.3009	3.47465	3.45138	3.47011	3.50001	3.48905	3.45802	3.44213	3.42104	3.41753	3.53266	3.49069	3.55102	3.49345	3.47485	3.39585	3.49048	3.45826	3.52867	3.52896	0.0318714	0.0325441	0.0614138	0.0543201	0.0331941	0.0555797	0.0359407	0.030674	0.0370598	0.0423942	0.0393964	0.0276398	0.0585468	0.0383344	0.0377434	0.0373094	0.0222818	0.0498407	0.0532683	0.0463124
axo00166-f_at	3.74897	3.7465	3.79517	3.87348	3.78884	3.84182	3.83655	3.84258	3.89853	3.86519	3.87341	3.85185	3.87928	3.89096	3.88612	3.92419	3.82894	3.83969	3.84473	3.85112	0.0334974	0.042362	0.0289705	0.0362182	0.0233765	0.0330506	0.0411389	0.0300136	0.0247129	0.0338367	0.0336476	0.0292015	0.0386634	0.0383136	0.031314	0.0311441	0.049463	0.0605379	0.0391687	0.0327603
axo00167-f_at	7.61273	7.50393	7.51882	7.34542	7.47167	7.57849	7.60234	7.78614	7.91246	7.90962	7.98812	7.78208	7.93119	7.90548	7.95249	8.0139	7.97913	7.87916	7.98855	7.9392	0.0231526	0.0228156	0.0333369	0.0234401	0.0127503	0.0252026	0.00805617	0.0253548	0.0184871	0.0335133	0.0161122	0.0155592	0.0271692	0.0159046	0.0143092	0.0202975	0.0137556	0.0226164	0.0198813	0.0287736
axo00168-r_at	3.58848	3.58743	3.64515	3.63469	3.65638	3.5992	3.61281	3.56839	3.55967	3.62736	3.5314	3.59951	3.63173	3.53247	3.5424	3.64398	3.57706	3.56951	3.59685	3.64972	0.0345437	0.0355363	0.037487	0.0379972	0.0436706	0.0175853	0.0215237	0.0512157	0.0213123	0.0331327	0.0302438	0.0405613	0.0361052	0.0322357	0.0226988	0.0355817	0.0273729	0.0242961	0.0248148	0.0247856
axo00170-r_at	7.04891	6.96722	7.4118	7.7444	7.80367	7.766	7.733	8.08599	8.12413	8.00915	7.89312	7.8103	7.6772	7.40092	7.36119	7.39277	7.32447	7.35045	7.58941	7.39984	0.0772886	0.0520827	0.0537747	0.0600776	0.0556781	0.045877	0.0524417	0.0629703	0.034235	0.033023	0.0463634	0.0576703	0.0459782	0.0556663	0.0305441	0.0843489	0.0619733	0.0535079	0.0443809	0.0598717
axo00171-f_at	3.93936	3.95924	3.84888	3.94838	3.93084	3.82295	3.91531	3.88991	3.89803	3.8965	4.01152	3.93717	3.9462	3.92962	3.92334	3.81587	3.94626	3.94215	3.90199	3.93589	0.0474145	0.0479143	0.027987	0.0411931	0.0527756	0.0429445	0.0363337	0.0346703	0.0268331	0.0485795	0.0382636	0.03969	0.0464186	0.0449272	0.0267726	0.0489916	0.0346193	0.0461206	0.0286706	0.0293738
axo00172-f_at	4.27214	4.27176	4.30694	4.42574	4.32981	4.16944	4.19107	4.19412	4.23016	4.19343	4.2382	4.24718	4.31158	4.19916	4.29028	4.34117	4.32706	4.33883	4.25547	4.28435	0.059208	0.0525588	0.0670527	0.057647	0.0376942	0.0527338	0.0408584	0.0486919	0.0445648	0.0490082	0.04434	0.0397773	0.038542	0.0573873	0.0425734	0.0617842	0.0306468	0.0352116	0.0282926	0.0414446
axo00173-f_at	7.5182	7.50389	8.83767	9.0229	9.06626	9.19169	9.16091	9.19808	9.12014	9.12403	9.43686	9.08736	8.76395	8.78462	8.86848	8.95731	8.96982	8.95257	8.94997	9.05007	0.0609217	0.0507502	0.0349997	0.0317709	0.0404709	0.0331309	0.0392734	0.0269837	0.0289573	0.0261887	0.041742	0.0464953	0.0389035	0.0414386	0.0325895	0.0200965	0.0377028	0.0114951	0.01338	0.018015
axo00175-f_at	4.61294	4.81562	4.89778	4.83033	4.96412	4.9728	5.03176	5.0652	5.11449	5.12897	5.17734	5.1482	5.29104	5.25648	5.2388	5.18616	5.04048	5.33213	5.20175	5.04816	0.0432215	0.0456721	0.0364149	0.0510312	0.0466382	0.0369191	0.0542678	0.0424648	0.0370721	0.0315299	0.0402069	0.0325129	0.0524002	0.0625561	0.0471182	0.0472524	0.0312527	0.0531472	0.0490274	0.0499184
axo00176-f_at	4.21537	4.26406	4.2605	4.285	4.25414	4.24722	4.14432	4.14905	4.10156	4.10938	4.11233	4.05378	4.05443	4.15369	4.0723	4.04226	4.04518	3.97222	4.08166	4.06608	0.0437879	0.0567471	0.040365	0.047058	0.0443255	0.0449793	0.0385259	0.0327663	0.0244765	0.0482617	0.0442765	0.037613	0.0420868	0.0374919	0.0283146	0.0651386	0.0410988	0.049541	0.029493	0.0369753
axo00177-f_at	4.07432	4.1178	4.24467	4.15249	4.20651	4.0594	4.07414	3.9639	3.97394	4.07011	4.04216	4.05703	4.03974	3.90799	4.01818	3.89997	3.8816	4.04896	3.99704	3.99207	0.0698708	0.0666885	0.0478512	0.0397121	0.05053	0.0461868	0.0383176	0.0475403	0.0443012	0.0351108	0.0563468	0.0473612	0.073579	0.0712114	0.0308355	0.0352235	0.0212149	0.0455483	0.0427125	0.0236379
axo00178-f_at	4.43034	4.43451	4.50948	4.51688	4.38992	4.43833	4.48729	4.44682	4.40725	4.41758	4.49753	4.48844	4.4187	4.39119	4.4492	4.44535	4.54411	4.48399	4.50628	4.53755	0.0348154	0.0381541	0.0299291	0.0169623	0.0207798	0.031509	0.0458727	0.0308013	0.0232567	0.0410304	0.0367912	0.0443337	0.0361078	0.0251346	0.0318821	0.0289712	0.0372038	0.0347015	0.0371456	0.0179269
axo00180-f_at	9.03969	10.7384	11.6097	11.3624	10.9561	10.842	10.6403	10.7037	10.5169	11.1081	11.0446	10.9579	10.6338	10.564	10.2786	10.2135	10.3034	10.69	10.4484	10.0981	0.0528306	0.0466774	0.021908	0.015765	0.0349802	0.0532011	0.0488863	0.040746	0.0429174	0.0344818	0.0303075	0.0296941	0.0587301	0.0396044	0.029261	0.0423409	0.0324803	0.0206706	0.0209381	0.0405593
axo00182-r_at	11.1561	11.3301	11.5024	11.7385	11.9047	11.9891	12.0403	12.0945	12.0073	12.0614	12.069	11.9311	12.0289	12.076	12.0244	11.957	11.9176	12.1143	12.2344	12.051	0.0233491	0.0294851	0.022163	0.0167925	0.0189155	0.0186296	0.0181631	0.0162629	0.0147396	0.0130012	0.019027	0.018558	0.0261622	0.0143264	0.0164099	0.0131328	0.0207052	0.0158422	0.0144696	0.0159513
axo00188-r_at	8.57757	8.14288	8.0538	7.89006	7.59822	7.16146	7.58082	7.05097	7.35867	7.14819	6.75611	7.42376	7.32731	7.35062	6.81728	7.54226	7.32432	6.86082	7.16058	7.27682	0.059581	0.12322	0.102326	0.0984919	0.0950556	0.13123	0.0917454	0.111249	0.119733	0.113342	0.139371	0.115235	0.108686	0.0859719	0.1426	0.10102	0.0939039	0.16925	0.14216	0.121468
axo00189-r_at	7.38313	7.55698	7.69659	7.79595	7.95559	8.13693	7.77277	8.14595	8.37853	8.44515	8.5386	8.70204	8.61761	8.59912	8.18066	8.34329	8.19209	8.1285	8.28453	8.4302	0.0571939	0.0330324	0.0456199	0.0613303	0.05202	0.0410603	0.0507848	0.0349006	0.0323736	0.0377688	0.0411757	0.0300459	0.0414557	0.0414291	0.0389649	0.0486145	0.0478137	0.0293564	0.0434344	0.0430302
axo00190-f_at	4.60928	4.64693	4.5431	4.613	4.53004	4.65274	4.69145	4.70526	4.73881	4.7225	4.71852	4.7424	4.72261	4.72466	4.86911	4.71427	4.69542	4.60062	4.59321	4.67601	0.0295155	0.0344073	0.0335776	0.045958	0.0409327	0.0354636	0.0506941	0.0646576	0.0292917	0.0684365	0.06372	0.0501417	0.0479903	0.0641995	0.0360885	0.0353501	0.0350889	0.0406345	0.0243125	0.0393288
axo00191-f_at	3.95185	4.06371	4.01427	4.10568	3.94666	4.12203	4.01944	3.92333	3.98738	4.08559	4.04628	4.04043	4.01972	3.96962	4.01551	4.01765	3.99084	3.99075	3.88959	3.99031	0.0364187	0.0519856	0.0408885	0.0436963	0.0254487	0.0336415	0.0571642	0.0278867	0.032348	0.0310777	0.0356185	0.0338993	0.0467992	0.0365574	0.0408527	0.043164	0.0321584	0.0546536	0.039443	0.0237464
axo00192-r_at	6.59507	7.32472	7.12075	7.30077	6.8527	7.60942	8.06899	7.61019	7.72661	7.95112	7.51267	7.53266	7.81424	7.758	7.43776	7.7375	7.89483	7.0761	8.3427	8.24255	0.233467	0.148536	0.198899	0.156695	0.252488	0.172605	0.0548652	0.166385	0.160749	0.0637337	0.166742	0.173869	0.178719	0.179352	0.232966	0.179808	0.175105	0.264545	0.0611609	0.0505021
axo00193-r_at	9.46417	9.17085	9.26821	9.24974	9.25652	9.22501	9.26647	9.35984	9.5319	9.60502	9.67458	9.67143	9.63583	9.75945	9.75746	9.83334	9.92797	9.89125	9.90653	9.84682	0.0202629	0.0194572	0.0183125	0.0196238	0.0132573	0.0156703	0.0144672	0.0167139	0.00945517	0.018054	0.0106996	0.0198701	0.00859118	0.00662376	0.00662286	0.0155089	0.0173219	0.017049	0.0153482	0.0127261
axo00194-f_at	9.34263	9.30451	9.31327	9.28488	9.4345	9.68415	9.629	9.64011	9.77662	9.79784	9.75684	9.84079	9.76556	9.65012	9.72959	9.70029	9.58458	9.70493	9.70192	9.75127	0.0172706	0.0167592	0.0146569	0.0144825	0.0103337	0.0132107	0.0191423	0.0103948	0.013536	0.0185767	0.00841373	0.0174813	0.0150492	0.0134259	0.010789	0.0192763	0.0231233	0.0152474	0.0109996	0.0182928
axo00195-f_at	3.16794	3.25171	3.16577	3.12795	3.12841	3.11934	3.15949	3.14923	3.2174	3.17728	3.22255	3.25238	3.273	3.28583	3.38592	3.22915	3.32013	3.22665	3.40922	3.38401	0.0302258	0.0347965	0.0340261	0.0265044	0.0414831	0.0346675	0.0315281	0.031097	0.0494317	0.0510937	0.0389012	0.0429707	0.0225137	0.0414394	0.0460603	0.044689	0.0227991	0.0444313	0.0610404	0.0588727
axo00196-r_at	6.5103	6.32182	6.33746	6.21345	6.59702	6.49587	6.66725	6.64958	6.60566	6.83052	6.56559	6.77796	7.00907	7.16764	7.38452	7.10873	7.30453	7.14686	7.2272	7.1916	0.0345794	0.0708864	0.0894533	0.0722969	0.0435631	0.0424637	0.0477265	0.066026	0.0518148	0.0548119	0.0304277	0.0590919	0.0262367	0.04453	0.0478478	0.028868	0.0362232	0.0280593	0.0214046	0.0167227
axo00197-r_at	6.08982	6.2199	6.33104	6.51106	6.95807	6.96147	6.55426	6.53181	6.65153	6.32133	6.48244	6.05253	6.21182	6.26837	6.01109	5.98523	6.03368	5.98125	5.88013	5.93814	0.060333	0.104695	0.100341	0.0544275	0.112907	0.125131	0.0672585	0.0777502	0.0676568	0.052277	0.104899	0.0851319	0.126931	0.0856425	0.0579888	0.0840674	0.130583	0.106844	0.0656726	0.0694055
axo00199-f_at	4.93157	4.92103	4.91215	4.85736	4.94524	4.88465	4.91038	4.73417	4.79391	4.88256	4.75869	4.93355	4.79946	4.85943	4.88215	4.87683	4.77931	4.72386	4.93141	4.94466	0.0410449	0.0397616	0.0423944	0.0464665	0.0357727	0.0255801	0.0287144	0.0391289	0.0341475	0.0340533	0.0366514	0.0325985	0.0562487	0.0551607	0.0239209	0.0302441	0.040776	0.0334077	0.0241695	0.0391932
axo00202-r_at	9.53499	9.4558	9.46882	9.47226	9.37717	9.37802	9.47448	9.47523	9.58428	9.56136	9.67377	9.80159	9.71796	9.84657	9.88498	9.85805	9.97494	9.93892	10.0286	9.98938	0.0130589	0.0137745	0.0237869	0.012559	0.0173474	0.0186095	0.0134209	0.00944561	0.017573	0.0158281	0.00939113	0.0157534	0.0137969	0.0141093	0.0074244	0.0135522	0.0127182	0.0108649	0.0134112	0.0167346
axo00203-f_at	4.35714	4.29899	4.14732	4.3894	4.35614	3.86085	3.86612	3.83242	3.86677	3.88551	3.98429	3.94992	3.90173	3.87132	3.92186	3.84876	3.90854	3.92072	3.99458	3.9278	0.0555575	0.0684174	0.088608	0.0859997	0.0694329	0.0336428	0.0330035	0.0436591	0.0484313	0.0387571	0.0400354	0.0394363	0.0439922	0.0361227	0.0241857	0.0392975	0.0349253	0.0388746	0.0576033	0.0199033
axo00205-f_at	4.65728	4.68607	4.63725	4.65515	4.68063	4.69454	4.87952	4.78824	4.81388	4.80913	4.8122	4.89336	5.01969	4.90947	5.00317	5.10126	5.04185	4.90069	5.0166	4.97666	0.04064	0.0523933	0.0330837	0.0316069	0.0275182	0.032667	0.0333849	0.0195119	0.0435665	0.0330598	0.0538126	0.0315801	0.0313095	0.0433149	0.0300843	0.0303154	0.0403816	0.0337021	0.0277875	0.0377716
axo00207-f_at	4.38223	4.28338	4.27126	4.25103	4.23939	4.11534	4.18975	4.10438	4.13109	4.04582	4.10305	4.17338	4.1327	4.08382	4.12301	4.18223	4.06174	4.14571	4.08354	4.14332	0.0506992	0.0272763	0.0351698	0.0248588	0.0476618	0.0229633	0.027242	0.0240772	0.0336489	0.0297016	0.0385605	0.0335568	0.024628	0.0270169	0.036217	0.0399551	0.0387971	0.0353563	0.039749	0.0394273
axo00208-f_at	9.06269	8.75325	8.896	8.88309	8.78247	8.83886	8.85011	9.05659	8.98427	9.05358	9.05966	9.15498	8.80793	8.91912	9.36996	9.14446	9.12773	9.26735	9.18945	9.15028	0.0750271	0.0868663	0.0629484	0.0521821	0.0368551	0.0260965	0.0361138	0.0424615	0.0593771	0.045004	0.0446495	0.0385032	0.052897	0.0401172	0.0191801	0.036143	0.0493552	0.0445102	0.0359437	0.0365507
axo00209-f_at	7.88034	7.75729	7.53131	7.69299	7.70856	7.80774	7.75359	7.76669	7.70232	7.7887	7.82214	7.94856	7.92352	8.01115	8.08921	8.17172	8.14472	8.1968	8.11844	8.04852	0.0156651	0.0213057	0.0325554	0.01592	0.0277328	0.0240613	0.0177582	0.0197576	0.0171781	0.0134232	0.0200395	0.014404	0.0149907	0.0085523	0.0113892	0.0133259	0.0123743	0.0125099	0.0182813	0.0174964
axo00211-f_at	4.65961	4.89857	4.54816	4.60587	4.59408	4.61582	4.60456	4.45414	4.42997	4.37852	4.44729	4.42991	4.47568	4.3928	4.32327	4.24628	4.2263	4.24957	4.27565	4.32683	0.0462726	0.0612466	0.0549348	0.0381925	0.0359855	0.0276173	0.0554353	0.0299128	0.0427425	0.0424348	0.044655	0.0338124	0.0274608	0.0370901	0.0381319	0.0441331	0.0363726	0.0481934	0.0496288	0.0431381
axo00212-f_at	3.46062	3.51698	3.61492	3.53142	3.46809	3.54158	3.47699	3.44875	3.55566	3.52321	3.52229	3.55281	3.63152	3.58286	3.72844	3.67055	3.70008	3.80489	3.76605	3.82767	0.0360524	0.0387759	0.0461756	0.0446162	0.0494935	0.0373937	0.0355176	0.0332102	0.0483366	0.029502	0.0352814	0.0290736	0.0440914	0.0371781	0.0521263	0.0592562	0.0649624	0.0582666	0.0547895	0.0533752
axo00213-f_at	5.506	5.6912	5.84826	5.9774	5.91512	5.66156	5.71042	5.70672	5.57232	5.58588	5.70607	5.58128	5.51187	5.42804	5.47296	5.47967	5.38966	5.45765	5.5977	5.54865	0.0385094	0.0262722	0.0476067	0.0362774	0.0508977	0.0257445	0.0338423	0.0381278	0.0361439	0.0392011	0.0289477	0.0241766	0.0312175	0.0389526	0.0404784	0.031688	0.0315403	0.0261258	0.0222187	0.0280924
axo00214-f_at	3.34141	3.35083	3.44152	3.39098	3.30835	3.31871	3.32131	3.35009	3.40239	3.37075	3.34061	3.39627	3.36218	3.41015	3.44746	3.32731	3.39352	3.41079	3.49128	3.38173	0.0340617	0.0381585	0.0520127	0.0601921	0.0522835	0.0342737	0.0327878	0.0453519	0.0512065	0.0361384	0.0502544	0.0286055	0.0225039	0.0471242	0.0298005	0.0306723	0.0426521	0.0403087	0.0304046	0.0499961
axo00215-r_at	11.5389	11.5371	11.6925	11.6654	11.7221	11.3031	11.3564	11.0552	11.1984	10.8368	10.9026	10.5403	10.5883	10.4536	10.0433	10.0764	10.0346	9.90241	9.44522	9.82857	0.027056	0.0436792	0.0251056	0.0273342	0.0287402	0.0344551	0.0344422	0.0344883	0.0362691	0.0297097	0.0569842	0.0635805	0.0445262	0.0476903	0.0708678	0.0788829	0.0575065	0.0675697	0.0886048	0.0288623
axo00216-f_at	8.5166	8.26907	8.28263	8.29768	8.33085	8.26852	8.2363	8.19048	8.10782	8.04939	7.94312	8.14997	8.20689	8.25035	8.23566	8.32512	8.27305	8.32357	8.26875	8.33524	0.0207411	0.0140851	0.0325959	0.0228663	0.0115622	0.0261768	0.0389666	0.0398677	0.0309657	0.0391464	0.0367625	0.0271904	0.024471	0.0190966	0.0292925	0.0186105	0.0206669	0.0171659	0.0139932	0.0204555
axo00217-f_at	4.3424	4.37096	4.48203	4.45581	4.52278	4.54748	4.48872	4.5687	4.54743	4.64411	4.7486	4.75093	4.78122	4.85927	4.62673	4.82869	4.89812	4.8088	4.96214	4.80271	0.0657284	0.0519685	0.0598635	0.0349576	0.0392836	0.0640776	0.0366381	0.0757283	0.0842038	0.0784408	0.0427351	0.0701702	0.0618025	0.0590131	0.0560407	0.0781776	0.0424871	0.06576	0.0713703	0.07277
axo00218-f_at	5.25874	5.21882	5.34534	5.23303	5.22951	5.13175	5.11465	5.2954	5.34768	5.4726	5.45426	5.41334	5.50856	5.53438	5.45396	5.4754	5.51619	5.63362	5.73022	5.69915	0.0300573	0.0410413	0.0377917	0.0373669	0.0533584	0.0375293	0.0249958	0.0285927	0.0308724	0.0254976	0.0403657	0.0326723	0.037592	0.0263731	0.0321109	0.0395699	0.0428605	0.0329727	0.0271436	0.0495231
axo00220-f_at	5.2078	5.23809	5.28499	5.23027	5.11009	5.07678	5.27197	5.33814	5.27371	5.20256	5.29916	5.2982	5.37386	5.4034	5.43304	5.3546	5.22715	5.45519	5.38666	5.53227	0.0449424	0.0466371	0.0542469	0.0455875	0.0518895	0.0524931	0.0171565	0.0391856	0.0352704	0.0261126	0.0458811	0.0207866	0.0282298	0.0528529	0.0354808	0.0524003	0.0436116	0.0320426	0.0517805	0.0173873
axo00221-f_at	9.33153	9.3356	9.32822	9.3392	9.46761	9.29761	9.27471	9.36675	9.42283	9.49061	9.51794	9.43014	9.4305	9.4155	9.38028	9.32394	9.27107	9.20237	9.25454	9.35793	0.0181657	0.0156461	0.0164934	0.0154944	0.013889	0.0156061	0.02519	0.0229762	0.0151387	0.0125971	0.0156878	0.0113695	0.0120514	0.0147984	0.0106113	0.0189038	0.011742	0.00934315	0.00835578	0.00999691
axo00222-f_at	14.1572	13.9134	13.6292	13.4883	13.4935	13.1787	13.0639	12.7358	12.3394	12.0963	11.8356	11.8802	11.444	11.3913	11.1826	11.1625	11.2397	11.3609	11.535	11.4759	0.0109373	0.0188771	0.0356989	0.0254681	0.0243065	0.0209117	0.0297134	0.0394317	0.0321348	0.0365952	0.0217561	0.0332806	0.0575641	0.0296862	0.0185257	0.0139841	0.014008	0.0168784	0.0197868	0.0186852
axo00223-f_at	6.56623	6.8633	6.77252	6.81519	6.88517	6.85441	6.79595	6.67679	6.66414	6.77081	6.82566	6.71477	6.75429	6.80921	6.68306	6.71445	6.65116	6.75272	6.57253	6.48538	0.0437959	0.0305214	0.0369399	0.0409728	0.0244452	0.030717	0.0132227	0.0374867	0.0302239	0.0260031	0.0161654	0.0409649	0.0244608	0.0300919	0.0225392	0.0328925	0.0439625	0.041955	0.0423625	0.0352042
axo00227-f_at	6.85637	6.91313	6.73647	6.85671	6.83133	6.75625	6.78284	6.77577	6.71855	6.77743	6.92374	6.90125	6.8904	6.82829	6.70388	6.74692	6.75152	6.71943	6.69621	6.72717	0.0247057	0.0300234	0.0468389	0.0254813	0.029381	0.0387185	0.0247933	0.0324385	0.0285558	0.0335602	0.0232902	0.0246576	0.0174525	0.0165109	0.0195199	0.0334243	0.026434	0.0301661	0.0264364	0.0242146
axo00228-f_at	3.85378	3.88858	3.86994	3.86979	3.76317	3.84046	3.71568	3.71974	3.74418	3.73706	3.78031	3.87697	3.7792	3.84246	3.82864	3.87014	3.8777	3.8728	3.90127	3.81163	0.0207105	0.0278987	0.0468653	0.0739283	0.0428837	0.0295911	0.0263341	0.0421549	0.0351607	0.0494589	0.0346206	0.023559	0.0288151	0.0350161	0.0166868	0.0645599	0.0466601	0.0441385	0.0535504	0.0482939
axo00231-f_at	7.14446	7.26638	7.2244	6.94614	6.8825	6.60452	6.80162	7.29257	7.49146	7.51429	7.75535	7.73606	7.5778	7.62973	7.40769	7.27328	7.22277	7.16331	7.66434	7.69128	0.0327431	0.0199283	0.0371441	0.0231884	0.0429363	0.0548262	0.0573011	0.0990524	0.0636712	0.0259906	0.0382079	0.0290675	0.0302322	0.041196	0.0407429	0.0695428	0.0628089	0.0377061	0.0424168	0.0397052
axo00233-f_at	5.77534	5.8736	5.7903	5.71425	5.16258	5.01715	4.8305	4.86218	4.57129	4.65495	4.66747	4.95876	4.75502	4.91511	5.00037	5.03107	5.09545	5.20537	5.03683	5.17358	0.0557205	0.0713754	0.0507114	0.0407527	0.0727988	0.062352	0.0664056	0.0637273	0.0586235	0.0380789	0.0580927	0.105108	0.0710093	0.0666942	0.0513639	0.0893039	0.0945157	0.0849525	0.0616665	0.0718673
axo00234-r_at	7.66893	8.21477	8.99239	9.16824	9.49409	8.8842	8.68453	8.53315	8.5616	8.34387	8.23713	7.74258	7.58844	7.13329	7.22784	7.27062	7.40527	7.58005	7.31304	7.62492	0.0681053	0.0627774	0.0611985	0.0433699	0.0326626	0.0438496	0.047249	0.0633579	0.0581522	0.0542773	0.0631174	0.0649731	0.0666656	0.0800204	0.058143	0.0523713	0.0445592	0.0595679	0.0302523	0.0549556
axo00237-f_at	10.7346	10.4637	10.388	10.3805	10.3051	10.1842	10.2278	10.1965	10.0999	10.1606	10.0915	9.96914	10.1116	10.1828	10.2289	10.1841	10.277	10.2549	10.2391	10.1401	0.020253	0.00788983	0.0273266	0.0228419	0.0189007	0.0112735	0.015688	0.0155284	0.0253591	0.00650634	0.0212431	0.0192778	0.0102337	0.0120305	0.0189523	0.0194761	0.0200679	0.0133326	0.0118177	0.0216306
axo00238-f_at	10.2514	10.1708	10.1354	10.1166	10.0395	9.88048	9.88819	9.84076	9.79937	9.67922	9.71417	9.58613	9.60102	9.46837	9.44653	9.54485	9.33338	9.2338	9.30352	9.53129	0.0289382	0.0332958	0.0293382	0.0280587	0.0181766	0.021189	0.0122247	0.0126976	0.0223043	0.0195829	0.0184829	0.0275403	0.0205242	0.0244883	0.0150972	0.0240966	0.0289039	0.03032	0.0194556	0.0183878
axo00239-f_at	6.36231	6.8994	7.10755	6.66084	6.74088	6.71275	6.90413	6.77538	6.89736	6.94074	6.95986	6.92326	7.12181	7.17072	7.33616	7.43642	7.63045	7.13486	7.4831	7.45573	0.0429146	0.0530017	0.0492788	0.0308187	0.0441336	0.0526627	0.0388754	0.0405419	0.0400732	0.0229573	0.0373489	0.0277791	0.0439719	0.026519	0.0412334	0.0394365	0.0360349	0.0377972	0.0370162	0.0394941
axo00240-f_at	5.28923	5.30856	5.86238	5.94149	5.91515	5.79039	5.61844	5.6378	5.76074	5.85382	5.70749	5.78551	5.68792	5.80701	5.8801	6.06117	6.15457	6.13166	6.04964	6.08966	0.0631881	0.0568374	0.0463205	0.025178	0.0652596	0.039927	0.0452267	0.0465695	0.050517	0.0486209	0.0573893	0.0569503	0.0514232	0.0266902	0.0448514	0.0519183	0.0745088	0.0640696	0.0536468	0.0842138
axo00241-f_at	3.56521	3.73247	3.57845	3.47601	3.6026	3.54164	3.53168	3.513	3.5063	3.47855	3.51919	3.52308	3.48017	3.55262	3.53393	3.51942	3.50413	3.46908	3.50748	3.52615	0.0651633	0.0395271	0.0444764	0.0333717	0.0410649	0.0376637	0.0403748	0.0197776	0.0363303	0.0497604	0.0333077	0.0254953	0.0425031	0.0295495	0.0272368	0.0355134	0.0355108	0.042815	0.0236417	0.0285916
axo00242-r_at	9.62662	9.28575	9.28299	9.47751	9.45663	9.50788	9.53762	9.5507	9.52556	9.563	9.51025	9.549	9.61676	9.60355	9.60888	9.572	9.61519	9.7546	9.73079	9.63041	0.022202	0.0141953	0.026614	0.0266881	0.0131007	0.0221403	0.0292125	0.0168006	0.0189819	0.0108338	0.0198258	0.0128955	0.0153292	0.0196383	0.0114892	0.0260063	0.0245872	0.0137704	0.0153153	0.0240904
axo00243-r_at	6.41447	6.39519	6.09485	6.02414	5.50834	5.76387	5.85239	5.98913	6.11092	5.74287	6.01622	6.18641	6.15756	6.18799	6.30184	6.32169	6.42653	6.42328	6.36448	6.61364	0.0414046	0.0573197	0.043662	0.0332067	0.0573912	0.0567016	0.054264	0.0771648	0.0822982	0.0693313	0.0706516	0.0694605	0.0688719	0.0602727	0.0346607	0.0746566	0.0572611	0.0368489	0.0341877	0.0368098
axo00245-r_at	5.26572	4.89984	4.95126	5.05328	5.16582	5.0821	5.16426	5.37817	5.37478	5.22625	5.2756	5.37304	5.29742	5.37802	5.67896	5.40842	5.37997	5.77125	5.6338	5.50584	0.0448407	0.0563535	0.0580199	0.040683	0.0473755	0.0251235	0.0582559	0.0380173	0.0344066	0.0428466	0.0283513	0.0337146	0.0428093	0.0364685	0.0554204	0.0497108	0.0585932	0.0613223	0.0496773	0.0261356
axo00246-f_at	5.68652	5.90806	5.83247	5.89569	5.9399	5.92341	5.93508	5.90885	5.95161	5.92302	5.99508	5.95198	5.98894	5.90668	5.86117	5.89468	5.77269	5.80639	5.88407	5.91295	0.0337219	0.0351168	0.0398797	0.0369377	0.0309568	0.0240266	0.0312453	0.0290847	0.0374919	0.0187309	0.0283238	0.0225885	0.0305474	0.0255804	0.0237896	0.0270812	0.0348517	0.0383214	0.0306107	0.0319927
axo00248-f_at	3.72333	3.62412	3.65315	3.64808	3.63187	3.54434	3.60833	3.55353	3.52993	3.47399	3.55343	3.55047	3.52136	3.55868	3.55651	3.5703	3.55519	3.46101	3.52745	3.60747	0.039218	0.0375358	0.049414	0.0485844	0.0393986	0.0362679	0.0541608	0.0396962	0.0403151	0.0430638	0.0375417	0.029536	0.0457281	0.0336126	0.0559316	0.032956	0.0543233	0.0494364	0.0379203	0.0507856
axo00250-f_at	11.3542	11.326	11.2887	11.3049	11.3211	11.0709	11.2546	11.2297	10.8724	11.0051	10.9002	11.0786	11.0899	11.5079	11.5944	11.4538	11.5687	11.6288	11.5883	11.5576	0.0266633	0.02411	0.0278909	0.021404	0.0276861	0.017779	0.0159342	0.0178714	0.0245357	0.0244536	0.0216352	0.020988	0.0232717	0.021407	0.0285961	0.0136277	0.0148686	0.0168463	0.0150659	0.0183061
axo00251-r_at	9.45201	9.17359	9.17497	9.1443	9.21956	9.03943	8.87612	8.85707	8.86272	8.75335	8.73045	8.81664	8.78514	8.90294	8.8768	8.9884	9.27581	9.08511	9.11841	9.18944	0.0235341	0.040833	0.027346	0.0166682	0.0203564	0.0262632	0.0271882	0.0266409	0.0200636	0.0255709	0.0343446	0.0407324	0.022956	0.0312194	0.0268144	0.0399562	0.0227424	0.0465421	0.0556385	0.0225379
axo00252-r_at	8.52763	8.33643	8.31957	8.27815	8.36829	8.44354	8.63502	8.67878	8.6721	8.74519	8.68226	8.77955	8.84301	8.74993	9.03233	8.95423	9.18292	9.02862	8.76983	8.75011	0.0250086	0.0362529	0.0406945	0.0357661	0.0298405	0.0241075	0.0262217	0.0149005	0.0234737	0.0325514	0.0343511	0.0385666	0.0345394	0.0340548	0.02243	0.0320248	0.0393719	0.03729	0.018227	0.0242331
axo00253-r_at	6.1719	6.26344	6.4038	6.48599	6.43169	6.05142	6.0253	6.25103	6.19878	6.42372	6.01502	5.92017	6.12247	6.1265	6.27526	6.2173	6.19229	6.15773	6.25584	6.3989	0.0554024	0.0622993	0.0709842	0.0560878	0.0817088	0.0731409	0.0571546	0.0631199	0.0434168	0.0500306	0.0458525	0.036157	0.0694385	0.0528022	0.0517627	0.0547974	0.0356835	0.0595405	0.0397423	0.0269898
axo00254-f_at	4.61541	4.70866	4.53158	4.79691	4.65595	4.6706	4.6809	4.665	4.67622	4.68043	4.64376	4.68963	4.70684	4.59903	4.6067	4.59597	4.61885	4.51955	4.65131	4.60596	0.0480703	0.0184735	0.0472782	0.0436582	0.0411065	0.0269548	0.0472336	0.0389593	0.0390902	0.0329561	0.0334207	0.0289541	0.0295153	0.0323149	0.0126626	0.0435009	0.0241255	0.0411351	0.0352866	0.0385341
axo00255-r_at	8.80392	8.12128	8.1558	7.84232	7.79558	7.18522	7.04764	7.01988	7.00907	6.77162	6.70098	6.87982	6.97735	7.0512	6.93303	7.12571	7.2233	7.12595	7.26108	7.1661	0.0612699	0.0458786	0.0396064	0.0332125	0.0375195	0.0482198	0.039208	0.0497817	0.058662	0.0273301	0.0298082	0.0480024	0.0369062	0.03398	0.0352821	0.0381389	0.0301651	0.0225224	0.0215063	0.0386164
axo00256-f_at	3.69272	3.76969	3.68778	3.68991	3.77384	3.69252	3.6172	3.68012	3.70661	3.7432	3.67514	3.71297	3.69687	3.73515	3.64624	3.7052	3.68312	3.7493	3.70529	3.78825	0.0470378	0.0329087	0.0413666	0.0350998	0.033214	0.0338401	0.0273749	0.0320814	0.02707	0.0414014	0.0437361	0.0270261	0.0325262	0.0383392	0.0332163	0.045772	0.0290907	0.0377589	0.03732	0.0295987
axo00257-f_at	3.85301	3.85732	4.79749	4.56846	4.35676	4.0925	3.98722	4.10508	3.89778	4.10146	3.99231	4.04331	4.04417	3.91883	3.92357	3.98769	4.05094	4.1643	4.13232	4.24741	0.0454991	0.039167	0.20033	0.0831092	0.0652882	0.0970935	0.0452851	0.089593	0.0447428	0.0644958	0.0396416	0.0847001	0.0716339	0.094183	0.0646805	0.0726222	0.0784256	0.0646518	0.0703681	0.0881264
axo00258-f_at	3.33989	3.40938	4.13111	3.976	3.80189	3.67909	3.66006	3.62556	3.48602	3.59147	3.6406	3.61901	3.62277	3.46257	3.52283	3.45847	3.49834	3.59001	3.57016	3.65024	0.0406805	0.0453967	0.197287	0.110376	0.0453703	0.0873687	0.0343945	0.0782543	0.05839	0.0756895	0.056881	0.0677393	0.0907736	0.0784329	0.071631	0.0605118	0.043879	0.0557715	0.0561259	0.0509739
axo00259-f_at	11.9335	11.8559	11.7991	11.8867	11.871	11.7239	11.7638	11.7675	11.8362	11.8356	11.7476	11.7112	11.9302	11.7929	11.8735	11.9083	11.8786	11.7636	11.9472	11.9343	0.0190071	0.0168568	0.0200995	0.0168208	0.013933	0.0182697	0.0180238	0.0176873	0.0109723	0.0115382	0.0212746	0.0254863	0.0151008	0.0142353	0.0130766	0.0114214	0.0121766	0.0122334	0.00807539	0.00901791
axo00260-r_at	3.94684	3.95679	3.93011	4.03775	4.00037	3.90745	4.02108	3.90983	3.95212	3.9982	3.92592	3.98112	3.92796	3.8841	3.87876	3.98909	3.88427	3.93674	3.91658	3.97455	0.0369059	0.0312501	0.0178176	0.0329023	0.0509565	0.0454821	0.0306484	0.0309802	0.0377343	0.0222497	0.0362833	0.0242711	0.0263608	0.0240955	0.029306	0.0426287	0.016342	0.0448998	0.0412844	0.0306116
axo00262-r_at	6.22578	6.21673	6.21343	6.34233	6.37397	6.29822	6.53452	6.70319	6.55111	6.75189	6.62359	6.48584	6.76736	6.66159	6.62536	6.73232	7.22019	7.04976	6.86185	6.95175	0.0650452	0.0741593	0.0636866	0.0708788	0.0674137	0.0696862	0.0518421	0.0354571	0.0334072	0.0252737	0.0653752	0.0781337	0.0484757	0.0685284	0.0232215	0.0779241	0.0741805	0.081362	0.0397081	0.0591712
axo00266-f_at	12.5594	12.5224	12.6466	12.7241	12.6038	12.427	12.4973	12.2967	12.3065	12.3557	12.5516	12.4646	12.3771	12.7564	12.6765	12.6616	12.5111	12.6429	12.4823	12.7595	0.0328813	0.018369	0.0172342	0.0210129	0.0265268	0.0136033	0.0153572	0.0379786	0.0213106	0.0367112	0.0330911	0.0341738	0.0183977	0.0314218	0.0179989	0.0167304	0.0172119	0.021459	0.0164102	0.0154878
axo00267-r_at	4.88811	5.02585	4.9513	5.15482	5.07419	5.01045	4.97498	4.99577	5.03803	4.91686	5.04345	4.89191	4.99772	4.96792	4.97506	4.97273	4.94823	4.93174	4.99166	4.96362	0.0321058	0.0284649	0.0269618	0.0272583	0.0292017	0.0322544	0.0281617	0.0212687	0.0231399	0.0304631	0.0374317	0.0281943	0.0298684	0.026845	0.0214975	0.0457909	0.0406408	0.0267152	0.0224954	0.0180534
axo00268-r_at	4.17282	4.25638	4.19035	4.19706	4.1656	4.05471	4.09938	4.08892	4.08027	4.10986	4.20408	4.16608	4.19923	4.1283	4.18117	4.1585	4.14041	4.16911	4.17279	4.16351	0.0382696	0.0502349	0.0325261	0.0480254	0.0311358	0.0365911	0.0209739	0.0419036	0.0226725	0.0330248	0.0487694	0.0358865	0.0478853	0.0426327	0.0360728	0.0312098	0.044228	0.0366925	0.0358451	0.0265067
axo00270-f_at	4.65628	4.2978	4.30213	4.43492	4.42025	3.97435	4.02147	3.99113	3.96646	4.03797	3.95685	4.00216	4.00173	3.95941	3.96529	3.94699	3.93996	3.85455	3.86279	4.01999	0.118752	0.0920883	0.0915312	0.0793514	0.0672114	0.0540056	0.0338886	0.0321547	0.0526901	0.046552	0.0492892	0.0437071	0.0474025	0.041651	0.0504767	0.0294123	0.031941	0.0402435	0.0344074	0.0349964
axo00271-f_at	9.31748	8.86605	8.32667	8.00415	7.85131	7.81148	7.80006	7.78653	7.88698	7.8669	7.397	7.52113	8.14726	8.55774	8.85038	8.82164	9.12201	8.88575	8.91227	9.089	0.0666617	0.0882835	0.0687134	0.0703363	0.0652949	0.0464627	0.0531076	0.0435802	0.0608624	0.0507771	0.0629398	0.104507	0.0460468	0.0378007	0.0542457	0.0556346	0.073902	0.0678898	0.040564	0.060629
axo00273-f_at	3.85854	3.88208	3.76859	3.72463	3.69172	3.76273	3.92952	3.82819	3.86123	3.78731	4.03274	4.02297	4.03475	4.05631	4.01746	3.96669	3.94553	3.88903	3.90555	3.83188	0.0464033	0.0599461	0.0684377	0.0443135	0.0561285	0.0450933	0.0663927	0.0566231	0.0523752	0.052832	0.050429	0.0502658	0.0550352	0.0686273	0.0725071	0.0757716	0.0670395	0.0416407	0.0412448	0.0528341
axo00274-r_at	3.13442	3.25412	3.15497	3.22375	3.16249	3.21178	3.18823	3.24717	3.11648	3.16018	3.17399	3.22724	3.2158	3.2297	3.14214	3.1902	3.21932	3.12124	3.26894	3.2333	0.0505673	0.0395738	0.0413539	0.042803	0.0439126	0.0421449	0.0422704	0.0546207	0.0264905	0.0516714	0.0428244	0.0241711	0.0567163	0.0386181	0.0446344	0.0485318	0.0406887	0.0374102	0.0365533	0.0378115
axo00277-f_at	12.835	12.5204	12.2077	11.7774	11.726	11.8173	11.5668	11.6356	11.4378	11.6893	11.0668	11.4411	11.8021	11.8737	11.7266	11.5089	11.6515	11.5804	12.0656	12.0172	0.015117	0.0323016	0.0396479	0.0344827	0.0520487	0.0355667	0.0409428	0.0196412	0.0287929	0.0203222	0.0464751	0.0626339	0.0305984	0.0435001	0.0391573	0.0677387	0.0757399	0.0496058	0.0315477	0.0268721
axo00280-f_at	4.10224	4.11983	4.07447	4.20693	4.10875	4.26439	4.20422	4.17676	4.16186	4.15827	4.07349	4.01969	4.06057	4.02333	4.08843	3.91012	4.02145	4.03937	4.02995	4.11248	0.0393884	0.0339439	0.043053	0.0229059	0.0418269	0.0247871	0.0394759	0.0477568	0.0350232	0.0505115	0.0331652	0.0278757	0.0268008	0.0225355	0.0457059	0.0409262	0.0347352	0.0346712	0.0356565	0.0287469
axo00281-f_at	4.90288	5.03197	5.00852	5.05518	5.02357	5.01575	5.02299	5.01066	4.91817	4.93824	5.08345	5.07209	5.04932	5.17184	5.12265	4.96216	4.92262	4.95248	4.98228	4.94523	0.0424531	0.0210346	0.0324269	0.0301422	0.0317484	0.0409808	0.0259216	0.0294545	0.0438063	0.0378015	0.0230697	0.0250248	0.0291841	0.0471838	0.0277739	0.0474921	0.0456613	0.0500554	0.0274129	0.0296551
axo00282-f_at	4.95536	5.56526	6.02684	6.15226	6.20544	6.76075	6.75331	6.44925	6.4019	6.05425	5.92143	6.14607	6.04966	5.5977	5.77837	5.53818	5.55295	5.73361	5.36996	5.39553	0.0769124	0.103221	0.0902642	0.0834045	0.125954	0.0839141	0.0996044	0.0857058	0.0979964	0.103845	0.0911362	0.113844	0.097788	0.0712898	0.0980809	0.0868522	0.0747135	0.0883915	0.0761908	0.0781066
axo00283-f_at	10.2349	10.0651	9.93049	9.93448	9.95852	10.1727	10.2265	10.2457	10.1319	10.0297	10.2429	10.1975	10.297	10.3036	10.3276	10.437	10.5155	10.3954	10.4219	10.1902	0.0116555	0.0156394	0.0236386	0.0129396	0.0133827	0.0117838	0.0176231	0.0172744	0.0212507	0.011863	0.0255637	0.0206109	0.0123088	0.0267634	0.0140176	0.0207033	0.0199634	0.0193632	0.0180221	0.0330753
axo00284-r_at	9.7202	9.72025	9.77514	9.95811	9.93914	10.1542	10.1275	10.0356	9.97732	9.92342	10.0024	9.96091	9.87531	9.84494	9.8698	9.95278	9.9602	9.8694	9.8605	9.86297	0.0114025	0.0106374	0.0172657	0.00856616	0.0154281	0.0146672	0.00792016	0.0082769	0.0176102	0.014419	0.00648807	0.00800003	0.0150628	0.0138873	0.0123563	0.00818962	0.0165951	0.00548502	0.00663988	0.0101157
axo00286-f_at	6.91735	5.69409	5.30897	5.65233	6.08485	6.80744	7.49241	7.48607	6.97266	7.26958	6.94122	7.67841	7.62684	7.7076	7.83141	7.70981	7.77922	8.20979	8.01413	7.69287	0.057304	0.0768714	0.131808	0.150993	0.0564696	0.0869765	0.0394659	0.0338458	0.0787373	0.0475239	0.0891887	0.0340957	0.0482009	0.0246615	0.0406734	0.0516174	0.0475565	0.0195519	0.0230068	0.0458965
axo00289-r_at	8.85906	8.89897	9.08083	8.9973	8.98991	8.99468	8.90108	8.87738	9.01134	8.75907	8.91428	8.85957	8.82504	8.81581	8.86436	8.79845	8.68304	8.64377	8.74451	8.87646	0.0175233	0.0122582	0.0161739	0.0266249	0.0276793	0.0364172	0.0259206	0.0241693	0.0198527	0.0175896	0.0145845	0.0152546	0.0177633	0.0293126	0.0136549	0.0217744	0.0170413	0.022653	0.0189067	0.0192081
axo00290-f_at	5.43947	5.32521	5.32826	5.29425	5.52405	5.63254	5.78207	5.86246	5.75744	5.83103	5.50043	5.6297	5.73775	5.74578	5.85563	5.82148	5.87752	5.86836	5.76842	5.78993	0.0241814	0.0400058	0.0344982	0.062771	0.0280359	0.0399789	0.0182136	0.0229168	0.0371547	0.0349993	0.0201169	0.0346139	0.0340385	0.0397826	0.033309	0.0298928	0.0353252	0.0344658	0.0562315	0.0550552
axo00291-r_at	4.81015	4.60051	4.50863	4.4512	4.45242	4.2674	4.19837	4.16958	4.13361	4.12318	4.26843	4.24684	4.21127	4.19515	4.35919	4.20221	4.44875	4.44837	4.67435	4.63737	0.103032	0.0717243	0.0626646	0.0859209	0.0487535	0.0393725	0.046716	0.043841	0.0547867	0.052638	0.045113	0.04401	0.0679734	0.0685039	0.0490389	0.0322688	0.0587878	0.0555152	0.0728005	0.0339223
axo00293-f_at	8.87358	8.74045	8.57309	9.0133	8.94779	9.19467	8.97596	9.23158	9.34306	9.23773	9.37792	9.33774	9.20702	9.14549	9.57542	9.20505	9.36761	9.35399	9.24199	9.19537	0.0419403	0.0324437	0.0808154	0.0393972	0.0450165	0.0405169	0.0366401	0.0341668	0.0402229	0.0441273	0.0321025	0.0204025	0.0491121	0.0436329	0.0312632	0.0484464	0.0436147	0.038344	0.0312595	0.0472021
axo00294-f_at	7.07209	7.00049	6.83817	6.73956	6.85752	6.81235	6.9255	7.09617	7.24149	7.18905	7.16916	7.29756	7.34814	7.31341	7.31979	7.42337	7.29884	7.35476	7.3825	7.33831	0.0229226	0.0287171	0.0471442	0.0280949	0.0232922	0.0313863	0.0477799	0.0255025	0.0146176	0.0262525	0.0301179	0.0233635	0.0201402	0.0236243	0.0262194	0.0216157	0.0208043	0.0192341	0.0194825	0.0258643
axo00295-r_at	5.20129	4.75049	4.36341	4.03714	4.04945	3.6802	3.88522	3.77338	3.59136	3.60056	3.4568	3.4946	3.58093	3.64748	3.83118	3.83597	4.27403	4.0074	4.15332	4.20744	0.154339	0.145279	0.111888	0.0535463	0.0674833	0.0388211	0.0737661	0.0404026	0.0188425	0.0358583	0.0266954	0.0273744	0.029859	0.0415754	0.0532282	0.0610589	0.139635	0.0760457	0.125262	0.046734
axo00296-f_at	4.51671	5.09117	6.83043	7.26572	7.19702	6.96477	6.7473	6.27073	6.15259	6.1984	6.07452	5.59879	5.57816	5.36555	5.19892	5.26274	5.30759	4.72497	4.62284	4.41914	0.0854142	0.0954377	0.0880306	0.107055	0.0508026	0.125805	0.168084	0.134116	0.117968	0.128643	0.0790727	0.0821554	0.0822481	0.0493086	0.0475071	0.113192	0.0911224	0.0689641	0.0623251	0.0795903
axo00297-r_at	5.95313	6.06136	6.00557	5.95258	5.89615	5.84013	5.85999	5.82541	5.74409	5.76098	5.74395	5.81906	5.72242	5.77386	5.76375	5.76629	5.71818	5.84921	5.82835	5.85007	0.0396787	0.045921	0.0388525	0.0418777	0.0468643	0.033084	0.0267461	0.025959	0.0396732	0.0547306	0.0457505	0.0254087	0.0253013	0.0460025	0.0381011	0.0336345	0.032041	0.0424786	0.0477585	0.0338067
axo00298-f_at	8.58365	9.16587	10.6204	10.5298	11.0404	10.403	10.5062	9.73987	9.66312	11.1772	10.7778	10.5872	10.8889	10.5829	11.5566	11.1743	12.0024	10.5502	10.1867	11.0329	0.120518	0.112598	0.0778451	0.0561557	0.0727231	0.100107	0.117472	0.0810611	0.0982818	0.0590171	0.0876486	0.103797	0.101108	0.11681	0.0585436	0.156015	0.046011	0.0820788	0.0901672	0.121031
axo00299-r_at	9.28008	9.01324	8.89058	8.85797	8.87756	8.75737	8.81983	8.9115	9.0592	8.97369	9.06201	9.14594	9.20562	9.20576	9.22407	9.16696	9.14103	9.26888	9.19638	9.12408	0.0113826	0.0203411	0.0187564	0.0197116	0.0127098	0.0241297	0.0165597	0.0169575	0.0101703	0.0247501	0.0160191	0.0178394	0.0165067	0.0184894	0.0168108	0.0174335	0.0293208	0.0150766	0.0196913	0.0202542
axo00300-f_at	11.8123	11.9444	11.9313	12.0378	11.8583	11.6973	11.6766	11.5339	11.5619	11.819	11.9115	11.9822	11.9953	12.1221	12.1454	12.1775	12.0743	12.2474	12.2518	12.2965	0.0207259	0.0162392	0.0141389	0.0124399	0.0189313	0.00992406	0.0162976	0.0335215	0.02475	0.0229358	0.0232435	0.0256811	0.0149292	0.0211184	0.0113154	0.0191019	0.0155467	0.0134909	0.0135691	0.0107643
axo00301-f_at	8.53458	8.39814	8.32763	8.37756	8.41861	8.45388	8.37221	8.49846	8.55136	8.43927	8.45925	8.48021	8.58963	8.64493	8.67332	8.71167	8.83459	8.70879	8.70978	8.67704	0.0161867	0.00858199	0.019772	0.0187835	0.0138244	0.0192129	0.0124932	0.0164848	0.0230711	0.0182159	0.0251766	0.0217892	0.0182381	0.0133278	0.0138218	0.0194707	0.0102806	0.0155602	0.0117744	0.0169419
axo00302-f_at	5.46052	5.28615	5.22917	5.56061	5.37815	5.9424	5.90025	5.83626	5.52785	5.61744	5.55318	5.64483	5.69538	5.59852	5.64982	5.96647	6.14672	6.02093	5.64959	5.28739	0.0616683	0.0721505	0.0693381	0.0525226	0.0523269	0.0636332	0.0846648	0.0663863	0.0697704	0.0726587	0.0526052	0.0776248	0.0540545	0.0315206	0.0648479	0.0434112	0.0451819	0.0687228	0.056567	0.0663202
axo00303-f_at	5.93561	5.67874	5.51035	5.46861	5.26207	5.29663	5.40213	5.33075	5.3538	5.32702	5.39294	5.43612	5.60987	5.49301	5.62104	5.33068	5.58498	5.38004	5.38097	5.42675	0.0753181	0.0490276	0.0497267	0.0555894	0.0337075	0.044743	0.0672345	0.033183	0.0420334	0.0436011	0.0510587	0.0466732	0.0537212	0.0362027	0.0709994	0.0614101	0.0817313	0.0552607	0.0521169	0.0506967
axo00305-r_at	3.4271	3.41688	3.43317	3.48443	3.51864	3.69563	3.66982	3.42783	3.58295	3.49006	3.48102	3.5469	3.49963	3.46595	3.56307	3.52324	3.38388	3.43563	3.47816	3.45024	0.051103	0.0279341	0.0183618	0.0470342	0.0527613	0.071564	0.0763301	0.0456359	0.0575467	0.0425381	0.0375858	0.0315541	0.0323884	0.0277992	0.0533706	0.0310609	0.0504032	0.0316395	0.0360561	0.0461264
axo00306-f_at	4.11255	4.08284	4.29381	3.89207	3.65495	3.44504	3.50313	3.44748	3.49072	3.40821	3.36725	3.34813	3.46222	3.38327	3.36714	3.36835	3.2995	3.47364	3.58676	3.55077	0.0785761	0.11058	0.128051	0.0966058	0.0615737	0.0644177	0.0387223	0.0486464	0.061367	0.0446018	0.0295167	0.031817	0.045768	0.0412102	0.0310153	0.0383684	0.0398541	0.0394225	0.0242932	0.0416186
axo00307-f_at	3.76062	3.73984	3.60879	3.71162	3.78317	3.70367	3.66332	3.6573	3.61683	3.72286	3.6917	3.72391	3.65	3.63128	3.60481	3.64889	3.5632	3.64922	3.5936	3.7244	0.0400001	0.0459561	0.0518004	0.0357138	0.0425925	0.0429226	0.0463866	0.051915	0.0461635	0.0460781	0.0379166	0.0359871	0.0346213	0.0255712	0.0488933	0.064608	0.0288624	0.0386586	0.0143624	0.0508546
axo00308-r_at	7.35113	7.69024	8.03643	8.08904	8.18821	7.84819	7.88112	8.05307	8.08229	8.09491	7.85144	7.99017	8.00477	8.13479	8.16563	7.98141	7.99952	7.98888	8.04037	7.9751	0.0240032	0.0296801	0.0337786	0.0247638	0.0258304	0.0273128	0.0249308	0.0181096	0.0179833	0.0206085	0.0282134	0.00944839	0.0230351	0.0225204	0.0136165	0.0196978	0.0246212	0.0313008	0.0312015	0.028637
axo00310-r_at	10.3644	10.4058	10.5233	10.6253	10.7287	10.7317	10.8078	10.9091	10.9281	10.8831	10.846	10.8731	10.9893	11.006	11.0166	11.0944	11.0961	11.1335	11.0888	10.9981	0.013075	0.0197796	0.0168611	0.0108575	0.00778874	0.0210644	0.0206134	0.0105278	0.0102415	0.0150012	0.0108782	0.0134782	0.015436	0.0127975	0.0169384	0.0100927	0.00935714	0.0103387	0.00923069	0.00981919
axo00311-f_at	7.48658	7.47678	7.62529	7.72141	7.68677	8.0117	7.99673	8.07382	8.0343	8.07571	8.13348	8.16754	8.22001	8.18714	8.26227	8.32661	8.26447	8.46178	8.40079	8.24308	0.0226132	0.0374065	0.0411785	0.0330078	0.035009	0.0210599	0.0227787	0.0319294	0.0120757	0.0179627	0.0330109	0.0133872	0.0240424	0.0292662	0.0171214	0.0322608	0.0395057	0.0234015	0.0252543	0.0206946
axo00313-r_at	8.1182	8.0348	7.73217	7.95856	7.94167	8.18966	8.03272	8.01956	8.07801	8.19078	8.36007	8.27578	8.19593	8.20085	8.2623	8.57944	8.54076	8.61385	8.39108	8.29398	0.0374088	0.0549554	0.0555827	0.0399537	0.0357756	0.0262652	0.0226378	0.0275708	0.0280082	0.0308219	0.033981	0.0432107	0.0416782	0.0392276	0.0368409	0.0380084	0.0329034	0.0422517	0.0332494	0.0368245
axo00315-f_at	4.51105	4.55919	4.54842	4.65315	4.56543	4.71144	4.63597	4.61222	4.65516	4.76122	4.70318	4.53425	4.66314	4.60764	4.63345	4.61728	4.60877	4.61432	4.53276	4.54301	0.0243508	0.0360945	0.0424064	0.0334246	0.0288425	0.0257527	0.0255509	0.0356044	0.029459	0.0369784	0.0250726	0.0303373	0.0246928	0.0347099	0.030508	0.0347403	0.0361773	0.0308858	0.039606	0.037721
axo00316-f_at	3.65594	3.64057	3.6381	3.56098	3.62714	3.66595	3.61933	3.61151	3.60746	3.60192	3.5855	3.59071	3.65891	3.63493	3.67202	3.62629	3.56311	3.68208	3.58922	3.65832	0.039339	0.0312516	0.0346783	0.0359404	0.0310641	0.0355679	0.026745	0.0210584	0.0292721	0.0306361	0.0314766	0.0668487	0.0371634	0.0249929	0.0492956	0.059355	0.0280078	0.0483123	0.040183	0.0384824
axo00317-f_at	7.35786	7.55526	8.26718	8.5368	8.42198	8.63945	8.5894	8.59119	8.55266	8.71517	8.64803	8.67715	8.66272	8.56173	8.63958	8.5054	8.54048	8.56441	8.41126	8.32571	0.0720698	0.0758885	0.0182837	0.037045	0.0525882	0.028542	0.015059	0.0226321	0.0218575	0.0233453	0.02021	0.0194938	0.0196288	0.0247848	0.0221441	0.0223603	0.0255471	0.0176466	0.0088495	0.0143814
axo00318-f_at	12.7638	12.6113	12.5914	12.5313	12.5257	12.2797	12.351	12.347	12.292	12.0843	12.1325	12.0901	12.0772	12.1636	12.2003	12.2967	12.2381	12.1348	12.1799	12.206	0.0169841	0.0200519	0.0240972	0.0157155	0.0273091	0.0111569	0.0143034	0.0149016	0.0139249	0.0361127	0.0105459	0.0190107	0.0139454	0.013915	0.0165128	0.0124588	0.0104669	0.0156025	0.0142792	0.0177261
axo00319-f_s_at	11.844	11.5268	11.4933	11.4634	11.3732	11.1463	11.1825	11.0882	11.0234	10.8603	10.9066	10.9003	10.8316	10.971	10.9645	11.1019	11.1996	10.9979	11.0571	11.0297	0.0252112	0.0256448	0.0312714	0.0206437	0.0353386	0.0283808	0.0205898	0.0219814	0.0139722	0.021619	0.0129758	0.0181267	0.0241363	0.0138146	0.0183034	0.0233681	0.0191838	0.0201909	0.0229595	0.0119074
axo00320-f_s_at	9.7991	9.51232	9.5123	9.44693	9.35778	9.14457	9.21299	9.10189	8.97681	8.88712	8.84038	8.8828	8.84066	8.94591	9.14384	9.12187	9.23748	9.17267	9.12629	9.13775	0.0241888	0.0385443	0.0337336	0.027039	0.0412475	0.0144623	0.0191376	0.0109839	0.0276145	0.0166093	0.0220585	0.018969	0.0165799	0.0260985	0.0145078	0.0273723	0.0250086	0.0147171	0.0224507	0.0208165
axo00321-r_at	9.98368	9.81325	9.80159	9.83416	9.68319	9.52933	9.49259	9.51397	9.51842	9.57619	9.63885	9.69571	9.66574	9.74921	9.82539	9.89461	9.93849	9.90017	9.91223	9.98317	0.0115714	0.0122484	0.0109749	0.0158186	0.0132609	0.00868241	0.0130571	0.0143176	0.0141456	0.0146938	0.00691091	0.016771	0.0166589	0.0165223	0.0107349	0.0116658	0.0111819	0.0109108	0.00921896	0.012778
axo00322-f_at	5.9455	5.98372	5.77068	5.82334	5.6634	5.77748	5.69723	5.74165	5.74738	5.66916	5.83594	5.89018	5.95791	5.86037	5.78623	5.81479	5.7983	6.08706	5.97258	6.09035	0.0538258	0.0418059	0.0702535	0.0688609	0.0361779	0.0595487	0.0556845	0.0448521	0.0473686	0.0324651	0.0493754	0.0656395	0.0455531	0.0353155	0.060816	0.0587768	0.0512721	0.0315644	0.0301956	0.033457
axo00323-f_at	7.96413	7.9232	8.32446	8.39147	8.31597	8.46241	8.28656	8.27099	8.27243	8.27093	8.29814	8.2518	8.2008	8.20699	8.26994	8.19157	8.32767	8.51713	8.34092	8.37526	0.0299062	0.0444181	0.0586389	0.0324065	0.0190676	0.0204288	0.0343734	0.0281001	0.0302934	0.0280191	0.0298256	0.0270237	0.0297741	0.0302456	0.0264915	0.0225601	0.0361831	0.0240878	0.0227521	0.024032
axo00324-r_at	5.65173	5.46708	5.38932	5.61193	5.7209	5.66514	5.65998	5.69343	5.7806	5.67481	5.61449	5.73175	5.91505	5.80835	5.90401	5.79303	5.89248	5.83503	5.97507	6.07612	0.0370571	0.0616171	0.0454941	0.0402294	0.0310416	0.0480059	0.038012	0.0236785	0.037275	0.0354448	0.0330711	0.0279149	0.0390286	0.047087	0.0228057	0.0373965	0.0408954	0.0281405	0.0361713	0.022464
axo00325-r_at	6.80256	7.02931	6.95654	6.93377	6.91588	7.42708	7.47256	7.4871	7.39521	7.45087	7.51454	7.63428	7.56811	7.57907	7.64363	7.52544	7.46425	7.54283	7.54487	7.44594	0.0348206	0.0510219	0.0405808	0.054072	0.0530336	0.0347237	0.043761	0.0444982	0.0418343	0.0379011	0.0496348	0.041689	0.036217	0.0347485	0.0312942	0.0542578	0.0334837	0.0411453	0.0337721	0.0305535
axo00326-f_at	3.68304	3.6891	3.56856	3.70099	3.7014	3.70421	3.60583	3.55506	3.59923	3.63007	3.52913	3.60409	3.65233	3.57169	3.67051	3.73043	3.61165	3.62843	3.65851	3.67125	0.0338027	0.0470868	0.0675563	0.0777616	0.0554995	0.0499702	0.0293685	0.0322154	0.056352	0.0415293	0.0281965	0.0341957	0.0391672	0.0309836	0.0467349	0.0391871	0.0511928	0.0457025	0.0257808	0.0732126
axo00327-f_at	3.64087	3.70933	3.69319	3.73406	3.73512	3.61382	3.63042	3.64122	3.5337	3.57889	3.57807	3.57318	3.68259	3.53743	3.58473	3.49872	3.61611	3.58992	3.58622	3.64383	0.0454796	0.0312209	0.0416538	0.0398999	0.0560902	0.047921	0.0445156	0.0379956	0.0276904	0.0282906	0.0451179	0.0354788	0.0540705	0.0272972	0.0266676	0.0280174	0.0229941	0.0428357	0.0431931	0.0251215
axo00328-f_at	3.78934	3.64325	3.82291	3.84583	3.73341	3.66626	3.64894	3.66543	3.64993	3.73639	3.6016	3.64331	3.63036	3.55766	3.60222	3.58435	3.47765	3.51196	3.59406	3.67045	0.0536029	0.0848238	0.0602786	0.0492966	0.0371253	0.0352535	0.0563203	0.0705337	0.0458169	0.0566356	0.040206	0.0222708	0.0486285	0.0325474	0.0384529	0.0438191	0.0511363	0.0328803	0.0255608	0.0392252
axo00329-f_at	4.23536	4.37857	4.34142	4.38999	4.3817	4.50732	4.42821	4.27429	4.28376	4.29505	4.42127	4.37665	4.3165	4.24503	4.27632	4.28968	4.17962	4.29283	4.25569	4.29025	0.0320038	0.0362969	0.0336967	0.0393573	0.0268396	0.0339049	0.047042	0.0307004	0.0418786	0.0334321	0.0246099	0.0282624	0.0442107	0.0389555	0.0294138	0.0552533	0.0389754	0.0216424	0.0458353	0.0458401
axo00330-f_at	6.31064	6.0088	5.87913	6.00121	6.10029	5.98604	6.22634	6.60398	6.62143	6.4254	6.41109	6.50417	6.44301	6.45202	6.47275	6.71715	6.4942	6.87908	6.99696	6.69849	0.0483128	0.0683845	0.0624535	0.0665126	0.0444829	0.0504415	0.0505108	0.0343802	0.0269939	0.0349741	0.0680984	0.0520676	0.0315275	0.0206905	0.0422485	0.0413361	0.0352007	0.0442974	0.0338545	0.0355564
axo00331-r_at	9.38386	9.23854	9.20278	9.15357	8.8913	8.65649	8.80548	9.07635	9.23366	9.06584	9.23762	9.34162	9.37768	9.54793	9.56562	9.61722	9.75918	9.53951	9.46135	9.53839	0.0190765	0.0208286	0.0160449	0.0199301	0.0157392	0.0278839	0.0255774	0.0296447	0.033146	0.0212778	0.016056	0.0232345	0.0183328	0.0143463	0.0160869	0.022053	0.0125418	0.0143691	0.0157882	0.023883
axo00332-r_at	14.6947	14.5457	14.3903	14.3293	14.2768	14.2178	14.1306	13.8288	13.4292	11.0615	8.37753	7.76085	7.09033	4.75622	3.98304	4.65371	4.05293	3.92175	4.7871	4.77735	0.0047855	0.010489	0.0150229	0.0157014	0.0224737	0.0128383	0.0153509	0.0415176	0.0435023	0.306958	0.334957	0.494039	0.422684	0.240402	0.113422	0.342222	0.109529	0.0495556	0.39281	0.315309
axo00333-r_at	11.3686	11.3561	11.3722	11.3527	11.4079	11.4408	11.5015	11.5117	11.5946	11.6459	11.4701	11.5804	11.7111	11.5479	11.4863	11.3554	11.3934	11.3124	11.3894	11.4634	0.0201905	0.0179414	0.0148541	0.0174741	0.0145128	0.0191863	0.013955	0.0138948	0.0152908	0.0149294	0.0200589	0.0226879	0.0197476	0.015364	0.0135453	0.025743	0.00824224	0.0130941	0.0109825	0.0127665
axo00334-r_s_at	12.4531	12.5261	12.6426	12.7138	12.7502	12.8139	12.8195	12.8334	12.8792	12.8992	12.9398	12.9327	12.903	12.8926	12.8618	12.9198	12.9465	12.9299	12.942	12.9638	0.00795581	0.0116739	0.0165424	0.00741251	0.008077	0.00729785	0.0062462	0.0106223	0.00997174	0.00899834	0.00580875	0.00515151	0.00855183	0.00651932	0.0111048	0.00469057	0.00837081	0.00341169	0.00513699	0.0082294
axo00335-r_at	9.92311	9.92952	9.98641	10.106	9.93492	9.70256	9.86397	9.9695	10.1772	10.1623	10.2547	10.4637	10.3848	10.203	10.09	9.89933	10.0738	9.98157	10.0804	10.1387	0.0255413	0.0368036	0.0225287	0.0242564	0.0369011	0.0975065	0.0865779	0.0290592	0.022454	0.0339713	0.0295285	0.0270683	0.0354576	0.03645	0.0650185	0.071639	0.0262418	0.0298578	0.0302928	0.024682
axo00336-f_at	3.88258	3.74259	3.80323	3.90227	4.13138	4.25248	4.07917	3.94331	3.84513	4.03	3.935	3.93961	3.98981	4.01265	4.00239	4.04464	3.99343	4.17238	4.01536	3.95978	0.0622993	0.038911	0.0457235	0.0304991	0.0477523	0.0598525	0.0657279	0.055688	0.0470096	0.0348495	0.0324217	0.0474795	0.041225	0.0162472	0.0386383	0.0477283	0.0513991	0.0707263	0.0501483	0.0207525
axo00337-f_at	3.69615	3.77506	3.81734	4.05167	3.93238	3.87745	3.87729	3.7882	3.82184	3.72312	3.83129	3.69918	3.77036	3.75392	3.82866	3.78997	3.79066	3.67936	3.80255	3.81258	0.0344734	0.0416044	0.0264407	0.0599952	0.0353326	0.0420895	0.0312456	0.0409704	0.0306456	0.0353986	0.0508453	0.0466812	0.0283768	0.0468626	0.0492342	0.0371658	0.0558551	0.0454897	0.0220599	0.0212745
axo00338-f_at	5.05975	4.80992	4.71529	4.61217	4.58372	4.72519	4.67127	4.74535	4.72726	4.73302	4.72772	4.69795	4.61342	4.57912	4.65355	4.63944	4.67414	4.63546	4.63638	4.60933	0.0653539	0.0368001	0.021636	0.0404533	0.054914	0.023921	0.0396508	0.0348191	0.0786194	0.0502969	0.0519792	0.0410878	0.0515665	0.0470702	0.0375189	0.0398631	0.0378397	0.035784	0.0449552	0.0376823
axo00339-f_at	4.26531	4.189	4.11987	4.08592	4.11919	4.10883	4.17327	4.24749	4.22789	4.18232	4.18584	4.18653	4.18582	4.23321	4.28109	4.21944	4.29325	4.23164	4.16973	4.26724	0.0385468	0.046262	0.0279421	0.0270263	0.029688	0.0261103	0.0406145	0.0369031	0.0379073	0.0203585	0.0323788	0.0264852	0.00739052	0.0321873	0.0438985	0.0246304	0.0333142	0.0453856	0.0314862	0.0348947
axo00340-f_at	6.95624	6.41811	6.22423	6.12828	6.1095	5.87047	5.92659	5.90509	6.07746	5.79695	5.7888	5.6502	5.63965	5.5659	5.64114	5.64364	5.71261	5.60489	5.55264	5.60086	0.0682543	0.0747524	0.0730314	0.0367894	0.0691518	0.0571546	0.0497994	0.0580041	0.0793655	0.0448935	0.0714301	0.0462306	0.0779323	0.0517227	0.0311843	0.042447	0.0591008	0.0467078	0.0374748	0.0309355
axo00341-f_s_at	12.6638	12.8167	12.7519	12.7668	12.7485	12.9153	13.0557	13.2789	13.286	13.2343	13.2164	13.1681	13.2199	13.2137	13.2954	13.3101	13.316	13.4364	13.4459	13.3147	0.0138715	0.0140076	0.0178104	0.0122392	0.0136357	0.0101754	0.01797	0.00930114	0.0100663	0.0125098	0.00718789	0.00943838	0.0130154	0.00855635	0.00924187	0.00828049	0.0114056	0.00943788	0.0115439	0.0106106
axo00342-f_at	10.899	10.8598	10.6663	10.7308	10.6097	10.4717	10.5553	10.6625	10.7252	10.7988	10.8146	10.8198	10.7976	10.8545	10.8352	10.9669	10.9905	11.0169	10.8853	10.7872	0.0112999	0.015179	0.014119	0.0105706	0.0112752	0.0154486	0.0130537	0.0142937	0.00890945	0.00944213	0.00992244	0.0112914	0.0102378	0.00925954	0.0171561	0.00873959	0.0123453	0.00894847	0.0102356	0.0119334
axo00343-f_at	8.37704	8.4315	8.49474	8.30272	8.45769	8.28996	8.4967	8.59172	8.51981	8.76425	8.61606	8.65956	8.77289	8.83363	8.77912	9.00496	8.8677	8.92536	9.0939	9.21243	0.058079	0.0225052	0.049501	0.0404416	0.0381622	0.0325815	0.0391657	0.0290103	0.0254474	0.0341455	0.0436465	0.0357335	0.0386435	0.027586	0.0308587	0.0343753	0.0370243	0.0313093	0.0337432	0.0403274
axo00344-f_at	4.24309	4.41395	4.32666	4.44502	4.33949	4.27248	4.32801	4.26392	4.23004	4.35453	4.33984	4.34351	4.28417	4.37019	4.29191	4.25208	4.28427	4.22453	4.2298	4.31071	0.0345056	0.051399	0.0395866	0.0485811	0.0428439	0.0378257	0.0362284	0.0363525	0.0309205	0.0436044	0.0349923	0.025962	0.0443455	0.0651571	0.0292149	0.0470281	0.0342538	0.0410672	0.0470851	0.0272217
axo00345-f_at	11.4711	11.4521	11.7761	11.8788	11.8484	11.7306	11.6812	11.7088	11.5225	11.5655	11.4262	11.5349	11.4941	11.5395	11.5764	11.5881	11.58	11.6744	11.5227	11.4742	0.00675552	0.00775343	0.0114821	0.0115151	0.00982023	0.00965826	0.0101583	0.0113452	0.0116355	0.00716284	0.00799215	0.0048178	0.00936508	0.00571341	0.00623905	0.00883617	0.00657805	0.00892656	0.00977417	0.00911613
axo00346-r_at	8.71891	8.7035	8.58118	8.62859	8.66188	8.57701	8.62236	8.61875	8.7214	8.52997	8.60602	8.61731	8.67342	8.76637	8.69805	8.83271	8.88989	8.56607	8.54005	8.66988	0.0219629	0.0180205	0.023079	0.025457	0.0237506	0.0142065	0.0158106	0.0151962	0.0180341	0.0176067	0.0177441	0.0155651	0.0146237	0.0178654	0.0131181	0.0173142	0.0147191	0.014457	0.0161297	0.0195981
axo00347-f_at	5.3598	5.24469	5.07191	5.31701	5.14918	5.74016	5.57791	5.60499	5.61162	5.68998	5.81149	5.68273	5.54498	5.58238	5.33777	6.08206	5.84774	5.79257	5.69786	5.53332	0.0947025	0.124098	0.0808963	0.0630195	0.0746231	0.0726652	0.0847934	0.0674547	0.111011	0.114925	0.0845393	0.0701109	0.0788479	0.053609	0.0508228	0.139197	0.119754	0.169827	0.0913875	0.136457
axo00348-r_at	7.19651	7.29788	7.3579	7.36812	7.44696	7.51693	7.48944	7.46647	7.55073	7.47512	7.51687	7.55885	7.50136	7.47295	7.44515	7.46155	7.27735	7.42565	7.4124	7.43405	0.0270198	0.0222555	0.0135991	0.0260657	0.0211145	0.023853	0.0344407	0.0169371	0.0201298	0.02492	0.0126627	0.0255887	0.0342473	0.0329804	0.0242559	0.0213094	0.03204	0.0219924	0.0135971	0.0256727
axo00349-f_at	7.96661	8.92191	9.02163	9.27005	9.38863	9.42248	9.10959	8.98237	8.99538	9.32053	9.3521	9.19492	9.07383	8.94954	8.91175	8.58749	8.5538	8.90886	8.52456	8.71902	0.0436343	0.0426614	0.0603698	0.040535	0.0316502	0.0221174	0.0389253	0.0572072	0.0636432	0.0401284	0.0316988	0.0364831	0.0386231	0.0127676	0.0140893	0.0553144	0.033171	0.0290166	0.0277795	0.0173533
axo00350-f_at	3.45497	3.35722	3.26784	3.45045	3.33974	3.29659	3.33753	3.21791	3.30237	3.32022	3.29739	3.30252	3.29825	3.25908	3.28915	3.2732	3.23187	3.27409	3.29579	3.32706	0.0390203	0.0356257	0.0322976	0.0744336	0.0475161	0.0436391	0.0536687	0.0397997	0.0346328	0.0654264	0.0510741	0.0324761	0.0441562	0.030464	0.0371031	0.0508722	0.0503208	0.0506167	0.0361894	0.0459268
axo00351-r_at	14.5226	14.4617	14.484	14.4479	14.4855	14.4354	14.4864	14.4727	14.4707	14.4822	14.4568	14.46	14.4557	14.4902	14.4435	14.5155	14.4745	14.4778	14.4681	14.4668	0.00496421	0.00424997	0.00612316	0.00448031	0.003431	0.00376478	0.0031982	0.0025869	0.00249003	0.0022045	0.00240966	0.00771433	0.00453808	0.00479239	0.00411873	0.00316664	0.00530499	0.00451492	0.00265187	0.00491009
axo00352-f_at	3.77164	3.72212	3.71135	3.78807	3.6643	3.7156	3.75276	3.74399	3.77466	3.76909	3.79246	3.7942	3.77902	3.74867	3.78461	3.79506	3.62768	3.7659	3.77912	3.78099	0.050079	0.0460048	0.0408373	0.0621012	0.0297018	0.0453664	0.0224654	0.0489505	0.0312294	0.0524256	0.0345699	0.0321911	0.0459135	0.0449058	0.0268337	0.0234169	0.04062	0.0640282	0.035873	0.0497226
axo00353-f_at	3.69189	3.81954	3.76679	3.69474	3.70907	3.85862	3.82364	3.79884	3.70647	3.7626	3.85844	3.90952	3.78031	3.80713	3.83961	3.84538	3.88833	3.78362	3.84293	3.84411	0.0312028	0.0420015	0.0298957	0.0360788	0.0374562	0.0500546	0.0540323	0.0435976	0.0378109	0.0385761	0.0422825	0.0373478	0.0243796	0.0340835	0.0343803	0.0434974	0.0424189	0.0416979	0.0385916	0.0746559
axo00356-f_at	4.44698	4.53436	4.48426	4.61289	4.50994	4.51892	4.58952	4.55332	4.60886	4.60611	4.55253	4.58823	4.6672	4.64694	4.59699	4.50553	4.59021	4.55946	4.56958	4.56087	0.0188858	0.0414779	0.0315747	0.032304	0.0385335	0.0500453	0.0343844	0.0217696	0.0480442	0.0558749	0.0395557	0.0407259	0.047919	0.0299121	0.0300988	0.0518129	0.0265679	0.0445489	0.0339961	0.042216
axo00357-r_at	3.94421	4.04877	3.93482	4.00214	3.90347	3.89513	3.92427	3.9576	3.90781	4.02507	4.12773	3.98507	3.9204	3.98195	3.92909	4.01831	4.10693	3.94091	3.95338	3.97075	0.0350189	0.033063	0.0441192	0.0400853	0.0541875	0.0455485	0.0304733	0.0396103	0.0297777	0.0405357	0.045771	0.0314314	0.037251	0.0399446	0.037219	0.0445383	0.0425989	0.0310057	0.0533071	0.0370859
axo00360-f_at	7.20492	7.35158	6.97833	7.20323	7.05319	7.10748	7.05332	7.23656	7.02108	7.36606	7.48357	7.50275	7.37524	7.27823	7.38697	7.21956	7.35958	7.579	7.39313	7.51836	0.0458951	0.0415321	0.0561752	0.0708546	0.046207	0.0655227	0.0686319	0.0599469	0.0697253	0.0902982	0.0619588	0.0709838	0.0567858	0.0664768	0.0332391	0.0422305	0.0356565	0.0446259	0.0251415	0.0400127
axo00362-f_at	5.20883	5.20868	5.17702	5.2484	5.10525	5.1807	5.1533	5.07059	5.1075	5.0592	5.19939	5.15598	5.13064	5.01164	5.1116	5.11783	5.07073	5.02899	5.13315	5.13448	0.0407939	0.0512774	0.0338687	0.0428663	0.0391064	0.0224968	0.0256585	0.0226139	0.0151583	0.0354099	0.0357961	0.0379209	0.0394677	0.0320227	0.0266459	0.0239948	0.0256258	0.035115	0.024199	0.0345565
axo00363-f_at	5.02289	5.19063	5.24019	5.21637	5.17216	5.14581	5.1711	5.10639	5.14086	5.19599	5.29642	5.19863	5.20721	5.17974	5.17098	5.10069	5.14664	5.0982	5.09478	5.16404	0.0297789	0.037417	0.0501633	0.0467023	0.0459582	0.0363142	0.0304011	0.0365289	0.0539964	0.0288385	0.0296746	0.0332831	0.0217449	0.0301626	0.0243663	0.04937	0.0389353	0.0376176	0.029152	0.0358567
axo00364-f_at	6.4613	6.13196	6.28556	6.37037	6.31368	5.9971	5.8043	5.9264	5.96291	5.71751	5.61786	5.43111	5.4293	5.22032	5.31226	5.25141	5.18916	5.1696	4.82072	5.01654	0.0787006	0.0879956	0.0605101	0.0543949	0.0731747	0.0334156	0.0562682	0.0541752	0.0609171	0.0680422	0.0574315	0.065106	0.0498798	0.0782559	0.0350826	0.0541524	0.0583563	0.0855972	0.0956976	0.0543754
axo00366-f_at	5.05571	4.99691	5.04819	5.14559	5.02048	5.1629	5.1402	5.23336	5.17255	5.22372	5.26184	5.48731	5.24454	5.26854	5.18468	5.3476	5.26245	5.65667	5.24426	5.15897	0.0483412	0.0384811	0.0581138	0.060618	0.0617299	0.0256021	0.0413421	0.041663	0.0369182	0.0545188	0.0452138	0.061716	0.0442881	0.0470476	0.0567956	0.067057	0.0619941	0.0443005	0.0476624	0.0490507
axo00367-r_at	6.26618	5.78571	5.95488	6.20133	6.4256	6.19958	6.23613	6.39198	6.19716	6.3439	6.10604	6.36495	6.40016	6.34969	6.43797	6.41308	6.44636	6.52687	6.54737	6.56116	0.0327846	0.0401189	0.0343513	0.0471723	0.0438211	0.0611813	0.029405	0.0203939	0.0362712	0.0466693	0.0576457	0.0289246	0.0336037	0.0444741	0.0379727	0.0349096	0.0380663	0.0312298	0.0356866	0.0376915
axo00368-r_at	4.3192	4.32464	4.26234	4.27059	4.27364	4.20236	4.1525	4.20842	4.21016	4.27521	4.14703	4.21155	4.24564	4.18194	4.21332	4.25101	4.21569	4.28044	4.21875	4.34029	0.0453423	0.0372607	0.0279515	0.0376652	0.0446668	0.0681418	0.0333819	0.0285638	0.0260738	0.0434917	0.0435943	0.0278078	0.0397442	0.0372271	0.0324038	0.034479	0.0413962	0.0363916	0.0307108	0.040984
axo00369-f_at	5.11553	5.66139	6.131	6.06528	6.52882	7.46818	7.61922	7.48959	8.16934	8.16116	8.40608	8.68636	8.89525	8.83782	9.21675	8.79126	8.32867	9.0061	9.47182	8.97794	0.147004	0.22158	0.135613	0.113233	0.178019	0.111871	0.153939	0.169755	0.145325	0.107276	0.143089	0.134467	0.102175	0.0934933	0.116118	0.149265	0.123626	0.10965	0.105457	0.170337
axo00370-r_at	9.21912	10.0198	10.9085	10.915	11.5448	11.9694	12.1605	11.9378	12.6524	12.7022	12.8732	12.9246	13.1871	13.28	13.3792	13.1862	12.9191	13.2381	13.6882	13.2021	0.117829	0.125778	0.0700527	0.069525	0.057666	0.0554479	0.0753868	0.0922672	0.0658237	0.0564794	0.0703443	0.0632244	0.0578703	0.0386963	0.0441885	0.0653174	0.0605216	0.06164	0.0408329	0.0972775
axo00371-f_s_at	10.6108	9.87948	10.2505	9.64575	10.1799	11.2978	10.9598	11.3993	10.6507	10.214	11.5437	12.2895	11.1033	11.7415	11.4484	12.7282	11.4272	11.9157	13.0782	12.7011	0.124305	0.164637	0.0950645	0.170207	0.155602	0.192435	0.132702	0.0797688	0.208881	0.206754	0.111872	0.0766617	0.159873	0.100613	0.175185	0.10399	0.202519	0.152775	0.0948663	0.115405
axo00372-f_at	3.63967	3.81281	3.72836	3.72556	3.74581	3.67512	3.64386	3.6432	3.65984	3.65022	3.82493	3.67803	3.676	3.67374	3.73851	3.68597	3.69866	3.62917	3.70769	3.80086	0.0416642	0.0514243	0.0274891	0.0329095	0.0383198	0.063012	0.0269046	0.0351168	0.043529	0.0221208	0.0165823	0.0385837	0.04095	0.0443599	0.0290535	0.0500646	0.0362481	0.0462294	0.0407871	0.034257
axo00373-f_at	3.82121	3.85116	3.81307	3.85009	3.86212	3.81873	3.84172	3.84959	3.8765	3.88872	3.94148	3.94119	3.88841	3.92745	3.88782	3.87595	3.90851	3.87045	3.85735	3.89182	0.0225024	0.036472	0.0213167	0.048502	0.0356179	0.0314331	0.0317911	0.0347724	0.0324149	0.0521357	0.0310046	0.0275125	0.0501419	0.0404193	0.0254663	0.045171	0.0264787	0.028145	0.0516987	0.0306618
axo00376-f_at	10.6706	10.5532	10.3632	10.0629	10.0621	9.96361	9.9753	10.2388	10.3565	10.7233	10.4096	10.4858	10.7572	10.7126	10.595	10.5003	10.6449	10.674	10.9116	11.0339	0.0644749	0.0544624	0.0705338	0.0454698	0.0433836	0.0321894	0.0268635	0.050353	0.0293323	0.0163208	0.0458151	0.0622023	0.030939	0.0282533	0.0151883	0.0584586	0.0354999	0.0405344	0.025973	0.0200137
axo00377-f_at	6.21367	6.25105	5.75985	5.82379	5.50132	5.57646	5.30742	5.48739	5.70188	5.79003	6.049	6.10229	6.02817	6.03022	5.85371	6.07238	5.97715	5.81868	5.96343	5.89582	0.0625067	0.0699044	0.0961387	0.0626638	0.0726011	0.0743157	0.0635362	0.055042	0.0592457	0.051195	0.0838382	0.0854932	0.0521474	0.0767986	0.0594339	0.0312431	0.0648336	0.0577375	0.0591311	0.109634
axo00378-r_at	3.32142	3.37546	3.42119	3.3507	3.35614	3.37602	3.34743	3.34897	3.29932	3.32722	3.33182	3.28779	3.33482	3.31889	3.28688	3.2965	3.34677	3.27104	3.29504	3.27708	0.0401293	0.0355124	0.0299732	0.0501693	0.032338	0.0389791	0.0246107	0.0482688	0.0278077	0.0414744	0.0406711	0.0300688	0.0270151	0.0341521	0.034887	0.0431076	0.0270865	0.0154337	0.0268716	0.0597043
axo00380-f_at	7.39608	7.03147	6.79995	7.1777	7.31689	7.3282	7.30148	7.19449	7.28527	7.3256	7.7498	7.62202	7.47121	7.52195	7.38427	7.95433	7.90738	7.68307	7.44434	7.31783	0.044926	0.0476181	0.0613446	0.0253251	0.0430038	0.0713168	0.0749166	0.0625663	0.0404803	0.0620419	0.0265033	0.0372192	0.0360708	0.0418997	0.0285289	0.0209276	0.0214211	0.026104	0.034248	0.0269315
axo00381-f_at	7.66845	7.08724	6.74994	6.64496	6.77039	7.59882	7.61227	8.07109	8.40628	8.6825	8.71968	8.94363	9.0298	8.56601	7.97741	7.33677	7.36349	7.56659	7.66285	7.745	0.0507171	0.10897	0.0741343	0.0584786	0.0683301	0.060516	0.0675588	0.0623385	0.0444854	0.052429	0.11009	0.0909151	0.0648017	0.0618795	0.0841501	0.143986	0.0620361	0.0717318	0.0772599	0.0461939
axo00382-f_at	3.57069	3.68492	3.60706	3.66268	3.68925	3.68296	3.70701	3.62798	3.74033	3.75689	3.84539	3.76108	3.80257	3.67278	3.64073	3.59662	3.54387	3.57249	3.66904	3.65904	0.0508355	0.0380342	0.0500901	0.0530251	0.0565001	0.0442408	0.0364864	0.0414959	0.0476593	0.0368488	0.0542513	0.0535245	0.084094	0.0536128	0.0280423	0.0620715	0.0300505	0.0644936	0.0515946	0.0477645
axo00383-f_at	6.48651	6.31097	5.89275	5.94008	6.09559	6.73226	6.80996	7.20086	7.37656	7.6646	7.74684	7.82413	7.82767	7.3796	6.8188	6.52913	6.30786	6.44687	6.58415	6.57705	0.0613123	0.150961	0.080381	0.053151	0.0453371	0.0642111	0.0872575	0.0817527	0.0663058	0.0547644	0.10819	0.101622	0.0617869	0.0641407	0.0773745	0.127778	0.0394293	0.0652039	0.0800263	0.0619501
axo00384-f_at	9.14672	9.04726	9.12144	9.06897	9.1802	9.45236	9.495	9.73421	10.0372	9.98134	9.99406	10.1346	10.2127	10.4835	10.4386	10.4574	10.4537	10.4364	10.5736	10.3228	0.0363214	0.0424437	0.0470217	0.0431826	0.0313054	0.0157782	0.0280128	0.0383553	0.017863	0.0216681	0.0292055	0.018457	0.0321591	0.0195791	0.0229497	0.0190418	0.0266347	0.0141039	0.0114676	0.0252136
axo00385-f_at	6.32667	6.04131	6.44118	6.07908	6.69716	6.54714	6.86701	6.86456	6.79045	7.24653	6.99742	7.00792	6.23146	6.66085	6.06428	5.98168	5.92313	6.3936	5.78038	5.82168	0.113152	0.122666	0.116584	0.127434	0.135199	0.133609	0.0968271	0.102631	0.130969	0.083655	0.104525	0.0819991	0.121574	0.107594	0.137154	0.121386	0.112791	0.131356	0.0953071	0.073213
axo00386-f_at	5.12348	5.09357	5.08232	5.23655	5.0418	5.17282	5.12557	5.0813	5.0491	5.11245	5.23944	5.24732	5.15152	5.14503	5.25694	5.47253	5.37089	5.28889	5.15462	5.07112	0.0503383	0.0461376	0.0462256	0.0305703	0.0469393	0.0716339	0.0459675	0.0457029	0.0639589	0.0536347	0.0446359	0.0442938	0.0563359	0.0502961	0.0365463	0.0591198	0.0395685	0.0458307	0.0343708	0.0218884
axo00387-r_at	11.836	11.6651	11.7237	11.7431	11.7406	11.5854	11.5818	11.6645	11.6582	11.616	11.6984	11.7135	11.759	11.8371	11.9213	12.0101	12.109	12.0347	12.0398	12.0336	0.0165508	0.0133307	0.0105873	0.00893292	0.0172817	0.00777942	0.00562079	0.00806238	0.011155	0.0101074	0.00889258	0.00897659	0.0101906	0.00796686	0.00871119	0.0136009	0.0146809	0.0119622	0.00954742	0.00821446
axo00388-f_at	6.44961	6.68149	6.58602	6.59734	6.76553	8.06224	8.03271	8.43037	7.93273	7.81891	7.65997	7.65521	7.48986	7.63981	7.52345	7.49509	7.41339	7.37606	7.51201	7.71536	0.0564457	0.0662631	0.0443723	0.0674649	0.091421	0.0590739	0.0727909	0.0513036	0.0534515	0.0443274	0.0636237	0.0496459	0.0369415	0.056198	0.0496908	0.0502313	0.0351654	0.0496301	0.0539688	0.0462468
axo00389-f_at	5.23411	5.09937	4.97131	5.0168	4.9995	6.26674	6.24564	6.54932	6.24601	6.04252	6.3087	6.30837	6.08292	6.15964	6.01102	5.79329	5.708	5.63268	5.40669	5.51952	0.0721908	0.0871589	0.0784076	0.0708027	0.0695191	0.105928	0.105484	0.0927563	0.102182	0.0980205	0.0894734	0.0736182	0.049799	0.0595793	0.0611755	0.0879699	0.0778914	0.116241	0.0435391	0.0678685
axo00390-f_at	8.23101	8.43755	8.85061	8.87937	9.06092	9.15447	8.9638	8.51044	8.70095	9.3922	9.31695	9.56844	9.50459	9.55926	9.39474	9.66781	9.02	9.50979	9.50674	9.64853	0.11285	0.113537	0.0498484	0.0877214	0.0883902	0.0721992	0.0756213	0.117977	0.061206	0.0711856	0.074301	0.0724746	0.0619623	0.0804273	0.063173	0.104782	0.0663655	0.0687268	0.0758844	0.106518
axo00391-r_at	8.18446	7.87635	7.68796	7.77274	7.77144	7.94824	7.94791	8.18061	8.03805	7.89091	7.90198	7.99315	8.10247	8.08042	8.32604	8.09539	8.48036	8.62089	8.21668	8.17729	0.0471301	0.0510171	0.0469245	0.041511	0.0580361	0.0952915	0.0928837	0.0505254	0.0506758	0.0730745	0.0454416	0.0780019	0.0747187	0.0887494	0.0697125	0.0488482	0.0195683	0.0413109	0.0639927	0.0390388
axo00392-f_at	6.73821	6.4149	6.4045	5.99045	5.85068	5.80697	6.13084	6.27596	6.30116	6.26761	6.23041	6.3728	6.53122	6.58623	6.70349	6.60051	6.84035	6.50326	6.55032	6.58925	0.0425248	0.0435402	0.0343416	0.0437954	0.0589623	0.0394554	0.0395257	0.0321957	0.0597821	0.0397975	0.0371776	0.0381432	0.0366576	0.0373481	0.029033	0.0505897	0.0418981	0.0434749	0.0390271	0.0324808
axo00393-f_at	7.29651	7.02031	7.10357	7.00994	6.83685	6.5846	6.48547	6.48286	6.48829	6.37232	6.71111	6.65813	6.55882	6.67743	6.68316	6.84766	6.86619	6.79622	6.73201	6.69551	0.0309537	0.045073	0.0359581	0.0404714	0.0647813	0.0472707	0.0407736	0.0314542	0.0298128	0.0390366	0.0417585	0.0226591	0.0297131	0.0404209	0.0272414	0.0570339	0.0398876	0.0400167	0.0316625	0.0365584
axo00394-f_at	7.40209	7.30474	7.15602	7.05273	7.08244	7.53092	7.91454	8.28404	8.09016	7.93812	8.02604	8.20514	8.39327	8.32609	8.44424	8.57506	8.25134	8.60412	8.6751	8.31887	0.0430581	0.0506575	0.0628068	0.0351303	0.050337	0.0315056	0.0372403	0.0372336	0.0224479	0.0243328	0.0237445	0.0316464	0.0377054	0.0329283	0.0224691	0.0315172	0.0329267	0.0235663	0.0207704	0.0479379
axo00395-f_at	7.80369	7.96664	7.76717	7.79524	7.65609	7.82375	7.75411	7.66935	7.85373	7.80689	7.72155	7.87925	7.85997	8.00651	8.12676	8.04221	8.45801	7.94676	7.84785	7.95269	0.0555268	0.0655208	0.0626667	0.0492692	0.0517855	0.0371148	0.0449784	0.0556466	0.0465533	0.0540667	0.0574888	0.0829558	0.0357749	0.0550695	0.0697253	0.0755631	0.0490105	0.0422514	0.028496	0.0451775
axo00396-r_at	5.64584	5.49281	5.63732	5.64194	5.79945	5.96021	5.86155	5.77371	5.9502	5.89324	5.83616	5.87186	5.98034	5.80335	5.85782	5.77179	5.78417	5.81973	5.61702	5.77541	0.0199778	0.0755995	0.0413826	0.0230652	0.035861	0.0334265	0.0332948	0.0313221	0.0245449	0.0212494	0.0259394	0.0312644	0.0351688	0.0243089	0.0299452	0.0525357	0.0337311	0.049647	0.029175	0.0334587
axo00397-f_at	9.26949	9.12699	9.2772	9.33404	9.47136	9.42721	9.55832	9.58714	9.5879	9.58559	9.47134	9.55291	9.62605	9.56996	9.56232	9.56018	9.66374	9.61404	9.582	9.56198	0.0114413	0.0144341	0.00999464	0.013006	0.00790411	0.0136268	0.00801049	0.0159577	0.0126435	0.00903921	0.0103346	0.015673	0.0119457	0.0116949	0.00953936	0.0141729	0.0091743	0.0114816	0.0164948	0.0147026
axo00398-r_at	9.75519	9.15132	8.95942	8.95457	8.80645	8.30696	8.35645	8.15369	7.94943	8.21974	8.25793	8.32033	8.38888	8.4561	8.56868	8.78336	8.76653	8.85714	8.95482	9.13779	0.0468611	0.0546926	0.0386947	0.0481571	0.062757	0.0231561	0.027058	0.0302811	0.0268342	0.0244671	0.0480686	0.039838	0.0334405	0.0264769	0.0357563	0.0339545	0.0329153	0.024211	0.0248141	0.042603
axo00399-r_at	7.17053	7.03538	7.08075	7.10619	7.05375	7.35679	7.32221	7.34652	7.33474	7.1483	7.24216	7.07532	7.32333	7.15837	7.2322	7.16111	7.34864	7.05856	7.27103	7.25895	0.0516508	0.0461067	0.0442929	0.0368388	0.0475061	0.0462402	0.0486847	0.0324516	0.0433822	0.0551379	0.0331848	0.0599758	0.0378636	0.0398019	0.0388058	0.0255093	0.0267659	0.0450651	0.049055	0.0401282
axo00402-r_at	7.38448	7.27111	7.06805	6.81559	7.1703	7.52955	7.34916	7.45492	7.61397	7.81311	7.74197	7.74782	7.67357	7.72874	7.68429	7.7143	7.63864	7.82008	8.13601	7.97254	0.0308597	0.0286974	0.0328254	0.0362148	0.0506062	0.0373361	0.0522275	0.0466732	0.0553267	0.0325264	0.0463099	0.0293324	0.0406346	0.0197903	0.0313899	0.0185168	0.0221616	0.0266569	0.0195749	0.027085
axo00405-f_at	4.07496	3.96949	4.06989	4.06038	3.98345	4.00562	3.98135	4.03813	4.01912	4.00611	3.94767	4.00723	4.03592	4.00155	4.06067	4.12472	4.0921	4.03975	3.99979	3.98264	0.0538504	0.0312855	0.0357574	0.0352088	0.0513346	0.0332928	0.0354136	0.0413297	0.0489362	0.0307166	0.0445415	0.0588001	0.0524368	0.0525743	0.051144	0.0375018	0.0447599	0.0396155	0.0343829	0.0267308
axo00406-f_at	4.0381	4.05753	4.10968	3.98125	4.16098	4.14711	4.11708	4.12465	4.15159	4.16188	4.05338	4.15502	4.21211	4.23463	4.22757	4.16961	4.30894	4.17894	4.19656	4.08852	0.0273783	0.0467257	0.0575369	0.0490765	0.0506584	0.0489409	0.0451559	0.0363517	0.0392254	0.0395082	0.0300032	0.0337182	0.0567707	0.0479953	0.0383654	0.0586676	0.08411	0.0567032	0.0534016	0.0800748
axo00407-f_at	5.8776	7.98624	6.91584	7.04828	6.75918	6.89495	6.66033	6.86879	7.32611	7.02972	7.30484	7.0491	7.14074	6.97447	6.93209	6.14288	6.00689	6.27746	6.41481	6.35393	0.0644991	0.0596322	0.0621294	0.070421	0.0734163	0.0785455	0.0669617	0.12365	0.0765722	0.0864499	0.0889168	0.110813	0.103505	0.0742141	0.107476	0.0967011	0.0963556	0.0622709	0.092722	0.104377
axo00408-f_at	6.0222	6.6521	6.54612	6.8346	6.46718	6.78572	6.61746	6.48249	6.75085	6.92192	7.40312	7.23556	6.98801	6.99667	7.09989	6.34302	6.44883	6.36192	6.30649	6.42258	0.0923557	0.0791643	0.0674886	0.0634683	0.0932975	0.0631941	0.0652451	0.10295	0.0892003	0.0661199	0.0963199	0.0996583	0.0889998	0.0780396	0.0893328	0.0976754	0.0836242	0.121187	0.0737225	0.0811052
axo00410-f_at	3.8941	3.90728	3.91789	3.9539	3.96291	3.97221	3.92944	3.89421	3.79291	4.01298	3.93294	3.93549	3.94785	3.91139	3.90641	3.87045	3.89867	3.89195	3.88517	3.85665	0.0580008	0.034731	0.046862	0.0365147	0.0281314	0.0449743	0.0340529	0.0400569	0.049057	0.0561217	0.042604	0.0372326	0.0280992	0.0628598	0.0385618	0.0440304	0.0581874	0.0577582	0.0372269	0.0257242
axo00412-f_at	7.36214	6.8057	5.90096	5.54512	5.44374	5.831	5.82429	6.28273	6.48225	6.85797	6.5733	6.68914	7.57079	7.73837	7.87562	7.84192	8.30116	7.8996	7.92038	7.86345	0.0802023	0.104866	0.0961297	0.0747605	0.0923263	0.0712058	0.0740993	0.0918385	0.0962504	0.0601795	0.110052	0.105265	0.0459825	0.0681175	0.0656265	0.0902666	0.0896474	0.101912	0.0604822	0.0767705
axo00413-f_at	4.40947	4.10357	3.63437	3.62177	3.60471	3.6036	3.69004	3.91133	4.01883	4.00684	4.03864	4.22807	4.74554	4.93836	5.1468	4.99454	5.49008	5.21258	5.12169	5.1029	0.0828183	0.108344	0.0804493	0.0382267	0.0454032	0.0425884	0.058297	0.0731159	0.0915729	0.0922062	0.0675898	0.0992395	0.120639	0.126053	0.148415	0.130305	0.107375	0.131715	0.123691	0.114194
axo00414-r_at	10.7258	10.9829	10.8932	11.4962	11.6686	11.7714	11.9773	12.2205	12.1674	12.5755	12.6028	12.4076	12.4002	12.5672	12.5154	12.0907	12.1726	12.1518	11.9346	11.8208	0.0306851	0.0594826	0.0523222	0.0203602	0.0245523	0.0395103	0.0317598	0.0197434	0.044755	0.0158208	0.0319944	0.0367052	0.0398166	0.0153363	0.0186562	0.0409227	0.0307928	0.0261587	0.0276271	0.0473492
axo00415-f_at	11.6945	11.6721	11.6082	11.9289	11.9915	12.026	12.095	12.1904	12.1761	12.1597	12.1717	12.0964	12.0792	11.8899	11.7686	11.8918	11.9219	11.8225	11.8621	11.6286	0.0194592	0.018799	0.0141623	0.0193062	0.0111483	0.0230525	0.0126471	0.0117024	0.0151703	0.0167989	0.0211792	0.0168075	0.0239921	0.0240378	0.0236468	0.0276737	0.0218587	0.0255628	0.0220154	0.0347462
axo00416-r_at	3.44503	3.2928	3.31508	3.35063	3.34242	3.34592	3.28541	3.32621	3.29505	3.21422	3.25816	3.21114	3.20357	3.21798	3.26997	3.23671	3.1301	3.19587	3.16952	3.2338	0.0734224	0.0441486	0.0347472	0.0310861	0.0431489	0.0422765	0.052652	0.0541105	0.0500671	0.0392584	0.0582157	0.0373196	0.0252472	0.0393379	0.037985	0.037635	0.0327054	0.0285839	0.0277504	0.0282851
axo00417-f_s_at	8.28229	8.07564	8.14465	8.23716	8.15765	8.56707	8.92428	9.15226	9.05302	9.17003	9.3153	9.39681	9.47773	9.53056	9.69409	9.59276	9.60878	9.84429	9.75493	9.50111	0.0479196	0.07313	0.0823012	0.0623933	0.0663725	0.0246575	0.0309064	0.0268425	0.0347368	0.0284259	0.0283698	0.0269922	0.017501	0.0247462	0.0237469	0.0257308	0.0163089	0.0134845	0.0274406	0.0248741
axo00421-f_at	5.05735	4.55206	4.5341	4.77036	4.85708	4.8468	4.81567	4.92303	4.89072	4.81519	4.76287	4.84804	5.05788	5.10322	5.08985	5.07532	5.09846	5.09931	5.16664	5.14648	0.0606616	0.0435193	0.0491361	0.0445902	0.0634135	0.0516263	0.0452424	0.0321614	0.0531702	0.0491454	0.0492506	0.0319089	0.0321343	0.0465273	0.0510043	0.0633334	0.0385961	0.0674193	0.0421822	0.0421216
axo00422-r_at	8.59114	8.45505	8.30842	8.1921	8.33486	8.635	8.88189	8.95387	9.00536	8.91266	8.88782	9.09516	9.19712	9.29794	9.4026	9.17892	9.37928	9.28096	9.3343	9.14623	0.056836	0.04631	0.0630797	0.0612633	0.0520369	0.0552429	0.0482712	0.0448189	0.0558422	0.0411713	0.0518454	0.0628255	0.0367268	0.0557615	0.0402961	0.0226232	0.0283818	0.0474696	0.0367108	0.0475268
axo00423-f_at	10.7764	10.6007	10.5195	10.5518	10.4891	10.3939	10.4092	10.34	10.4022	10.3851	10.3486	10.3759	10.4437	10.5289	10.4762	10.4585	10.4848	10.3804	10.5286	10.4796	0.00896363	0.00857036	0.0165507	0.010669	0.0145005	0.00980939	0.0113717	0.0108945	0.0143136	0.00689719	0.00653932	0.00649275	0.0106663	0.00905583	0.00866061	0.0137665	0.0112807	0.00959464	0.0120472	0.00914413
axo00424-r_at	5.95534	5.96295	6.34207	6.5032	6.63528	6.29254	6.28356	6.28216	6.46829	6.55076	6.49501	6.48279	6.58218	6.54579	6.6464	6.5555	6.63155	6.71614	6.72944	6.83415	0.0374798	0.0514766	0.0377245	0.0402229	0.036049	0.0365067	0.0311138	0.0296733	0.0272037	0.0389164	0.0265673	0.0272496	0.029738	0.0326038	0.0106844	0.0366499	0.0301087	0.0402581	0.0358809	0.0446009
axo00427-f_at	8.22221	8.34679	8.33748	8.13417	8.07043	7.62678	7.93981	7.79341	7.72714	7.53446	7.69564	7.62032	7.56212	7.80597	7.67752	7.87295	7.74755	7.71331	7.77796	7.88892	0.0608004	0.0241556	0.0282703	0.0439742	0.0188621	0.0440866	0.018802	0.0230843	0.0324119	0.0358551	0.0262471	0.0239478	0.0443349	0.0230137	0.0374418	0.027986	0.0155414	0.026659	0.0371081	0.0253673
axo00428-f_at	8.31526	8.28741	8.46028	8.48404	8.50203	8.55562	8.49046	8.33274	8.15887	8.10751	8.15856	8.27047	8.19499	8.25811	8.14018	8.28244	8.30836	8.4165	8.44976	8.40948	0.0215246	0.0259994	0.0244588	0.0164734	0.0240631	0.0232949	0.0233465	0.0256648	0.0215165	0.0393301	0.0247365	0.0171785	0.0308839	0.0245297	0.0248271	0.0226003	0.0144569	0.0298396	0.0187531	0.0276649
axo00429-r_at	7.49838	7.27212	7.40958	7.56402	7.65772	7.76316	7.72829	7.67734	7.74909	7.70826	7.67591	7.68118	7.62181	7.4943	7.48767	7.3653	7.46149	7.47783	7.38714	7.49062	0.013567	0.020263	0.0217927	0.0206064	0.0253384	0.0242903	0.0192354	0.0268277	0.0324663	0.0342563	0.028258	0.0230924	0.0336655	0.0224262	0.0141588	0.0167325	0.0170593	0.0093475	0.0151822	0.0151867
axo00430-f_at	4.38458	4.4601	4.43482	4.46651	4.43207	4.37043	4.37014	4.32598	4.34106	4.38982	4.3657	4.359	4.38563	4.30512	4.40313	4.44001	4.43789	4.45101	4.45784	4.43939	0.0540738	0.0456127	0.0630275	0.0260427	0.0321785	0.0294326	0.0269024	0.0445141	0.0349374	0.0454692	0.0370495	0.0271279	0.0304083	0.0256368	0.031973	0.0530914	0.0218851	0.0348344	0.0333861	0.0402125
axo00431-f_at	7.79194	7.85054	7.66082	7.84323	7.84049	8.33779	8.18447	8.17094	8.19535	8.18174	8.43568	8.301	8.38116	8.30734	8.25438	8.24919	8.20855	8.20526	8.13884	8.00315	0.0397296	0.0360826	0.0354347	0.0160649	0.0134766	0.0201499	0.0391859	0.0401276	0.0316767	0.0202999	0.0165979	0.0208119	0.0188761	0.0355066	0.0201938	0.0219279	0.0310562	0.0270856	0.0367786	0.0442501
axo00432-f_at	10.6645	10.1735	9.86018	9.60212	9.61521	9.58142	9.59169	9.6275	9.51791	9.38295	9.012	9.05154	9.28455	9.15759	9.16524	8.92523	9.2029	8.89577	8.98702	9.14371	0.0221328	0.0476521	0.0454143	0.0392127	0.0472661	0.0357823	0.0360432	0.0480903	0.0462896	0.0412304	0.0599827	0.0720559	0.0328422	0.0389395	0.0286584	0.0634381	0.0581047	0.0399766	0.0402599	0.025956
axo00433-f_at	4.13318	4.38556	4.7561	4.78995	4.70466	4.69267	4.54897	4.76875	4.86058	4.56601	4.42747	4.46762	4.49016	4.39569	4.384	4.29084	4.33136	4.31221	4.14959	4.31253	0.0412245	0.0260354	0.0663859	0.0616712	0.0607143	0.0317016	0.0399638	0.0750981	0.0374274	0.0513689	0.0675645	0.0666167	0.0628425	0.039146	0.0529246	0.0390645	0.034747	0.0318686	0.0515592	0.0332614
axo00434-f_at	3.88488	3.90778	3.98663	4.03352	4.03204	4.04106	3.94335	3.90264	3.94818	3.95468	4.03864	3.99912	4.05964	3.94521	3.95513	4.00832	3.87414	3.95773	3.96638	3.97042	0.050513	0.0386677	0.0569159	0.0559586	0.0437591	0.045061	0.042342	0.0303463	0.0359505	0.0732321	0.0514114	0.0626676	0.0394198	0.0478978	0.034063	0.041526	0.0435601	0.0319112	0.0285073	0.0420667
axo00437-f_at	8.66597	8.6296	8.43192	8.44511	8.54789	8.60551	8.4956	8.52581	8.58204	8.56986	8.56979	8.60607	8.49013	8.46303	8.47955	8.30603	8.35586	8.35799	8.18501	8.25273	0.0186915	0.0226042	0.0236725	0.0149251	0.0206796	0.0186866	0.0187509	0.0203482	0.0167263	0.0139332	0.0197932	0.0222005	0.0251232	0.0144447	0.0203189	0.0414207	0.0360695	0.0253706	0.0205249	0.0151997
axo00438-r_at	5.53398	5.37982	5.36862	5.4951	5.296	5.32633	5.30804	5.37094	5.30239	5.32473	5.30454	5.51472	5.42389	5.51736	5.42063	5.36907	5.27165	5.39211	5.44947	5.47496	0.0663874	0.0718804	0.040297	0.0300712	0.0412031	0.0408328	0.0313401	0.03256	0.0350096	0.0300744	0.0431291	0.0426532	0.0487143	0.0584369	0.0258192	0.0426488	0.0335272	0.0344711	0.0236798	0.0376179
axo00439-f_at	4.89761	5.04127	5.37089	4.724	4.84104	4.70228	4.72496	5.05208	4.73607	4.5952	4.55849	4.60375	4.63164	4.62769	4.53825	4.57085	4.50377	4.54719	4.56856	4.64223	0.230229	0.195797	0.412334	0.0476601	0.0943219	0.0300934	0.0608458	0.2851	0.0893063	0.0385336	0.0273386	0.0484911	0.0437657	0.0404289	0.0271591	0.0237875	0.0239739	0.0635879	0.056743	0.0469898
axo00440-f_at	3.96911	4.01715	3.91116	3.94844	3.94568	3.8955	3.91084	3.89858	3.81961	3.92421	3.9169	3.91492	3.93505	3.96399	3.96223	3.82923	3.83308	3.89175	3.95758	4.06298	0.0333709	0.0518362	0.0326568	0.0414478	0.0432119	0.0506546	0.027043	0.0219326	0.041094	0.0340578	0.0680842	0.0299832	0.0325408	0.0331132	0.0344123	0.0411574	0.0487938	0.0417419	0.0425936	0.0633517
axo00441-f_at	5.74807	5.77427	5.72678	5.88013	5.81208	5.80005	5.83928	5.82154	5.72105	5.65191	5.6991	5.77691	5.78669	5.68126	5.75779	5.75064	5.73274	5.79007	5.80211	5.85693	0.0326659	0.0370099	0.0438136	0.0417974	0.0309114	0.0307568	0.0285308	0.0165372	0.0236586	0.0305139	0.0326961	0.0331038	0.0267451	0.0256663	0.0353732	0.0352362	0.0331791	0.0234386	0.0241204	0.0311423
axo00442-r_at	3.78293	3.88177	4.00917	4.01052	4.04233	3.8558	3.88224	3.88053	3.93217	3.95669	3.99916	3.99629	3.94506	3.99243	4.02129	4.06246	4.12481	4.00386	3.94378	3.97354	0.035873	0.054826	0.0586092	0.0421277	0.0414591	0.0214753	0.046579	0.0444263	0.0472267	0.0495273	0.0385506	0.0478782	0.0450075	0.0291998	0.024091	0.0348629	0.0219047	0.0393009	0.0473842	0.0542171
axo00443-f_at	4.60798	4.72849	4.69345	4.88104	4.98956	5.44289	5.30035	5.20695	5.05895	4.86854	5.36433	5.15026	5.05357	4.8864	4.64286	4.7203	4.67477	4.52196	4.51791	4.59661	0.0558891	0.0579521	0.0682984	0.0542425	0.0528737	0.128794	0.142495	0.0961867	0.0971145	0.0707987	0.065207	0.0487586	0.0959943	0.0495374	0.0436815	0.0659831	0.0375526	0.0437094	0.0411742	0.0504525
axo00445-f_at	11.1446	11.0834	11.2325	11.2744	11.3217	11.3647	11.4097	11.3594	11.4165	11.494	11.4745	11.5421	11.5259	11.6094	11.6074	11.5759	11.5104	11.5469	11.6544	11.6328	0.0177134	0.0231928	0.0175389	0.0150348	0.00972578	0.0144758	0.0127455	0.0123254	0.0117889	0.00705682	0.0117918	0.0156834	0.00642191	0.0135528	0.0093286	0.013344	0.0072323	0.0137269	0.0140453	0.0115397
axo00446-f_at	3.46849	3.47294	3.41903	3.56167	3.58505	3.63022	3.635	3.62143	3.72944	3.82446	3.96183	3.96609	3.94721	3.58884	3.60411	3.55902	3.64109	3.47148	3.523	3.62914	0.0480744	0.0249517	0.0332103	0.0289991	0.0278292	0.0467188	0.0619313	0.0250222	0.0522483	0.073504	0.0739374	0.062959	0.130988	0.036354	0.045257	0.0300503	0.0319974	0.0423118	0.0439626	0.0380294
axo00447-r_at	5.07385	4.60248	4.39389	4.34062	4.27412	4.18846	4.14788	4.0643	4.03045	3.98111	3.97538	3.95563	3.91897	4.03538	3.99932	3.91206	4.0129	3.94384	4.02831	4.04055	0.0275184	0.094575	0.0665786	0.0440543	0.0498047	0.0469412	0.0331369	0.0517998	0.0404088	0.0257028	0.0541728	0.025816	0.0371576	0.0322102	0.0400323	0.0469966	0.0309946	0.031426	0.0406263	0.0350435
axo00448-f_at	7.87032	8.03082	7.72855	7.38426	7.28691	7.45116	7.54432	7.62812	7.70606	7.62714	7.7718	7.77879	7.99693	8.03814	8.03253	8.03937	8.21975	7.79022	7.87715	7.93418	0.0300064	0.0385002	0.0221349	0.0427802	0.0513136	0.0304656	0.0237275	0.0298142	0.023982	0.0270679	0.0292449	0.0197799	0.0240174	0.0238458	0.0127208	0.0239159	0.0176152	0.0229438	0.0340405	0.0245202
axo00450-f_at	8.88812	8.68621	8.21139	7.57122	7.54429	7.73313	7.98914	8.37307	8.08024	7.94711	6.89961	7.08636	7.02229	6.29999	6.57942	6.31681	6.44752	7.1161	7.75428	8.00236	0.0697112	0.0741906	0.0600456	0.070537	0.0874116	0.0935209	0.0805315	0.0836795	0.095138	0.107119	0.126377	0.1647	0.118733	0.157965	0.108342	0.14755	0.125279	0.134789	0.0686122	0.0452032
axo00452-r_at	5.87419	5.81011	5.46218	5.35487	5.44	5.24911	5.37538	5.58032	5.88932	5.4895	5.32785	5.41494	5.576	5.40203	5.51327	5.46292	5.39533	5.51284	5.47947	5.24893	0.0230046	0.0222016	0.0776141	0.0267789	0.0540193	0.0794512	0.0900708	0.108409	0.0808543	0.0683273	0.065128	0.0654125	0.105555	0.048713	0.0724944	0.072006	0.113151	0.0703655	0.0571969	0.103054
axo00454-f_at	3.88125	3.83216	3.87542	3.75389	3.81615	3.74595	3.81516	3.75712	3.77927	3.75677	3.75991	3.83641	3.76324	3.81746	3.84376	3.75155	3.85019	3.73911	3.77807	3.82396	0.0453282	0.0494342	0.0399379	0.0405862	0.0431353	0.0481398	0.0218487	0.031702	0.0347476	0.0375919	0.0300638	0.0428853	0.0329916	0.0358691	0.0397515	0.0554931	0.0552074	0.0271339	0.0653426	0.0556986
axo00456-f_at	6.11911	5.96134	6.01273	5.87028	5.71065	5.66086	5.66033	5.71048	5.67981	5.74601	6.0235	6.01309	5.8711	5.80925	5.74179	6.01241	6.003	6.11357	5.92879	5.90215	0.102099	0.0675764	0.080987	0.0775842	0.0598913	0.0565444	0.0555835	0.0507306	0.0365464	0.0685571	0.0428815	0.052574	0.0335817	0.0354497	0.0693093	0.0734921	0.0594788	0.0410042	0.0486116	0.0283357
axo00457-r_at	8.97766	9.91223	10.0615	9.8562	9.96634	9.77565	9.53993	9.63206	9.78497	9.89326	10.2101	9.88586	9.94493	9.92482	9.91167	9.80052	9.77467	9.75078	9.80422	9.91246	0.0245958	0.0318401	0.0346446	0.0389301	0.03119	0.0313051	0.0293912	0.0208056	0.0359652	0.0277307	0.0201759	0.0372159	0.0261008	0.0240185	0.0228448	0.02895	0.0220978	0.0155934	0.0275651	0.0387896
axo00460-r_at	6.86881	6.95184	6.91371	6.84601	6.85837	7.35132	7.38387	7.47343	7.49	7.51728	7.58232	7.76275	7.68184	7.831	7.92669	7.67412	7.67793	7.7957	7.84029	7.8434	0.109866	0.0715613	0.0455733	0.0752586	0.0628319	0.0224858	0.0266274	0.0217396	0.0197245	0.0173157	0.02925	0.0258318	0.0140841	0.0297477	0.0212429	0.0358717	0.0172892	0.0152404	0.0286567	0.0187424
axo00462-f_at	5.30841	5.37449	5.33427	5.45092	5.26593	5.46763	5.45409	5.43773	5.48139	5.49089	5.51956	5.41543	5.34927	5.43265	5.35685	5.63838	5.57044	5.32207	5.32824	5.22274	0.0610314	0.0513377	0.0570377	0.031405	0.0443002	0.0470287	0.0490882	0.0299898	0.065309	0.0404666	0.0259965	0.0505054	0.0464957	0.0238927	0.031479	0.0613175	0.0531393	0.0649675	0.0451082	0.0455825
axo00463-r_at	5.25847	5.38238	5.19609	5.27057	5.24664	5.65636	5.57076	5.5686	5.48249	5.53048	5.74116	5.60052	5.448	5.47432	5.36733	5.69479	5.57359	5.45889	5.31503	5.07468	0.0630914	0.0846942	0.078765	0.0446965	0.0441311	0.0882102	0.0648518	0.0650803	0.0596368	0.0450443	0.0394548	0.0511505	0.0429096	0.0282121	0.0629389	0.0631893	0.0935494	0.0589805	0.0470193	0.070025
axo00466-r_at	4.60455	4.61326	4.48886	4.72199	4.47033	4.46034	4.27706	4.43737	4.36853	4.51637	4.5725	4.74512	4.65194	4.50563	4.77089	4.6848	4.67654	4.76836	4.75531	4.77847	0.0412147	0.06352	0.0410799	0.0517567	0.0473807	0.0454974	0.0366091	0.0428521	0.0501612	0.0394606	0.0396502	0.0359464	0.0433582	0.0605741	0.0385335	0.0682789	0.0512638	0.0419088	0.0477085	0.0468829
axo00467-r_at	3.83791	3.92779	4.1548	4.13678	4.09042	4.14963	4.15513	4.09796	4.17002	4.20808	4.10886	4.24747	4.23797	4.19864	4.14762	3.95949	3.97021	4.14287	4.0567	4.04047	0.0483159	0.0411172	0.0634774	0.056563	0.0502955	0.0335513	0.0410333	0.0374461	0.0368878	0.0388909	0.0252347	0.0637737	0.0513225	0.0409207	0.0365999	0.0462717	0.0518753	0.0376803	0.0343943	0.0310037
axo00468-f_at	9.37762	9.31307	9.28048	9.81896	9.64026	9.41836	9.46783	9.64761	9.54544	9.80211	9.95271	10.0755	9.80215	9.93845	9.80919	9.61847	9.63937	9.88009	9.74521	9.79017	0.0174167	0.0263901	0.0289027	0.0217167	0.0168269	0.0262564	0.0147211	0.0184355	0.0210737	0.0160941	0.0419101	0.0309272	0.0282909	0.016458	0.0252035	0.020725	0.0213911	0.0178094	0.0217975	0.0191961
axo00469-f_at	4.09636	4.13194	4.02553	4.2183	4.03655	4.00768	3.96598	4.00575	4.00257	3.90917	4.06678	4.06655	4.10149	4.08466	4.1527	4.09292	4.08871	4.16458	4.16804	4.21852	0.0414901	0.0270029	0.0294596	0.0452398	0.0343655	0.0471667	0.0242475	0.0260707	0.0233057	0.031941	0.0520348	0.0269603	0.0479344	0.0293514	0.0419981	0.0308972	0.0351689	0.0478387	0.0268714	0.0219487
axo00472-f_at	4.08844	4.70319	5.38444	5.28991	4.87744	4.75323	4.58629	4.30696	4.31888	4.61245	5.45824	4.38352	4.51129	4.64133	4.11395	4.63635	4.1352	4.14081	4.09773	4.27698	0.0609746	0.141338	0.207242	0.196542	0.170962	0.144902	0.151885	0.0598228	0.097141	0.160196	0.297822	0.132405	0.137124	0.33521	0.101526	0.194975	0.0787371	0.0909617	0.0592778	0.115584
axo00473-r_at	5.89272	5.83215	5.2732	5.48165	5.49409	5.76143	5.82712	5.94516	6.11898	5.82206	5.74759	5.86872	5.97191	5.9665	5.99423	5.89446	5.95667	5.97491	5.96421	5.89824	0.0360091	0.040266	0.0358924	0.068294	0.0482357	0.0374769	0.0607903	0.0634046	0.0636573	0.0346647	0.022961	0.0338136	0.045753	0.0411093	0.0489801	0.0332785	0.035698	0.0543589	0.0253595	0.0400964
axo00474-r_at	5.6143	5.55888	5.51056	5.49928	5.61122	5.69098	5.79073	5.90584	5.83336	5.76576	5.79934	5.91114	5.86236	5.85976	5.86027	5.79964	5.81059	5.81449	5.82394	5.696	0.0348895	0.0377791	0.0366114	0.0221555	0.036953	0.0321752	0.0185578	0.023393	0.0309731	0.0299074	0.0364835	0.0213186	0.0252497	0.0367643	0.0214566	0.0288035	0.0303783	0.0215962	0.0321994	0.036123
axo00475-f_at	6.89492	6.92189	7.33992	7.23714	7.33122	7.58332	7.46842	7.50044	7.66618	7.49304	7.54284	7.40583	7.23357	6.92773	6.99011	7.02183	6.81349	6.74788	6.65919	6.8618	0.0336066	0.0574683	0.0435789	0.0393541	0.0483582	0.042159	0.0408336	0.0321058	0.0339148	0.0464023	0.0689868	0.0492198	0.0750907	0.089478	0.0464701	0.0616649	0.0488399	0.0604029	0.0587865	0.0474675
axo00476-f_at	7.31099	7.05776	6.30578	5.83407	5.65872	5.87785	5.74462	5.94652	6.11976	6.00329	5.55577	5.62594	5.72666	5.84858	5.92489	6.04281	6.16617	5.98443	6.02491	6.22275	0.0547957	0.0806671	0.0492846	0.0652103	0.0698349	0.069473	0.0448178	0.0696874	0.0518739	0.0429396	0.0546181	0.0710951	0.0499707	0.058213	0.0442606	0.0670037	0.102545	0.0618157	0.072603	0.0467528
axo00477-r_at	3.65044	3.73585	3.65719	3.67091	3.67187	3.64476	3.67522	3.64398	3.62455	3.59217	3.78705	3.7222	3.67549	3.64344	3.58488	3.62552	3.63494	3.53076	3.64983	3.59785	0.0325642	0.0375414	0.0422585	0.0349176	0.0539679	0.0281735	0.021732	0.0417284	0.0530722	0.0448622	0.0351893	0.0247333	0.0265406	0.0432832	0.0239066	0.0552903	0.053431	0.0547436	0.0319776	0.0374525
axo00478-f_at	4.0601	4.04189	4.05529	4.09953	3.98099	4.00445	4.0906	4.11071	4.05816	4.06359	4.10969	4.18127	4.00515	4.1135	4.1084	4.1556	4.03135	4.14047	4.14349	4.03456	0.0356511	0.0544764	0.0400857	0.0462723	0.0399559	0.0446733	0.0286923	0.0468037	0.0229993	0.0345858	0.0336089	0.0322552	0.0444597	0.0533193	0.0377683	0.0361777	0.0369895	0.038158	0.0324141	0.030606
axo00479-f_at	4.09041	4.12401	4.11001	4.24312	4.15258	4.18597	4.16563	4.10547	4.12443	4.01351	4.20872	4.10788	3.98975	4.09771	4.17	4.0796	4.16657	3.99634	4.20004	4.11482	0.0358487	0.0558329	0.0395908	0.069099	0.0321563	0.0341064	0.0537505	0.0312599	0.0639458	0.0439268	0.0480137	0.0372728	0.0610471	0.039164	0.0393529	0.0287657	0.057188	0.0409067	0.0275213	0.0462276
axo00480-f_at	3.71977	3.74658	3.75499	3.78693	3.76798	3.82883	3.7855	3.78119	3.714	3.70477	3.67453	3.77565	3.81226	3.82428	3.75933	3.65179	3.66204	3.70604	3.74352	3.75579	0.0431534	0.0420149	0.0420194	0.0376501	0.0280435	0.0417116	0.064767	0.0389524	0.0515824	0.0381438	0.0506144	0.0367238	0.0645352	0.0471306	0.037837	0.0646902	0.0486149	0.0409497	0.0376527	0.0537028
axo00481-f_at	5.70277	6.10212	6.5344	6.67018	6.79085	6.57591	6.46702	6.49327	6.50854	6.60935	6.41829	6.28694	6.1693	5.99161	5.92546	5.88651	5.86366	5.89572	5.61195	5.32142	0.0526007	0.0324715	0.0436059	0.0483615	0.0247713	0.0689599	0.0437318	0.0453652	0.0603009	0.0448447	0.0458228	0.026025	0.0582846	0.0530284	0.038922	0.0527857	0.036707	0.0586585	0.0388128	0.0564419
axo00482-r_at	5.33648	5.2648	5.32026	5.06996	5.18157	5.32905	5.64196	5.63832	5.40888	5.4647	5.72157	5.77155	5.77786	5.69223	5.76365	5.45142	5.42793	5.59682	6.07364	5.94757	0.130489	0.0959903	0.126163	0.0964683	0.0911879	0.0733982	0.0972635	0.127289	0.123601	0.135998	0.162529	0.143594	0.123601	0.101964	0.081522	0.0885266	0.10109	0.110479	0.0949612	0.0878788
axo00483-f_at	4.37124	4.50871	4.40993	4.53057	4.3842	4.42335	4.35686	4.42482	4.42035	4.38492	4.37493	4.3544	4.36828	4.41898	4.33149	4.35264	4.3313	4.38928	4.4353	4.41126	0.0433617	0.0474144	0.0339875	0.0672617	0.0277141	0.0398782	0.036755	0.0417119	0.0404577	0.0551546	0.0418145	0.0368572	0.0335433	0.0489563	0.0324765	0.0750472	0.0365488	0.0529266	0.0396851	0.0386637
axo00484-f_at	3.22473	3.15351	3.24543	3.1694	3.18455	3.19827	3.23923	3.2243	3.23362	3.23161	3.29624	3.26152	3.26567	3.27331	3.25155	3.30907	3.21669	3.24722	3.1792	3.21411	0.0539757	0.0350984	0.045587	0.0333736	0.0210574	0.0390227	0.0388626	0.0267223	0.0242175	0.0412559	0.025429	0.0354369	0.0293774	0.0375557	0.0399599	0.0500783	0.0421027	0.0565746	0.0312639	0.0186451
axo00485-f_at	3.67643	3.73762	3.73769	3.78633	3.81874	3.72651	3.7089	3.71774	3.77332	3.67475	3.71708	3.7122	3.72614	3.71086	3.7778	3.72093	3.78369	3.79916	3.75306	3.83061	0.0351201	0.0415962	0.0181058	0.0364864	0.0382428	0.0626249	0.0336888	0.0306604	0.0329714	0.0354102	0.0546178	0.0311174	0.0466782	0.0244696	0.0415378	0.0618314	0.0399877	0.0312113	0.0402864	0.0512744
axo00486-f_at	3.15533	3.12425	3.15751	3.12555	3.0892	3.11506	3.00638	3.00802	3.04509	3.08141	3.11936	3.03472	3.07219	3.00594	3.03115	3.00869	3.02655	3.13972	3.06861	3.06327	0.0428416	0.0310062	0.0343265	0.0310345	0.0276541	0.0426094	0.0416229	0.0382224	0.0284791	0.0345454	0.0322289	0.0319229	0.0317968	0.0244703	0.0272525	0.0371413	0.050862	0.0344927	0.0333265	0.0506135
axo00487-r_at	3.85437	3.93936	3.84365	3.93303	3.91149	3.82763	3.89434	3.80799	3.80447	3.86462	3.83091	3.8963	3.86787	3.85812	3.84282	3.90225	3.8338	3.85247	3.90307	3.94254	0.0219703	0.0250876	0.0136515	0.0324389	0.0301663	0.0389093	0.0323587	0.0380381	0.0314534	0.0521823	0.0292727	0.0365897	0.0338083	0.0363491	0.0377359	0.035432	0.0531212	0.0408514	0.0385158	0.0251434
axo00488-f_at	3.74243	3.84249	3.71928	3.7896	3.81007	3.76039	3.67705	3.74773	3.70064	3.82802	3.75199	3.79664	3.80349	3.72217	3.6831	3.7921	3.69038	3.72029	3.77839	3.77234	0.017582	0.0297607	0.0391245	0.0314887	0.0423793	0.0111987	0.0227833	0.0333881	0.0372373	0.0447995	0.0291182	0.0370563	0.0388694	0.077874	0.0359692	0.0377083	0.0384359	0.031537	0.0332122	0.0429332
axo00489-r_at	3.90449	3.93735	3.80858	3.90857	3.91059	3.88324	3.78851	3.77016	3.8019	3.79679	3.79546	3.7462	3.73067	3.76214	3.74518	3.8011	3.77932	3.83259	3.79452	3.81648	0.0499186	0.0460472	0.0445194	0.0335829	0.0442174	0.0414708	0.0335281	0.0346097	0.0450155	0.0511022	0.043285	0.0214387	0.0370974	0.0147268	0.0437638	0.0504193	0.044095	0.0267411	0.0476912	0.0496938
axo00490-f_at	3.00402	2.99559	2.99274	2.95948	2.91944	2.86076	2.86056	2.86375	2.85696	2.89627	2.90891	2.93097	2.8825	2.9116	2.94982	2.98028	2.93637	2.95731	2.94365	2.95415	0.0383364	0.052634	0.036051	0.0530639	0.0345753	0.0275606	0.0427711	0.0378882	0.0238009	0.0285279	0.0159807	0.0208057	0.0295716	0.0398038	0.039533	0.0338357	0.0345991	0.0431299	0.0303287	0.0293335
axo00492-f_at	9.35032	9.22453	9.16202	9.09279	9.21852	9.42551	9.53528	9.53245	9.39231	9.43041	9.48703	9.48618	9.52598	9.44053	9.31592	9.38572	9.31814	9.4632	9.47578	9.45238	0.021081	0.02253	0.0383695	0.0241929	0.02168	0.0151698	0.0187484	0.0228156	0.0160634	0.0184175	0.019064	0.0191895	0.0291136	0.0310109	0.0118249	0.0176944	0.021161	0.0146802	0.0144691	0.0129397
axo00493-r_at	9.65721	9.44858	9.3472	9.3238	9.4887	9.72341	9.86533	9.90749	9.90937	9.90792	9.88052	9.88402	10.008	9.99565	9.98874	9.97545	9.96089	9.98124	9.99126	9.92272	0.0305687	0.0291222	0.0364404	0.0284277	0.0202503	0.0193711	0.0128353	0.0157238	0.0154612	0.0129896	0.0129892	0.0141766	0.0111216	0.0118977	0.00873214	0.010449	0.0111257	0.00936106	0.0116569	0.0151111
axo00495-f_at	5.03469	5.13833	5.28236	5.24931	5.18309	5.13958	5.1949	5.12852	5.04355	5.10272	4.99603	5.10458	5.02277	5.013	4.97497	4.94058	4.88788	4.82516	4.8928	4.95464	0.0396459	0.0347977	0.0623155	0.0352745	0.044964	0.0364373	0.0273066	0.0208367	0.028437	0.0359041	0.0247203	0.027214	0.0429125	0.0596626	0.0306001	0.0411655	0.027193	0.0538147	0.0273035	0.0307068
axo00498-f_at	4.56521	4.58455	4.39906	4.26676	4.29739	4.30715	4.30759	4.42949	4.26098	4.10696	4.01912	4.01841	4.0446	4.00267	4.08518	4.07346	3.94379	4.02226	3.92796	3.94564	0.0794694	0.0493778	0.0554938	0.0772819	0.0611295	0.053519	0.0651623	0.0526807	0.0401077	0.0263079	0.046801	0.0428544	0.0454343	0.0614386	0.0301921	0.0287483	0.026227	0.0481749	0.045892	0.0540596
axo00499-r_at	4.26119	4.22816	4.24505	4.20029	4.22966	4.24126	4.2467	4.12959	4.21035	4.17915	4.19576	4.1004	4.08253	4.11458	4.16972	4.09014	4.05794	4.00402	4.0799	4.0302	0.0477696	0.0318651	0.0366219	0.0402245	0.0411854	0.0324188	0.0313062	0.0213729	0.0446578	0.0374748	0.028472	0.0274596	0.0229707	0.0360316	0.0398998	0.0341478	0.0336817	0.043342	0.0308188	0.0259267
axo00500-f_at	3.71795	3.69446	3.75635	3.81907	3.68006	3.60009	3.65654	3.63439	3.61044	3.61064	3.59146	3.60479	3.5889	3.55229	3.55117	3.64104	3.6177	3.59023	3.55079	3.66021	0.0440913	0.0325029	0.0274582	0.0353675	0.0530717	0.0297845	0.0309786	0.0401573	0.049123	0.027707	0.0314425	0.0437683	0.0389128	0.0326204	0.0422068	0.0413543	0.0262274	0.0310061	0.0359369	0.0421033
axo00502-f_at	5.04609	5.12676	5.06205	5.12087	5.08271	5.10514	5.0126	5.01762	4.96286	5.0537	5.20888	5.07204	5.02066	5.03119	5.05381	5.16303	5.19355	5.12452	5.08612	5.1603	0.0527684	0.0387028	0.025317	0.0365024	0.0446609	0.0312044	0.021275	0.0355537	0.0415885	0.0379622	0.0445079	0.0375818	0.027412	0.0410037	0.0388828	0.0348401	0.0248311	0.0264363	0.0287019	0.0237656
axo00504-f_at	8.63695	8.41905	8.22378	7.81071	7.83496	7.53037	7.36814	7.58515	7.57352	7.81973	7.47263	7.55651	8.09131	8.38653	8.59306	8.28353	8.57625	8.55659	8.6239	8.55876	0.0410061	0.0381896	0.0334161	0.0294369	0.0467131	0.0201652	0.0358747	0.0365068	0.0537586	0.0289858	0.039297	0.0767846	0.0367338	0.0328213	0.0402005	0.0841492	0.0947994	0.0552575	0.0354588	0.0469693
axo00505-f_at	5.59533	5.6564	5.34534	5.18374	5.14427	4.79137	4.79358	4.80731	4.93509	4.89409	4.67405	4.63377	4.7448	4.69208	4.57498	4.64915	4.59785	4.56978	4.63833	4.91369	0.117758	0.11158	0.115433	0.102089	0.0965038	0.0939346	0.0864642	0.0414509	0.100021	0.129438	0.110108	0.0841621	0.0954953	0.0841944	0.056504	0.0881246	0.075269	0.0564507	0.0550283	0.0735273
axo00507-f_at	7.04996	6.81706	6.66388	6.39559	6.51942	6.73803	7.10008	7.20222	7.23713	7.05698	7.06908	7.19615	7.32143	7.36722	7.27534	7.3661	7.45433	7.17283	7.28428	7.20228	0.0240454	0.0117218	0.0263877	0.0450567	0.0438642	0.0395901	0.0279772	0.0257777	0.0287755	0.0329795	0.0287988	0.0310044	0.0336862	0.026999	0.0175754	0.0183164	0.0369857	0.0278925	0.0176782	0.0237488
axo00508-r_at	3.38342	3.37026	3.32379	3.35303	3.39538	3.36653	3.39015	3.44184	3.37876	3.45092	3.33111	3.36281	3.27517	3.37793	3.48275	3.35146	3.37185	3.43914	3.4029	3.45268	0.0497422	0.0385844	0.0199077	0.0219075	0.0372887	0.0285033	0.0335426	0.0412983	0.0310487	0.0319329	0.0197814	0.0363439	0.0452321	0.0327636	0.034882	0.0268375	0.0454355	0.0479996	0.0443608	0.0333222
axo00509-f_at	9.80224	9.49651	9.48885	9.08309	9.26689	9.63318	9.83439	9.98178	10.0079	9.85581	9.82167	9.74917	9.89436	9.98711	10.0366	10.0963	10.077	9.91346	10.0294	9.88357	0.0218864	0.0331099	0.0353058	0.0386084	0.0310121	0.0171116	0.00944752	0.0159225	0.0187342	0.0157179	0.014737	0.00936395	0.0131846	0.0216439	0.0173792	0.0170711	0.0132375	0.0116025	0.00842407	0.00994744
axo00510-f_at	9.35047	9.23117	9.5857	9.4199	9.08452	8.39596	8.50285	8.28717	7.39438	7.42102	6.82152	6.77003	6.51764	6.44347	6.24343	5.3333	5.46369	5.54177	5.26561	5.07275	0.0668061	0.0696765	0.109149	0.0808272	0.0874485	0.0723059	0.0442537	0.119401	0.0699378	0.0976971	0.107026	0.112355	0.125475	0.139335	0.17089	0.110124	0.112067	0.162022	0.172371	0.0882564
axo00511-f_at	4.89742	4.81288	4.76976	4.84887	4.78491	4.98368	5.00134	4.95392	5.06679	5.25132	5.22593	5.3905	5.31398	5.34962	5.31508	5.36242	5.31146	5.37942	5.27608	5.11813	0.0730261	0.0453465	0.0638677	0.0560641	0.0560847	0.0314562	0.0356402	0.040213	0.0432274	0.0613262	0.0499792	0.0746386	0.0316601	0.0344751	0.0210635	0.0570649	0.0573326	0.0233746	0.0368503	0.0367822
axo00512-f_at	4.19635	4.18853	4.08149	4.10754	4.09135	4.07049	4.08955	3.9919	4.07559	4.0147	4.10529	4.21331	4.05976	4.07298	4.13322	4.13731	4.16402	4.15336	4.16244	4.03298	0.0247006	0.0369439	0.0468185	0.0353639	0.0335091	0.0359448	0.0307897	0.0302341	0.0341939	0.0467876	0.0510357	0.0402841	0.0500957	0.0439302	0.0250085	0.0217405	0.0506642	0.0327813	0.0450255	0.0365259
axo00513-r_at	9.72865	9.49872	9.44143	9.46114	9.50105	9.78684	10.0199	9.99392	9.8875	9.70518	9.59914	9.56562	9.74058	9.69637	9.71693	9.56861	9.58425	9.50913	9.55235	9.36412	0.0172212	0.016893	0.0193658	0.0239783	0.0192308	0.0231366	0.0101007	0.0180213	0.0253546	0.023756	0.0226624	0.0313132	0.0192328	0.0220149	0.0128177	0.0178049	0.0220582	0.015038	0.0185118	0.023064
axo00515-f_at	4.66014	4.57932	4.57631	4.77412	4.77982	4.87634	4.79893	4.70528	4.75393	4.76719	4.80884	4.74573	4.7422	4.87454	4.7876	4.87338	4.76119	4.73963	4.75749	4.82561	0.0320015	0.0394441	0.0408349	0.0421594	0.0430275	0.0434274	0.0206606	0.0363953	0.0486662	0.0255258	0.0434145	0.0266234	0.0274399	0.0451343	0.0385861	0.0497482	0.0454143	0.0425466	0.0371406	0.0637053
axo00517-f_at	4.31956	4.42683	4.22144	4.35976	4.33412	4.15216	4.28249	4.14077	4.18642	4.18525	4.35784	4.2172	4.06942	4.06423	4.16151	4.16224	4.06202	4.03507	4.15135	4.09211	0.0653815	0.036399	0.0664944	0.0657591	0.0470829	0.0735863	0.0462652	0.039348	0.0692507	0.0564052	0.0444615	0.0534372	0.0688593	0.106027	0.0355868	0.0429591	0.0381561	0.0579126	0.0497675	0.0656202
axo00518-f_at	5.63547	6.72527	6.39448	6.08567	6.06907	6.05155	5.9547	6.0475	6.29173	6.41216	6.33665	6.21854	6.17058	6.34318	6.37213	6.0288	5.95279	6.16906	6.17916	6.19618	0.0662094	0.0221576	0.0500832	0.0570172	0.0444597	0.0396242	0.0519906	0.0448164	0.0531469	0.0621355	0.051203	0.0622599	0.0598949	0.0256466	0.0898488	0.0417614	0.0402623	0.0599365	0.0318612	0.0663751
axo00519-r_at	4.56931	4.29803	4.27936	4.2788	4.30627	4.15303	4.16149	4.0625	3.98082	3.96274	3.99467	3.91899	3.8647	3.87809	3.91736	3.98711	4.05219	4.00725	4.10537	4.08083	0.0707093	0.0436793	0.050058	0.0447194	0.0364317	0.0287272	0.0328073	0.0474788	0.031775	0.0316181	0.0496027	0.036553	0.0357138	0.0367507	0.0433223	0.0308529	0.0172763	0.0358429	0.0387768	0.0234477
axo00520-f_at	5.9717	5.66662	5.90827	5.84043	5.97117	6.25591	6.4503	6.76703	6.76525	6.82874	6.65168	6.74749	6.90358	6.92458	6.88639	7.2461	7.17239	7.29332	7.0935	7.01659	0.0597324	0.108543	0.112667	0.101687	0.0808748	0.0815604	0.0494015	0.0323947	0.0446024	0.0531674	0.0342	0.0444726	0.0191757	0.0397599	0.0386317	0.0353885	0.0522338	0.0483732	0.0268265	0.0533377
axo00523-f_at	4.59117	4.78295	4.83203	4.49737	4.39694	4.60793	5.28344	5.51699	5.39942	5.02702	5.11279	5.05639	5.57761	5.59795	5.6662	5.84407	5.88187	5.89516	5.99488	5.70098	0.077731	0.10931	0.107958	0.0638764	0.0596915	0.0804439	0.0715869	0.0618291	0.0430176	0.0536611	0.0599561	0.041633	0.0397442	0.0575697	0.0355939	0.0735662	0.0757888	0.0372979	0.0458171	0.0288522
axo00525-r_at	11.7234	11.7424	11.8033	11.8558	11.8399	11.9903	12.0769	12.1296	12.2669	12.3988	12.4832	12.4753	12.4246	12.4831	12.4716	12.4531	12.4252	12.3918	12.353	12.384	0.0116848	0.0235296	0.0247802	0.0161121	0.0235155	0.0135785	0.0106043	0.0156567	0.019145	0.0104859	0.0145144	0.0144871	0.0139638	0.0143292	0.00789729	0.00975312	0.0109315	0.0146602	0.0107942	0.00942687
axo00526-f_at	5.7567	5.74721	5.78843	5.73074	5.73554	6.43003	6.38952	6.38981	6.53448	6.73548	6.82834	6.96804	6.89237	6.92249	6.81774	6.69324	6.54385	6.48717	6.40015	6.3937	0.114771	0.104552	0.0722064	0.0910633	0.12494	0.0523633	0.0502347	0.0661237	0.0591952	0.0464343	0.0730005	0.0760297	0.067024	0.0669897	0.0641286	0.0625207	0.0566853	0.0558276	0.0438637	0.0525747
axo00527-r_at	8.28305	8.28141	8.20282	8.12458	8.52281	8.89587	8.86183	8.85562	8.851	8.74737	8.649	8.59694	8.8041	8.68105	8.71022	8.6701	8.69846	8.80013	8.70038	8.46981	0.0227524	0.037931	0.0487264	0.0247074	0.0236656	0.0271036	0.0236935	0.0292165	0.0285138	0.0169432	0.0273043	0.0169909	0.0306416	0.0307798	0.0143815	0.0162649	0.0202313	0.0252239	0.0155403	0.0268292
axo00529-r_at	4.1922	4.2252	4.1542	4.2253	4.19486	4.18163	4.25028	4.20799	4.24905	4.25432	4.3201	4.21172	4.19446	4.25709	4.33121	4.26645	4.20432	4.25085	4.35739	4.33794	0.0360534	0.0241872	0.0441727	0.0458628	0.043075	0.0388333	0.0270647	0.0454621	0.053202	0.0479545	0.0377298	0.0549975	0.0436789	0.039582	0.0302937	0.051674	0.0550654	0.0332187	0.0258393	0.0226996
axo00530-f_at	8.09272	8.0636	8.22223	8.07144	7.99419	7.93444	7.93376	7.98378	8.16888	8.11312	8.274	8.24544	8.31742	8.4674	8.42753	8.48993	8.5109	8.37488	8.51619	8.54568	0.0257061	0.0273841	0.0218669	0.0170428	0.0301835	0.0185889	0.015342	0.0184989	0.0237065	0.0217429	0.0144791	0.0160747	0.0191213	0.0192044	0.0124206	0.0184547	0.0128904	0.0112004	0.0170111	0.0134881
axo00532-f_s_at	7.77049	7.93846	8.38444	8.38984	8.33225	8.36508	8.34211	8.37124	8.43319	8.50964	8.59174	8.458	8.39063	8.60821	8.62301	8.67523	8.68887	8.54804	8.71516	8.61783	0.0642456	0.0548323	0.0313027	0.03444	0.0498315	0.0266854	0.0268722	0.0193388	0.0185344	0.0162606	0.0199227	0.0295797	0.0381033	0.0299148	0.0166632	0.0237887	0.0379988	0.0219325	0.0247722	0.0179124
axo00533-f_at	6.58642	6.51432	6.60898	6.31337	6.0759	5.7226	6.03288	6.17664	6.27608	6.14903	6.18046	6.14516	6.26121	6.39325	6.60061	6.49406	6.68274	6.62202	6.70234	6.74244	0.0655842	0.0620461	0.0498209	0.0380676	0.0460416	0.0494135	0.0353922	0.0369288	0.0628412	0.0395597	0.027103	0.0281093	0.0305971	0.0258687	0.0252798	0.0356812	0.0321393	0.0316709	0.0238329	0.0312557
axo00534-r_at	4.06069	4.02843	4.10955	4.16424	3.95099	3.98503	4.1229	4.0469	4.12719	4.06726	4.09436	4.09157	4.12833	4.09044	4.16025	4.1128	4.03195	4.18894	4.14016	4.22798	0.0516745	0.0560524	0.0485414	0.0373161	0.0445246	0.0384542	0.0425379	0.045905	0.0536399	0.0653348	0.0539979	0.04109	0.0431255	0.0395854	0.0569387	0.0439869	0.0733187	0.0293149	0.0489798	0.0574721
axo00535-f_at	9.932	10.0042	10.239	10.31	10.4712	10.5954	10.6506	10.5538	10.3283	10.4725	10.3405	10.5566	10.6272	10.5595	10.5796	10.6535	10.4805	10.7629	10.751	10.5588	0.0235126	0.0323859	0.0219712	0.018015	0.00753053	0.0317673	0.0280184	0.0302373	0.0291034	0.0156408	0.0302606	0.0179868	0.0152835	0.0250942	0.0324318	0.0201766	0.0304478	0.0246006	0.0149335	0.0188029
axo00555-f_at	13.6618	13.2985	13.0251	12.7736	12.7452	12.5545	12.3143	11.9447	11.5432	9.31934	7.67587	7.07039	6.97521	5.10304	4.20797	4.58188	3.80708	3.7861	4.18027	3.94754	0.00639216	0.0275036	0.0316126	0.0407935	0.043228	0.030155	0.0336436	0.093074	0.0620601	0.279784	0.301697	0.459161	0.336714	0.220451	0.206879	0.330348	0.063115	0.0391687	0.310713	0.0909876
axo00592-f_at	8.86817	7.91347	6.5369	7.33599	7.08458	6.9596	6.41492	5.94942	5.08055	4.65411	4.45115	4.60498	4.22154	3.9954	3.95069	3.9481	3.94854	3.89684	3.98081	3.99315	0.119934	0.221094	0.242124	0.16543	0.161014	0.326684	0.322656	0.297074	0.156506	0.171212	0.126023	0.180516	0.0841537	0.0404358	0.0387872	0.0489573	0.0280016	0.0300963	0.0194675	0.0586043
axo00595-f_at	8.15954	7.17096	6.0528	6.66996	6.21711	6.39144	5.76441	5.27177	4.57118	4.01195	3.76201	3.9553	3.54292	3.45837	3.46399	3.44733	3.33946	3.39753	3.40609	3.42516	0.127167	0.239733	0.221466	0.166238	0.155622	0.326236	0.351007	0.335447	0.210185	0.229702	0.118849	0.205115	0.0513708	0.0505347	0.0456887	0.0438802	0.02805	0.0341883	0.0455797	0.0524338
axo00600-f_at	12.0746	11.502	10.5599	10.6976	10.4555	11.1095	10.6809	10.1103	9.6998	7.67233	6.11262	5.94378	5.62848	4.05565	3.78854	3.89053	3.59613	3.5853	3.69159	3.60768	0.0460762	0.0536003	0.100219	0.0935939	0.083272	0.0614722	0.062478	0.129997	0.101937	0.32291	0.303309	0.437029	0.319076	0.16159	0.121673	0.14779	0.0343727	0.0541754	0.156901	0.035837
axo00607-f_at	5.86538	5.16326	4.37301	4.56229	4.1708	5.18115	4.4582	4.14527	3.69916	3.47781	3.44839	3.43073	3.37005	3.32354	3.35003	3.35006	3.36766	3.28392	3.33327	3.32637	0.217274	0.372409	0.248022	0.152779	0.0881342	0.290425	0.251394	0.213497	0.0711375	0.0436658	0.0481477	0.0659759	0.0433141	0.0330184	0.0390335	0.0480203	0.0406337	0.0229555	0.0313377	0.033427
axo00610-f_at	7.41377	7.42441	7.04563	7.68235	7.64467	8.17969	7.9755	7.85102	7.79283	7.85723	8.45908	8.30644	8.22002	8.06702	7.74359	8.57088	8.46416	8.22868	7.94504	7.45113	0.064732	0.0781142	0.082683	0.0500421	0.0412237	0.0935537	0.108942	0.102118	0.0899565	0.0713337	0.0222954	0.0173741	0.0338084	0.0435347	0.0588973	0.0380986	0.049284	0.0663784	0.0518455	0.0662442
axo00611-f_at	3.69773	3.72681	3.70555	3.61188	3.67595	3.55819	3.56296	3.52113	3.66993	3.66178	3.55011	3.60048	3.64989	3.66818	3.61231	3.59778	3.58914	3.6104	3.6528	3.75482	0.0529936	0.0444	0.049403	0.032594	0.0428175	0.0338871	0.0411843	0.0287695	0.0425593	0.0395613	0.0506751	0.0354716	0.0247445	0.0390369	0.034486	0.0308769	0.0456766	0.0281113	0.0520567	0.0560614
axo00612-f_at	3.82516	3.77581	3.6651	3.82443	3.8404	3.79661	3.76377	3.7749	3.85928	3.72134	3.77415	3.80829	3.85477	3.83979	3.88902	3.89577	3.88258	3.80379	3.81702	3.74346	0.0265808	0.0383434	0.0508298	0.0619309	0.0294616	0.0407156	0.038449	0.0475695	0.0436664	0.0418735	0.0394551	0.0380323	0.0362037	0.0446056	0.0318645	0.046717	0.0567603	0.0331001	0.0397335	0.0489653
axo00613-f_at	7.54856	7.61658	7.53368	7.31022	7.32283	7.44291	7.49324	7.49841	7.58462	7.53937	7.80456	7.77735	7.85016	7.96081	7.97303	8.03412	8.04588	8.14125	8.1022	8.09737	0.0221486	0.0184228	0.0425592	0.0372618	0.0345238	0.0226593	0.0284052	0.031129	0.0316563	0.0270137	0.0290792	0.0245519	0.0184035	0.0215426	0.0118401	0.0239426	0.0184149	0.016963	0.0179991	0.0132744
axo00614-f_at	4.92517	4.60167	4.34792	4.17514	4.118	3.99405	3.81855	3.78158	3.83045	3.84414	3.81291	3.61047	3.77565	3.73488	3.79171	3.68924	3.80124	3.8138	3.95374	3.94002	0.0635873	0.100696	0.087477	0.105951	0.0907721	0.0608321	0.0593645	0.0442979	0.0643359	0.033579	0.0465834	0.0329003	0.0457961	0.0545359	0.0393748	0.0435407	0.0789971	0.0620816	0.0659197	0.0732391
axo00615-f_at	5.95207	5.46306	5.11606	4.86726	5.12921	5.16509	5.13752	4.92736	5.40199	5.35468	5.14265	5.23142	5.15182	5.35029	5.29621	5.23884	5.3475	4.93751	5.18635	5.20232	0.0431906	0.0742156	0.0745526	0.0576753	0.0728503	0.0402839	0.068533	0.0388594	0.0467031	0.0700813	0.0375985	0.0686786	0.0512165	0.0693735	0.0604861	0.0465346	0.0557866	0.052979	0.0309928	0.0793757
axo00618-f_at	4.29404	4.11061	3.91048	3.8335	3.85804	3.91942	4.02745	3.879	4.02747	4.08968	3.90236	3.92664	4.16511	4.23518	4.25356	4.36063	4.50633	4.18365	4.23508	4.21464	0.0735131	0.0423105	0.051845	0.0567699	0.0484911	0.0583406	0.0453923	0.0305721	0.0448869	0.0545738	0.0350971	0.0386328	0.0548193	0.0617691	0.0461474	0.0482956	0.0595963	0.0365208	0.0519803	0.0390523
axo00619-r_at	3.98078	3.80581	4.06928	4.20261	4.28064	4.17319	4.23271	4.27882	4.35963	4.3611	4.3637	4.58401	4.47113	4.51648	4.60829	4.77662	4.94285	4.71709	4.47755	4.57632	0.0649466	0.0512723	0.0334176	0.0413122	0.0783402	0.0536041	0.043972	0.0251201	0.0542173	0.0618098	0.0581033	0.0578797	0.056748	0.0743632	0.0613364	0.0921346	0.0685572	0.0595385	0.0646046	0.0784995
axo00620-f_at	5.03881	4.53647	4.87001	4.92471	5.12113	5.06493	5.11679	5.07952	5.01823	5.13117	5.15072	5.02767	5.21685	5.25113	5.21814	5.4271	5.54032	5.22985	5.26773	5.48747	0.0442302	0.0470885	0.0680537	0.0532076	0.0667467	0.0783414	0.0767271	0.0472056	0.0510733	0.0325535	0.0445461	0.0413582	0.0371545	0.0608286	0.034338	0.0698541	0.0632147	0.0291749	0.0204966	0.0520046
axo00622-r_at	6.72584	6.10365	5.61129	5.69184	5.92951	5.95135	6.22907	6.31003	6.23114	6.24032	5.92556	6.1525	6.44557	6.29902	6.47026	6.60377	6.71626	6.54682	6.44755	6.31613	0.0528013	0.0659382	0.0681005	0.0470579	0.0840562	0.0775612	0.0625157	0.0439905	0.0958733	0.0716186	0.0426565	0.0571139	0.0350163	0.0558724	0.0603802	0.0418547	0.0568334	0.0269618	0.03495	0.0522131
axo00623-f_at	4.13449	4.14748	4.13331	4.15117	4.17651	4.15522	4.1341	4.14714	4.20041	4.23676	4.13981	4.19974	4.27603	4.20927	4.25226	4.23728	4.20514	4.31176	4.34267	4.35461	0.0293186	0.033031	0.0309646	0.0296559	0.0396008	0.0569942	0.0301578	0.0399767	0.0295502	0.023011	0.0365433	0.0348047	0.0421093	0.0409022	0.0238932	0.0470348	0.0448183	0.0368445	0.0420157	0.0465314
axo00624-f_at	4.11804	4.39564	3.87254	3.96136	4.00265	4.19982	4.21858	4.1517	4.23	4.20849	4.14128	4.1074	4.43265	4.24147	4.21377	4.44391	4.47734	4.36181	4.36386	4.07623	0.0304069	0.060308	0.0406677	0.0248391	0.0527772	0.0573255	0.0442237	0.0702252	0.0498656	0.0797439	0.03751	0.0274139	0.0483529	0.0534314	0.0554533	0.0662863	0.0646083	0.0618002	0.0744281	0.0587584
axo00626-f_at	4.67555	4.46742	4.23819	4.08556	3.9227	3.77612	3.91153	3.96454	4.1134	4.23785	4.1437	3.96217	4.34195	4.34114	4.38009	4.74765	4.61607	4.57282	4.58014	4.77243	0.0655728	0.04849	0.078782	0.0636123	0.0690425	0.0742756	0.0283443	0.0770573	0.0817763	0.0676668	0.0609706	0.0914615	0.0807069	0.0430011	0.100885	0.082902	0.0935399	0.0618395	0.0360746	0.0681919
axo00628-f_at	3.47749	3.53929	3.44948	3.57272	3.53679	3.48164	3.57706	3.52061	3.49998	3.62799	3.53492	3.55543	3.52736	3.63205	3.5826	3.51496	3.49299	3.54625	3.58129	3.61743	0.0332379	0.0255156	0.0311981	0.0326178	0.0481259	0.0378713	0.0389507	0.0472636	0.0461257	0.0411551	0.0378379	0.0214829	0.036484	0.0451576	0.0243143	0.0318291	0.0361611	0.034036	0.0219281	0.0413394
axo00629-f_at	9.46202	9.98601	10.3664	10.495	10.3811	10.1527	10.0946	10.1157	10.2211	10.3274	10.3015	10.2699	10.221	10.1794	10.2899	10.2127	10.1493	10.2004	10.1497	10.2678	0.0254784	0.0283732	0.0213134	0.0162184	0.0167525	0.0150746	0.0206144	0.0148643	0.0193985	0.00705442	0.022674	0.017282	0.0168706	0.0140783	0.01434	0.012669	0.0148904	0.0100467	0.0136442	0.0276278
axo00630-f_at	5.28419	4.77753	4.14634	3.68677	3.56597	3.6124	3.61584	3.89858	4.02836	4.08696	3.93748	3.97939	3.98993	3.75096	3.68623	3.7968	3.77973	3.61488	3.9162	4.19069	0.126301	0.10877	0.087962	0.0385948	0.0440469	0.0624955	0.045215	0.100628	0.130529	0.141617	0.110935	0.132882	0.0530284	0.128157	0.0824208	0.102062	0.0869679	0.0706649	0.0872042	0.0865951
axo00631-r_at	3.67828	3.7341	3.74456	3.79239	3.79265	3.80277	3.71405	3.66024	3.76552	3.79987	3.84353	3.68782	3.75059	3.78074	3.74731	3.80119	3.9187	3.83766	3.88608	3.86687	0.0235337	0.0207777	0.0394208	0.0360333	0.0210228	0.0304206	0.0244834	0.026902	0.0368599	0.0597614	0.0345753	0.0350777	0.031614	0.0214418	0.0255136	0.0246762	0.0311156	0.0414425	0.0442118	0.0464184
axo00632-f_at	4.07592	4.14975	4.06716	4.12606	4.09337	4.30065	4.34992	4.23005	4.26636	4.24456	4.37524	4.24344	4.17481	4.2696	4.35113	4.36383	4.41621	4.37978	4.33812	4.21247	0.0542773	0.0264748	0.0377705	0.0554747	0.0301258	0.0390352	0.0495822	0.0503311	0.0502525	0.0268808	0.0401292	0.0312127	0.0320876	0.0459929	0.0333096	0.0505454	0.0338727	0.0457702	0.0453817	0.0334871
axo00633-r_at	8.68044	8.5817	8.73632	8.71414	8.59416	8.62697	8.72331	8.61189	8.70694	8.8656	8.81008	9.04046	8.97444	8.9505	9.21163	9.00702	9.2708	9.2213	8.98756	9.11272	0.0292287	0.0258208	0.0270197	0.0362346	0.0253851	0.034502	0.0284056	0.0249727	0.0343176	0.0231923	0.0416373	0.0458024	0.0403897	0.0445273	0.0221366	0.0308053	0.0350752	0.0262222	0.0184696	0.0240872
axo00635-r_at	6.06879	5.71871	5.87644	6.03949	5.97199	6.09527	6.13224	6.07555	6.28556	6.46641	6.859	7.08316	6.8721	6.72701	6.89679	7.19245	7.41492	7.1299	6.86466	6.73868	0.0837448	0.083495	0.104837	0.0804629	0.0741993	0.141441	0.139417	0.110482	0.0858654	0.101166	0.0653386	0.0774869	0.0846837	0.0980776	0.0510966	0.0525948	0.0372304	0.038212	0.0398717	0.0513982
axo00636-f_at	4.49853	4.46393	4.48871	4.87363	4.91168	5.13251	4.93876	4.79194	4.97645	4.77281	4.94227	4.91331	4.77119	4.74399	4.68931	4.79025	4.73903	4.71841	4.59978	4.58979	0.0947518	0.0342759	0.037152	0.0806129	0.0756269	0.0998215	0.099323	0.0772035	0.113602	0.069938	0.0438942	0.0525477	0.0491927	0.0393798	0.0322854	0.0554964	0.0758657	0.0703745	0.0383137	0.0468814
axo00637-f_at	8.88102	8.74616	8.43633	8.40187	8.30049	7.95893	8.23908	8.30862	8.24247	8.45587	8.38434	8.50293	8.1416	8.41853	8.49644	8.32933	8.42292	8.46023	8.5254	8.51933	0.0268049	0.0294539	0.0243675	0.0475904	0.0412081	0.0420937	0.0403072	0.0535168	0.0349363	0.0285566	0.0459078	0.0277755	0.0470751	0.0561601	0.0278103	0.0352049	0.0380792	0.0497464	0.029858	0.0226204
axo00638-r_at	6.3161	6.52359	6.4102	6.15318	6.12863	6.26664	6.33739	5.8118	5.57959	5.952	5.72715	5.76944	5.99481	6.08514	5.97423	6.12246	6.16913	6.34869	6.32125	6.5229	0.0896674	0.0551774	0.103127	0.0839666	0.083454	0.0534826	0.0556058	0.0562568	0.0563224	0.0798583	0.0568476	0.0732764	0.0927571	0.0718182	0.0252573	0.0854257	0.0527321	0.0796383	0.0412527	0.0885126
axo00639-f_at	4.30349	4.46891	4.64432	4.58988	4.63272	4.62694	4.53347	4.52224	4.52196	4.5043	4.52243	4.56393	4.43871	4.33086	4.36437	4.30187	4.45993	4.33801	4.32978	4.4765	0.0364172	0.0406873	0.0461061	0.0412332	0.0453231	0.0449079	0.0412171	0.0388904	0.0443874	0.0351447	0.0385691	0.0547186	0.0367543	0.0360971	0.0450737	0.0523485	0.0464088	0.0307704	0.0501497	0.0538754
axo00640-f_at	4.69163	5.05485	5.33285	5.49068	5.74279	6.16509	5.70469	5.69992	6.24437	6.57315	6.75269	6.49099	6.4866	6.66846	6.65493	7.80666	7.49788	7.35578	6.87476	6.46507	0.0445444	0.0565103	0.104709	0.0833303	0.094613	0.140738	0.187398	0.153666	0.160893	0.144361	0.13572	0.169773	0.141546	0.129453	0.0986918	0.10975	0.109353	0.0593524	0.0930049	0.127739
axo00641-r_at	8.65621	8.48013	8.26227	7.93289	7.92465	7.48954	7.64527	7.558	7.33418	7.48455	7.10507	7.12961	7.19534	7.19348	7.0343	7.1606	7.24894	7.21283	7.32955	7.55337	0.0579219	0.0607537	0.0637445	0.0398015	0.0732388	0.0514964	0.0608316	0.0560968	0.0512243	0.0420126	0.0774486	0.0476777	0.0353911	0.0364468	0.0393949	0.0571747	0.0488434	0.053332	0.0414757	0.0545377
axo00644-f_at	3.60753	3.56929	3.54874	3.59898	3.61293	3.60427	3.58492	3.56369	3.6058	3.68954	3.64298	3.65318	3.63484	3.70035	3.60583	3.61819	3.59171	3.56953	3.62353	3.6795	0.0480449	0.041971	0.0411538	0.0369764	0.0444714	0.0337154	0.0285299	0.0210549	0.0359814	0.042398	0.0469834	0.0196069	0.0209062	0.0300491	0.033784	0.0310751	0.0456733	0.0300662	0.0189582	0.0502498
axo00645-f_at	14.5808	14.5796	14.5989	14.5935	14.5788	14.5175	14.5285	14.5146	14.5105	14.4807	14.4621	14.4423	14.4691	14.463	14.4677	14.4886	14.5235	14.5016	14.4857	14.5142	0.0036029	0.00317934	0.00419159	0.00253188	0.00368026	0.00314388	0.00350931	0.00399448	0.00385997	0.0035384	0.00370298	0.00322579	0.00292268	0.0017621	0.00216079	0.00218559	0.0022557	0.00151135	0.00140359	0.00251978
axo00646-f_at	4.39477	4.41788	4.28744	4.43243	4.41617	4.36542	4.33778	4.47076	4.4011	4.44962	4.48673	4.54365	4.41451	4.50301	4.44793	4.55263	4.4311	4.36576	4.37628	4.49911	0.0226777	0.0435741	0.0323005	0.0292553	0.035772	0.0197468	0.0368886	0.03409	0.0482801	0.0728495	0.033005	0.0283112	0.0310095	0.0455946	0.0319882	0.0275615	0.0337185	0.0308931	0.0355544	0.0398141
axo00647-f_at	8.82503	8.61814	8.65424	8.79843	8.66403	8.59308	8.59173	8.78297	8.71246	8.7556	8.62825	8.69025	8.82869	8.54467	8.56744	8.58905	8.65348	8.62559	8.54225	8.69437	0.0214064	0.026504	0.0249101	0.0107628	0.0304501	0.0449718	0.0391014	0.0126837	0.0292465	0.0403268	0.0719569	0.0312588	0.0325723	0.046517	0.039725	0.0394869	0.0410357	0.0404365	0.0366098	0.0438255
axo00649-f_at	7.07223	7.19049	7.05891	6.72726	6.62468	6.77003	7.14683	7.30725	7.41468	7.32297	7.47986	7.48161	7.71842	7.69502	7.66384	7.83565	7.78513	7.57675	7.67032	7.72552	0.041676	0.0341004	0.0446258	0.0387234	0.0276962	0.0415546	0.0473652	0.0376176	0.043251	0.0346363	0.0213905	0.0262444	0.0491138	0.0282962	0.0280573	0.0341578	0.0301185	0.0209967	0.0211023	0.0226664
axo00651-r_at	4.37181	4.36112	4.4752	4.3295	4.33099	4.22558	4.31479	4.26464	4.20798	4.19082	4.32051	4.23687	4.22145	4.29554	4.39934	4.24324	4.43326	4.29549	4.36826	4.27142	0.0620263	0.0382743	0.0475818	0.0386794	0.0302736	0.0356561	0.0290215	0.0341139	0.0372356	0.0212109	0.0357701	0.0320393	0.0301973	0.0343443	0.0322405	0.0490841	0.0238872	0.0280723	0.0441287	0.0588597
axo00652-f_at	5.59385	5.68716	5.37287	5.27672	5.30624	5.351	5.15192	5.08143	5.03608	5.24482	5.09526	5.10409	5.04061	5.13581	5.14553	5.0633	5.05435	5.22542	5.06058	5.24795	0.0438542	0.0554462	0.0560973	0.0511595	0.03381	0.0293868	0.0250278	0.0368712	0.0198707	0.035455	0.0289257	0.0339005	0.0315185	0.0347471	0.0291626	0.0434897	0.0385267	0.0256349	0.0412209	0.0425209
axo00653-f_at	4.0745	4.00053	4.11918	3.98007	4.14588	3.97359	3.85501	3.79246	3.88486	3.7673	3.63524	3.67351	3.62304	3.76185	3.72698	3.7187	3.73714	3.60504	3.7555	3.80623	0.0795689	0.0343306	0.0679233	0.0517668	0.0407733	0.0502151	0.032564	0.0382893	0.0653477	0.0564219	0.0367654	0.0455276	0.036723	0.0312717	0.0438039	0.0286219	0.0391007	0.0314187	0.0628983	0.0658029
axo00655-r_at	5.63819	5.2379	5.28416	5.1302	5.18375	5.1421	5.00349	4.91394	4.89522	4.82164	4.62335	4.69509	4.67847	4.78255	4.80857	4.73904	4.77756	4.63132	4.71939	4.841	0.105135	0.102118	0.0791499	0.0485674	0.0627815	0.0457608	0.0489722	0.0565132	0.0346235	0.0349676	0.0382233	0.0621822	0.0345373	0.0585492	0.0275979	0.0442558	0.0698435	0.0505485	0.0359596	0.0685936
axo00656-f_at	4.03231	4.04943	4.04632	4.09153	4.0741	4.07262	4.04566	4.00542	4.08478	4.07448	4.09626	4.13566	4.09552	4.14071	4.17054	4.16584	4.0907	4.10643	4.14658	4.07301	0.0208185	0.0357196	0.0308767	0.033826	0.0370205	0.0202527	0.0291479	0.0511436	0.0261299	0.0478308	0.033869	0.0437321	0.0292367	0.0351775	0.0296109	0.0301093	0.027114	0.0238842	0.0439257	0.0288264
axo00657-r_at	4.74782	4.70652	4.7125	4.82381	4.81256	4.7984	4.82171	4.71028	4.79306	4.7672	4.81263	4.82102	4.83541	4.74025	4.77455	4.81187	4.67588	4.74876	4.81867	4.83448	0.0384556	0.0329977	0.0341238	0.0438775	0.0292991	0.0202018	0.0433059	0.029024	0.0441492	0.0407203	0.0304492	0.0359883	0.0517199	0.050389	0.0350744	0.0300776	0.0246386	0.0285269	0.0320399	0.0291613
axo00658-f_at	3.95064	4.04132	4.12557	4.26602	4.26351	4.31295	4.29703	4.31147	4.36002	4.34914	4.2769	4.26062	4.22595	4.09266	4.17935	4.17814	4.16903	4.20728	4.08487	4.10707	0.0265563	0.0229881	0.0454024	0.0429149	0.0400008	0.0356215	0.0359969	0.0295221	0.0408651	0.0604641	0.039886	0.0353048	0.0383338	0.0237339	0.0467952	0.039849	0.0257169	0.0184091	0.0388809	0.0531892
axo00659-r_at	3.33489	3.31441	3.22547	3.22502	3.18986	3.24175	3.20429	3.2515	3.20677	3.21075	3.32345	3.29334	3.31824	3.3057	3.3271	3.35365	3.43567	3.4758	3.37524	3.39255	0.0585213	0.0251383	0.0426721	0.0389063	0.0402411	0.0307672	0.0140996	0.0298717	0.0466495	0.0346352	0.025846	0.0517312	0.0285875	0.0388066	0.0344338	0.0282763	0.0527193	0.0229228	0.0364524	0.0332695
axo00660-f_at	5.49435	5.48168	5.72456	5.7068	5.77267	6.0593	6.00734	6.11875	5.92014	5.91172	5.87484	6.02934	5.87632	5.9025	6.04049	6.03126	6.11392	6.23277	5.99828	5.92785	0.0606103	0.0512582	0.0231233	0.0375255	0.0378903	0.0399692	0.0543949	0.0556463	0.0356007	0.0245344	0.0299257	0.0238602	0.0245549	0.0345217	0.029984	0.0348091	0.0450673	0.0321631	0.0312059	0.0243118
axo00661-f_at	5.02378	5.10271	4.94056	5.10262	4.82699	4.87121	4.83652	4.77718	4.87188	4.88794	5.03392	4.92084	4.981	4.87225	4.94619	5.08392	4.99455	5.03304	4.9668	4.93403	0.0760124	0.0821116	0.0628733	0.0842881	0.052194	0.0451351	0.0321711	0.0401455	0.0341997	0.0433858	0.0447692	0.040784	0.0362901	0.0410437	0.0307882	0.0395421	0.0385327	0.0486482	0.0293849	0.040674
axo00662-r_at	4.13753	4.12459	4.10826	4.02012	4.04768	4.20156	4.11592	4.24579	4.22355	4.11436	4.2326	4.35928	4.20883	4.35004	4.40933	4.17872	4.20049	4.14211	4.20883	4.35653	0.0549886	0.0409607	0.0372814	0.0518688	0.0350178	0.0473058	0.0476116	0.0567247	0.0401062	0.0435428	0.0372708	0.0480662	0.0312767	0.050597	0.0557429	0.0448907	0.0582825	0.0491812	0.0467478	0.0814125
axo00663-r_at	9.82106	9.76689	9.81949	9.70235	9.58354	9.61214	9.80657	9.76851	9.69193	9.6256	9.6701	9.72488	9.77863	9.82898	9.96361	9.92886	10.1077	9.86647	9.69724	9.84539	0.013695	0.0102629	0.0165499	0.0085517	0.0196325	0.0124852	0.0110998	0.00868834	0.0115713	0.0137337	0.0175275	0.0164417	0.0130556	0.011315	0.0190633	0.0171075	0.0160126	0.0300824	0.0104597	0.012941
axo00664-r_at	7.21408	7.15979	7.01987	7.23478	6.9195	6.90647	6.99032	6.87619	7.14505	7.08173	7.0846	6.86892	7.11702	7.10299	7.24275	7.6029	7.70175	7.37844	7.19641	7.12684	0.0441257	0.0441481	0.0468594	0.0247799	0.0214967	0.0313037	0.0319622	0.0284757	0.0210009	0.0197559	0.033627	0.0482097	0.0268001	0.0417624	0.0341183	0.0310488	0.0377417	0.0453229	0.0315337	0.0526595
axo00665-f_at	7.77991	7.80655	7.44133	7.8326	7.68366	8.01632	7.85745	7.86252	7.99889	7.93716	8.35975	8.21466	8.14504	7.97581	7.78804	8.39629	8.40212	7.92009	7.81189	7.57616	0.0583012	0.0805214	0.0786011	0.0261525	0.0270477	0.06101	0.0712129	0.059777	0.043052	0.0466544	0.0195186	0.0288054	0.0273037	0.0255724	0.0325361	0.0291241	0.0456194	0.0611892	0.0428298	0.0701674
axo00666-f_at	5.73293	5.83153	5.72732	5.7734	5.71428	5.63649	5.58995	5.61538	5.56616	5.72256	5.91775	5.97647	5.81784	5.9158	5.9286	5.90921	5.85009	6.06933	5.92993	6.06579	0.0314127	0.022039	0.0493028	0.0320591	0.0314347	0.0475905	0.030192	0.0508424	0.0542783	0.0504976	0.0417106	0.0401483	0.0397489	0.0449421	0.0279994	0.0325392	0.0276327	0.0497535	0.039691	0.0293242
axo00667-f_at	4.34966	4.26144	4.27141	4.28094	4.27432	4.24908	4.15742	4.20167	4.18397	4.172	4.26585	4.17982	4.1987	4.21464	4.21399	4.20729	4.22026	4.169	4.26265	4.19668	0.048272	0.0373335	0.0640776	0.029763	0.0364778	0.0291569	0.0410868	0.026378	0.0236535	0.0385765	0.0341335	0.0368446	0.0345699	0.0419842	0.0235283	0.0718636	0.0318544	0.0312004	0.0472708	0.0331957
axo00668-f_at	9.72661	9.72678	9.85049	10.0483	9.98724	10.1969	10.2305	10.1659	9.99403	9.99602	9.93894	10.048	10.0634	10.0189	10.099	10.0975	10.1543	10.2846	10.1247	10.0352	0.0122148	0.0201756	0.0163253	0.0138435	0.0175608	0.0144183	0.0125987	0.0113589	0.0110359	0.00701849	0.0131706	0.0145193	0.00740228	0.0114278	0.0118575	0.00720074	0.0113494	0.00562697	0.0114086	0.00831293
axo00670-f_at	6.48039	6.80989	6.85296	6.79448	7.10446	6.54476	6.39906	6.2403	6.40344	6.44951	6.88259	6.57508	6.3766	6.78859	6.60084	6.3564	6.52653	6.32627	6.45522	6.18783	0.0490707	0.0698176	0.0541962	0.062542	0.0671664	0.0568517	0.0831999	0.0638838	0.0763788	0.0610901	0.0996182	0.077684	0.129247	0.0762818	0.0668421	0.0783989	0.109071	0.0776797	0.0699166	0.0864601
axo00673-r_at	11.0383	11.4741	11.6752	11.7525	11.8616	11.7683	11.7153	11.6859	11.6628	11.753	11.6332	11.6611	11.6225	11.5857	11.4993	11.5157	11.3827	11.6499	11.7331	11.618	0.0177516	0.020447	0.0152887	0.0128469	0.00825751	0.0169204	0.0131049	0.00479824	0.00911075	0.0111554	0.0106545	0.0126294	0.0160681	0.00732026	0.0137866	0.0294684	0.0197267	0.0143115	0.0146672	0.0157513
axo00674-f_at	5.14525	5.13817	5.22325	5.25888	5.16738	5.19622	5.12043	5.1559	5.23061	5.19712	5.305	5.3084	5.21415	5.12114	5.20007	5.2266	5.16784	5.18065	5.21922	5.3013	0.0385029	0.0445664	0.0429274	0.0367994	0.0385812	0.034985	0.0401281	0.0274194	0.0429344	0.0403832	0.0289722	0.0222921	0.02811	0.0275112	0.0193033	0.0481522	0.0283636	0.0373362	0.0356834	0.0306493
axo00675-f_at	9.57064	9.78966	9.99958	9.94169	9.92824	9.7462	9.66067	9.73911	9.81333	9.82974	9.87093	9.8265	9.8403	9.92033	9.97741	9.83675	9.96928	9.80738	9.77873	9.82237	0.015791	0.0140544	0.0096777	0.0189299	0.017278	0.00766958	0.01154	0.0102025	0.0115852	0.0167038	0.013748	0.0129873	0.014947	0.0142924	0.0149572	0.0112988	0.0209463	0.0127956	0.0105864	0.0105588
axo00677-r_at	10.2965	10.0546	9.88952	9.70727	9.8697	10.487	10.9253	11.2425	11.0907	10.8912	10.9269	11.1361	11.3556	11.3904	11.5165	11.7066	11.6458	11.7912	11.8065	11.4923	0.037826	0.0460419	0.0561336	0.0517354	0.0281705	0.0203955	0.0220333	0.00976911	0.0250416	0.0272605	0.0342138	0.0258601	0.0206287	0.017384	0.0170689	0.014873	0.0151358	0.0112631	0.0123186	0.0127091
axo00678-f_at	3.43678	3.49915	3.45162	3.48688	3.49889	3.51387	3.46427	3.56154	3.53522	3.48342	3.59513	3.60944	3.57555	3.6107	3.56288	3.66733	3.54938	3.6033	3.59087	3.56797	0.0318993	0.0400256	0.0300878	0.0312089	0.045255	0.055963	0.0317729	0.0361766	0.031044	0.0269709	0.032804	0.0346916	0.031607	0.0473769	0.0365787	0.0494013	0.0426762	0.0473472	0.0294249	0.0309087
axo00679-f_at	4.42021	5.14556	4.96206	4.60485	4.54794	4.6047	4.38605	4.53652	4.46662	4.40612	4.54999	4.43605	4.58137	4.26241	4.38591	4.35157	4.40288	4.45936	4.41148	4.41603	0.0473977	0.0516397	0.0551871	0.0358429	0.0456491	0.0372996	0.0303524	0.0318287	0.0261815	0.0316298	0.0336715	0.0537572	0.0502258	0.0282146	0.0429323	0.0375178	0.0503224	0.0498369	0.0402912	0.0441415
axo00680-f_at	3.6607	3.61428	3.58775	3.61482	3.5357	3.69476	3.69613	3.64013	3.67025	3.65114	3.6204	3.64075	3.63377	3.76159	3.7248	3.62371	3.62093	3.60782	3.62616	3.6815	0.0440363	0.0562112	0.0350717	0.0463538	0.0462115	0.0590046	0.0417367	0.0661632	0.032545	0.0319199	0.0464167	0.0365039	0.0327086	0.0464236	0.0445173	0.0475676	0.0603495	0.0435402	0.0399326	0.0406064
axo00681-f_at	12.2678	12.1108	12.0487	12.068	11.9818	11.7336	11.7379	11.6508	11.6154	11.4967	11.5333	11.4745	11.5105	11.585	11.5898	11.7109	11.7437	11.6359	11.7484	11.8129	0.0212777	0.0202484	0.0187627	0.018494	0.0209594	0.00824555	0.00951097	0.012299	0.0121603	0.0113554	0.0100561	0.0109265	0.0137276	0.0192121	0.00779785	0.0149513	0.0109129	0.00835225	0.0105134	0.0117507
axo00682-r_at	5.6371	5.80874	6.72174	6.23644	6.7533	6.87627	6.76961	6.3973	6.15727	5.8202	5.35928	5.08606	5.09765	4.75682	4.88767	4.64715	4.92476	4.76002	4.839	5.14669	0.0879083	0.133262	0.12999	0.0891348	0.0601	0.109107	0.0741952	0.107036	0.0999084	0.111374	0.0724705	0.100281	0.107531	0.0765813	0.0854258	0.108843	0.102327	0.0648186	0.0844294	0.0721674
axo00683-f_at	3.47955	3.53196	3.50038	3.45062	3.44421	3.39632	3.36235	3.38813	3.37299	3.38055	3.42356	3.48031	3.45844	3.35673	3.43099	3.454	3.47474	3.55436	3.47354	3.43004	0.0295557	0.0394603	0.0577745	0.0316244	0.0353585	0.0403006	0.018579	0.0329686	0.0396279	0.0348288	0.0316162	0.0369451	0.0337474	0.0276814	0.0281963	0.0410382	0.0474518	0.0400298	0.0217427	0.037661
axo00684-r_at	6.45947	6.49781	6.27044	6.60558	6.57003	6.6831	6.62566	6.67405	6.82161	6.87913	6.85474	6.93215	6.84342	6.90927	6.91851	6.92968	6.88376	7.10865	6.84048	6.98084	0.0472534	0.0411143	0.0508429	0.0382753	0.0364025	0.0373707	0.0429245	0.0316884	0.0429732	0.0502265	0.0562078	0.0420602	0.0429981	0.0609742	0.0430174	0.0328611	0.0394759	0.032736	0.0336659	0.0254477
axo00686-f_at	4.18825	4.20803	4.01492	3.79317	3.84856	3.87311	3.91906	4.10298	4.00601	4.00861	4.1377	4.08861	4.01289	4.19069	4.22931	4.46628	4.33664	4.25781	4.30842	4.47911	0.0619933	0.0562858	0.0402042	0.0327384	0.0474646	0.0713186	0.0701757	0.0507634	0.0509969	0.0369154	0.0762987	0.0513834	0.0595877	0.0544911	0.0625031	0.0613925	0.0581675	0.0612991	0.0873955	0.0711863
axo00687-r_at	5.95406	5.41637	5.32863	5.32686	5.71124	5.76148	5.66198	5.61878	5.84234	5.77443	5.51594	5.97136	6.02282	6.14852	6.45337	6.03622	5.97802	5.99915	6.11505	6.20734	0.0807252	0.0651134	0.0444424	0.0629673	0.0399824	0.069759	0.0623978	0.0597371	0.0750034	0.0697094	0.0779595	0.0516998	0.101072	0.110554	0.0701775	0.100025	0.0942932	0.0854139	0.0747769	0.0742038
axo00696-f_at	7.06413	6.93111	6.93337	6.72673	6.88513	6.85274	7.02707	7.20001	7.21473	7.40002	7.2808	7.38395	7.47764	7.52978	7.77629	7.64753	7.72384	7.53816	7.58918	7.63359	0.0237991	0.0427019	0.0337793	0.0545032	0.0367957	0.0324714	0.0344146	0.0338329	0.0380405	0.0408118	0.0252025	0.0234563	0.0355387	0.0313633	0.0260312	0.0309243	0.0367401	0.0303793	0.0420374	0.0315906
axo00697-f_at	4.0154	4.0153	3.96972	3.84242	3.80281	4.06551	4.06346	4.02426	3.9457	4.00831	4.03181	4.18691	4.18761	4.1247	4.09889	4.09405	4.09877	4.13936	4.08425	4.03163	0.0567886	0.109158	0.0509483	0.0401699	0.0653317	0.0467665	0.0266197	0.0747345	0.0393319	0.0732201	0.0682429	0.0609222	0.0752526	0.0366617	0.0709552	0.0554336	0.0296162	0.0554446	0.0330822	0.077186
axo00698-f_at	8.179	8.07284	8.09924	8.11149	8.24258	8.21528	8.35755	8.47481	8.21804	8.2165	8.08925	8.30425	8.2928	8.42097	8.65491	8.45175	8.65036	8.63006	8.599	8.56296	0.0317638	0.0134569	0.0280503	0.0164787	0.0390134	0.0295857	0.0327471	0.0290395	0.0444842	0.0462221	0.0244697	0.0460254	0.0344767	0.0275232	0.0258695	0.0415977	0.0511113	0.0273301	0.0145978	0.0125001
axo00699-r_at	9.60631	9.27326	8.86171	8.95673	9.50868	10.5685	11.0432	11.0128	10.7557	10.9577	10.5589	11.0284	11.0285	11.1628	11.3339	11.2836	11.4852	11.5512	11.2727	10.8956	0.0860883	0.0896414	0.0784727	0.109853	0.0560971	0.0473553	0.0245162	0.0203325	0.0404481	0.0251177	0.0396329	0.0274921	0.03342	0.0249695	0.0347993	0.0261835	0.0182743	0.0242749	0.022058	0.00891369
axo00700-r_at	8.99289	8.24802	8.02058	8.13437	8.88727	9.87515	10.2516	10.2465	9.86565	10.1063	9.70006	10.2534	10.2513	10.379	10.5843	10.5232	10.5503	10.6833	10.5223	10.3394	0.0631536	0.0760636	0.0760229	0.113252	0.0460171	0.0559844	0.0258993	0.0223823	0.0464804	0.0232055	0.0460224	0.0266015	0.0367586	0.0203625	0.0399738	0.0304054	0.0299409	0.0210111	0.0177691	0.0284579
axo00701-r_at	7.38448	6.96786	6.49964	6.67248	7.02131	8.57494	9.07272	9.07	8.69761	8.8902	8.6742	9.26246	9.19776	9.37476	9.61497	9.34314	9.43386	9.79617	9.4361	9.17297	0.120139	0.146892	0.105601	0.147222	0.115055	0.0578228	0.0366963	0.0397182	0.0511367	0.0298821	0.0555844	0.039897	0.0342649	0.0249016	0.035787	0.0339084	0.0221974	0.0235123	0.035822	0.0311912
axo00702-f_at	4.64669	4.70877	4.64622	4.73471	4.73723	4.74762	4.83636	4.73063	4.80292	4.78632	4.81265	4.79924	4.81242	4.84186	4.93549	4.9037	4.70311	4.98715	4.75066	4.86461	0.0320016	0.0277398	0.021749	0.0370521	0.0390099	0.0304592	0.0421988	0.0410414	0.0418846	0.0431111	0.0339259	0.0280588	0.0435659	0.0470271	0.0265021	0.0498347	0.0598828	0.0409767	0.0485884	0.056544
axo00703-r_at	8.7172	8.48845	8.42343	8.76727	8.92931	9.06149	9.1353	9.24147	9.1517	9.31768	9.18704	9.38714	9.35721	9.41344	9.57557	9.46401	9.47662	9.7509	9.70284	9.55901	0.0151014	0.0246952	0.0299194	0.0168472	0.0155181	0.0205233	0.0141948	0.0184205	0.0203651	0.0131724	0.0247013	0.0153661	0.0155702	0.00636525	0.00802232	0.0146112	0.0222198	0.0207645	0.0167035	0.0281835
axo00705-f_at	3.86685	3.81792	3.85513	3.78873	3.84889	3.94113	3.8932	3.83743	3.74495	3.83013	3.8061	3.73476	3.77821	3.82783	3.76063	3.76073	3.8495	3.6878	3.80309	3.66781	0.0600061	0.0407441	0.036994	0.0332708	0.0399442	0.0507357	0.0492172	0.0340245	0.0332049	0.0462523	0.046681	0.0371327	0.0333428	0.0462153	0.0290072	0.0357514	0.042476	0.0400861	0.0429343	0.0287365
axo00706-f_at	4.34891	4.39777	4.53612	4.56063	4.46978	4.37947	4.45753	4.43325	4.4731	4.52058	4.51665	4.42466	4.52504	4.49892	4.5378	4.47119	4.38774	4.46869	4.35318	4.47733	0.0504396	0.0476057	0.0494258	0.0436811	0.0362817	0.0325656	0.0424577	0.0375133	0.023649	0.0541527	0.0448902	0.0567131	0.0557723	0.0421276	0.0282587	0.0401946	0.0362675	0.0380451	0.0516249	0.0299571
axo00707-f_at	9.2867	9.33086	9.19991	9.29046	8.89491	9.39924	9.47909	9.49772	9.48477	9.57771	10.1012	10.2948	10.0761	10.0785	10.2505	10.1304	10.1416	10.0966	10.1869	10.1225	0.0751195	0.0751102	0.0636337	0.0682189	0.0825046	0.0462454	0.0402815	0.0735969	0.056112	0.0533405	0.0404355	0.0421363	0.0334121	0.0320535	0.0222721	0.0496428	0.0516423	0.0594639	0.0424267	0.058193
axo00708-f_at	8.66995	8.42295	8.97706	9.06735	9.13149	8.87144	8.77933	8.91703	8.87982	8.94747	8.71436	8.92349	8.83588	8.79308	8.97099	8.83435	8.97516	9.01941	8.86018	8.82774	0.0320816	0.0217379	0.0149065	0.0192356	0.015724	0.0144854	0.0115044	0.0205271	0.015113	0.0292298	0.0180533	0.013568	0.0127444	0.0082623	0.0090729	0.0154095	0.016228	0.0273255	0.0119496	0.0129648
axo00711-f_at	4.05441	4.2004	4.28975	4.31317	4.30393	4.41619	4.38637	4.3123	4.36951	4.29554	4.50772	4.36007	4.26691	4.32901	4.28965	4.37999	4.38678	4.35302	4.29145	4.28452	0.0324031	0.0405593	0.0447021	0.0302913	0.0358113	0.0498955	0.0581251	0.0420017	0.0365079	0.0411358	0.0400257	0.0364949	0.0317682	0.031547	0.0402576	0.0283774	0.0494911	0.03256	0.0335867	0.0406028
axo00712-r_at	4.34738	4.39884	4.22775	4.49179	4.44117	4.48229	4.3374	4.42678	4.34975	4.35895	4.41064	4.47427	4.40536	4.42807	4.47722	4.42479	4.32967	4.47163	4.34575	4.49336	0.0373811	0.025277	0.0518607	0.0383946	0.029163	0.0336398	0.0419165	0.0371542	0.0358478	0.0542743	0.0444729	0.0356975	0.0285148	0.0305131	0.0265749	0.0367238	0.0415656	0.0389683	0.0348653	0.0399427
axo00714-f_at	3.92109	4.02661	4.0108	4.0713	4.03777	4.08656	4.10751	4.08069	4.14701	4.03937	4.02777	4.10605	4.02908	4.13925	4.13968	4.09986	4.00903	4.08591	4.06082	4.01893	0.0471964	0.0420923	0.0332938	0.0508199	0.0230025	0.0496712	0.0262919	0.0403241	0.0305768	0.022416	0.0406502	0.0229905	0.0408533	0.0333687	0.0290083	0.0243719	0.0386398	0.036023	0.026884	0.0551646
axo00715-r_at	8.3374	8.33348	8.20406	8.23314	8.46734	8.56224	8.61446	8.61502	8.66467	8.54645	8.5544	8.49039	8.65124	8.67406	8.792	8.83258	8.8233	8.66205	8.57701	8.60787	0.0178072	0.0211532	0.0252407	0.0197973	0.0247019	0.0166434	0.015489	0.0130721	0.0181702	0.0141906	0.00985639	0.0274821	0.0083554	0.0146122	0.0116847	0.0169292	0.0214734	0.019831	0.0162438	0.0203289
axo00716-r_at	8.03171	8.28409	7.2828	6.56058	6.53898	6.31448	6.3048	6.31918	6.16214	5.96603	5.43268	5.26974	5.23122	5.06747	4.97509	4.94876	4.93068	4.90237	4.99671	5.02611	0.0542332	0.0559898	0.0569224	0.0370041	0.0624952	0.0524514	0.059928	0.0744222	0.0788006	0.0783226	0.0784207	0.0918129	0.0779591	0.0530239	0.0341451	0.0481277	0.0405821	0.0250732	0.0392611	0.0303239
axo00717-f_at	4.05058	3.96051	3.97123	4.00428	3.91422	3.98124	3.92465	3.82969	3.90474	3.92042	3.8554	3.92083	3.91909	3.88984	3.81584	3.83809	3.79168	3.85277	3.91145	3.96821	0.037858	0.0474393	0.0533659	0.0401922	0.0486644	0.0439252	0.0331855	0.0348574	0.0332747	0.0353521	0.0470056	0.0234659	0.0350738	0.0319302	0.0279786	0.0355385	0.0437572	0.022306	0.0355832	0.0642077
axo00719-f_at	3.70863	3.66082	3.71275	3.75181	3.80819	3.7121	3.69543	3.68476	3.59279	3.66178	3.61882	3.63784	3.788	3.72288	3.69177	3.7414	3.7729	3.8015	3.75006	3.7483	0.0367466	0.0269848	0.0519534	0.0234162	0.0338037	0.0361392	0.0318415	0.0348667	0.0317693	0.0412657	0.0483906	0.0308297	0.0287674	0.0333	0.0341292	0.049932	0.0388483	0.0467221	0.0525652	0.0289479
axo00720-f_at	3.88767	3.93324	3.82245	3.95541	3.89913	3.87603	3.99114	3.94683	3.91791	3.90101	4.04024	4.03737	3.85281	3.92541	4.02012	4.04431	3.94561	3.94951	3.99351	3.99145	0.0449826	0.0339256	0.0470184	0.0502792	0.0441871	0.0512895	0.0298081	0.0427502	0.0496198	0.051041	0.0534494	0.0313532	0.0377692	0.0341474	0.0220621	0.0393008	0.0420203	0.0401116	0.0306618	0.0399098
axo00721-r_at	9.63627	9.55088	9.4909	9.60563	9.66529	9.68462	9.66068	9.78745	9.85986	9.94818	9.90821	9.9051	9.91606	9.83325	9.83001	9.78689	9.8106	9.88576	9.69909	9.72228	0.0125152	0.00991959	0.0196741	0.00791015	0.0102576	0.00667458	0.0104403	0.0100511	0.0132377	0.0063559	0.00963588	0.00935699	0.00849981	0.00737919	0.00586188	0.0111184	0.0143383	0.00997233	0.00777178	0.0102211
axo00722-f_at	8.95851	8.67242	8.69874	8.41301	8.3657	8.06329	7.89174	8.01602	8.10711	8.20123	8.07489	8.20844	8.39766	8.49533	8.62374	8.51157	8.59199	8.58379	8.64731	8.7742	0.0212877	0.0209698	0.0198671	0.0145881	0.0236441	0.0274923	0.0251332	0.0337947	0.0373351	0.0335116	0.0365687	0.018871	0.02593	0.0323044	0.0277018	0.0430624	0.0167653	0.0276182	0.0255576	0.0333833
axo00723-f_at	3.77364	3.896	3.83793	3.77851	3.81224	3.83005	3.77771	3.72527	3.7028	3.83158	3.83461	3.80847	3.7736	3.77373	3.86496	3.83587	3.79429	3.83352	3.74267	3.83068	0.0541386	0.0279917	0.0267289	0.0507822	0.043923	0.0432271	0.0317471	0.0357591	0.0421959	0.0552912	0.0264405	0.0411319	0.0213692	0.0300466	0.0295289	0.0457847	0.0455022	0.0318995	0.0361293	0.054071
axo00724-f_at	4.32889	4.3375	4.32422	4.34456	4.3436	4.28954	4.37197	4.40341	4.35451	4.30052	4.32873	4.27173	4.33054	4.32132	4.26877	4.17017	4.15667	4.23363	4.29027	4.36463	0.0518714	0.037962	0.0512368	0.0433505	0.0297778	0.0479985	0.0458639	0.0396707	0.0161877	0.0275641	0.0418729	0.035161	0.0293335	0.030927	0.0367078	0.0357149	0.051429	0.0364019	0.0375952	0.0469658
axo00725-f_at	8.58694	8.43875	8.67307	8.83764	8.94605	8.89169	8.84509	8.99671	9.16661	9.45891	9.25125	9.21167	9.08392	8.80302	8.62997	8.67639	8.57719	9.01325	8.86284	8.93526	0.0293954	0.0585215	0.0476048	0.0287792	0.0129878	0.0291919	0.0287815	0.0255109	0.0320274	0.030071	0.0470709	0.0360539	0.0622855	0.0346833	0.0278075	0.0418086	0.0264613	0.0232699	0.0298923	0.043279
axo00726-f_at	8.99286	8.48354	8.86431	8.54821	8.67796	8.30516	8.32028	8.10654	8.15659	7.89376	7.89791	8.05215	7.89982	8.13232	8.0795	8.19101	8.12322	8.07066	8.19657	8.13741	0.0355278	0.0237037	0.0431997	0.025312	0.037936	0.0214934	0.0264466	0.0185648	0.023205	0.0257066	0.0192471	0.0251771	0.029559	0.0165653	0.03617	0.0446971	0.0274672	0.0254116	0.0433478	0.0267342
axo00727-f_at	4.50831	4.55531	4.48279	4.49971	4.61597	4.75702	4.82558	4.99471	4.79006	4.71138	4.79609	4.78954	4.76474	4.76169	4.75654	4.75028	4.80599	4.67047	4.55456	4.57853	0.0541976	0.0684379	0.0609227	0.0374211	0.0842565	0.0764196	0.0297353	0.0541185	0.0540194	0.0882776	0.0822485	0.102814	0.0521264	0.0837066	0.0890805	0.0637661	0.0719369	0.0335851	0.0371503	0.0484372
axo00728-f_at	4.69499	4.7011	4.90191	4.96402	4.9899	5.5495	5.29925	5.04698	4.98982	4.98471	5.04731	5.16961	4.90798	4.89937	4.93198	5.04484	5.13382	5.11907	4.86024	4.96431	0.0510924	0.0556591	0.0553199	0.0633122	0.0500309	0.0567965	0.0796625	0.0555502	0.0556642	0.0418583	0.0181643	0.044249	0.0339121	0.0429964	0.045043	0.083515	0.054926	0.0508309	0.0571424	0.0391683
axo00729-f_at	3.32107	3.42343	3.40231	3.38507	3.43045	3.4541	3.41334	3.37566	3.44173	3.40986	3.49409	3.50544	3.52439	3.41757	3.38062	3.59504	3.45132	3.47196	3.42888	3.5214	0.032749	0.0409402	0.0402926	0.0203003	0.0585396	0.0485614	0.0254394	0.0411556	0.0314615	0.0277913	0.0373315	0.0400737	0.0541208	0.038935	0.0369508	0.0557926	0.0468188	0.0461278	0.0337989	0.0342236
axo00731-f_at	4.95002	4.91285	5.02624	4.9868	5.07559	4.9276	5.00666	5.01204	5.00189	5.12521	5.00249	5.05578	4.92515	5.00305	4.96916	4.9106	4.91146	4.91274	4.95503	4.89997	0.0368704	0.038371	0.0220873	0.0248635	0.057756	0.0331813	0.0406722	0.0241273	0.0252143	0.0525325	0.0322545	0.0290591	0.0352722	0.0525859	0.0259461	0.0533759	0.0267362	0.0337991	0.0350582	0.0248483
axo00732-f_at	7.19214	7.15054	7.08681	7.11039	7.64715	7.96247	8.05276	8.29319	8.02482	7.67818	7.68618	7.71066	7.81816	7.88926	7.91834	7.90986	7.70598	7.83291	7.8817	7.59648	0.0313787	0.0725675	0.0612022	0.0410426	0.0357593	0.025574	0.048612	0.0298405	0.039	0.0475495	0.0548837	0.0383421	0.0436069	0.0502985	0.0265861	0.0403092	0.0447228	0.0306178	0.0255621	0.0612202
axo00733-r_at	9.9869	9.94938	9.99883	10.0393	10.0657	10.0043	10.0247	10.089	10.1642	10.2252	10.2777	10.3058	10.3128	10.3759	10.3426	10.3031	10.2601	10.3	10.3819	10.3748	0.0209039	0.0186442	0.0128587	0.0134123	0.0166783	0.012039	0.0079481	0.0112923	0.0126192	0.0151325	0.0160316	0.0185541	0.0172597	0.0138133	0.00958738	0.0137338	0.012986	0.0104133	0.00837197	0.00764076
axo00735-r_at	4.98493	4.99233	4.99843	5.36146	5.19431	5.69305	5.50192	5.29684	5.51364	5.49544	5.86924	5.65053	5.27831	5.44292	5.13589	5.19413	5.11399	5.18264	5.01232	4.77298	0.100979	0.115793	0.121543	0.07167	0.0629371	0.0958533	0.0918815	0.0728023	0.112047	0.0834919	0.0580048	0.0885141	0.0382313	0.0730397	0.0467404	0.0950594	0.100244	0.0919565	0.078616	0.0610064
axo00736-f_at	7.52429	7.40802	7.29702	7.12458	7.2888	7.39091	7.52513	7.6763	7.77958	7.65064	7.50612	7.61024	7.72139	7.67559	7.73687	7.53811	7.65383	7.66009	7.67535	7.60777	0.0153291	0.0223493	0.0300806	0.0254162	0.0203979	0.0166559	0.0288932	0.0194552	0.017972	0.0196011	0.0228103	0.0222358	0.0159616	0.0236717	0.0222144	0.0174103	0.0257934	0.0111209	0.00957666	0.0154965
axo00737-f_at	4.79005	4.87059	4.83386	4.86459	4.76214	4.68915	4.7231	4.72066	4.69929	4.73262	4.77973	4.71396	4.7449	4.6981	4.7235	4.77681	4.65812	4.81471	4.76344	4.76499	0.0417057	0.0467321	0.0311471	0.0398316	0.0313536	0.0198558	0.0212542	0.0364954	0.0368803	0.0460358	0.0292959	0.0285421	0.0346922	0.030179	0.0264271	0.0343599	0.0304474	0.0251207	0.029321	0.0353766
axo00738-f_at	8.67404	8.39208	8.3372	8.28942	8.25889	8.07701	7.98028	8.24866	8.14245	8.15041	7.96235	8.07001	8.33676	8.36806	8.38756	8.44733	8.52148	8.36394	8.0459	8.15376	0.0326531	0.0368464	0.0252588	0.0197943	0.0404444	0.0272782	0.0603457	0.0346868	0.0445291	0.0295811	0.0440538	0.0377442	0.0252972	0.0274184	0.0448231	0.0265801	0.024151	0.0322665	0.0334556	0.0297507
axo00740-r_at	6.62965	6.36332	5.96484	5.99756	6.24684	6.22974	6.30926	6.5169	6.51972	6.45285	6.61164	6.63858	6.72024	6.86864	6.723	6.80538	6.83312	6.75744	6.6907	6.74425	0.0297831	0.0313692	0.0551111	0.0375743	0.0379019	0.0332212	0.0342351	0.032396	0.027243	0.0408772	0.0354675	0.0288749	0.0168935	0.0372508	0.0300861	0.0305349	0.0271322	0.0186892	0.0456534	0.0165097
axo00741-r_at	9.03759	8.74022	8.73988	8.80771	8.80924	8.67112	8.77827	8.82162	8.76592	8.74172	8.68188	8.67339	8.73624	8.83003	8.82883	9.04014	9.08513	8.954	8.91692	8.83058	0.0182005	0.0101763	0.014661	0.0131686	0.0172256	0.0101302	0.0211584	0.0132003	0.0151386	0.0113272	0.0208838	0.00645327	0.0128034	0.014023	0.0109323	0.0165128	0.0137227	0.0111183	0.00680946	0.0140347
axo00742-r_at	7.18027	7.06065	7.03693	7.13794	7.01456	7.04892	7.13557	7.12968	7.04038	7.08939	7.14207	7.09267	7.11856	7.19093	7.24445	7.39671	7.39257	7.37833	7.37062	7.29694	0.0220331	0.0209918	0.0249448	0.013302	0.0185292	0.0143143	0.0237952	0.0211605	0.0271641	0.0196177	0.0237313	0.0161882	0.0141543	0.0158678	0.018107	0.0176951	0.0128024	0.0128525	0.0131101	0.0289868
axo00743-r_at	7.62736	7.38974	7.32225	7.47022	7.41204	7.2988	7.46123	7.43707	7.40225	7.39112	7.37825	7.39252	7.43661	7.52163	7.55941	7.73212	7.77693	7.80574	7.73884	7.63698	0.0179014	0.020877	0.0288059	0.0100321	0.0248264	0.0123937	0.0248625	0.0278869	0.0133044	0.0259763	0.0334767	0.0210166	0.0251032	0.0162187	0.0187792	0.022508	0.0125877	0.0209876	0.00979009	0.0205338
axo00744-f_at	7.26331	7.09218	7.39131	7.09562	7.06512	6.74679	6.99319	7.12065	7.29042	7.42121	7.31009	7.38609	7.52129	7.73876	7.82392	7.7833	7.86165	7.74238	7.86778	7.80299	0.0365513	0.0393383	0.0527577	0.0456653	0.0370081	0.0502934	0.0470729	0.0464935	0.0452669	0.0209853	0.0324887	0.0253657	0.02702	0.020616	0.0200407	0.0308767	0.0307875	0.0140271	0.0229934	0.024797
axo00745-f_at	6.96339	6.67483	6.55917	6.51675	6.57652	6.51755	6.44381	6.58818	6.65484	6.54924	6.33361	6.29983	6.58251	6.53817	6.56208	6.48959	6.5051	6.42261	6.44369	6.38701	0.0274102	0.0267757	0.0178539	0.0276979	0.0401717	0.0231889	0.0297524	0.0231507	0.0284687	0.0337089	0.0260131	0.0240381	0.031293	0.0366908	0.0361772	0.0408859	0.0313249	0.0238572	0.0259285	0.0420717
axo00746-r_at	7.1757	6.54319	6.8901	7.1912	7.42978	7.45686	7.44335	7.63192	7.62808	7.6315	7.6928	7.67833	7.75981	7.76142	7.78511	7.73105	7.89608	7.88231	7.94355	7.80975	0.00790517	0.0185412	0.0313873	0.0351356	0.0218056	0.0355642	0.0396024	0.011308	0.0127847	0.0179091	0.0209624	0.0111517	0.0179264	0.0171932	0.0143577	0.0223298	0.028366	0.0172643	0.0151469	0.0282013
axo00747-f_at	5.90744	5.73109	5.60085	5.36632	5.40047	5.43619	5.49748	5.60973	5.62298	5.61469	5.47714	5.47354	5.52822	5.65955	5.64533	5.56039	5.60452	5.69369	5.65599	5.75776	0.0448521	0.0365461	0.0515788	0.034642	0.0337819	0.0409615	0.0396214	0.0514659	0.0434719	0.0503772	0.0271187	0.0417312	0.0387615	0.0490927	0.0182186	0.0359355	0.0263019	0.0258861	0.0301907	0.058306
axo00748-f_at	3.65315	3.46351	3.50289	3.56142	3.53449	3.6124	3.43322	3.65836	3.62137	3.61116	3.65568	3.53833	3.4719	3.47696	3.56835	3.64317	3.65187	3.66345	3.49714	3.62111	0.0274201	0.0287685	0.0385488	0.0541607	0.0417123	0.0501826	0.0435369	0.0408396	0.0377362	0.0413415	0.0272138	0.0425375	0.0388559	0.04822	0.0301894	0.0521215	0.0456011	0.0590578	0.0362366	0.0490531
axo00749-f_at	4.51494	4.61294	4.45006	4.41241	4.37146	4.37932	4.58384	4.5523	4.53855	4.5801	4.66035	4.61029	4.63891	4.61918	4.72747	4.77229	4.8269	4.71493	4.66218	4.68628	0.0316907	0.0447015	0.0572045	0.0257172	0.0570239	0.0541019	0.0336377	0.0396776	0.0579033	0.0304953	0.0348005	0.0477051	0.0416862	0.0439205	0.0463893	0.0399037	0.0444698	0.0350683	0.0350848	0.0617961
axo00750-f_at	7.93495	7.96117	7.85633	7.8521	7.99219	8.04649	8.09648	8.05476	7.99668	7.97406	7.95454	8.01266	8.12544	8.16524	8.34204	8.08678	8.30391	8.20594	8.10735	8.1869	0.0280505	0.0243627	0.0329652	0.0380034	0.0163607	0.0146081	0.0228308	0.0242936	0.0158812	0.0246159	0.0169043	0.0135633	0.0160206	0.0282197	0.0184428	0.0210094	0.0175806	0.0156038	0.022465	0.0094209
axo00751-f_at	3.706	3.64381	3.73893	3.72416	3.67569	3.82626	3.86627	3.89317	3.86569	3.75685	3.76285	3.81847	3.82742	3.84423	3.87862	3.83195	3.93063	3.73019	3.74847	3.80865	0.0478028	0.0559483	0.0458448	0.0470722	0.0610632	0.0264886	0.0320761	0.067258	0.0394342	0.0414516	0.0238722	0.0629089	0.0414463	0.0765571	0.0428507	0.0651738	0.0567205	0.0257352	0.0572518	0.0391386
axo00752-f_at	9.02176	9.08862	8.93372	9.02665	8.74244	8.92964	8.96238	8.89763	8.83484	8.72026	8.85909	8.92641	8.7918	8.7388	8.65296	8.67782	8.55778	8.45314	8.62637	8.82871	0.0392091	0.0247451	0.0267293	0.0241683	0.0295656	0.0121915	0.0196054	0.0189429	0.0472613	0.0277132	0.0309925	0.0286622	0.0280838	0.058026	0.0378714	0.029559	0.0291381	0.0495804	0.0271272	0.0352116
axo00753-r_at	5.18736	5.29814	5.06437	5.15285	5.02175	5.32279	5.31572	5.37065	5.26718	5.13183	5.4156	5.45125	5.33747	5.19588	5.18301	5.10518	5.09179	5.14125	5.20583	5.22218	0.0559458	0.0535405	0.0344572	0.0329123	0.0438764	0.0355428	0.039601	0.045106	0.0485143	0.0383114	0.0337548	0.0638194	0.0418474	0.0338361	0.0365261	0.0462005	0.0573352	0.0486035	0.0493977	0.0819606
axo00754-r_at	4.50291	4.39994	4.40972	4.61304	4.63408	4.57054	4.59487	4.65621	4.68977	4.72222	4.63967	4.65142	4.63544	4.83577	4.89836	4.88661	4.96001	4.87273	4.81271	4.90926	0.0427928	0.0491785	0.0519049	0.0307876	0.0469802	0.0354712	0.0419385	0.0410048	0.0403233	0.0620121	0.0437633	0.0247161	0.0410717	0.0513535	0.0298252	0.056894	0.0470524	0.0519149	0.02392	0.0490783
axo00755-f_at	4.20551	4.21409	4.08935	4.10627	4.1478	4.17073	4.11567	4.06425	4.12997	4.14266	4.3475	4.22293	4.18446	4.24597	4.17374	4.26262	4.27978	4.16955	4.36071	4.19702	0.0582548	0.047166	0.0601446	0.0474624	0.033757	0.0583543	0.0430541	0.0418864	0.0505368	0.0453635	0.0415879	0.0452312	0.0697104	0.0378784	0.0280266	0.0430532	0.031069	0.0344093	0.0219167	0.0509389
axo00756-f_at	4.96768	5.28858	5.27776	5.42254	5.66638	5.62954	5.3249	5.41521	5.68282	5.50825	6.26399	5.74388	5.52313	5.78197	5.33726	4.88221	5.14445	4.98352	5.06621	4.88105	0.0851118	0.119532	0.0710523	0.0910393	0.0946163	0.095495	0.117004	0.1201	0.144298	0.136783	0.152244	0.092139	0.247629	0.152618	0.123986	0.123996	0.167648	0.162293	0.137045	0.161863
axo00758-r_at	4.99024	4.89687	4.94297	5.08511	4.92924	5.04283	5.10335	5.05923	5.19749	5.2795	5.40804	5.37779	5.32598	5.30716	5.30254	5.49683	5.49699	5.45231	5.51514	5.43875	0.0615644	0.046404	0.051756	0.0583714	0.0401194	0.0524042	0.0460477	0.0603917	0.0720952	0.0801654	0.0777353	0.0557742	0.0605708	0.0430162	0.0440681	0.05915	0.06992	0.0633807	0.0702816	0.0579073
axo00759-r_at	7.51845	7.35475	7.50946	7.20382	7.21494	7.16762	7.56228	7.91396	8.23931	8.22758	8.40983	8.29652	8.51387	8.52857	8.69818	8.65616	8.74285	8.60059	8.78201	8.70114	0.0420442	0.0565284	0.0781825	0.0655542	0.0586687	0.0633273	0.0474132	0.0631831	0.0388042	0.033496	0.0188378	0.0270142	0.0309331	0.0186439	0.0255082	0.0372862	0.0193502	0.0159336	0.0231711	0.0287026
axo00760-f_at	7.79693	7.63321	7.74048	7.53943	7.56762	7.83209	7.90892	7.68974	7.77748	7.90397	7.78126	7.87042	8.03615	8.07935	8.01399	7.97306	7.87192	7.689	7.75201	8.07508	0.0446302	0.0307359	0.0400229	0.0460708	0.0290514	0.0398464	0.0251798	0.0417918	0.0305574	0.0264706	0.0150961	0.0391254	0.0324004	0.0301015	0.0237321	0.0286469	0.0292288	0.0348301	0.0230585	0.0166065
axo00761-f_at	8.25414	8.2156	8.00458	8.12273	8.18861	8.11325	8.10492	8.1854	8.26433	8.51382	8.5387	8.58722	8.52368	8.56002	8.60182	8.81072	8.66082	9.04888	8.9946	9.10776	0.0266914	0.0392927	0.0489291	0.0244955	0.0292093	0.0327479	0.0416794	0.0354325	0.024038	0.0357516	0.0431014	0.0494138	0.037832	0.0370411	0.0389254	0.0315317	0.0448333	0.020856	0.0186292	0.0173273
axo00762-f_at	3.67376	3.7058	3.68386	3.79172	3.7241	3.6889	3.62426	3.66972	3.64662	3.75407	3.65005	3.69967	3.72165	3.70443	3.75366	3.7271	3.73026	3.67447	3.68689	3.73159	0.0273808	0.0417772	0.0405436	0.0273721	0.0280563	0.0402105	0.044482	0.0333284	0.0406424	0.0180523	0.05533	0.0314357	0.0323228	0.0434551	0.053934	0.0411256	0.0380243	0.0462901	0.0376427	0.0351219
axo00763-f_at	5.55896	5.80199	5.7119	5.72626	5.70057	5.65183	5.64872	5.56336	5.67681	5.67159	5.67696	5.73897	5.66178	5.62146	5.73892	5.60651	5.59758	5.63148	5.5979	5.71768	0.0215079	0.0254101	0.0390701	0.03623	0.0302638	0.0238372	0.0195699	0.0300289	0.0269336	0.0405309	0.0245822	0.026582	0.025847	0.0131866	0.0290376	0.0364588	0.0208685	0.0208937	0.0428311	0.0270287
axo00764-f_at	10.2487	9.96554	9.8056	9.88111	9.8281	9.94882	10.0334	10.3369	10.2309	10.154	10.2293	10.3461	10.3863	10.4615	10.5256	10.5415	10.3943	10.5466	10.4337	10.2728	0.0154584	0.0145003	0.0340484	0.0209574	0.00783592	0.00870864	0.025844	0.0107854	0.01734	0.014655	0.0167928	0.0133305	0.00941899	0.0074407	0.0148378	0.0123133	0.020674	0.00976962	0.0146187	0.0156043
axo00765-r_at	6.17826	6.12938	5.94883	5.92339	5.78491	5.63454	5.66877	5.5857	5.58258	5.48773	5.53796	5.635	5.58597	5.4567	5.52014	5.55319	5.43113	5.50936	5.48855	5.64577	0.0427012	0.0517197	0.0374393	0.0398203	0.0441127	0.0271252	0.0230724	0.0279375	0.0291502	0.0435367	0.0385261	0.0240476	0.0490094	0.0335092	0.0371251	0.0323242	0.0432666	0.0376972	0.0277661	0.040697
axo00766-r_at	7.93413	9.17691	9.48615	9.2409	9.16821	8.60981	8.20119	7.80724	7.57146	7.54517	7.76467	7.55671	7.48999	7.33331	7.41003	7.65117	7.62656	7.81546	7.71179	7.97481	0.0358734	0.031874	0.0411729	0.0402372	0.0313903	0.0288919	0.0410898	0.0511584	0.035211	0.0426178	0.0408123	0.0469292	0.055785	0.0585699	0.0572282	0.0675128	0.0627242	0.0689981	0.0608993	0.0454744
axo00767-f_at	3.38558	3.31658	3.33112	3.3213	3.3287	3.28766	3.34547	3.26086	3.3253	3.34637	3.33509	3.35342	3.34622	3.30275	3.35157	3.29092	3.25717	3.32753	3.39776	3.43287	0.0335074	0.0481307	0.0356641	0.0408685	0.0334487	0.0450527	0.0378449	0.0426287	0.0528979	0.0550175	0.0499289	0.0412943	0.0478644	0.0333121	0.0289515	0.0241153	0.0412537	0.0456942	0.0530258	0.0315804
axo00768-f_at	3.49435	3.55209	3.45638	3.45474	3.48105	3.37872	3.36795	3.37452	3.35831	3.35427	3.39836	3.37672	3.45031	3.33837	3.44605	3.40836	3.45839	3.35361	3.44107	3.48147	0.0560365	0.0529743	0.0374783	0.0442147	0.0541403	0.0441652	0.0347419	0.0331754	0.027172	0.0549701	0.0466082	0.0508051	0.0419874	0.0313323	0.0633256	0.0499671	0.0767427	0.0564797	0.0247885	0.0522413
axo00770-f_at	10.5438	10.1768	10.1603	10.0656	10.1414	10.7066	10.7276	11.3396	11.7583	11.9357	11.9875	12.0997	12.2453	12.1846	11.9687	11.9844	11.7357	11.6732	11.5234	11.3597	0.0242511	0.0459869	0.0372337	0.0761396	0.0268691	0.0247732	0.0340099	0.0389577	0.0176488	0.0176683	0.0279069	0.0273143	0.0151182	0.0166467	0.0215533	0.0268733	0.0258743	0.0130555	0.0211755	0.0319427
axo00771-r_at	7.3034	7.30072	7.38877	7.21197	7.2503	7.38929	7.47725	7.53065	7.34985	7.33672	7.4937	7.3173	7.17051	7.35058	7.29484	7.48358	7.28207	7.20103	7.40024	7.42162	0.0551978	0.0199556	0.0471161	0.0254294	0.038872	0.0324093	0.0230109	0.0314355	0.0263197	0.0162056	0.0213939	0.03436	0.0315431	0.0415057	0.0234031	0.0208324	0.0123733	0.0379205	0.033911	0.0456588
axo00772-r_at	5.77877	6.78681	6.57697	6.59769	6.50452	6.44185	6.54126	6.60141	6.42945	6.89874	6.39027	6.69064	6.59566	6.72163	7.12519	6.61657	6.87072	7.05192	6.99937	6.85503	0.122148	0.0489454	0.0672426	0.0785114	0.0990131	0.0782955	0.0617622	0.0577201	0.0666756	0.0753578	0.0824443	0.0504239	0.0417058	0.0292027	0.0291168	0.0499411	0.0303898	0.0443974	0.0508937	0.0496583
axo00773-r_at	6.7182	6.51984	6.20939	6.06765	6.01579	5.71283	5.55078	5.60774	5.41433	5.48856	5.16547	5.33015	5.48734	5.34934	5.39088	5.26254	5.49991	5.21673	5.22828	5.28121	0.0650394	0.117492	0.0857415	0.10861	0.0676298	0.0699228	0.0565646	0.0839947	0.0593665	0.0566961	0.0700297	0.0915406	0.0442775	0.0700731	0.0734378	0.118669	0.104044	0.0532974	0.0548748	0.0913822
axo00774-f_at	7.33182	7.80439	7.68248	7.97501	7.37348	7.58518	7.17911	7.31689	7.17111	7.94146	8.60773	8.17337	7.68089	8.23187	8.1417	8.23897	8.18437	8.51413	8.35668	8.86489	0.0630136	0.0865988	0.114036	0.11008	0.131697	0.0766309	0.15734	0.0998371	0.105279	0.0741322	0.0660894	0.0895866	0.117607	0.0884415	0.107344	0.0598039	0.0962013	0.0482981	0.0410179	0.0653554
axo00775-f_at	6.61466	7.00469	7.64643	7.60895	7.58924	7.34373	7.42177	7.64238	8.14308	8.27351	8.10309	8.0028	7.59819	7.36473	7.55264	7.77605	7.97812	7.90473	8.10615	8.14034	0.0398449	0.0313318	0.0349638	0.0284616	0.0364212	0.0444775	0.0447246	0.0737337	0.0409319	0.0578666	0.0387378	0.0638043	0.0475768	0.0750611	0.0598398	0.0438513	0.0493183	0.0444363	0.034883	0.0580615
axo00776-f_at	6.65125	6.38281	6.10789	6.1825	6.46754	6.58729	6.61043	6.81645	6.80811	6.65864	6.55051	6.79288	6.69399	6.74521	6.88607	6.54844	6.86584	6.81625	6.85157	6.87478	0.0383055	0.0628253	0.0421751	0.0514436	0.0459304	0.0464745	0.0444246	0.0502313	0.0248881	0.0445841	0.0402645	0.0325601	0.0316763	0.0170145	0.0193803	0.0532157	0.0521123	0.0280538	0.0390411	0.0292012
axo00777-f_at	3.58617	3.61191	3.67143	3.59525	3.66395	3.54536	3.46382	3.51645	3.53448	3.53557	3.60171	3.63478	3.5131	3.55993	3.48237	3.59974	3.58013	3.60113	3.51734	3.60631	0.0227859	0.0429007	0.0315369	0.0438966	0.0332852	0.0407971	0.0393355	0.0267405	0.0181304	0.0361781	0.0545854	0.0380534	0.0263526	0.03233	0.03969	0.0404328	0.0290773	0.0233232	0.0318123	0.0264411
axo00779-f_at	9.79976	9.95239	10.1759	10.3345	10.3798	10.4458	10.4339	10.385	10.3954	10.4995	10.6054	10.5247	10.4622	10.3606	10.3696	10.4544	10.4143	10.4805	10.4325	10.51	0.0243664	0.0380855	0.0158338	0.0175409	0.0102307	0.013181	0.0138125	0.0217262	0.0170762	0.0162102	0.0166494	0.0165366	0.0154041	0.0205112	0.0173398	0.0079993	0.0138372	0.00882526	0.00997353	0.0160618
axo00781-f_at	3.41731	3.45825	3.45353	3.38137	3.43062	3.27037	3.32935	3.39626	3.37684	3.41153	3.39685	3.41226	3.48605	3.41539	3.45567	3.48317	3.4292	3.48561	3.42935	3.49483	0.0287805	0.0477041	0.0365091	0.0299778	0.0390507	0.0206325	0.029058	0.0222989	0.041763	0.0483178	0.0369245	0.0296481	0.050149	0.0248305	0.0277282	0.0394031	0.0374992	0.0180595	0.0243224	0.037642
axo00782-f_at	7.40905	7.51907	7.74433	8.01526	8.11906	8.24666	8.03477	7.97866	7.76644	7.86533	7.73846	7.85269	7.6735	7.98977	7.79061	7.81107	7.88632	8.31591	8.14577	7.98083	0.0450118	0.0304077	0.0434025	0.0283279	0.0318076	0.0356141	0.0396098	0.0236004	0.0554889	0.0291602	0.0434897	0.0363192	0.0353112	0.02873	0.0368925	0.0472295	0.039525	0.0354058	0.04555	0.0504264
axo00783-r_at	9.59376	9.52975	9.38279	9.21263	9.32152	9.10753	9.04188	9.30758	9.2316	9.1554	9.46302	9.29689	9.31233	9.42987	9.59755	9.51228	9.67732	9.7869	9.51167	9.73247	0.0540954	0.0159778	0.0643648	0.0433358	0.0543944	0.0468427	0.0408613	0.0512611	0.0583823	0.0361488	0.0451383	0.0355885	0.0388636	0.0278788	0.0397518	0.0331954	0.0426386	0.0410327	0.0213475	0.0176519
axo00786-f_at	7.84082	7.20115	6.94961	6.86214	6.83336	6.86269	6.9227	6.84153	6.60776	6.56616	6.42346	6.49217	6.62708	6.71594	6.63736	6.72274	6.4068	6.61382	6.82272	6.64786	0.0607174	0.071783	0.0860344	0.0688386	0.0627291	0.0402474	0.0541399	0.0355388	0.0304125	0.0423854	0.0433755	0.0332336	0.0424345	0.0225809	0.0310372	0.0432304	0.0408243	0.0309559	0.0303176	0.0232937
axo00787-r_at	6.4956	6.51035	6.22185	5.93698	6.42719	7.2472	7.93662	8.37274	8.3565	8.07207	8.10717	8.12159	8.45716	8.24572	8.39014	8.52502	8.36097	8.59516	8.70352	8.31662	0.123035	0.129622	0.164615	0.15059	0.107024	0.0541897	0.0630696	0.0331092	0.0250104	0.0350461	0.0382082	0.0552865	0.026187	0.028192	0.0202981	0.0325919	0.0190802	0.0237867	0.0279349	0.0253795
axo00789-f_at	5.88905	6.01193	5.81069	5.87118	5.96918	6.12431	6.51609	6.84714	6.71605	6.49539	6.57477	6.62429	6.77805	6.66428	6.80285	6.7956	6.63917	6.90403	7.00372	6.80461	0.0632179	0.0588493	0.0634034	0.0101136	0.0438382	0.0330057	0.0434689	0.0266743	0.038925	0.0451828	0.0418918	0.0476694	0.0243809	0.0288909	0.0171161	0.0259069	0.0219833	0.0247359	0.0356865	0.0135294
axo00790-r_at	10.1335	10.154	10.2118	10.241	10.2216	10.3348	10.3574	10.4168	10.4835	10.7153	10.71	10.7099	10.7663	10.7119	10.6351	10.631	10.5236	10.5621	10.5768	10.678	0.016955	0.0223061	0.017545	0.0121991	0.0181224	0.0112137	0.00915153	0.0117582	0.0128071	0.00583381	0.0157126	0.010559	0.0107366	0.01022	0.00793543	0.0111666	0.0139007	0.00745931	0.00917905	0.00823571
axo00791-f_at	7.38607	7.51435	7.19329	7.16257	7.19657	7.63595	7.54627	7.45132	7.72162	7.76571	8.22986	8.04058	8.14822	7.91986	7.72065	7.85723	7.76157	7.82703	7.7089	7.51262	0.0591808	0.056318	0.066528	0.0332114	0.0480126	0.0346244	0.0624674	0.0427524	0.0683515	0.0424249	0.043637	0.0394393	0.0342653	0.0397397	0.0324332	0.0471169	0.0645158	0.0341518	0.0339939	0.062248
axo00792-r_at	7.80694	7.64586	7.41571	7.34168	7.28335	7.39049	7.52007	7.51332	7.51901	7.60054	7.60431	7.64662	7.52623	7.61184	7.55695	7.61272	7.62847	7.58151	7.61275	7.71999	0.0223012	0.0200015	0.024133	0.0294888	0.0222962	0.030731	0.0250199	0.0323844	0.0236203	0.0331695	0.0290797	0.0320527	0.0149945	0.0397939	0.0202106	0.0255294	0.0206804	0.0252369	0.0256022	0.0206458
axo00793-r_at	8.24992	8.18465	8.09503	8.22058	8.28911	8.18122	8.18443	8.04775	7.99184	8.10042	8.00661	8.11714	8.20675	8.3685	8.4637	8.33366	8.4409	8.32986	8.40391	8.49247	0.0281357	0.0271349	0.0116615	0.0258416	0.0294363	0.0113018	0.016309	0.0118167	0.0269346	0.0186928	0.0207222	0.0136197	0.0146827	0.0299855	0.0233547	0.0198321	0.0153503	0.0154363	0.0243723	0.0131213
axo00795-f_at	4.58922	4.4871	4.64218	4.69032	4.60213	4.8281	4.61754	4.65353	4.6249	4.64417	4.69474	4.70542	4.70353	4.69273	4.69437	4.56526	4.60465	4.71191	4.56128	4.55061	0.029098	0.0475802	0.0411557	0.0352755	0.0277527	0.033645	0.0391357	0.0321725	0.0373077	0.0459151	0.0345013	0.0489869	0.0554766	0.0519836	0.0433691	0.0524668	0.0441776	0.0287148	0.054067	0.037975
axo00796-r_at	4.00748	3.96522	3.88975	3.85793	3.84552	3.91013	3.80344	3.84187	3.79909	3.80744	3.87361	3.86887	3.7663	3.78712	3.77994	3.8338	3.7739	3.78832	3.96164	3.87988	0.0396545	0.0504751	0.0540352	0.0390635	0.0397935	0.0350419	0.0228989	0.05446	0.0405735	0.0307004	0.0463209	0.0434783	0.0400328	0.027846	0.0325611	0.0684767	0.0500475	0.0586016	0.0437684	0.0400586
axo00797-r_at	7.37541	9.07905	9.59509	9.07346	8.82966	8.27387	8.1232	8.00302	7.98492	8.35398	8.17098	7.96311	7.90307	7.81943	7.74533	7.63913	7.76045	7.62341	7.61915	7.75062	0.0271358	0.0188792	0.0357748	0.0549068	0.0313856	0.0563581	0.0249284	0.0306475	0.0376959	0.0299243	0.0572952	0.0300676	0.0383895	0.0424289	0.0354583	0.0283756	0.0287615	0.0346457	0.0256916	0.0222441
axo00798-f_at	4.94623	5.07691	5.03811	5.19874	5.10469	5.1442	5.11183	5.13839	5.08662	5.15771	5.11004	5.14574	5.26256	5.24987	5.20268	5.21055	5.12523	5.24603	5.16084	5.23148	0.0472927	0.0275133	0.0304621	0.0419818	0.0227659	0.0430389	0.0166367	0.0329468	0.0399532	0.030393	0.0304983	0.0256821	0.0261135	0.0294874	0.022715	0.0386567	0.0453475	0.0336766	0.026782	0.0248999
axo00799-f_at	3.84699	4.04906	4.03689	3.96459	4.02982	3.92754	3.95193	3.94102	3.87666	3.88982	4.05024	3.9778	4.03091	3.96842	3.9215	4.02778	3.99569	4.04571	3.90872	4.03344	0.0467632	0.0291196	0.0257885	0.0390626	0.0361868	0.0376428	0.0369672	0.0228305	0.0295606	0.0342869	0.0469601	0.0410597	0.0405326	0.0388671	0.0351313	0.0508432	0.0161425	0.031538	0.0275854	0.0422206
axo00800-f_at	4.04989	4.2234	4.33697	4.33827	4.52969	4.51738	4.40489	4.35508	4.47874	4.44785	4.52681	4.35747	4.32278	4.2077	4.17284	4.29642	4.25856	4.19756	4.11542	4.10532	0.057232	0.0341103	0.0486791	0.0421857	0.0393915	0.0511313	0.0516281	0.0371399	0.0571296	0.0536639	0.0660941	0.071164	0.062285	0.0507438	0.0406026	0.0478665	0.035912	0.0465906	0.0428671	0.0503105
axo00801-f_at	3.98059	3.93769	3.77065	3.85824	3.91689	3.81409	3.89158	3.90811	3.82121	3.84297	3.89402	3.83866	3.95868	3.90306	3.93827	3.90713	3.81847	3.80365	3.77433	3.78218	0.0604975	0.0314271	0.03394	0.0556722	0.0617065	0.0419162	0.039668	0.0377881	0.0472112	0.0506575	0.0439433	0.0370919	0.0520544	0.0453086	0.0266488	0.0582021	0.0441028	0.0615122	0.0388059	0.0679584
axo00804-f_at	6.06489	6.08308	6.30734	6.36853	6.61939	6.88627	6.87665	6.86285	6.91225	6.62416	6.6897	6.62023	6.39714	6.17548	6.05628	5.83725	5.93115	5.93715	5.6719	5.99522	0.0407278	0.0618044	0.0388277	0.0383296	0.0534263	0.0712177	0.0644868	0.0506889	0.0750062	0.0568191	0.0624249	0.0433855	0.104669	0.045619	0.0537506	0.0652574	0.0442465	0.0320265	0.0537253	0.0416003
axo00809-f_at	7.91985	10.2261	10.6574	9.83991	9.44116	9.28697	9.22593	9.31412	9.45545	9.84915	9.76333	9.54427	9.36691	9.34871	9.42027	9.29603	9.25889	9.24872	9.17495	9.18729	0.0528015	0.0140703	0.0238597	0.026501	0.0399191	0.0768447	0.0652648	0.0428713	0.0467995	0.0266241	0.0566057	0.0274952	0.0364299	0.02478	0.0330778	0.0496452	0.0392622	0.0413684	0.034994	0.0474899
axo00810-f_at	6.01229	6.05036	6.19204	6.39256	6.61412	6.56856	6.5898	6.64916	6.66236	6.91662	6.32351	6.69184	6.76821	6.67293	7.151	6.684	6.83477	7.23322	6.73409	6.83573	0.0519437	0.0809205	0.0816113	0.0506382	0.0670635	0.0654617	0.066094	0.0584667	0.077316	0.0778787	0.053782	0.0919506	0.0781098	0.0835979	0.0605039	0.0956111	0.106582	0.0934224	0.112084	0.0713797
axo00811-f_at	7.71251	7.6319	7.71552	7.75088	7.8015	7.89944	7.91116	7.97783	8.1221	7.98581	8.00862	8.07539	8.07598	8.2111	8.21126	8.14092	8.16964	8.21735	8.15739	8.19767	0.0306843	0.0263101	0.0217368	0.0160401	0.0227098	0.0182819	0.017219	0.0208274	0.0244884	0.0165896	0.0252087	0.0115207	0.025624	0.0186228	0.0169411	0.0159342	0.0241216	0.0161387	0.0237801	0.016718
axo00814-f_at	7.04891	7.0607	6.76113	7.01429	6.83192	6.17845	6.27035	6.57428	6.82105	6.73371	6.71157	6.87656	7.05764	7.09188	7.07028	7.10295	7.20898	7.02546	6.91842	7.09996	0.0407956	0.0413684	0.0472159	0.035644	0.0443413	0.0339433	0.0410743	0.0651714	0.0566906	0.0473328	0.036975	0.0423186	0.0319347	0.0282464	0.0435381	0.0564642	0.0561105	0.0286503	0.0337956	0.0313826
axo00815-f_at	6.88853	7.17015	7.27036	7.17614	7.01504	6.52832	6.14772	5.78692	5.98772	6.0423	6.48249	6.01082	6.28847	6.7656	6.56595	6.71149	6.51459	6.7157	6.52487	6.96324	0.055214	0.0749314	0.0709341	0.0623685	0.0586546	0.0674478	0.0919912	0.0715687	0.0524473	0.101098	0.066307	0.0927501	0.0803725	0.0438309	0.0473741	0.0602032	0.0549493	0.0587894	0.0420803	0.0672863
axo00816-f_at	3.54028	3.60899	3.46228	3.60175	3.60551	3.54075	3.56873	3.53422	3.54636	3.56504	3.57617	3.55927	3.54134	3.53936	3.51645	3.56231	3.4411	3.47155	3.49648	3.59833	0.0272911	0.0481924	0.0306821	0.035501	0.0345763	0.0398302	0.0616477	0.0390434	0.042999	0.0422673	0.038954	0.0332373	0.0451099	0.0365639	0.0474266	0.0488777	0.0516493	0.0450914	0.0506921	0.0411204
axo00818-f_at	7.79701	7.68865	7.81856	7.86526	7.89001	7.22465	6.99407	6.93648	6.9432	7.06113	7.023	6.99556	6.9822	7.08889	7.06817	7.0618	7.16352	6.9283	6.80535	6.78335	0.0423879	0.0436451	0.0373698	0.0311311	0.0259388	0.0506944	0.0293711	0.0612039	0.0334085	0.0483702	0.064345	0.06676	0.0389621	0.0494988	0.0572242	0.0358867	0.0536465	0.0392012	0.0479446	0.0619734
axo00819-f_at	4.40531	4.53341	4.59901	4.56797	4.52735	4.57219	4.62625	4.42196	4.44001	4.52049	4.49276	4.57668	4.5232	4.50765	4.56298	4.49028	4.50262	4.42763	4.56631	4.69686	0.0551684	0.0380972	0.0518736	0.0302783	0.0198573	0.0468867	0.0464439	0.0344486	0.0349291	0.0275466	0.0394452	0.0262676	0.0337585	0.0190265	0.0285063	0.0576811	0.0306707	0.0273664	0.05382	0.0368761
axo00820-f_at	6.18993	6.38743	6.85584	7.09528	7.03722	7.1914	7.051	7.13419	7.15679	7.35978	7.29127	7.2679	7.1783	7.16548	7.41908	7.12187	7.1426	7.15439	7.17344	7.24674	0.0602867	0.0756041	0.0271331	0.0349503	0.0605496	0.0392211	0.0262846	0.034015	0.0416224	0.0444816	0.0538076	0.0384362	0.0394524	0.0196188	0.0608383	0.0311464	0.0222254	0.0227316	0.033366	0.0269545
axo00821-r_at	4.72566	4.77759	4.98597	4.73835	4.79558	4.99376	5.00109	5.01247	4.89446	4.92103	4.80512	5.02087	5.01054	4.89104	4.95879	5.05723	5.08882	5.30777	5.04195	5.02902	0.0492238	0.0572796	0.122839	0.0661173	0.0663304	0.0668315	0.0372478	0.0272393	0.048669	0.0431976	0.029641	0.0292354	0.0446418	0.0611244	0.0370528	0.0346061	0.0321826	0.0435072	0.0330268	0.050961
axo00823-f_at	3.22712	3.11352	3.05775	3.22505	3.21279	3.24021	3.17497	3.27901	3.229	3.25417	3.32807	3.28691	3.27191	3.30158	3.29145	3.37973	3.38204	3.28163	3.26243	3.20518	0.0364295	0.0525208	0.021789	0.041446	0.0401535	0.0285339	0.0410214	0.0513039	0.0339984	0.0468713	0.0541303	0.0483706	0.0393087	0.0409065	0.0332321	0.0390011	0.0456229	0.0420031	0.0507172	0.0398034
axo00825-f_at	6.28771	6.29771	6.50599	6.70976	6.78204	6.858	6.75324	6.81619	6.80501	6.68866	6.6659	6.78052	6.59352	6.75999	6.91932	6.65568	6.47271	6.56452	6.46737	6.65165	0.0307317	0.0341041	0.0444564	0.045021	0.0295805	0.0463019	0.0412645	0.0325665	0.0361098	0.0747361	0.0356527	0.0332989	0.0720225	0.0239386	0.0251482	0.0213676	0.0560642	0.0509534	0.0678131	0.0596198
axo00826-r_at	7.49566	7.77395	6.91923	7.35416	7.29325	7.32508	7.469	7.35788	7.68333	7.63576	7.46005	7.69409	7.47281	7.59585	7.56037	7.81028	7.75192	7.87429	7.49359	8.2722	0.0880595	0.0860562	0.0970961	0.0789363	0.114819	0.100541	0.0720503	0.10791	0.0776086	0.0871132	0.0969818	0.0890522	0.102678	0.088564	0.0683766	0.0895462	0.0699352	0.0775606	0.0830763	0.066819
axo00827-r_at	5.1526	5.11272	5.14662	5.26282	5.28879	5.08468	5.16253	4.98349	4.90188	5.1449	4.99804	5.02842	5.00973	4.95701	4.62904	5.20995	5.08311	4.87222	5.12278	5.06905	0.0541896	0.0204803	0.0676323	0.0264729	0.0419247	0.0459319	0.068729	0.0481852	0.0386167	0.0756531	0.0403891	0.0824734	0.0677354	0.0842855	0.0434971	0.100274	0.0617356	0.0455892	0.064826	0.0497573
axo00828-f_at	9.95271	9.83246	9.81312	9.74559	9.75568	9.4535	9.53549	9.29395	9.17415	9.30235	9.29955	9.30056	9.22111	9.21227	9.24092	9.23362	9.24005	9.24879	9.25509	9.39303	0.0163257	0.0201853	0.0226216	0.0203976	0.0228089	0.0196031	0.0226511	0.017341	0.0230341	0.021734	0.0226192	0.0237186	0.0384488	0.0190855	0.0223102	0.0233341	0.0340031	0.020161	0.0243193	0.0333548
axo00829-r_at	6.79432	6.83905	6.83957	6.56434	6.35502	6.7315	6.9507	6.89633	7.00947	6.97127	6.92115	6.96282	7.19299	7.32988	7.34519	6.95821	7.40029	6.82885	7.12744	6.99258	0.0707511	0.0653052	0.042903	0.0909666	0.0612354	0.0421526	0.0510176	0.042686	0.074803	0.0569467	0.0681943	0.0502757	0.0591909	0.0654328	0.0731326	0.0672474	0.0647077	0.0655571	0.0512153	0.0327489
axo00830-f_at	8.99482	8.82304	8.67962	8.53902	8.30842	8.24339	8.49127	8.67572	8.76114	8.65601	8.73307	8.69957	8.79264	8.77129	8.95591	8.88492	8.83945	8.86202	8.88541	8.85871	0.0151306	0.0165377	0.013153	0.026365	0.0202817	0.0319229	0.0205347	0.0159465	0.0229329	0.0392915	0.0367884	0.0235764	0.0350227	0.0248608	0.0255173	0.0262823	0.0294335	0.017813	0.0162782	0.0327556
axo00831-f_at	3.68795	3.71642	3.68206	3.65443	3.71532	3.65849	3.69453	3.62062	3.70317	3.65347	3.71847	3.70012	3.76975	3.71669	3.74838	3.74365	3.68745	3.77803	3.71777	3.87569	0.0292584	0.0273609	0.0333633	0.0387476	0.037543	0.026515	0.0278238	0.0286346	0.0226306	0.0337783	0.0293775	0.0254834	0.03517	0.0257017	0.0405847	0.0361938	0.0335894	0.0279287	0.0575831	0.0460479
axo00832-f_at	7.34323	7.29085	7.16286	7.08762	7.15169	7.06519	7.03723	6.75565	6.85373	6.96159	7.16339	7.10458	7.17687	7.18264	7.09118	7.03115	7.49958	7.56338	7.60526	7.31391	0.0429232	0.0428336	0.0834121	0.0783688	0.0526648	0.0580871	0.0455507	0.162569	0.0639253	0.0744147	0.0306946	0.0705661	0.029814	0.042944	0.0633538	0.152728	0.0214976	0.0445817	0.0370956	0.0699206
axo00833-f_at	9.01346	9.25901	9.10878	9.61588	9.17213	9.40325	9.15423	8.94428	8.91346	9.33971	9.73286	9.72119	9.30832	9.49361	9.39246	9.87715	9.8647	9.45167	9.33876	9.48984	0.0592241	0.0491642	0.0521906	0.0297817	0.0421883	0.055608	0.0983011	0.0592723	0.0497259	0.0453087	0.0263017	0.0315749	0.0630316	0.049207	0.0557579	0.0424983	0.0621568	0.102423	0.0611503	0.0568149
axo00836-r_at	6.08121	6.29892	6.51397	6.7125	6.74402	6.73899	6.65547	6.72932	6.7002	6.77016	6.80852	6.9254	6.85273	6.8807	6.95634	6.73926	6.77696	6.9147	6.84145	6.86657	0.0288378	0.0346506	0.0374652	0.0205389	0.0309089	0.0253271	0.0256969	0.0214361	0.0214201	0.0289807	0.0185725	0.0143285	0.0217486	0.012248	0.0299079	0.0288491	0.0237113	0.0234251	0.0168723	0.0226484
axo00837-f_at	4.77117	5.04372	5.08713	5.22849	5.24869	5.42958	5.17114	5.16652	5.14584	5.17267	5.14643	5.13991	5.06678	4.88313	5.04926	5.03854	5.05145	4.94253	5.08748	4.94898	0.0354532	0.0554351	0.0462228	0.0583795	0.054205	0.0529566	0.0296278	0.0402691	0.0219954	0.0404626	0.0341781	0.0298619	0.0314045	0.0343667	0.0338297	0.0476024	0.0297118	0.0319926	0.0491743	0.038594
axo00838-f_at	4.35579	4.59017	4.56715	4.70168	4.76268	4.74429	4.74957	4.63038	4.56491	4.73169	4.94725	4.83054	4.78188	4.74554	4.72215	4.74656	4.76544	4.68415	4.68365	4.77656	0.0468275	0.0477883	0.0302964	0.0388507	0.0388148	0.0494877	0.0676764	0.0710008	0.0422809	0.0340135	0.0567775	0.0574432	0.05958	0.0488634	0.051316	0.0546425	0.0596838	0.0451023	0.0505359	0.0388771
axo00840-f_at	9.6756	9.5453	9.42032	9.4477	9.23714	8.7599	8.58111	8.51833	8.48215	8.45668	8.31849	8.26752	8.33463	8.38658	8.34022	8.55841	8.5324	8.46071	8.45001	8.4529	0.0435966	0.0359096	0.0421528	0.0525831	0.0354317	0.0277477	0.0299034	0.037814	0.0421876	0.0245346	0.0343886	0.0334861	0.0369645	0.0191115	0.0296488	0.0331014	0.0271623	0.0157621	0.0275017	0.0313137
axo00841-r_at	10.1233	10.3442	10.7124	10.7954	10.7462	10.7373	10.5742	10.3619	10.178	10.9346	11.1399	11.0674	10.7575	11.0921	10.9556	11.1178	10.8975	11.3861	11.1728	11.4118	0.0238406	0.0268531	0.0252205	0.0327645	0.0299766	0.042479	0.0530933	0.0599772	0.0334079	0.0315822	0.0428389	0.0566151	0.0390384	0.0274337	0.0298054	0.0311043	0.0452268	0.0163821	0.0292724	0.0395303
axo00842-f_at	3.97601	4.08798	4.06396	4.06257	3.93343	3.97827	3.97627	3.92379	3.90347	3.93372	3.9716	3.91521	3.95412	3.93797	3.86621	3.96762	3.96964	3.90756	3.94517	4.01386	0.0428299	0.0581741	0.0396423	0.038893	0.0363937	0.033744	0.0337408	0.0252569	0.0372295	0.0293529	0.024304	0.0245368	0.0392869	0.043716	0.0234303	0.0367155	0.0333119	0.0192653	0.0390079	0.025575
axo00845-f_at	7.99916	8.01123	7.92193	7.82929	7.95232	8.44496	8.527	8.52532	8.51944	8.4939	8.71352	8.73106	8.76996	8.7728	8.67735	8.79673	8.77574	8.9107	8.88174	8.75804	0.0372758	0.0334288	0.0403061	0.0493933	0.0214321	0.0267297	0.0258845	0.0127679	0.0307296	0.0365465	0.0214225	0.0155192	0.00919086	0.0186681	0.0172497	0.0214646	0.0140965	0.012257	0.0129093	0.0112693
axo00847-r_at	5.78337	6.39054	6.92297	6.67401	6.49268	6.13759	6.04692	6.27037	6.38767	6.56214	6.59176	6.58516	6.3546	6.3354	6.21707	6.21768	6.11027	6.30685	6.14952	6.33029	0.0254386	0.0272063	0.0434291	0.0261256	0.0590353	0.0437937	0.0357173	0.0739737	0.0530745	0.0496078	0.0433207	0.0502899	0.0656101	0.0352403	0.038289	0.0389303	0.0312353	0.0517889	0.0201552	0.0236267
axo00848-f_at	7.30798	6.81527	6.81891	6.67066	6.57772	6.13467	6.12154	5.9386	6.04309	5.96367	5.90317	6.16397	6.00274	6.12171	6.04573	6.07549	5.93911	5.79166	6.10384	6.07367	0.0498135	0.0330841	0.0540708	0.0426862	0.0635869	0.0275043	0.0433339	0.0533092	0.0613183	0.046815	0.0538236	0.0494771	0.0549282	0.0641056	0.0621197	0.0443769	0.0503845	0.0497792	0.0679109	0.0585906
axo00849-f_at	6.74595	6.75495	6.66493	6.6792	6.48208	6.38293	6.27268	6.25223	6.20296	6.2435	6.50293	6.37754	6.23477	6.30031	6.21185	6.43339	6.37197	6.37021	6.27705	6.27152	0.060198	0.0566833	0.0614071	0.0818284	0.0589782	0.0724825	0.0567634	0.0732784	0.0689951	0.0668876	0.0423833	0.0521157	0.0548739	0.0697176	0.049486	0.0441383	0.0326228	0.0246972	0.01925	0.0257436
axo00850-f_at	4.0129	4.06098	4.06469	4.14269	4.2197	4.24818	4.11948	4.1017	4.09889	4.18999	4.11701	4.1948	4.21401	4.09119	4.08112	4.17739	4.09684	4.06724	4.15877	4.12694	0.0625584	0.0469176	0.0490002	0.0402929	0.0419941	0.0480188	0.0175675	0.0560585	0.0369486	0.0505853	0.0388077	0.0444369	0.0510007	0.0371934	0.0475	0.0472412	0.0290271	0.0454184	0.0398799	0.0258121
axo00851-r_at	8.97869	9.16378	8.93108	9.1135	9.23071	9.15677	9.18069	9.06207	9.26054	9.12409	9.16938	9.30533	9.3272	9.3417	9.02038	9.09947	9.23177	9.10277	9.16754	9.18353	0.0402964	0.0336419	0.0345807	0.0363379	0.0365134	0.0706127	0.065506	0.0618685	0.0374455	0.0381956	0.0452558	0.0456105	0.0273594	0.0421759	0.0428252	0.0504919	0.0338827	0.0390194	0.0269087	0.021938
axo00853-f_at	4.94281	4.98169	5.1268	4.98291	5.00643	5.1423	5.17239	5.0198	5.08467	5.06036	5.02824	4.95479	5.01903	4.9455	4.90358	4.89556	4.93078	4.96845	5.00951	5.03858	0.054907	0.0593789	0.0454707	0.0529972	0.0534931	0.0685286	0.0564228	0.0527782	0.0549322	0.0498035	0.0574429	0.0461705	0.051337	0.0575956	0.0413371	0.0335369	0.0662728	0.029596	0.0368424	0.0575559
axo00854-f_at	3.63019	3.73427	3.72997	3.75651	3.81564	3.73699	3.86428	3.78014	3.95214	4.02294	3.74884	3.8964	3.84034	3.89723	3.89344	3.76004	3.75639	3.81575	3.83235	3.90264	0.034452	0.0196069	0.032158	0.0431007	0.0456044	0.0541946	0.0613217	0.0429171	0.0544227	0.127307	0.0439744	0.0675881	0.0677312	0.0682422	0.0882016	0.0398021	0.0363132	0.0366385	0.0493297	0.0536089
axo00857-f_at	8.1681	8.13065	8.09877	7.94457	7.77423	7.65766	7.65862	7.70344	7.84691	7.73038	7.95812	7.93788	7.9584	7.9847	7.98803	8.07678	8.07057	7.83584	7.88318	8.11635	0.0410176	0.035166	0.0252787	0.0321515	0.0231879	0.0230871	0.0245613	0.0242717	0.0439461	0.0207635	0.0214153	0.0254611	0.0299776	0.0358537	0.0164352	0.0290293	0.0241873	0.0208332	0.0211061	0.0211579
axo00858-f_at	6.81771	6.97099	6.82194	6.90121	6.75587	6.54559	6.63985	6.66386	6.60606	6.57796	6.72041	6.65375	6.73935	6.67457	6.60791	6.85554	6.72247	6.68473	6.78205	6.77975	0.0498552	0.0483909	0.0460338	0.0438781	0.0358614	0.0401729	0.0363396	0.0351922	0.0444004	0.03879	0.0278121	0.0405319	0.0352569	0.0400166	0.0459525	0.0305515	0.0212083	0.0321137	0.0327495	0.0281983
axo00859-f_at	7.83706	7.6422	6.96025	6.59646	6.67934	6.84325	6.8429	6.67876	6.91397	6.73426	6.52087	6.53915	6.60463	6.97443	7.22522	6.71805	7.07062	6.76435	6.96777	7.22758	0.0633974	0.0620738	0.0607393	0.0543563	0.0543108	0.0693707	0.0351671	0.0626463	0.073997	0.0650906	0.0754565	0.0495086	0.0503472	0.0772376	0.0562932	0.040479	0.0351203	0.045991	0.0377879	0.0329905
axo00860-f_at	6.36123	6.33213	6.29794	6.22452	6.20995	5.94892	6.01428	6.03493	5.94311	5.84298	5.97743	6.00538	5.94469	6.02193	6.02646	6.1527	6.12062	5.93546	6.01299	6.25058	0.061326	0.0661959	0.0520437	0.0588526	0.0559232	0.0365965	0.0346501	0.0351646	0.0418452	0.0263954	0.0245638	0.0367903	0.0292469	0.0272033	0.0301008	0.0265101	0.0280276	0.0316248	0.0383003	0.0295157
axo00861-r_at	5.2482	5.22337	5.20318	5.01042	4.90856	4.56662	4.74201	4.90254	4.99052	5.07698	4.69524	4.81032	5.07832	4.8882	5.20182	5.00166	4.89907	5.14412	5.26394	5.22354	0.0737789	0.0693551	0.0734298	0.0786069	0.100786	0.0705981	0.0886209	0.0832778	0.083693	0.0625426	0.0771847	0.0542031	0.0642037	0.0457754	0.0702898	0.0708443	0.087044	0.0531816	0.0647095	0.0572116
axo00863-r_at	8.10467	7.88971	7.86855	7.75496	7.72331	7.65778	7.70502	7.69134	7.58966	7.67819	7.74035	7.83455	7.7935	7.95494	8.03692	8.09538	8.16362	8.11588	8.2046	8.19356	0.0150733	0.0187616	0.0248094	0.0185643	0.0172231	0.0187226	0.026608	0.0318157	0.0204723	0.0281194	0.0222763	0.0185856	0.030808	0.0195007	0.0187922	0.0268442	0.0274837	0.0234948	0.0131341	0.021483
axo00864-r_s_at	8.37411	8.15526	8.20132	7.88579	8.00389	7.57746	7.72786	7.73497	7.72395	7.84801	8.05863	7.94892	7.85511	8.02525	8.13324	8.22472	8.23826	8.20832	8.48275	8.11151	0.0399717	0.0438767	0.044142	0.0530571	0.0537142	0.0686169	0.0515879	0.036475	0.0395448	0.0360906	0.0255698	0.0518898	0.0525013	0.053049	0.0362731	0.0423961	0.0401284	0.0428853	0.0333966	0.0522334
axo00865-r_at	10.0412	9.90637	9.89816	9.59097	9.73509	9.24731	9.40383	9.38306	9.43915	9.57432	9.73081	9.64118	9.51557	9.6849	9.78285	9.85405	9.82862	9.79477	10.1048	9.80831	0.0281166	0.0279914	0.0382274	0.0556748	0.0394097	0.0562611	0.0426259	0.0237808	0.0294543	0.02963	0.018369	0.043387	0.044321	0.0441255	0.0340048	0.0361092	0.0306728	0.034126	0.0256264	0.0379718
axo00866-r_s_at	9.27915	9.13918	9.0269	8.8484	8.87971	8.58066	8.77754	8.70129	8.70358	8.78693	9.03101	8.93754	8.81461	9.00164	9.04548	9.19312	9.23431	9.2149	9.39639	9.1682	0.0257601	0.0279564	0.0270511	0.0315416	0.0398007	0.0553079	0.0329173	0.0271015	0.0245329	0.0320724	0.0230632	0.0352864	0.0357076	0.0389429	0.0276187	0.0327446	0.0318289	0.0256687	0.0276212	0.0200375
axo00867-f_at	11.6678	11.4233	11.2699	11.298	11.2015	10.9914	10.9782	10.8818	10.9163	10.8468	10.9579	10.9963	11.1141	11.1436	11.1919	11.3646	11.3926	11.2962	11.3928	11.3639	0.0129407	0.0170302	0.0140304	0.00843165	0.0159202	0.0125769	0.00756136	0.0105502	0.011437	0.0171775	0.0173397	0.0107481	0.0135914	0.0162015	0.0129397	0.0159593	0.0153112	0.0126177	0.00955625	0.0136593
axo00868-f_at	9.45391	9.376	9.37388	9.32695	9.39403	9.49135	9.60038	9.78666	10.052	10.2015	10.1733	10.0885	10.2339	10.2795	10.181	9.96523	9.75304	9.55495	9.4668	9.67464	0.0200741	0.0159653	0.0211656	0.0162939	0.0174425	0.0134695	0.0151827	0.0154407	0.0250259	0.0215797	0.0150593	0.0197038	0.0272079	0.0320627	0.0218167	0.0379185	0.0283832	0.0345769	0.0219977	0.0511496
axo00870-r_at	3.7374	3.73116	3.73522	3.81714	3.76068	3.58852	3.62081	3.66905	3.6539	3.59762	3.62547	3.62779	3.58394	3.67835	3.64296	3.55845	3.69261	3.5675	3.59196	3.6492	0.055631	0.0313603	0.0232095	0.0446182	0.0332503	0.0320196	0.0200878	0.0263813	0.0429191	0.0513455	0.0525328	0.0347647	0.0344227	0.0292265	0.0236987	0.0320978	0.0462551	0.0345547	0.042649	0.0325581
axo00871-f_at	9.94547	10.0368	10.0744	10.1352	10.2876	10.3814	10.3831	10.3977	10.3761	10.4466	10.3876	10.3939	10.4295	10.4334	10.4869	10.5341	10.5222	10.6633	10.6017	10.5582	0.0154614	0.0259646	0.0166769	0.018329	0.00767921	0.025552	0.0141116	0.00555535	0.0130474	0.0103528	0.0101409	0.0122845	0.0117011	0.00585026	0.0104829	0.0128463	0.0123319	0.0160816	0.0126946	0.0190426
axo00873-r_at	3.99053	4.02029	4.01851	3.96833	3.92313	4.02133	4.02797	3.95471	3.92635	3.88165	3.8908	3.90057	3.9037	3.93574	3.94356	3.86594	3.92173	3.95159	3.90786	3.94937	0.0272611	0.034462	0.0552541	0.0399033	0.0379327	0.0579883	0.0672624	0.0386845	0.0504143	0.0332931	0.0619254	0.03233	0.0759825	0.0415113	0.0698518	0.0258929	0.0363779	0.0276938	0.0428736	0.0278444
axo00874-f_at	5.31285	5.20975	5.15937	5.08424	4.96788	5.20117	5.23139	5.22569	5.16745	5.01461	5.07486	5.05817	5.24765	4.98835	5.09241	5.07925	5.0235	5.07346	5.07159	5.10635	0.0544491	0.0454972	0.0656234	0.0662259	0.0529711	0.0678825	0.0816662	0.0519078	0.0733345	0.0351935	0.0574639	0.0571407	0.0656406	0.0407113	0.0676418	0.0557248	0.0385638	0.0562019	0.0532079	0.0491151
axo00875-f_at	4.16832	4.14596	4.12908	4.31031	4.28364	4.26445	4.27196	4.25838	4.32004	4.40147	4.50472	4.46249	4.40855	4.30825	4.30243	4.42277	4.38931	4.45597	4.51339	4.42487	0.0360534	0.0353634	0.0252346	0.0204787	0.0386743	0.0399784	0.0388131	0.0301791	0.0534349	0.0419007	0.0333907	0.0373394	0.0268186	0.0622915	0.0310121	0.0531912	0.0350044	0.0267436	0.0422198	0.0462674
axo00876-f_at	5.17841	4.62751	4.82467	5.20697	5.05555	4.89282	4.85274	4.96026	4.9674	5.09638	4.8781	5.03847	5.19882	5.265	5.2163	5.06631	5.22952	5.3113	5.24542	5.26534	0.051385	0.050034	0.0773901	0.063634	0.0776652	0.0891944	0.0597262	0.0628586	0.0612391	0.0631962	0.0679575	0.0492332	0.0795726	0.0540145	0.0716331	0.067851	0.0802846	0.0528444	0.0752096	0.0658168
axo00877-f_at	4.32019	4.01355	3.87615	3.93196	4.01403	3.84148	3.8741	3.86845	3.95659	3.96147	3.87801	3.82487	4.05656	4.00431	4.11444	4.09341	4.24466	4.11326	4.16742	4.0935	0.0688903	0.0621048	0.0609502	0.0653054	0.0489093	0.025656	0.0373554	0.0368424	0.0452645	0.0295258	0.0464818	0.0238624	0.0273039	0.0439996	0.0378533	0.0355785	0.0324099	0.0345695	0.0337574	0.0335467
axo00880-r_at	4.2647	4.23866	4.24928	4.23876	4.26177	4.12552	4.03187	4.04176	4.10347	4.06598	4.15932	4.13927	4.05458	4.08539	3.99575	4.04176	3.95807	4.00321	4.01401	4.05076	0.0572738	0.0579579	0.0497928	0.0417495	0.0413927	0.0705277	0.0474489	0.0330137	0.0333738	0.0498292	0.043198	0.0338724	0.0350335	0.040959	0.0396078	0.0274487	0.0434573	0.0335689	0.0293805	0.0513912
axo00881-r_at	3.87785	3.87201	3.7517	3.9211	3.732	3.77517	3.68063	3.71268	3.70017	3.78694	3.68488	3.75435	3.71244	3.71318	3.66466	3.68242	3.73499	3.71257	3.71181	3.78224	0.0388569	0.0663311	0.0323728	0.0577459	0.0536416	0.0305933	0.0392577	0.0343567	0.0196835	0.0342768	0.0394007	0.0335375	0.0423818	0.047911	0.0427713	0.0564624	0.0324951	0.0211259	0.0512975	0.0252097
axo00882-r_at	3.77042	3.883	3.81923	3.82243	3.79327	3.73741	3.68241	3.72974	3.76189	3.74708	3.72553	3.79899	3.8244	3.70642	3.71889	3.74462	3.79746	3.74312	3.81965	3.91096	0.0376038	0.0535613	0.0254481	0.0325875	0.0329714	0.0527784	0.0392751	0.0321066	0.0204841	0.0658467	0.039319	0.0372793	0.0326173	0.0357114	0.0314292	0.0347295	0.0419808	0.0505563	0.0312565	0.0674158
axo00883-r_at	5.16905	5.00847	5.21066	5.48635	5.46883	6.1639	5.97109	5.78164	5.83833	5.60322	5.97766	5.47596	5.21009	4.96503	4.91363	5.07534	5.1253	5.01139	4.75694	4.66909	0.106086	0.0983896	0.114369	0.0722216	0.0843859	0.186693	0.166161	0.151033	0.168038	0.134397	0.0764893	0.0614607	0.0638516	0.0758963	0.0416164	0.066195	0.0511353	0.0518622	0.0342469	0.0310583
axo00885-r_at	3.64535	3.63271	3.57048	3.64898	3.57905	3.5374	3.56722	3.54482	3.54647	3.62241	3.63814	3.54238	3.62273	3.61456	3.60502	3.65513	3.6235	3.64698	3.70198	3.65416	0.0377474	0.0276883	0.0202205	0.0439406	0.0355902	0.0254472	0.045634	0.0245855	0.0348928	0.0243372	0.0200487	0.0294921	0.044044	0.0435511	0.0312357	0.031293	0.0375469	0.0280469	0.0368262	0.0395992
axo00886-f_at	4.11602	4.21363	4.16924	4.09594	4.07092	4.11573	4.16882	4.14724	4.12005	4.21122	4.14371	4.13905	4.14479	4.097	4.08756	4.07059	4.01379	4.07202	4.05753	4.1168	0.0437361	0.059285	0.0290945	0.0412717	0.0439134	0.0280228	0.0300217	0.0501769	0.0524347	0.0435552	0.0248663	0.0336453	0.0510968	0.0384891	0.0447219	0.049348	0.069583	0.0400873	0.0624031	0.0473595
axo00887-r_at	4.19442	3.88926	3.92118	3.92214	3.90719	3.91323	3.85712	3.88194	3.76942	3.87866	4.01283	4.05329	3.90213	3.94029	3.9948	3.98448	4.1148	4.01416	3.90807	3.88705	0.0788912	0.080549	0.0483276	0.0615632	0.0721106	0.0501936	0.0760558	0.0571263	0.0430639	0.0584605	0.0567612	0.0418144	0.0468973	0.0542125	0.0560033	0.0762959	0.0806175	0.0366528	0.0233726	0.0537697
axo00889-f_at	4.33741	4.41325	4.3032	4.46788	4.40634	4.3671	4.31718	4.27157	4.31868	4.30931	4.43183	4.35361	4.40649	4.31692	4.36669	4.50106	4.32862	4.3197	4.29167	4.39425	0.0498905	0.0324257	0.0312389	0.0370789	0.0411903	0.055705	0.0459678	0.044043	0.0452989	0.0384088	0.0479738	0.0540081	0.0439139	0.0486805	0.0280421	0.0487477	0.0543563	0.025898	0.0487723	0.0661908
axo00892-f_at	3.11779	3.12971	3.11464	3.24949	3.24098	3.31838	3.27571	3.15464	3.21516	3.11152	3.18274	3.1111	3.12391	3.08903	3.09347	3.08351	3.10349	3.07475	3.05561	3.0222	0.0356156	0.0492316	0.0452799	0.0588435	0.0535449	0.041413	0.0320408	0.0384421	0.0483365	0.0445335	0.0316295	0.0245944	0.0541936	0.0386537	0.0275232	0.0310386	0.0469904	0.0247335	0.0346625	0.0230546
axo00893-r_at	4.98121	5.24185	6.06141	6.23632	6.83029	7.2362	7.16468	7.15052	6.95557	6.41522	6.38088	6.29114	6.03835	5.6745	5.63293	5.3879	5.59092	5.37083	4.85902	5.25849	0.039817	0.0877669	0.0938654	0.103563	0.0890496	0.0877718	0.0965087	0.0693835	0.0841489	0.083972	0.0952092	0.0850734	0.129985	0.0863049	0.0572228	0.101298	0.0561865	0.0553584	0.101374	0.0789648
axo00894-f_at	3.54884	3.66583	3.70108	3.72073	3.70626	3.64387	3.70205	3.6693	3.63332	3.71511	3.67357	3.71265	3.68054	3.77192	3.72429	3.76711	3.74036	3.71492	3.79656	3.82113	0.0407831	0.0527174	0.0317259	0.0325265	0.0346707	0.0562459	0.0302952	0.0355778	0.0408564	0.0627066	0.0449817	0.043027	0.0371088	0.043276	0.0554975	0.0373506	0.0539044	0.0485049	0.0352832	0.0423667
axo00895-f_at	4.32446	4.59063	4.50822	4.55059	4.52928	4.4602	4.49462	4.5315	4.53856	4.48778	4.50768	4.51147	4.51214	4.55756	4.51611	4.49729	4.49691	4.62306	4.63872	4.59514	0.0482823	0.0450572	0.0335837	0.0337573	0.0382607	0.0412294	0.0368967	0.0241167	0.0430488	0.0269152	0.0190043	0.0424871	0.0368754	0.0188652	0.0277522	0.0369009	0.0305431	0.0240673	0.0554767	0.0312989
axo00896-f_at	6.14611	6.62727	6.87261	7.02685	7.24247	6.81322	6.76664	6.70347	6.50806	6.29736	6.12307	6.16451	6.11337	5.65837	5.73819	5.70908	5.73481	5.77924	5.7599	5.88507	0.0499867	0.061276	0.0733658	0.042167	0.0268491	0.0678995	0.058122	0.0464321	0.0453863	0.0480961	0.0383501	0.0245509	0.0682515	0.0427479	0.058151	0.0276817	0.0454042	0.0349635	0.0363416	0.0432968
axo00897-f_at	8.46109	7.84524	7.34565	7.09501	6.94376	6.4486	6.39008	6.60285	6.33975	6.47648	6.11842	6.24886	6.41369	6.76154	6.89526	6.6427	6.9659	6.77222	6.95143	6.90012	0.05971	0.0855116	0.0505049	0.0744896	0.0972688	0.0549497	0.0614438	0.0345795	0.0528005	0.04561	0.0699294	0.0744284	0.0457021	0.069621	0.0471937	0.0962401	0.0892446	0.0593236	0.0483412	0.0292751
axo00899-r_at	8.64321	8.52539	8.51631	8.41089	8.47976	8.441	8.53649	8.60754	8.67439	8.53494	8.47645	8.39242	8.47941	8.43704	8.38035	8.362	8.26997	8.21937	8.2888	8.34566	0.018038	0.0175752	0.016878	0.0175937	0.0173061	0.0094247	0.00726358	0.0195283	0.0157402	0.0102811	0.0105671	0.0134469	0.00847379	0.0121696	0.0137467	0.0270074	0.0184531	0.0143781	0.0135323	0.0189659
axo00900-r_at	4.80742	4.98327	4.94729	4.93106	4.85876	4.85993	4.79799	4.85572	4.88778	4.80539	4.93195	4.9634	4.92138	4.8906	4.9141	4.93437	4.91833	4.94801	4.7889	4.8625	0.0211959	0.0533726	0.0346525	0.054044	0.0423457	0.0312043	0.0374013	0.0224444	0.0447324	0.0270348	0.0439366	0.0370438	0.0255407	0.041617	0.0325211	0.0355189	0.0276642	0.0386465	0.0493198	0.0360882
axo00903-f_at	3.72964	3.80595	3.76201	3.7819	3.69741	3.68519	3.63939	3.6391	3.67598	3.73141	3.61075	3.77901	3.77588	3.67011	3.77622	3.70949	3.65701	3.71064	3.78833	3.79882	0.0463142	0.0446738	0.0251134	0.0507782	0.0291683	0.0222648	0.030163	0.0315079	0.0343001	0.041522	0.0371656	0.0275842	0.0344508	0.0331894	0.0303085	0.0377391	0.0313139	0.0323637	0.0335136	0.0505868
axo00904-f_at	3.38396	3.46175	3.37575	3.37474	3.44007	3.41427	3.42234	3.35146	3.4032	3.49358	3.44988	3.42329	3.41719	3.40853	3.40071	3.42558	3.35816	3.33368	3.49174	3.49575	0.0439732	0.0354267	0.039734	0.0345525	0.0605697	0.0327454	0.0306374	0.0375036	0.0304783	0.0324308	0.0441692	0.0388909	0.0414195	0.0409486	0.0539031	0.0382002	0.0407735	0.0449212	0.0541147	0.0275119
axo00906-f_at	4.82684	5.23351	5.25366	5.50816	5.3794	5.78845	5.60653	5.57221	5.60726	5.68218	5.71598	5.65544	5.64426	5.67264	5.49786	5.44703	5.54682	5.59292	5.4594	5.4161	0.0404736	0.0659539	0.0699598	0.0457741	0.0596052	0.0291455	0.0556315	0.0335857	0.0294024	0.0382385	0.0710999	0.0566019	0.0695388	0.0697373	0.055357	0.0627964	0.0521898	0.0444642	0.0539144	0.0420857
axo00907-f_at	5.21191	5.36051	5.3179	5.32777	5.40117	5.18704	5.25996	5.2569	5.22454	5.33543	5.3224	5.34899	5.29057	5.26802	5.30097	5.28221	5.3442	5.22172	5.39673	5.37647	0.0402751	0.0326772	0.0356829	0.0437585	0.0356897	0.0298709	0.0531329	0.0388412	0.0492319	0.055866	0.044843	0.0497531	0.044326	0.0421858	0.0271113	0.0316604	0.0396022	0.0257548	0.0378909	0.0466155
axo00909-f_at	4.9073	4.95529	4.84962	4.98041	4.84308	4.96088	5.01287	4.90769	4.94169	4.94911	4.98432	5.02457	4.99859	4.98817	4.95194	5.01967	5.09438	4.87365	4.9583	4.86887	0.019425	0.0425898	0.0317329	0.0396447	0.0231717	0.0350526	0.0286351	0.0404438	0.0254332	0.0215271	0.0301511	0.0352574	0.0241189	0.039434	0.0289002	0.0350156	0.0503234	0.0401302	0.0288586	0.0369243
axo00910-f_at	4.45099	4.87607	4.89522	4.96665	5.07293	4.91201	4.93672	4.92991	5.00354	5.05383	4.95153	5.024	5.01957	5.05	5.05502	5.08032	4.93472	4.91178	4.84533	4.93436	0.0506107	0.0649325	0.0363022	0.0578561	0.0654713	0.0564861	0.0367287	0.031307	0.0374782	0.0347863	0.0356016	0.0537533	0.0596228	0.0545137	0.0412221	0.0713289	0.043652	0.0469566	0.0457891	0.0348042
axo00912-f_at	6.79784	6.27611	6.51265	6.35865	6.44224	6.63577	6.48311	6.82924	7.0571	6.73027	6.82993	7.04864	7.29452	7.37047	7.88233	7.64376	7.71339	7.67931	7.01271	7.54397	0.0752394	0.0595872	0.0778657	0.0448848	0.086534	0.0707826	0.0729757	0.0438766	0.0618916	0.0895357	0.118904	0.120364	0.106422	0.0358325	0.0558603	0.0911287	0.0649096	0.0944628	0.0839242	0.0417054
axo00913-f_at	7.29726	7.23298	7.88083	8.30133	8.40305	8.43815	8.20919	8.0833	8.13675	8.21506	8.32788	8.3765	8.1047	8.05895	8.17486	8.09313	7.94391	8.11931	7.99647	7.98677	0.0855743	0.0639131	0.0257747	0.0270766	0.0276545	0.0255821	0.0281395	0.0192025	0.0258763	0.0333896	0.0292651	0.0247068	0.0330285	0.0295305	0.020491	0.0346206	0.0413625	0.0357415	0.0407633	0.0457292
axo00914-f_at	4.23266	4.443	4.38582	4.39233	4.44908	4.45735	4.39048	4.44501	4.42525	4.52575	4.36532	4.42132	4.46164	4.40474	4.44534	4.31782	4.39763	4.41113	4.35795	4.54617	0.0571806	0.0549699	0.0627341	0.0571266	0.0396084	0.0443162	0.0365615	0.0281805	0.0361491	0.0755762	0.0338663	0.0521744	0.0323801	0.0553104	0.0421298	0.0351724	0.0509534	0.0491376	0.0561434	0.0605654
axo00915-r_at	3.69662	3.7384	3.78777	3.81881	4.04408	3.94526	4.04043	3.89731	3.88258	3.86087	3.74282	3.75434	3.79361	3.85033	3.73905	3.90555	3.8268	3.87411	3.81165	3.67249	0.0635607	0.0592336	0.0525098	0.0804115	0.0467078	0.0471411	0.08348	0.0466246	0.0550948	0.0857596	0.0491399	0.0571033	0.0652744	0.0700717	0.0584495	0.0669783	0.0613958	0.11221	0.0593732	0.0454281
axo00916-f_at	3.98517	3.86916	3.8724	3.90589	3.8951	4.02214	3.97332	3.96047	3.95129	3.99755	3.93827	3.96334	4.00651	4.11445	4.19649	4.081	4.03971	4.07824	4.0442	4.00928	0.0231985	0.0471232	0.0345064	0.042074	0.0425738	0.0369191	0.0553009	0.0296405	0.0313377	0.0394725	0.0399262	0.0378148	0.0311051	0.0357023	0.0397277	0.0481999	0.0308864	0.0230472	0.0463726	0.0433866
axo00917-f_at	6.84708	6.68705	6.49538	6.66686	6.92142	6.77133	6.89765	6.99763	7.0943	7.07687	7.01052	7.09823	7.28603	7.34941	7.4174	7.39026	7.44979	7.38485	7.48183	7.38298	0.0301335	0.0359268	0.0392261	0.0245225	0.0442343	0.03305	0.0270202	0.0259375	0.0208076	0.0516358	0.044542	0.033804	0.0440459	0.0211044	0.0259683	0.0246846	0.0332559	0.0500199	0.0277604	0.0302793
axo00918-r_at	10.6337	10.5178	10.556	10.4503	10.4715	10.288	10.3321	10.3269	10.3672	10.4286	10.4709	10.5398	10.5465	10.7142	10.6796	10.7434	10.771	10.5937	10.7081	10.7011	0.0215735	0.00998414	0.0149786	0.0186652	0.0113254	0.00887401	0.0106916	0.0109507	0.00939695	0.00875761	0.0104217	0.0075574	0.01336	0.00736429	0.00813618	0.0125416	0.0111371	0.00829307	0.0100469	0.0109735
axo00920-r_at	5.90192	5.89706	5.91763	6.11087	6.09096	6.14525	6.04191	6.05951	6.01913	6.01817	6.13927	6.1682	6.14337	6.02432	6.13735	6.05451	6.10127	6.0552	6.00795	5.97679	0.0186198	0.0348487	0.0240241	0.0308246	0.0244157	0.0131704	0.0375877	0.0305336	0.036233	0.0310742	0.0298032	0.0176794	0.0312376	0.0488535	0.0244063	0.0397069	0.0267758	0.0240773	0.0296152	0.0310724
axo00921-f_at	3.64883	3.67903	3.74269	3.70052	3.78781	3.85836	3.76605	3.76121	3.80983	3.79719	3.7597	3.80984	3.68442	3.83012	3.76558	3.82764	3.79771	3.76384	3.81498	3.78288	0.0413992	0.0326717	0.0509616	0.061431	0.0394358	0.0441361	0.0477053	0.0525434	0.025357	0.071548	0.0375653	0.0458079	0.0308053	0.0338395	0.0347711	0.0527674	0.0648212	0.0537125	0.0440326	0.0590031
axo00922-f_at	3.32545	3.33966	3.25286	3.22826	3.27363	3.16019	3.21507	3.14212	3.17968	3.20147	3.24463	3.25059	3.27352	3.25805	3.25732	3.1773	3.26972	3.19195	3.15711	3.3447	0.0523916	0.0410083	0.0475842	0.0177063	0.0329847	0.0487996	0.0336795	0.0275534	0.0371421	0.0341499	0.0394515	0.0442391	0.0416233	0.0296786	0.0330284	0.0470058	0.0407905	0.0339156	0.0444159	0.0298705
axo00924-f_at	6.74726	6.74476	6.93155	6.84194	6.98923	7.00115	7.11881	7.22585	7.28816	7.42918	7.26379	7.20087	7.28954	7.29605	7.27162	7.25234	7.29268	7.3959	7.373	7.32758	0.0322435	0.0386973	0.0409255	0.0557935	0.040602	0.0365427	0.0376961	0.0302725	0.0283865	0.0211038	0.0285333	0.0226822	0.0275927	0.0284033	0.0262288	0.0241488	0.0240248	0.0208275	0.0118006	0.0312578
axo00925-f_at	5.22523	5.5727	5.35175	5.25764	4.89616	5.11277	5.13581	4.92081	4.89103	4.84791	4.98633	4.73075	4.93164	4.89712	4.45778	4.44914	4.33676	4.39765	4.25849	4.17621	0.0877863	0.159048	0.0864911	0.101644	0.0681671	0.0933643	0.119818	0.0659655	0.0918412	0.112255	0.0942407	0.0792841	0.10085	0.0802654	0.0727668	0.0801443	0.0552782	0.0401275	0.0377587	0.0892675
axo00926-f_at	6.57305	6.55941	6.47351	6.72419	6.71654	7.2914	7.13112	6.86684	6.83751	6.79195	6.88345	6.82052	6.72771	6.64121	6.57318	6.64056	6.61833	6.61023	6.34482	6.43337	0.0472917	0.0349623	0.0564265	0.0429717	0.0481566	0.0354872	0.0382664	0.0313168	0.0440012	0.0451963	0.031609	0.0367932	0.0721679	0.024877	0.0384466	0.05216	0.069193	0.0414596	0.0500497	0.0656334
axo00927-f_at	3.80197	3.81397	3.78221	3.78925	3.79546	3.74319	3.75291	3.65685	3.72067	3.70023	3.75566	3.82653	3.75097	3.89822	3.64797	3.68239	3.6561	3.74075	3.75742	3.81204	0.0408303	0.046968	0.0457941	0.0345912	0.0280879	0.0326597	0.0325048	0.0481112	0.030518	0.0539559	0.0308328	0.0390733	0.0470441	0.053496	0.029033	0.0279625	0.044243	0.0496023	0.0468333	0.0407196
axo00928-r_at	3.75071	3.76564	3.77402	3.90097	3.77108	3.69011	3.64441	3.75269	3.65538	3.72816	3.73081	3.72649	3.67116	3.6709	3.7277	3.6943	3.7212	3.66818	3.71841	3.6017	0.0478585	0.0514566	0.0397807	0.0751657	0.0409983	0.0495726	0.0435959	0.0561027	0.0533314	0.0529029	0.0596201	0.0421917	0.0403746	0.0607961	0.0468982	0.0145786	0.0437119	0.0332969	0.0364418	0.0404802
axo00929-f_at	5.79595	5.61695	5.51112	5.7135	5.52083	5.55652	5.60534	5.5827	5.60243	5.49763	5.49183	5.48576	5.40914	5.53113	5.67904	5.61185	5.70372	5.41149	5.49578	5.61081	0.0591358	0.063006	0.0611279	0.0577577	0.0411541	0.0198822	0.0325509	0.0216449	0.0310812	0.0346782	0.0276423	0.0291825	0.035705	0.0272759	0.0319376	0.0268915	0.0345888	0.0463791	0.0370816	0.0187735
axo00930-r_at	3.92299	3.86674	3.93465	4.01548	3.99053	3.90714	3.90346	3.93136	3.94305	3.98736	3.94724	3.96631	3.89716	3.85457	3.86545	3.85316	3.75755	3.77271	3.84532	3.89443	0.0351866	0.0337934	0.061382	0.0460017	0.0345225	0.0489419	0.0282759	0.0496062	0.033617	0.0275435	0.0394941	0.0317464	0.0424681	0.0286839	0.0599842	0.0438841	0.0276538	0.0317272	0.0433755	0.0361462
axo00931-r_at	7.68574	7.52906	7.54568	7.83366	8.04953	8.20248	8.13484	8.19614	7.91826	8.00393	7.82276	8.06366	7.95343	7.92672	8.07385	7.88961	8.06558	8.26523	8.15849	7.92456	0.0209527	0.0428371	0.0309898	0.0308087	0.0270575	0.0262381	0.0264418	0.0314635	0.0288213	0.0330153	0.0299448	0.0211903	0.0287608	0.0357427	0.0225559	0.0263739	0.023775	0.0324161	0.0220575	0.0245858
axo00932-r_at	3.46286	3.39942	3.42721	3.52788	3.47578	3.44192	3.44357	3.44126	3.47189	3.56356	3.44307	3.46393	3.45405	3.49765	3.51806	3.45241	3.52166	3.51832	3.52205	3.52471	0.0220475	0.0472938	0.0344881	0.041675	0.0367974	0.028382	0.0328446	0.0295027	0.0494366	0.0339932	0.0423719	0.0306839	0.0437708	0.0251481	0.0281225	0.0426014	0.0542892	0.0281636	0.0430033	0.0403071
axo00933-f_at	4.54472	4.52169	4.55955	4.58962	4.57426	4.55123	4.44813	4.41731	4.56353	4.61627	4.50006	4.60876	4.52655	4.40922	4.59306	4.44012	4.4349	4.39997	4.47525	4.37762	0.0208913	0.0284243	0.0310146	0.0380906	0.038945	0.0389238	0.0383097	0.0371738	0.0256623	0.052915	0.031026	0.0403921	0.03883	0.0413483	0.0395077	0.0348309	0.0377569	0.026118	0.0402795	0.0322365
axo00934-f_at	8.64302	8.65746	8.5631	8.5319	8.2652	8.03692	8.0169	8.0145	8.14517	8.0408	8.10791	8.13452	8.1626	8.34556	8.35394	8.43631	8.47939	8.33438	8.37133	8.33658	0.0292531	0.02095	0.0269576	0.0264265	0.0269138	0.0266144	0.017063	0.0260951	0.0236152	0.0182391	0.0254005	0.0145674	0.0223487	0.0192678	0.00770796	0.0196589	0.016459	0.0182232	0.0140152	0.015663
axo00935-f_at	7.81458	7.82476	8.0411	8.183	8.18604	8.11392	7.84262	7.84294	7.75704	7.85161	7.76467	7.77861	7.66448	7.85552	7.86943	7.83169	7.88494	7.85804	7.86955	7.89669	0.0298877	0.0333262	0.04621	0.05729	0.0444648	0.0513987	0.0447708	0.0425981	0.0383837	0.0412693	0.0283746	0.0208359	0.0206199	0.042058	0.0402536	0.0419409	0.0222767	0.0176397	0.0128354	0.0262844
axo00936-f_at	6.20514	5.85334	5.4967	5.84283	5.6894	6.00655	6.03947	5.85971	5.77686	5.73802	6.94797	6.77669	6.39	6.22102	5.95255	6.51169	6.43278	6.35548	6.17911	5.66201	0.0761828	0.0888736	0.129507	0.0714935	0.0674126	0.1749	0.165529	0.18409	0.191872	0.186813	0.0438262	0.0428874	0.0441948	0.0594083	0.0658695	0.0547123	0.085705	0.0896113	0.0889512	0.12988
axo00937-f_at	12.9502	12.8858	12.8052	12.7828	12.7059	12.7798	12.8536	12.8615	12.8187	12.7346	12.7359	12.718	12.7723	12.7436	12.8249	12.8343	12.9173	12.8663	12.8427	12.7644	0.00738295	0.00602292	0.00799035	0.008852	0.0114533	0.00667011	0.00769659	0.00779398	0.0110484	0.00844462	0.00952254	0.00851237	0.00434464	0.0103597	0.00843415	0.0107843	0.00731107	0.00940605	0.00718411	0.00953257
axo00939-f_at	6.89247	6.65848	6.36806	6.78673	6.69505	7.10805	6.78483	6.7347	7.05511	6.94374	7.34115	7.1197	6.925	6.77843	6.52622	7.22903	7.15603	6.81261	6.75411	6.46491	0.0910028	0.100084	0.131614	0.0767712	0.07835	0.0759279	0.0778489	0.0855619	0.0527977	0.0495675	0.0487715	0.0419425	0.0404673	0.0138661	0.0303894	0.0420032	0.0732705	0.0734848	0.0450774	0.0817981
axo00941-f_at	6.37541	6.68991	6.24989	6.62808	6.52561	6.6973	6.60845	6.37468	6.48882	6.48962	6.57744	6.48605	6.59732	6.52572	6.36909	6.69602	6.56791	6.50317	6.39353	6.36952	0.0420591	0.0533958	0.0716203	0.0312861	0.0338671	0.0523859	0.0335721	0.0379947	0.0385627	0.0464837	0.0312016	0.0401911	0.0457916	0.0415207	0.0368345	0.0351238	0.0302652	0.0371143	0.0377946	0.0301627
axo00943-f_at	8.87647	8.72589	8.62401	8.75539	8.88212	9.01561	9.01542	9.07665	9.08964	8.98123	8.97262	8.98124	9.09134	9.08709	9.08392	9.10644	9.14981	9.03055	9.08409	9.03749	0.0153131	0.0201781	0.0202268	0.0194092	0.0154467	0.0129271	0.0058626	0.013857	0.010716	0.0181888	0.00800933	0.0100045	0.0157918	0.0160682	0.0123767	0.010742	0.0127478	0.0202167	0.0111833	0.014557
axo00944-f_at	4.02329	4.11389	4.08371	3.93942	3.98776	4.04507	3.9735	3.94418	3.94148	3.98734	3.98811	3.97016	3.98125	4.04495	4.07509	4.04122	3.97799	3.99196	3.99981	4.09383	0.0422425	0.04125	0.0514823	0.0341319	0.0503131	0.0451731	0.0464971	0.054483	0.0415042	0.0358791	0.0299989	0.0384246	0.0287805	0.0382956	0.0511775	0.0335747	0.0413057	0.0369341	0.0226013	0.0646148
axo00945-f_at	7.54581	7.46738	7.4741	7.50326	7.60451	7.59784	7.70215	7.65129	7.53832	7.48592	7.40443	7.49192	7.50809	7.6505	7.63184	7.70846	7.63082	7.60936	7.55278	7.52785	0.0211429	0.0249909	0.0243112	0.0253309	0.0198119	0.0228932	0.0186537	0.0341855	0.0327197	0.0306111	0.0315415	0.0214531	0.0124276	0.0201734	0.019424	0.0188378	0.0211415	0.0197325	0.0192406	0.0227792
axo00946-f_at	5.89211	6.02762	5.99597	6.57537	6.48416	7.16141	7.15299	7.00249	6.75482	7.00518	6.70788	6.64176	6.50972	6.4346	5.86809	6.60699	6.33097	6.36182	6.05618	6.00746	0.0635184	0.075576	0.071822	0.0375594	0.0270101	0.033308	0.0523698	0.087164	0.0507265	0.0458348	0.0883495	0.0901653	0.0603043	0.0392111	0.0920641	0.0520927	0.0584348	0.0615395	0.0468112	0.0636084
axo00947-f_at	4.55117	5.29417	6.30177	5.72804	5.44872	5.11366	5.05175	5.06914	5.08291	5.38133	5.32841	5.3108	5.28718	5.1551	5.24908	5.06508	4.91782	5.15606	5.09167	5.14187	0.0567875	0.0739676	0.0770102	0.0625364	0.0880116	0.0778691	0.0465353	0.0613596	0.0705638	0.0573384	0.0621721	0.0672175	0.0803537	0.0460239	0.0428295	0.0594824	0.0532958	0.0376164	0.0501702	0.0733866
axo00948-f_at	5.04063	5.03763	5.18147	5.12515	5.07557	5.12274	5.07704	5.0207	5.07586	5.02356	5.09269	4.98343	5.12854	5.09445	4.98915	5.02587	5.01389	5.09936	5.12274	5.10735	0.039042	0.0397902	0.0287189	0.0324558	0.0278771	0.0190672	0.0270516	0.02068	0.0186985	0.018165	0.0334765	0.0268827	0.0186253	0.0152382	0.0222867	0.0278945	0.035393	0.028224	0.0275086	0.0287949
axo00949-r_at	9.41947	9.26384	9.0855	9.03948	9.04829	8.96629	8.85593	8.83549	8.78895	8.83912	8.60907	8.68264	8.64492	8.50396	8.50538	8.49959	8.51226	8.52608	8.59592	8.50764	0.0177287	0.025519	0.0268976	0.0179344	0.0118662	0.0230238	0.0310582	0.0244276	0.0197515	0.0266769	0.0288589	0.0351093	0.0360825	0.0370686	0.0163663	0.0312985	0.0194499	0.0198049	0.0273081	0.0288426
axo00950-f_at	4.94708	4.90371	4.8112	4.82005	4.85005	4.79797	4.72059	4.67751	4.73526	4.75431	4.93277	4.80737	4.64992	4.71199	4.67895	4.7444	4.71399	4.69815	4.70712	4.68528	0.0292612	0.0390091	0.0354821	0.033786	0.035864	0.030454	0.0353356	0.0375217	0.0376098	0.0404831	0.0350584	0.0406975	0.0358345	0.0294607	0.0212112	0.0518521	0.0530401	0.0281864	0.045153	0.0420908
axo00951-r_at	8.237	8.08775	8.13037	8.22614	8.41517	8.61219	8.70442	8.73128	8.50913	8.41217	8.42976	8.43637	8.63986	8.64366	8.63313	8.7503	8.69632	8.72702	8.72247	8.5253	0.0282755	0.0311555	0.0278606	0.0168153	0.0178649	0.0166837	0.0188414	0.0123157	0.0230003	0.020053	0.0219437	0.0125237	0.0138122	0.0301185	0.0224467	0.0232832	0.022128	0.0255527	0.00769911	0.0101533
axo00957-f_at	9.57384	9.58946	9.58483	9.64025	9.68579	9.88007	10.019	10.0284	9.93338	9.9164	9.99175	10.0406	9.93954	9.91945	10.0002	10.0587	9.9827	10.0975	10.029	10.1747	0.0211981	0.0189302	0.0239118	0.0174291	0.0210017	0.0116237	0.0163697	0.00914063	0.0244637	0.0162096	0.0232064	0.0217245	0.012026	0.0182432	0.0185498	0.0171727	0.0131838	0.0155497	0.0132787	0.0101965
axo00959-f_at	6.30072	6.37543	6.04604	6.3363	6.06702	6.15404	5.97145	6.07552	6.19747	6.18244	6.09125	6.13749	5.71283	5.54696	5.35108	5.80103	5.8485	5.99931	5.50603	5.46159	0.12403	0.0798303	0.0871284	0.0440992	0.0453541	0.0627509	0.0638656	0.0597909	0.0759156	0.033199	0.0513402	0.0484641	0.0488642	0.0425048	0.0817269	0.0749688	0.0678163	0.0534969	0.0450938	0.0528473
axo00961-f_at	8.44181	8.21164	8.17247	8.27454	8.3417	8.28868	8.36797	8.478	8.54857	8.49586	8.4623	8.58057	8.53792	8.5979	8.66788	8.64454	8.76413	8.6439	8.64383	8.60142	0.0231973	0.0239748	0.0191744	0.0226706	0.024357	0.0205799	0.0245822	0.0169584	0.0153517	0.0113138	0.0103632	0.0107351	0.0188226	0.0134446	0.016005	0.0186157	0.0152116	0.0121575	0.0176871	0.0131413
axo00962-f_at	4.9902	5.05458	5.05119	4.99387	5.12004	5.26012	5.2043	5.14585	5.17859	5.27492	5.21227	5.22281	5.36851	5.32238	5.32455	5.10445	5.21914	5.09952	5.24308	5.37504	0.0638736	0.0590467	0.0515805	0.0424445	0.0466913	0.042089	0.0502238	0.0393565	0.0519298	0.0506693	0.022593	0.0234789	0.0448642	0.0408136	0.032896	0.056296	0.0630786	0.0450778	0.0293241	0.040245
axo00963-f_at	3.50012	3.36899	3.4207	3.40106	3.34339	3.33814	3.26827	3.33622	3.32754	3.29635	3.33689	3.3481	3.32696	3.38132	3.46694	3.48805	3.39652	3.47555	3.39421	3.40121	0.0407628	0.0341502	0.0365307	0.0340615	0.043939	0.0321868	0.0280093	0.0313638	0.0344614	0.0343749	0.0342686	0.0255952	0.0177575	0.0341923	0.0366489	0.0673473	0.0516026	0.0521842	0.0343382	0.0395175
axo00964-f_at	6.11257	6.29702	6.50875	6.71183	6.89087	7.1166	7.03928	7.03386	7.12663	7.20044	7.1954	7.12115	7.07051	6.94982	6.84362	6.70275	6.68062	6.98194	6.87448	6.72216	0.0391293	0.0378989	0.0569967	0.0322584	0.0322724	0.0413822	0.0457062	0.033892	0.0351549	0.0384206	0.0343788	0.0185208	0.042927	0.0336299	0.0282638	0.030939	0.0292439	0.03929	0.0349278	0.0618852
axo00965-f_at	4.43907	4.71383	4.78527	4.63097	4.57201	4.51339	4.56449	4.54027	4.52569	4.5796	4.53112	4.61457	4.54225	4.58031	4.66268	4.57346	4.58239	4.60202	4.60793	4.59448	0.0294273	0.0372788	0.0366931	0.0443307	0.0281319	0.0356365	0.0247931	0.02261	0.0289849	0.0407343	0.0233352	0.0277516	0.033987	0.0404723	0.0271601	0.0424343	0.013405	0.0323631	0.0121935	0.0387977
axo00966-f_at	5.98634	5.46377	5.1377	5.24784	5.10724	5.23599	5.07947	4.90529	4.82289	4.58757	4.73483	4.716	4.62752	4.61026	4.46494	4.6205	4.60246	4.56373	4.47242	4.49866	0.105612	0.0877832	0.130902	0.0615815	0.061481	0.0610513	0.0967988	0.0626739	0.037531	0.0465477	0.0419241	0.069227	0.0311287	0.0331495	0.0257518	0.044708	0.0517952	0.0387788	0.0316143	0.0424907
axo00967-r_at	6.54198	6.01671	5.51232	5.53789	5.4019	5.75553	5.62827	5.44091	5.19281	5.03975	5.04654	5.02918	4.95015	4.94996	4.83426	5.04705	5.0335	4.89541	4.63219	4.73061	0.140032	0.122658	0.148618	0.0979505	0.0800013	0.108072	0.0883372	0.0936381	0.056214	0.0558964	0.0423767	0.0744954	0.0450119	0.0535034	0.061089	0.0408529	0.0643633	0.0365508	0.02861	0.0416422
axo00968-f_at	11.0607	10.4908	10.4048	10.0945	10.151	10.1935	10.0707	10.0195	9.74923	9.60285	9.35579	9.36621	9.2691	9.14877	9.12729	9.07256	9.11469	9.02123	8.82188	8.88192	0.0277802	0.0445366	0.0515906	0.0478577	0.0291542	0.0268382	0.0277799	0.0295682	0.0353786	0.0385581	0.023259	0.040399	0.0156646	0.0318905	0.0232122	0.0229264	0.0224153	0.0240276	0.0265854	0.0308582
axo00969-f_at	7.42795	7.82403	7.51951	7.21106	7.11594	7.24295	7.65435	7.63317	7.88792	7.07501	6.50153	6.68121	7.12948	7.1715	7.13025	6.68547	6.83587	6.91849	6.94061	7.20295	0.0731015	0.0910657	0.0658382	0.0363821	0.053636	0.0643329	0.0465442	0.0697949	0.0557753	0.0441941	0.0985452	0.0979355	0.0403697	0.0599298	0.0394509	0.1012	0.0912419	0.0730601	0.0512909	0.0753969
axo00972-f_at	14.4321	14.4047	14.4141	14.4187	14.4252	14.3954	14.3961	14.3958	14.3664	14.3725	14.3622	14.3411	14.3724	14.3633	14.3653	14.3908	14.4195	14.3811	14.3795	14.3828	0.00241089	0.00183401	0.00423435	0.00257462	0.00293783	0.00225658	0.00364906	0.00231682	0.00517926	0.00439223	0.00329788	0.0032372	0.00328122	0.0033027	0.0028872	0.00321556	0.00302419	0.00250907	0.00209078	0.00385703
axo00973-f_at	4.027	4.30227	4.24375	4.5001	4.40604	4.51558	4.38969	4.31728	4.21239	4.48702	4.4466	4.36014	4.27521	4.2294	4.26652	4.30186	4.37633	4.21261	4.29941	4.12912	0.0539195	0.0320156	0.0371257	0.0779691	0.0564862	0.0772544	0.0811356	0.0636406	0.0550036	0.059649	0.031557	0.0800435	0.0667606	0.0303966	0.0525668	0.0639508	0.0622698	0.0537203	0.04901	0.0271861
axo00975-f_at	7.2269	7.23601	7.46585	7.06868	7.17526	7.04753	7.87537	8.40573	8.61055	8.33311	8.31453	8.14586	8.49239	8.63345	8.75586	8.75706	8.79742	8.62167	8.75914	8.60879	0.0652185	0.0807783	0.0947318	0.0963326	0.0841099	0.0637874	0.0522017	0.033757	0.0138331	0.031788	0.0276401	0.0308773	0.0200058	0.0235927	0.0183152	0.0317155	0.0238168	0.0311323	0.017233	0.01957
axo00976-r_at	9.14704	8.97818	9.02072	9.1554	9.22621	9.33395	9.5615	9.83105	9.56461	9.31868	9.28171	9.23151	9.36952	9.31786	9.28679	9.22368	9.17277	9.40723	9.30984	9.17085	0.0146607	0.0233145	0.0322752	0.0183988	0.0194433	0.0182217	0.0239228	0.0195063	0.0380697	0.0232053	0.0289035	0.0143132	0.0168489	0.0200826	0.0214118	0.0133206	0.020205	0.020275	0.0178319	0.0217811
axo00977-r_at	7.06172	6.65137	5.97288	6.1573	6.72938	6.88408	6.91655	6.83736	7.16027	6.86629	7.03962	7.01575	7.2405	7.17677	7.18708	7.39545	7.23492	7.0553	7.17504	7.27031	0.0505238	0.0315651	0.035138	0.0554049	0.0454063	0.0362706	0.0434809	0.0545006	0.0539793	0.0327344	0.0240064	0.0332418	0.0398314	0.0362945	0.023911	0.0212248	0.0134742	0.0321141	0.027379	0.0226624
axo00978-r_at	6.09334	6.35495	6.60493	7.40287	7.07593	7.59601	7.5832	7.38328	7.21538	8.13305	8.11745	8.20663	7.23942	7.15881	7.52832	7.43288	7.08708	7.56261	7.3447	7.51383	0.0702636	0.0741321	0.118846	0.113223	0.111502	0.0780739	0.110886	0.147395	0.102731	0.0783002	0.103898	0.0819604	0.0866521	0.104125	0.074183	0.0904346	0.105737	0.0936516	0.0847669	0.12588
axo00979-f_at	8.22684	8.19101	8.55929	8.76425	8.77288	8.6548	8.67918	8.58976	8.51971	8.58531	8.45765	8.60645	8.68971	8.76475	8.84778	8.84636	8.84975	8.88406	8.86749	8.74127	0.0316587	0.0380507	0.0194626	0.0161804	0.0209083	0.0152753	0.0158215	0.0206091	0.0205245	0.0183022	0.0224494	0.0140465	0.0239616	0.0166683	0.012625	0.0304912	0.0106073	0.01934	0.0128074	0.022812
axo00980-f_at	10.4411	10.1308	10.2537	10.2377	10.292	10.1234	10.3663	10.4865	10.3764	10.3336	10.5016	10.4102	10.5964	10.6296	10.4609	10.5811	10.7557	10.7471	10.7724	10.7673	0.0287136	0.051796	0.0356314	0.0332341	0.0122149	0.0395953	0.0191932	0.0193902	0.0326772	0.0314688	0.0132197	0.0374885	0.0185307	0.014903	0.0481909	0.0308753	0.00761159	0.026067	0.0364596	0.0160819
axo00981-f_at	3.65271	3.70166	3.76231	3.8071	3.64097	3.70822	3.76396	3.76634	3.75563	3.8915	3.95571	3.9091	3.93382	3.78403	3.7769	3.80328	3.74836	3.90402	3.77169	3.76908	0.0444818	0.0363377	0.0523305	0.0449294	0.0507419	0.0488543	0.0360172	0.0553839	0.0408189	0.0417006	0.0258888	0.0458324	0.0364182	0.0427992	0.0445787	0.0441332	0.0511278	0.0325732	0.0548464	0.0400854
axo00983-f_at	4.15057	4.18239	4.12691	4.32071	4.21612	4.19087	4.22926	4.25512	4.20564	4.17787	4.25855	4.12442	4.17145	4.26901	4.17901	4.11058	4.15999	4.19717	4.20185	4.18825	0.0284368	0.0471998	0.0570053	0.0386841	0.0245532	0.0264643	0.0498511	0.0328696	0.0430546	0.0398108	0.0266667	0.0411677	0.0500655	0.04283	0.0377906	0.0557803	0.0289182	0.0398079	0.0305397	0.0352413
axo00984-f_at	8.40488	8.62551	8.58507	8.54725	8.30223	8.30642	8.55898	8.59532	8.82684	8.8409	8.9499	8.84325	8.98307	8.98553	8.8973	8.85806	8.89253	8.87282	9.05593	8.9332	0.0242994	0.0342669	0.0536802	0.0211855	0.0200758	0.024169	0.0181918	0.0332702	0.0263333	0.0360947	0.025537	0.0234925	0.0275299	0.0187856	0.0259968	0.035197	0.0218666	0.0278482	0.0175935	0.0120011
axo00986-f_at	10.6515	10.0011	9.53614	9.40403	9.33263	9.23366	9.01688	8.92415	8.73222	8.0036	7.27484	7.19511	6.95776	6.41536	6.33593	6.2518	6.49699	6.33287	6.45874	6.51758	0.0170438	0.0630024	0.0567925	0.0523557	0.0479113	0.0498229	0.0418454	0.0646304	0.0618299	0.0943844	0.0769625	0.137293	0.0904672	0.0578067	0.0395421	0.0802747	0.0539498	0.0506488	0.0830028	0.0347429
axo00987-f_at	8.82701	8.03176	7.46049	7.38482	7.20088	7.52922	7.30987	7.24442	6.82303	5.97216	5.4327	5.40175	5.07974	4.61724	4.62298	4.72168	4.98489	4.76064	4.76006	4.81258	0.0661615	0.0982273	0.109302	0.115613	0.112228	0.0589801	0.0659698	0.0964928	0.102965	0.155554	0.0755452	0.182617	0.125097	0.0592485	0.0363822	0.0617568	0.048041	0.0373133	0.0789153	0.0698183
axo00990-r_at	5.57094	5.93629	5.93802	6.22987	6.54739	7.33207	7.34468	7.11896	7.12671	7.21045	7.22954	7.15498	6.97254	6.71902	6.68713	6.44754	6.30972	6.16362	6.09053	6.21514	0.0889773	0.135363	0.0799537	0.103812	0.119593	0.0721574	0.0467449	0.0534982	0.0880016	0.0526409	0.0407554	0.066251	0.101827	0.0643422	0.0492199	0.0765643	0.0716333	0.0689787	0.0722732	0.0911396
axo00992-f_at	7.66148	7.76176	7.96274	8.14022	8.28017	8.54366	8.45457	8.39015	8.37367	8.38554	8.28394	8.19069	8.3282	8.17186	8.34856	8.37205	8.43709	8.39619	8.27797	8.39704	0.0115642	0.0390483	0.0270108	0.0252884	0.0201027	0.0285109	0.0318719	0.035712	0.0252799	0.0347332	0.0142054	0.0238951	0.0382928	0.0212399	0.0194131	0.0232006	0.02313	0.0200689	0.0127678	0.0133668
axo00993-r_at	7.43463	6.81406	6.28813	5.76302	6.21391	5.97607	5.87523	6.19163	5.77425	5.68897	5.52166	5.51648	5.77837	5.52751	6.38542	5.89876	6.66221	6.45861	6.17737	5.93799	0.0841096	0.103748	0.102557	0.0567202	0.0977187	0.124974	0.119199	0.108262	0.143341	0.0954417	0.113879	0.147896	0.108333	0.118082	0.18423	0.194751	0.1556	0.149411	0.114008	0.0725975
axo00994-f_at	9.24984	9.05976	9.13613	9.09008	9.18576	9.33423	9.33927	9.51019	9.47998	9.44986	9.3404	9.38474	9.39675	9.33997	9.31564	9.33137	9.39192	9.61682	9.45197	9.44375	0.0227743	0.0146436	0.0160283	0.016061	0.0123063	0.0126345	0.00983343	0.0116059	0.00898292	0.0153502	0.0166456	0.016304	0.0134566	0.0117584	0.00960173	0.011801	0.0170895	0.0145206	0.0187973	0.0180906
axo00995-f_at	8.08831	8.0056	8.32766	8.1762	8.22571	8.71891	8.74444	9.18171	9.64675	9.72121	9.75285	9.48214	8.94016	8.01372	7.34634	7.22732	7.2047	6.87739	6.34189	6.9318	0.0504393	0.0579609	0.082046	0.0613301	0.0464416	0.042251	0.0450032	0.0473777	0.0552988	0.084449	0.0558087	0.0876672	0.155044	0.120722	0.0707341	0.129488	0.0470282	0.100799	0.0868601	0.059004
axo00996-r_at	3.4925	3.44703	3.53131	3.56117	3.55495	3.53662	3.58319	3.615	3.53034	3.52413	3.51579	3.54185	3.61523	3.60018	3.55738	3.54712	3.57718	3.61694	3.59907	3.63308	0.0396116	0.0244609	0.0303713	0.0278544	0.0250962	0.028358	0.0564238	0.0398432	0.0312101	0.0299119	0.0570089	0.0429144	0.0353037	0.0351327	0.0349978	0.032983	0.0503398	0.0547337	0.0527777	0.0401053
axo00997-r_at	3.81383	3.86388	3.81362	3.76962	3.7053	3.63437	3.65851	3.61211	3.57031	3.57007	3.60239	3.61039	3.59414	3.62704	3.48812	3.59	3.49478	3.61558	3.60043	3.54467	0.0544217	0.0290422	0.0610725	0.0359811	0.0527831	0.0298727	0.0408091	0.0433681	0.0352232	0.0447736	0.034519	0.0306179	0.0439241	0.0448726	0.0212196	0.0459562	0.0306561	0.0979271	0.0358594	0.0368248
axo00998-f_at	6.18957	6.28146	6.17777	6.34759	6.27845	6.1468	5.82948	5.94779	5.78886	6.27345	6.02145	6.05168	6.22349	6.25362	6.44377	6.42922	6.6524	6.31582	6.73283	6.4064	0.0804269	0.084842	0.0968037	0.0749636	0.0801166	0.103082	0.0759814	0.0612989	0.0741985	0.0713956	0.0702096	0.0757356	0.0758123	0.0633535	0.0828876	0.098365	0.0575835	0.0954731	0.0686962	0.0878065
axo00999-f_at	6.28297	6.37406	6.38209	6.53253	6.37501	6.43556	6.1977	6.18736	6.16041	6.48215	6.31959	6.34464	6.5136	6.4576	6.5876	6.49277	6.54401	6.3846	6.74847	6.58092	0.063657	0.052583	0.0608294	0.0622891	0.0587467	0.0872005	0.065275	0.0579402	0.0425121	0.0634286	0.0612369	0.0454347	0.0508891	0.0582298	0.0593043	0.0712109	0.0509618	0.0611697	0.0559105	0.0677285
axo01000-f_at	3.24859	3.27861	3.35562	3.40139	3.38075	3.32748	3.36846	3.25717	3.3244	3.38206	3.41026	3.35323	3.29783	3.34	3.31963	3.35764	3.34151	3.31459	3.23736	3.26161	0.032406	0.0580733	0.0400039	0.033121	0.0266369	0.028981	0.0239074	0.0360302	0.0339751	0.0420915	0.0380787	0.0330499	0.0579407	0.0600717	0.0367531	0.0534134	0.0275617	0.0218884	0.0373988	0.0483961
axo01001-f_at	3.90192	3.80095	3.81875	4.00171	3.82968	3.94473	3.82271	3.90855	3.89712	3.91804	3.9588	3.94599	3.87443	3.84411	3.8364	3.92009	3.9151	3.87356	3.92387	3.88533	0.0414568	0.0499212	0.0310344	0.0450163	0.0292951	0.0478543	0.0407452	0.0446896	0.0376511	0.0454874	0.0376232	0.0415956	0.0526101	0.0498884	0.0367773	0.0484219	0.02347	0.036614	0.0344178	0.0322569
axo01002-r_at	3.44817	3.48453	3.53018	3.45915	3.48193	3.43714	3.44712	3.45019	3.49521	3.50248	3.48854	3.47069	3.55432	3.48917	3.49994	3.48915	3.45516	3.49165	3.5136	3.39975	0.048274	0.0360178	0.0370065	0.0263281	0.0521009	0.0330381	0.0370055	0.0428824	0.019542	0.0263088	0.0323522	0.0252845	0.0403175	0.0297768	0.0448755	0.03325	0.0455072	0.0471717	0.0432391	0.0502954
axo01003-f_at	8.61532	8.29109	8.56453	8.63363	8.94349	8.79964	8.95059	8.97495	8.82371	8.99567	8.85012	8.95736	8.77908	8.81305	9.01726	9.00531	9.14572	9.21274	9.01115	8.95035	0.0281698	0.0349993	0.0177354	0.0309636	0.018718	0.0330832	0.0137305	0.0197302	0.0274741	0.022132	0.018275	0.0321259	0.0331696	0.0313661	0.013267	0.0371079	0.0152698	0.0168218	0.0277912	0.0251893
axo01004-r_at	7.7271	7.34249	7.24895	7.23219	7.2198	7.10972	7.05681	7.18161	7.30123	7.39448	7.36151	7.49884	7.42529	7.38041	7.45287	7.42724	7.55826	7.61603	7.63177	7.66806	0.0219202	0.0209106	0.0322131	0.0508956	0.0397442	0.0360934	0.0356067	0.0301358	0.0294116	0.0128733	0.0159354	0.0298726	0.025157	0.021947	0.0164998	0.0156155	0.0183894	0.0191608	0.0210092	0.0254294
axo01005-f_at	7.70233	7.50628	7.88343	7.7939	7.98068	7.3644	7.15562	7.38733	7.85247	7.38522	7.58739	7.65597	7.60977	7.35506	7.64428	7.84019	6.79804	6.96623	6.927	6.93025	0.0513298	0.0946996	0.0458371	0.0671918	0.0740586	0.165829	0.183905	0.0933628	0.0561983	0.165736	0.0904786	0.0709555	0.0926051	0.0924668	0.0604119	0.0578886	0.244657	0.0820942	0.163008	0.243508
axo01006-f_at	7.50854	7.3468	7.41622	7.34615	7.30969	7.58748	7.83719	7.94356	7.99045	7.88215	7.92985	7.68791	8.01574	8.10262	8.11785	7.9528	8.13915	8.14535	8.15907	8.26031	0.0381343	0.0523797	0.0602444	0.0450223	0.027237	0.0321733	0.0221035	0.031231	0.0411111	0.0408776	0.0364722	0.0335647	0.0262981	0.0286376	0.0322349	0.0520601	0.0421321	0.0150041	0.0350922	0.0343134
axo01009-f_at	8.78333	8.82505	8.71845	8.62723	8.89494	9.05388	9.09063	9.06002	9.06041	9.00602	9.02096	9.02281	9.24744	9.19483	9.24686	9.13629	9.13581	9.20332	9.18861	9.14298	0.0208221	0.026711	0.0328106	0.0356893	0.0230423	0.0265117	0.0157275	0.0191327	0.0197869	0.0205767	0.0171669	0.0161268	0.021251	0.0205408	0.0206	0.0148839	0.0160911	0.0162398	0.0198827	0.0157722
axo01010-r_at	8.93891	8.61618	8.84997	8.92974	9.03166	9.25616	9.36692	9.45949	9.42193	9.39523	9.29059	9.29395	9.4106	9.35955	9.35435	9.45166	9.56109	9.59317	9.51784	9.28602	0.0329263	0.0445184	0.0353247	0.0340279	0.0159907	0.0200565	0.0194943	0.015822	0.0270358	0.013794	0.0161718	0.0225872	0.0105484	0.0127558	0.0126078	0.0181541	0.0074347	0.0128623	0.0143317	0.0167114
axo01011-f_at	8.17978	7.84623	7.926	8.07056	8.16537	7.92944	7.97583	8.04625	8.02722	8.14333	8.12865	8.1156	8.16707	8.0135	8.09041	8.16221	8.20452	8.19684	8.05255	8.11686	0.0151881	0.0342102	0.0211952	0.0159423	0.0149541	0.0225543	0.0108894	0.0167615	0.0134534	0.0338697	0.022221	0.0159953	0.0140478	0.0330231	0.020899	0.0157958	0.00763148	0.025791	0.0176658	0.0149188
axo01012-f_at	3.84064	3.80426	4.16637	3.94676	4.03007	3.9754	3.98873	3.98527	3.96128	3.99525	3.92724	3.84159	3.95537	3.88547	3.88153	3.8945	3.88645	3.89871	3.85538	3.88667	0.0465436	0.0433899	0.174654	0.0560901	0.0488441	0.0442046	0.0409199	0.0517551	0.0428281	0.0224606	0.0405238	0.0499617	0.0350592	0.0357316	0.0369457	0.0332606	0.0236408	0.0422714	0.0546016	0.0373228
axo01014-f_at	3.52716	3.676	3.60114	3.64346	3.57701	3.56933	3.55776	3.56491	3.50876	3.60782	3.66108	3.62964	3.56135	3.64807	3.70632	3.50497	3.68947	3.64801	3.64096	3.62822	0.0453133	0.0511486	0.0466542	0.0279801	0.0382534	0.0316284	0.0360126	0.0282507	0.056744	0.0493739	0.0324187	0.0446294	0.0510888	0.0441179	0.0353243	0.0280789	0.0266975	0.0254892	0.0345441	0.034107
axo01017-f_at	7.51986	7.60124	8.3058	8.17727	8.05817	7.91697	7.81446	7.81563	7.84115	7.77432	7.90622	7.95256	7.82252	7.75921	7.74639	7.76993	7.80574	7.6226	7.57685	7.65682	0.0245571	0.0293902	0.0821745	0.0771009	0.0487323	0.0430974	0.0247491	0.035675	0.0454047	0.0417542	0.0543387	0.0348175	0.0320578	0.0181391	0.0301906	0.0199096	0.0221797	0.0176981	0.00831934	0.0202524
axo01020-r_at	5.64905	5.5964	5.55062	5.69001	5.78535	6.65298	6.51549	6.64536	6.65766	6.84947	6.87708	6.93652	6.79825	6.83516	6.67342	6.45604	6.398	6.67387	6.59046	6.46441	0.102115	0.121495	0.128044	0.138677	0.149809	0.0603919	0.0562445	0.0608043	0.0482343	0.0645655	0.0730777	0.0579167	0.0785632	0.081576	0.06096	0.0940049	0.0813359	0.0775394	0.0795273	0.0981848
axo01022-f_at	7.59059	7.33008	7.20477	7.07422	7.14276	7.32828	7.53111	7.96117	8.01144	8.09928	7.84603	7.80752	8.10217	7.99515	8.42126	8.09523	8.2274	8.33861	8.10773	8.12641	0.0808192	0.0711999	0.100658	0.0446766	0.0832555	0.0480783	0.0472602	0.0383464	0.0432518	0.0488469	0.0562064	0.0708954	0.0550057	0.0466478	0.0385019	0.0629764	0.0375875	0.0307519	0.0611773	0.0452752
axo01023-f_at	5.60129	5.1631	5.29505	5.11934	5.49124	5.19546	5.18925	5.20961	5.22701	5.0919	4.97848	4.99322	5.20435	5.08611	5.1562	5.21214	5.47062	5.36431	5.3219	5.45395	0.0644206	0.0366803	0.051865	0.055053	0.0564898	0.0300852	0.0478346	0.0345794	0.0413289	0.0433251	0.0438525	0.035069	0.0524288	0.0405116	0.0288604	0.048437	0.0600992	0.0689512	0.0692081	0.0456698
axo01025-f_at	10.7565	9.87082	9.34996	8.91698	8.88911	8.51084	8.17241	7.86614	7.35818	6.42661	5.4677	5.59555	5.39091	5.12987	5.06343	4.92384	5.01147	5.05688	5.22113	5.12861	0.0234377	0.0711722	0.0695798	0.0963312	0.0848773	0.0585299	0.0544795	0.0833852	0.076514	0.163719	0.144657	0.205296	0.0706245	0.0443497	0.0564698	0.0553561	0.0429124	0.0491428	0.0672482	0.0734773
axo01028-r_at	4.28185	4.16141	4.28073	4.35463	4.20915	4.16586	4.16906	4.19783	4.17562	4.09438	4.13239	4.16926	4.22577	4.19762	4.15719	4.12679	4.01662	4.12453	4.19644	4.21872	0.0357483	0.0560649	0.0587803	0.0388895	0.0345366	0.0540904	0.0473997	0.0407653	0.0298811	0.0436338	0.0402333	0.0446305	0.0452385	0.0571826	0.0370843	0.0564334	0.056808	0.0646043	0.0394932	0.0587931
axo01029-f_at	8.01591	7.99537	7.89044	8.07998	7.84281	7.69817	7.67965	7.60716	7.58449	7.5018	7.64696	7.90191	7.64526	7.79837	7.78052	7.80778	7.45862	7.76848	7.76929	7.91375	0.0270248	0.0337355	0.0223947	0.023581	0.028959	0.0380039	0.0327361	0.032716	0.0407464	0.0356387	0.0512023	0.0281873	0.0430556	0.0531552	0.0393081	0.0572658	0.0574215	0.0482261	0.0415965	0.0409256
axo01030-f_at	4.45549	4.4793	4.51525	4.56716	4.48471	4.44529	4.43239	4.48426	4.55318	4.51656	4.53502	4.52838	4.61811	4.58776	4.62575	4.56611	4.48925	4.5394	4.58367	4.58795	0.0307017	0.0316238	0.0399588	0.0348672	0.0293261	0.0366972	0.0393447	0.0265299	0.033411	0.0296108	0.0411938	0.0263947	0.0284264	0.032891	0.0318383	0.0249232	0.0267071	0.025007	0.0399163	0.0321674
axo01032-r_at	4.65497	4.58218	4.64235	4.3307	4.15568	4.57826	4.5189	4.45016	4.44448	4.50904	4.49438	4.4914	4.56672	4.43172	4.49818	4.48341	4.59424	4.50301	4.55676	4.42523	0.0274401	0.0411558	0.0486008	0.020507	0.0389738	0.0360228	0.061706	0.0327704	0.0429295	0.0296858	0.0403588	0.0375689	0.0380753	0.0325156	0.0231095	0.0391931	0.0412065	0.0439054	0.0330082	0.0678502
axo01034-f_at	3.2716	3.2024	3.43091	3.18105	3.21829	3.1719	3.21457	3.24686	3.21706	3.3223	3.31632	3.3464	3.37198	3.32302	3.31364	3.47524	3.39214	3.34875	3.43123	3.31336	0.0289012	0.0297178	0.119012	0.046175	0.0401322	0.0301936	0.0334042	0.0487759	0.0418567	0.0338444	0.0393077	0.044189	0.0481228	0.0382085	0.0233283	0.0457645	0.0455218	0.0293379	0.0339952	0.0584256
axo01035-r_at	9.31583	8.7924	9.33293	9.34577	9.35034	8.7286	8.82861	8.32327	8.47309	7.73778	8.3593	8.30618	7.55037	8.65988	8.05119	7.98565	8.26032	8.03546	8.12101	8.38169	0.0571864	0.063726	0.0666939	0.0826776	0.0697751	0.125325	0.054787	0.102763	0.0850661	0.129045	0.0998029	0.108842	0.160962	0.131001	0.0970991	0.167135	0.0911924	0.126963	0.121651	0.0544494
axo01037-f_at	3.62866	3.69217	3.70081	3.57426	3.70986	3.5839	3.65098	3.61018	3.75572	3.68476	3.67795	3.72649	3.78552	3.73763	3.68881	3.72825	3.72076	3.74769	3.78513	3.67757	0.0392944	0.0292156	0.0733221	0.0361098	0.0280698	0.0411545	0.0330032	0.0399848	0.0344743	0.0421064	0.0338078	0.0337775	0.034035	0.0474269	0.0347693	0.0386723	0.0254483	0.0507481	0.0263735	0.0485669
axo01038-f_at	3.72656	3.62444	3.50919	3.55933	3.60273	3.51422	3.53818	3.53598	3.59841	3.50601	3.53279	3.48033	3.46637	3.55807	3.52636	3.51666	3.39348	3.52218	3.47056	3.50652	0.0561113	0.0416131	0.0542739	0.0454932	0.0286002	0.0390226	0.0302672	0.0323651	0.0340537	0.0492345	0.0410099	0.0365457	0.065106	0.0630156	0.025874	0.0511136	0.0422063	0.0460818	0.051081	0.0769158
axo01040-f_at	4.67385	4.62277	4.37454	4.31225	4.2961	4.49714	4.37148	4.39732	4.25973	4.23653	4.2791	4.29548	4.07541	4.22081	4.15601	4.07709	4.12985	4.04321	4.13282	4.07169	0.0465189	0.0620439	0.0569897	0.0602275	0.0620557	0.0622508	0.0596833	0.0453493	0.0513288	0.0524404	0.0689928	0.069139	0.087655	0.060108	0.0342609	0.0564976	0.0632486	0.0706395	0.0400659	0.0540219
axo01041-f_at	6.27579	6.4014	6.27315	5.95683	5.8482	5.92435	6.08625	6.11612	6.31376	6.18532	6.36565	6.21376	6.33202	6.41212	6.33265	6.35509	6.34399	6.28697	6.36141	6.4351	0.0319546	0.0240549	0.0319451	0.0403032	0.0246482	0.0332532	0.0319335	0.0379874	0.0372762	0.0364795	0.0170235	0.0186108	0.0285105	0.0324957	0.0234956	0.0354926	0.0242632	0.0358868	0.0281045	0.0352394
axo01042-f_at	6.97067	6.77478	6.4437	6.4266	6.44491	6.46469	6.43605	6.45393	6.52542	6.42467	6.36842	6.40059	6.4343	6.46852	6.44311	6.33835	6.34596	6.21383	6.55915	6.57663	0.0270947	0.0321667	0.0305915	0.0322519	0.0297402	0.0250461	0.0209444	0.0176022	0.0378369	0.0308732	0.0250276	0.02088	0.0324461	0.0327738	0.0213141	0.0310593	0.0347805	0.0205607	0.0216811	0.0195933
axo01046-f_at	4.1207	4.24718	4.10642	4.16978	4.17642	4.20068	4.09828	4.12957	4.13169	4.17719	4.14822	4.22924	4.30526	4.26264	4.22849	4.22477	4.30006	4.23126	4.1897	4.19797	0.0328512	0.0471705	0.0187997	0.0398144	0.0361152	0.0271587	0.0260203	0.031048	0.0248258	0.0383248	0.0195747	0.0248481	0.0454523	0.05432	0.026247	0.0385155	0.0390225	0.0321409	0.0437593	0.0363846
axo01049-f_at	6.40719	6.53771	6.86119	6.63804	6.74481	6.96254	7.11176	7.00666	6.79014	6.30428	6.43537	6.15792	5.99023	5.67088	5.77689	5.41667	5.65101	5.52724	5.41593	5.63248	0.0495603	0.0729185	0.0437906	0.026697	0.0783945	0.0655271	0.0714585	0.0550344	0.0574271	0.0906372	0.0777164	0.0711714	0.113481	0.0641205	0.0506112	0.0495618	0.0594574	0.0649577	0.046494	0.050545
axo01050-f_at	5.53728	5.7562	5.87454	6.54278	6.2436	6.33974	6.2041	6.1587	5.99176	5.97058	6.68338	6.50608	6.18152	6.02858	5.9509	6.6079	6.34013	6.36788	5.84973	5.46302	0.102085	0.07549	0.113273	0.0714947	0.0828525	0.119145	0.096633	0.093596	0.113449	0.0844515	0.0431415	0.0462902	0.0331806	0.0436959	0.0358124	0.066962	0.0982194	0.0695403	0.0625542	0.0795577
axo01051-f_at	3.35203	3.35376	3.37805	3.38119	3.37106	3.44011	3.3918	3.49285	3.49643	3.52411	3.42049	3.46837	3.43035	3.44069	3.39821	3.43176	3.47582	3.37148	3.40105	3.40442	0.0582607	0.0303346	0.0427863	0.045734	0.0395968	0.0679705	0.044473	0.0461672	0.0442669	0.0420697	0.024294	0.0307999	0.0578951	0.0306402	0.045984	0.0550023	0.0391174	0.0471222	0.034956	0.0508829
axo01052-f_at	9.77359	9.45485	8.945	8.76206	8.82837	9.00421	9.11881	9.26399	9.37044	9.06506	9.01755	8.95135	9.06894	9.0911	9.07865	9.14417	8.97347	8.98905	8.85089	8.94745	0.0545449	0.0491311	0.0502744	0.0340069	0.0461505	0.0296706	0.0367437	0.04139	0.0391032	0.0168385	0.0288193	0.0370706	0.0194891	0.0278177	0.01934	0.047021	0.0519196	0.0299322	0.0226137	0.0284418
axo01053-f_at	3.74894	3.65625	3.73105	3.76697	3.87412	3.70719	3.68744	3.74944	3.6487	3.65422	3.69958	3.76696	3.69273	3.80198	3.88518	3.80599	3.69403	3.69498	3.81276	3.75514	0.0439181	0.0214509	0.0316121	0.0583083	0.0566238	0.0409929	0.0349964	0.0249555	0.0286088	0.0388577	0.0271873	0.0474005	0.0467713	0.035244	0.0492702	0.0373321	0.0463249	0.035608	0.0435823	0.0591933
axo01055-r_at	4.1064	4.21996	4.01417	3.97801	3.936	3.87047	3.95991	3.85669	3.89712	3.93587	4.00309	4.20766	3.9622	3.99003	3.96191	4.19914	3.98337	4.10538	4.25517	4.61076	0.0832889	0.0842004	0.0461607	0.0320384	0.0525276	0.0590747	0.0791836	0.0611125	0.056915	0.0507077	0.0524037	0.199963	0.0697867	0.09104	0.0498528	0.136614	0.0433813	0.156807	0.0656777	0.114518
axo01057-f_at	5.73621	5.81854	5.35828	5.30898	5.3951	5.29134	5.57735	5.17664	5.28923	4.9255	5.40648	5.45304	5.27988	5.47173	5.18766	5.82023	5.39513	5.63733	5.97359	6.86719	0.140795	0.174775	0.0963705	0.123564	0.150344	0.11345	0.135025	0.0882723	0.162542	0.12205	0.12919	0.237536	0.109064	0.193332	0.101527	0.244527	0.104295	0.225844	0.0951004	0.150989
axo01060-f_at	3.71232	3.80905	3.77661	3.80027	3.71889	3.7561	3.82804	3.83518	3.75877	3.83495	3.84658	3.92145	3.93337	3.8635	4.0409	3.89596	3.89964	3.96506	3.84501	3.98532	0.0360988	0.0342042	0.033513	0.0508378	0.0520283	0.0404535	0.0322454	0.0490849	0.03101	0.0460047	0.0357561	0.0364008	0.0398024	0.0216825	0.0359053	0.0290694	0.0266775	0.0356361	0.0401544	0.0513559
axo01061-r_at	8.22139	8.18494	8.15433	8.41452	8.30324	8.29341	8.25585	8.12171	8.17476	8.23423	8.27959	8.35319	8.3367	8.38201	8.42161	8.41783	8.4296	8.3553	8.37938	8.47895	0.0235375	0.0232102	0.029471	0.0386022	0.0239984	0.0179653	0.0212631	0.0225794	0.0230721	0.0214877	0.0210553	0.0129144	0.0225874	0.0239236	0.0200734	0.0154284	0.0213201	0.0145922	0.0183466	0.0181052
axo01062-f_at	9.93701	9.81729	9.90948	9.7938	9.58102	9.26401	9.25585	9.50871	9.49431	9.80664	9.8995	10.1271	9.75432	9.91665	9.91088	9.92552	10.07	10.2991	10.3156	10.3014	0.0353545	0.0565335	0.0579417	0.0383015	0.0375693	0.0515202	0.0474333	0.0283059	0.0384833	0.0459789	0.0424122	0.0302549	0.0384623	0.0420109	0.0264987	0.0375324	0.0286296	0.023804	0.0147205	0.0210298
axo01063-f_at	3.90225	3.94594	3.94658	4.00613	3.9597	4.03452	4.04708	4.00882	4.02172	4.06796	4.05372	4.07379	4.10244	4.11403	4.1073	4.00536	4.01475	3.95507	4.06212	3.93117	0.0386234	0.0427856	0.0220363	0.0379795	0.0340968	0.0462416	0.0498276	0.0374301	0.0352701	0.0462146	0.0374667	0.0412571	0.0319271	0.0409319	0.0446051	0.0366894	0.0251236	0.020354	0.0518415	0.0445541
axo01064-f_at	3.9421	3.9848	4.22882	3.92784	3.86587	3.76776	3.83482	3.81358	3.73725	3.76139	3.68238	3.80013	3.83745	3.80173	3.86295	3.74449	3.85824	3.85857	3.91909	3.95513	0.0672509	0.0489889	0.137463	0.0510527	0.0512412	0.0271671	0.0332672	0.0376621	0.0585564	0.0278623	0.0408585	0.0238964	0.0441305	0.0247208	0.0498705	0.0388516	0.0451905	0.0360354	0.0326923	0.0591084
axo01065-r_at	5.78407	6.01386	5.56712	5.70176	5.93599	6.30079	6.64691	6.9401	7.13173	6.87477	7.37468	7.10673	7.16278	7.26179	6.88289	6.4739	6.53874	6.62516	6.84121	6.15592	0.0994604	0.0868398	0.101221	0.0965931	0.0925258	0.121921	0.0755499	0.0931382	0.116791	0.0851794	0.13738	0.118013	0.160189	0.0839259	0.116683	0.124917	0.167145	0.106031	0.0917564	0.148092
axo01066-f_at	3.91773	3.92476	3.93281	4.08792	3.95043	4.13118	4.10423	3.99828	3.90382	4.14137	4.275	4.06869	4.15732	4.07416	3.87682	3.96779	4.11771	4.22821	4.16635	4.06313	0.032531	0.0412166	0.0556036	0.0665706	0.0374358	0.0809121	0.115509	0.0504194	0.02301	0.0730094	0.0923824	0.0573355	0.0607846	0.0824629	0.0372418	0.046508	0.104608	0.0786882	0.0828787	0.0875128
axo01067-r_at	4.15601	4.24504	4.17777	4.49569	4.63634	4.79457	4.93368	4.84333	4.44167	4.61393	4.57001	4.7547	4.75125	4.90609	4.47469	4.72975	4.4063	4.73305	4.85921	4.60383	0.076336	0.0722444	0.0634007	0.0728244	0.137741	0.151225	0.126792	0.0624452	0.0983595	0.0666495	0.105089	0.0907571	0.128617	0.137658	0.07146	0.123495	0.134223	0.175246	0.159281	0.0955717
axo01068-f_at	3.61805	3.74591	3.69943	3.70857	3.59911	3.68076	3.75306	3.6354	3.62407	3.69117	3.66262	3.79401	3.75976	3.75782	3.88406	3.73026	3.70156	3.83751	3.84553	3.80645	0.0384975	0.0421821	0.0418059	0.0440086	0.0247454	0.0441039	0.0562842	0.0392217	0.034869	0.0256021	0.0391926	0.0311769	0.044413	0.0345541	0.0479673	0.0495894	0.0494722	0.0497832	0.0144387	0.041646
axo01073-f_at	4.59233	4.30569	4.38537	4.67775	4.5672	4.44824	4.48222	4.49838	4.48674	4.39434	4.61482	4.82621	4.64125	4.64372	4.63136	4.7586	4.74275	4.62901	4.61958	4.5832	0.0458944	0.0522155	0.0471548	0.0432057	0.0284201	0.0888572	0.0867133	0.0761674	0.0536395	0.0540069	0.038854	0.0551669	0.0356444	0.0352861	0.037304	0.0539938	0.0641908	0.06143	0.041818	0.0706088
axo01075-f_at	4.72441	4.77911	4.69256	4.6648	4.63348	4.66144	4.50004	4.57977	4.59749	4.57472	4.65583	4.61701	4.64485	4.65532	4.594	4.67709	4.61945	4.58395	4.69013	4.65151	0.0425253	0.0514781	0.0318028	0.037929	0.0293944	0.0212003	0.0239009	0.0317103	0.0312389	0.0307302	0.0334011	0.0335483	0.0347975	0.0303537	0.0284256	0.0386848	0.0460182	0.0467749	0.0316651	0.0292101
axo01077-f_at	7.16749	7.26163	7.19763	7.53009	7.39912	7.67116	7.31904	7.33705	7.42555	7.41953	7.70134	7.65927	7.39424	7.40277	7.27268	7.71784	7.58098	7.41706	7.2518	7.20818	0.0645608	0.0532616	0.060968	0.0396401	0.0363208	0.0513977	0.0609488	0.0473559	0.0611064	0.0410353	0.0294844	0.0430279	0.0429002	0.0553329	0.0491318	0.0548048	0.0614467	0.0404586	0.0355581	0.0290745
axo01080-r_at	4.64834	4.96878	4.76444	4.78134	5.06251	4.66351	5.06227	4.91241	4.64954	4.8845	4.85942	4.75282	4.91804	5.10318	4.65331	4.86899	5.16289	4.62256	4.72185	5.05029	0.0532723	0.0812633	0.0279108	0.0524313	0.131232	0.0525054	0.133307	0.115695	0.0158	0.134463	0.117364	0.103048	0.119524	0.137033	0.0266469	0.101446	0.146136	0.0532886	0.0347853	0.120572
axo01081-r_at	4.43573	4.39369	4.51684	4.40284	4.34509	4.25362	4.20138	4.1911	4.18757	4.15461	4.19432	4.27137	4.32163	4.35917	4.38521	4.39737	4.50244	4.44876	4.41597	4.57234	0.0430318	0.0390518	0.105348	0.0283139	0.0389155	0.0481677	0.052686	0.0422464	0.0401659	0.03796	0.0411346	0.0460504	0.0591619	0.0637264	0.0232853	0.0755701	0.0556617	0.0406269	0.0262313	0.044569
axo01084-r_at	6.69823	7.45097	7.42552	6.85325	6.84576	6.78787	6.60359	6.92009	6.96173	7.22859	7.4997	7.5492	7.3631	7.58844	7.79187	7.45046	7.91546	7.55591	7.89	7.06954	0.142799	0.0739873	0.0955303	0.0664392	0.0725554	0.133623	0.135061	0.0728735	0.0978645	0.0564555	0.0812558	0.111025	0.111026	0.075874	0.10077	0.0920555	0.0977755	0.0770524	0.127464	0.105098
axo01085-f_at	3.41155	3.46419	3.38215	3.35667	3.31719	3.2934	3.36185	3.29631	3.2826	3.34274	3.38358	3.33755	3.33637	3.32229	3.37998	3.37414	3.30697	3.4056	3.34355	3.43389	0.0476579	0.0453945	0.0332314	0.0298642	0.0259982	0.0261849	0.0403524	0.0395663	0.0311763	0.0416161	0.0331066	0.0454906	0.0472858	0.036899	0.0454483	0.0428483	0.0354689	0.0395316	0.027261	0.0284776
axo01086-f_at	4.81709	4.39955	4.62825	4.1869	4.35553	3.94914	3.87241	4.15958	4.21	4.43919	4.21573	4.56081	4.86042	5.17017	5.37222	5.29694	5.77235	5.6185	5.22363	5.43605	0.052054	0.0506993	0.134065	0.0823356	0.0972361	0.0458928	0.0530264	0.0563518	0.0493556	0.0509585	0.0476168	0.0620637	0.0533617	0.054728	0.0585117	0.0858981	0.0823697	0.102262	0.0695428	0.0777762
axo01087-r_at	8.77242	8.89275	8.83783	8.64409	8.4167	8.16901	8.23383	8.23941	8.37996	8.36574	8.55929	8.61934	8.48829	8.4862	8.59539	8.77518	8.78237	8.60484	8.65532	8.83022	0.0341121	0.0197915	0.0358856	0.0270872	0.0261886	0.0343341	0.023394	0.0186017	0.0304965	0.0121089	0.0233913	0.0265458	0.0304831	0.02217	0.0161361	0.0167099	0.0202558	0.0152009	0.0202792	0.0152215
axo01088-f_at	6.4197	6.58847	6.20601	6.43289	6.18365	6.16007	6.16582	6.12803	6.26487	6.27947	6.35139	6.22825	6.12862	6.06074	6.20059	6.65271	6.67854	6.20384	6.02937	6.00366	0.0491147	0.0502079	0.0683563	0.0798759	0.0602836	0.0691732	0.0711408	0.0453238	0.0581319	0.039443	0.0642915	0.0709806	0.131985	0.0804002	0.0905801	0.0458205	0.0687712	0.0862653	0.0682023	0.0444555
axo01089-f_at	3.91482	3.96866	4.36116	3.96066	3.91492	3.83006	3.77895	3.66545	3.72095	3.7188	3.8072	3.73534	3.78431	3.6908	3.71585	3.77018	3.80159	3.72174	3.8384	3.76944	0.0708555	0.0525631	0.242018	0.0643332	0.0384255	0.0336784	0.0550018	0.0480271	0.0381823	0.0330145	0.0339107	0.0546038	0.0339898	0.0409181	0.0341094	0.0286104	0.0429855	0.0397788	0.0419583	0.0381322
axo01090-f_at	3.58181	3.55539	3.48733	3.56868	3.55049	3.41319	3.44102	3.46088	3.50287	3.44001	3.5123	3.47305	3.59092	3.45844	3.45084	3.55883	3.50274	3.50608	3.55522	3.58441	0.0308352	0.0436909	0.0147088	0.0347406	0.0351882	0.0462547	0.028849	0.0372816	0.0252282	0.0486449	0.0211723	0.028504	0.0376282	0.0199682	0.0242486	0.0336675	0.0313288	0.0287085	0.0354564	0.0324245
axo01091-r_at	7.81996	7.62437	7.7537	7.43861	7.33877	7.01689	7.27444	7.49073	7.67079	7.60352	7.54331	7.50487	7.59114	7.5511	7.57559	7.67113	7.63103	7.59553	7.82069	7.73301	0.032103	0.0165205	0.0298025	0.0430424	0.0358547	0.0330361	0.0343128	0.0411138	0.0240402	0.0346855	0.0239091	0.0234248	0.0269597	0.0464227	0.0261739	0.028579	0.0342073	0.0349315	0.0236741	0.0186541
axo01092-f_at	9.88301	9.5817	9.60686	9.54482	9.49941	9.3549	9.3596	9.51439	9.45158	9.66188	9.46219	9.61819	9.65925	9.72391	9.74607	9.70404	9.82386	9.64852	9.76008	9.84375	0.0189125	0.0236341	0.0301147	0.015279	0.0274007	0.028753	0.0214951	0.0181063	0.0300975	0.0225482	0.0292644	0.0298663	0.0188266	0.0279609	0.0226766	0.0433548	0.0293473	0.0315784	0.0272743	0.0195786
axo01093-r_at	3.45282	3.42527	3.50281	3.51965	3.51192	3.55345	3.52381	3.53838	3.54827	3.58658	3.55841	3.58463	3.54593	3.51585	3.46399	3.53795	3.47354	3.4143	3.52074	3.51373	0.0307466	0.0175474	0.0315958	0.0477293	0.037721	0.0477471	0.0297747	0.0380518	0.0371293	0.0453794	0.0440705	0.0448585	0.0509211	0.0171554	0.0320786	0.0477601	0.0414831	0.0394967	0.0483234	0.0342802
axo01094-f_at	6.34037	6.45973	6.64261	6.2376	6.14561	6.19083	6.3347	6.23125	6.24251	6.12512	6.06611	6.12236	6.22745	6.22424	6.15059	6.20182	6.1775	6.31946	6.36546	6.52736	0.0562961	0.0167603	0.0497014	0.0159925	0.0173205	0.0391201	0.0457306	0.0417223	0.0399259	0.0305705	0.042844	0.0216823	0.0473199	0.0374634	0.0386161	0.0353438	0.0255147	0.0243667	0.031042	0.037105
axo01095-f_at	6.59708	6.29146	6.02121	5.88977	5.7701	5.63313	5.8513	5.74881	5.69758	5.46759	5.59669	5.31709	5.31716	5.26351	5.19612	4.93513	4.96091	4.90724	5.1068	5.07663	0.0641959	0.080073	0.0732645	0.0663946	0.0664788	0.0746618	0.0856305	0.0559506	0.0633766	0.0714366	0.074652	0.101776	0.0855707	0.109539	0.0830082	0.0609881	0.0374973	0.0777155	0.0848937	0.0640681
axo01097-r_at	3.60229	3.48195	3.56698	3.50337	3.48384	3.39007	3.34267	3.28605	3.31075	3.36389	3.40465	3.39464	3.40786	3.39255	3.40545	3.58268	3.4698	3.4013	3.38117	3.49816	0.0621424	0.0334165	0.0626785	0.0393736	0.0489237	0.0409484	0.021416	0.0279987	0.0326279	0.039423	0.0316491	0.0350288	0.0410684	0.0322404	0.03397	0.0322011	0.0444804	0.0413759	0.0238081	0.0572077
axo01098-r_at	6.83827	6.70829	6.94438	6.83093	6.93362	6.66115	6.81643	6.90644	6.74075	6.54848	6.76659	6.92148	6.9565	6.94855	6.82287	7.02276	7.01036	7.06324	6.97755	7.21934	0.0588396	0.0672111	0.0949327	0.090807	0.0359464	0.0827634	0.060613	0.04297	0.0370807	0.0668725	0.0395498	0.0603737	0.0677595	0.0512279	0.0696934	0.0745783	0.0625673	0.0615774	0.0720306	0.0442806
axo01099-r_at	4.04017	4.20466	4.38397	4.1342	4.11851	4.12223	4.06024	4.15384	4.09493	4.09998	4.18196	4.04346	4.14105	4.07446	4.02126	4.16964	4.15688	4.07347	4.11568	4.08202	0.0267554	0.0226639	0.0664897	0.0332819	0.0257216	0.0294398	0.0296719	0.0266703	0.0308614	0.0454267	0.0295689	0.0497637	0.0406033	0.0458731	0.0467236	0.0411065	0.0377187	0.0343542	0.049273	0.0365422
axo01100-f_at	7.70858	7.62067	7.51943	7.32651	7.39119	7.36852	7.56173	7.6547	7.64541	7.60472	7.60082	7.71275	7.82474	7.97306	8.0599	8.09813	8.11924	8.12326	8.03408	8.08321	0.023825	0.0205497	0.0241215	0.0308177	0.0342381	0.0270681	0.025904	0.017712	0.0208491	0.0316817	0.0215457	0.0166544	0.0236925	0.0115615	0.0177645	0.0267865	0.0206031	0.0303744	0.014476	0.0231253
axo01101-f_at	8.14083	8.33534	8.53281	8.66656	8.25248	8.0533	7.80357	7.56361	7.17285	7.76206	7.71347	7.86927	7.67841	7.90223	7.84462	7.80716	7.79328	8.08073	7.95694	7.92176	0.0524054	0.0708049	0.0730732	0.0547576	0.0472361	0.0468521	0.0499003	0.0588861	0.0584268	0.0388564	0.0716858	0.077737	0.035575	0.0494349	0.0381635	0.047027	0.0544256	0.0378011	0.0432717	0.044305
axo01103-f_at	4.0513	4.05977	4.11267	4.0857	4.15124	4.15097	4.18125	4.29172	4.26252	4.2508	4.32015	4.27947	4.32528	4.31185	4.34868	4.4311	4.292	4.3839	4.41476	4.47418	0.0211147	0.0517691	0.0489311	0.043812	0.0397766	0.0340762	0.0276709	0.0327528	0.0213423	0.0493465	0.0276569	0.0337463	0.0319587	0.0271445	0.0234899	0.0393174	0.0265224	0.0341793	0.0487643	0.0363385
axo01104-f_at	4.14126	4.16846	4.21531	4.05744	4.13623	4.05051	4.01475	4.00205	4.07715	4.03789	4.03634	4.01351	4.02566	4.07498	4.05525	4.01985	4.03315	4.05802	4.0573	4.06564	0.0351952	0.0379122	0.031038	0.0496471	0.0579771	0.0486209	0.0489213	0.0349955	0.0353679	0.0331893	0.0290732	0.0418271	0.0526339	0.0499131	0.0398374	0.0402454	0.0654637	0.039782	0.0504618	0.0418978
axo01106-r_at	3.24126	3.28716	3.4058	3.38247	3.26995	3.05055	3.08125	2.97883	2.97964	3.00432	2.9948	3.00127	3.01459	2.98634	2.98598	3.0391	3.02066	3.04362	2.93781	2.92155	0.0534585	0.054859	0.0728651	0.063212	0.0751778	0.0403343	0.0549325	0.0516957	0.0332951	0.0522961	0.0348232	0.0301397	0.0469662	0.0518078	0.0331709	0.0411556	0.0331692	0.0314068	0.0430936	0.0325454
axo01107-f_at	6.59069	6.58167	7.00055	7.25922	7.28833	7.18813	7.27992	7.32635	7.2661	7.21883	7.25336	7.18083	7.40989	7.33319	7.33172	7.31351	7.3406	7.38003	7.287	7.17552	0.0344532	0.034951	0.0267362	0.0220525	0.0242486	0.039707	0.0410513	0.0558384	0.0372085	0.0405578	0.0188222	0.0327471	0.0188925	0.0612078	0.0334686	0.0486007	0.0291027	0.0360347	0.0265532	0.0318149
axo01108-f_at	3.15427	3.11733	3.13776	3.02613	3.0689	2.99106	3.04368	3.06475	3.04128	3.06734	3.08887	3.03282	3.05672	3.12524	3.06935	3.10843	3.11882	3.11695	3.13325	3.08333	0.0494764	0.029776	0.0361507	0.0371904	0.0283934	0.034414	0.0470003	0.0194166	0.0250753	0.0243076	0.0499132	0.0270859	0.0342317	0.0429784	0.0314976	0.0457615	0.0283702	0.0429212	0.0542292	0.0420165
axo01109-r_at	9.91212	9.79821	9.80516	9.92792	9.91442	9.89143	9.89169	9.96781	9.93591	9.91254	9.87536	9.9596	10.0312	9.98016	10.0353	9.91878	9.98465	10.0627	9.96963	10.0182	0.0175033	0.0154088	0.0164337	0.0133228	0.0116184	0.0238051	0.0251644	0.0148403	0.0149858	0.0161109	0.00640086	0.00911634	0.0160263	0.0105897	0.0185443	0.0102856	0.00524596	0.00892048	0.0101745	0.00290219
axo01111-f_at	3.77173	3.74992	3.8714	3.94627	3.86864	3.83105	3.9616	3.92764	3.93707	3.90476	3.91629	3.94028	3.91364	4.11117	4.03162	3.99112	3.92134	3.8551	3.87781	3.9738	0.042377	0.0639517	0.037561	0.0447574	0.0489924	0.0763331	0.0394564	0.0453568	0.0437203	0.0335717	0.0317592	0.0461575	0.0418813	0.0434467	0.0551546	0.0406962	0.0429296	0.0619124	0.0678705	0.031638
axo01114-f_at	3.67386	3.66945	3.65567	3.69992	3.64455	3.60639	3.57164	3.53577	3.54495	3.55846	3.5658	3.56965	3.62904	3.53915	3.57405	3.56708	3.69799	3.61221	3.58737	3.60938	0.0312805	0.0613286	0.0401911	0.0479784	0.0415955	0.0495348	0.034244	0.0284166	0.0310858	0.0348104	0.0587054	0.0429755	0.0472574	0.0216055	0.0313045	0.0511957	0.0469739	0.0525333	0.0404334	0.0492093
axo01115-f_at	3.9029	3.96975	3.96234	3.83607	3.96274	3.8085	3.88821	3.91552	3.85668	3.95372	3.90685	4.17398	4.27554	4.30463	4.22386	4.17407	4.32564	4.10425	4.11578	4.15386	0.0400524	0.0363602	0.067882	0.0445604	0.0373995	0.0386833	0.0285143	0.0299062	0.0390577	0.0434676	0.0433178	0.0739194	0.0789262	0.050199	0.0476426	0.0722714	0.0846001	0.0288576	0.0620245	0.0620425
axo01116-f_at	4.79755	4.8846	4.7827	4.88255	4.91587	4.92564	5.12575	5.20142	5.03211	5.04888	5.17329	5.13146	5.13333	5.22748	5.25419	5.18146	5.22964	4.95596	5.01082	5.0551	0.0483279	0.0534279	0.0450776	0.0389341	0.0636259	0.0585418	0.05188	0.0530576	0.0392667	0.0667154	0.0717019	0.0878428	0.0587623	0.0665419	0.0554134	0.0615395	0.0552662	0.0601829	0.0457719	0.0481684
axo01117-f_at	6.0975	5.62586	5.9493	6.14182	6.23289	6.15286	6.17909	6.22129	6.20542	6.19866	6.14383	6.32762	6.37644	6.41267	6.5304	6.29488	6.42406	6.6584	6.48469	6.46185	0.0349541	0.0691337	0.026643	0.0453452	0.0236601	0.036901	0.0349149	0.04598	0.0377935	0.0425712	0.0402924	0.0276657	0.0321375	0.0224172	0.0196403	0.0247135	0.0270444	0.0365064	0.0273386	0.0218425
axo01118-f_at	4.20947	3.95248	3.90016	3.97043	3.8146	3.90178	3.91782	3.88413	3.87856	3.92969	3.87377	3.9595	3.97449	3.87026	3.94506	3.9301	4.01857	3.96058	3.95803	3.99242	0.0501929	0.0567496	0.0499746	0.0527646	0.0323247	0.0322416	0.0443192	0.0298211	0.0508078	0.0433594	0.0301997	0.0512375	0.0538117	0.0350163	0.0357021	0.0348874	0.0381358	0.0636091	0.0378363	0.0458609
axo01119-r_at	10.3152	10.1401	10.1096	10.0983	10.0273	9.93278	9.89877	9.88472	9.92638	9.99395	10.0252	10.1155	10.1066	10.2181	10.2496	10.1974	10.1912	10.1066	10.329	10.3897	0.0120756	0.0069055	0.00789108	0.0100787	0.0078837	0.0116167	0.0136504	0.0205296	0.0131775	0.00935573	0.0107435	0.00919279	0.0138719	0.0113981	0.00713203	0.0175197	0.0124152	0.00787037	0.0114456	0.0155851
axo01121-f_at	3.88436	4.0303	4.03364	4.03664	4.01054	3.92069	3.97608	3.99749	3.94902	3.92851	4.0441	4.07529	4.01841	3.92998	3.91844	3.95045	3.91841	3.9533	3.89019	3.99563	0.0327661	0.0507815	0.0584585	0.0663281	0.0338758	0.0511687	0.0345659	0.0351381	0.0470329	0.0374436	0.0354732	0.0419703	0.0391472	0.0470749	0.0263804	0.036942	0.0321564	0.0544044	0.039703	0.0456075
axo01122-f_at	3.53416	3.56641	3.63843	3.69302	3.59317	3.57544	3.5673	3.514	3.52276	3.55292	3.57023	3.50823	3.42724	3.51397	3.47333	3.39647	3.44175	3.45375	3.48431	3.46382	0.0269375	0.0301741	0.0504124	0.038896	0.0247245	0.0401893	0.0393395	0.0312244	0.0417955	0.0513847	0.0405103	0.0306426	0.0295182	0.0327441	0.0450865	0.0443256	0.0173533	0.0344555	0.0370026	0.0410994
axo01123-f_at	4.15199	4.25274	4.25633	4.25741	4.14195	4.30553	4.28559	4.34657	4.32304	4.36223	4.37483	4.42608	4.38253	4.44309	4.34219	4.33337	4.37672	4.30486	4.47467	4.42227	0.0327528	0.03271	0.0358085	0.044988	0.0417031	0.0375658	0.037414	0.0504234	0.0469182	0.0511434	0.0437414	0.039146	0.0314395	0.0576821	0.0281757	0.0512404	0.0522515	0.02298	0.0488822	0.0426378
axo01124-r_at	7.33071	7.34662	7.72628	7.96682	8.10196	7.69134	7.74529	7.82453	7.83292	7.87519	7.77834	7.73861	7.75328	7.79066	7.77672	7.81662	7.9524	7.76064	7.67711	7.80968	0.0217315	0.0370157	0.0257589	0.0193644	0.0117488	0.0253116	0.0178159	0.015372	0.0249067	0.0203485	0.0158192	0.0124972	0.0321055	0.0135977	0.0149431	0.031273	0.0215336	0.0478877	0.0210747	0.0344298
axo01125-f_at	5.60573	5.3474	5.26195	5.31852	5.27878	5.22064	5.20048	5.16102	5.18323	5.10256	5.07839	5.03399	5.12528	5.08685	5.04916	5.15083	5.04626	5.25621	5.16898	5.06308	0.0369515	0.0563147	0.0405353	0.043065	0.037903	0.0293739	0.0348641	0.0410569	0.0278861	0.0518628	0.0217791	0.0196904	0.0392526	0.0361678	0.0221312	0.0359954	0.0408844	0.0355742	0.0320317	0.0253508
axo01126-f_at	6.33333	5.77802	5.43983	5.34106	5.28428	4.97316	4.89127	4.89538	4.56434	4.61456	4.62954	4.54114	4.64961	4.68829	4.71315	4.62325	4.68514	4.65672	4.82639	4.74965	0.0833951	0.0849589	0.0859932	0.0784346	0.092234	0.0269379	0.0501787	0.041424	0.0496409	0.0317969	0.0341076	0.0367862	0.0386125	0.0660192	0.0386249	0.0528191	0.0554429	0.0308301	0.0583899	0.0469614
axo01127-f_at	3.49571	3.47918	3.54449	3.54567	3.60338	3.54798	3.54986	3.50935	3.4349	3.62807	3.56574	3.54912	3.49463	3.47099	3.48001	3.50872	3.53254	3.54571	3.47128	3.48745	0.0368082	0.0447488	0.0481437	0.0367483	0.0305562	0.0314601	0.0296123	0.0307793	0.0227731	0.0273179	0.0356213	0.0280365	0.0214558	0.0337881	0.0317449	0.0504108	0.041564	0.0559382	0.0373824	0.0329432
axo01128-r_at	7.05292	7.26552	7.50012	7.39668	7.53085	7.49672	7.63543	7.58537	7.6498	7.65859	7.39087	7.30521	7.53632	7.52156	7.56813	7.45654	7.38592	7.32396	7.5959	7.71454	0.0321486	0.0494267	0.0456018	0.0330657	0.0281349	0.0359925	0.0295851	0.0217247	0.0295651	0.0291943	0.0372985	0.0712619	0.0251819	0.024225	0.0253153	0.0339085	0.035868	0.0336337	0.0319662	0.0356109
axo01129-f_at	3.83559	3.82414	3.79417	3.79126	3.79337	3.80793	3.82885	3.79431	3.85721	3.82148	3.94152	3.81056	3.81134	3.85386	3.76441	3.78152	3.89755	3.88954	3.76712	3.81339	0.0327397	0.022627	0.0322245	0.0344951	0.0503302	0.0314421	0.0205448	0.0541975	0.0429532	0.0419759	0.0344909	0.044633	0.0466133	0.0583469	0.0215649	0.0406732	0.0300682	0.0387804	0.0412817	0.037725
axo01130-f_at	6.47502	6.10045	6.23487	6.42668	6.55698	6.44236	6.50925	6.62397	6.61021	6.58854	6.35224	6.63335	6.62301	6.52644	6.6375	6.60658	6.59541	6.72763	6.66609	6.57694	0.0484222	0.0357842	0.0498919	0.0272318	0.0313558	0.034718	0.0441919	0.0304003	0.031848	0.033968	0.0177502	0.0289256	0.0268891	0.0293642	0.0266493	0.0299234	0.0288281	0.0291903	0.026153	0.0396631
axo01131-f_at	7.80513	7.5157	7.30086	7.26094	7.05097	6.93644	6.61416	6.51132	6.63897	6.61715	6.5797	6.87509	7.00932	6.93921	7.02834	7.19596	7.27546	7.13167	7.30749	7.24248	0.0694861	0.0698368	0.0675893	0.0827821	0.0745076	0.0637555	0.0688974	0.0498166	0.0351788	0.066503	0.0500936	0.0608331	0.0540585	0.0630563	0.0645602	0.0468591	0.0450941	0.0561633	0.0464141	0.0337402
axo01137-r_at	5.9743	6.25293	6.02792	6.16208	6.14322	6.10541	6.15252	6.22616	6.24185	6.33584	6.37711	6.38779	6.37568	6.24451	6.27739	6.26448	6.15042	6.41174	6.2511	6.38156	0.0418583	0.0538109	0.0465037	0.040586	0.0456439	0.030085	0.0351199	0.0423797	0.0454588	0.0301032	0.0230709	0.0530586	0.0495066	0.0522619	0.029923	0.0488068	0.0338106	0.0381578	0.0334217	0.0302011
axo01138-f_at	5.6103	5.68085	5.67478	5.76459	5.76034	5.73391	5.74404	5.72646	5.7661	5.71513	5.88663	5.77571	5.80384	5.71742	5.75021	5.90495	5.7464	5.68935	5.75647	5.71119	0.0352961	0.0322142	0.0412418	0.0389516	0.0228183	0.0340698	0.0264468	0.025944	0.0359032	0.0364022	0.0381289	0.0329536	0.0287071	0.0315	0.0219191	0.0501074	0.0337713	0.0373505	0.0346168	0.0382259
axo01139-r_at	3.66362	3.64413	3.74937	3.70653	3.70633	3.74418	3.67998	3.7013	3.68463	3.77524	3.80054	3.66061	3.77752	3.72683	3.6392	3.74266	3.78016	3.72352	3.655	3.60465	0.0473784	0.0646604	0.0638263	0.0433251	0.0435581	0.0487154	0.0461908	0.0695954	0.0310056	0.0389211	0.0419824	0.0457712	0.0158296	0.0473058	0.0258445	0.0520142	0.0492486	0.047	0.0273119	0.0389031
axo01143-f_at	5.74841	5.87617	5.83552	5.04729	5.31493	5.37776	5.57308	5.62688	5.88668	5.85112	5.84718	5.88811	6.0724	6.19533	6.34056	6.39883	6.54324	6.25525	6.43411	6.44602	0.0856744	0.0716813	0.0701483	0.0913128	0.0923821	0.0643681	0.0815927	0.0544917	0.0482548	0.0615941	0.0640285	0.0547344	0.0541795	0.0361988	0.0443787	0.0871359	0.0515841	0.0466064	0.0322598	0.0435006
axo01144-f_at	3.91818	3.98128	4.04254	3.97805	4.00307	3.86142	3.8723	3.87059	3.85412	3.84165	3.94748	3.83588	3.8932	3.89611	3.86855	3.98716	4.01977	3.94243	3.91968	4.07085	0.0340845	0.046117	0.0831545	0.0363589	0.0514555	0.0606805	0.0301676	0.0443046	0.0383543	0.0450781	0.057742	0.039384	0.0444068	0.0406979	0.0332371	0.0512917	0.049942	0.0296737	0.0429624	0.0340454
axo01145-f_at	5.387	5.25121	5.17479	5.09662	5.10161	5.29262	5.49624	5.66319	5.3974	5.27485	5.16847	5.29407	5.37569	5.44284	5.55126	5.43184	5.68226	6.01309	5.84318	5.53065	0.0385017	0.0517574	0.0815453	0.0449959	0.0464073	0.0458518	0.024716	0.0539729	0.0736646	0.0750585	0.0497193	0.0375548	0.0414154	0.0430827	0.0715197	0.0786003	0.0638077	0.0597223	0.0274263	0.0629788
axo01146-f_at	7.57155	7.57634	7.17581	7.11072	7.16487	7.64063	7.87425	8.00904	7.79863	7.80063	7.52904	7.6453	7.76291	7.90766	7.9453	7.92186	7.9978	8.29296	8.21873	7.84517	0.0291948	0.0541172	0.0708972	0.0313381	0.0259962	0.0408997	0.0408261	0.0357203	0.0394363	0.0405402	0.0308513	0.0267025	0.0271829	0.0218709	0.0427947	0.0339513	0.0292265	0.0227912	0.019801	0.0270198
axo01147-r_at	7.22975	6.98498	6.96061	6.92623	7.37082	7.41143	7.35186	7.35552	7.16586	7.35161	7.18999	7.24153	7.48119	7.48937	7.52684	7.46412	7.38888	7.73903	7.69248	7.65153	0.0310838	0.0382568	0.0276043	0.0367962	0.0344838	0.0397851	0.0400547	0.0350609	0.0257583	0.0341484	0.0374485	0.0236175	0.037941	0.0243262	0.0215117	0.023772	0.0223328	0.0154569	0.031852	0.0400539
axo01149-r_at	5.52424	5.47753	5.31676	5.19127	5.63602	6.05978	6.11745	6.16209	5.9115	6.09541	5.92254	6.06108	6.28617	6.28075	6.27507	6.28889	6.06048	6.62507	6.55232	6.41581	0.0996551	0.0713521	0.071834	0.0892692	0.0699391	0.0717762	0.0490801	0.0506016	0.0514083	0.0403294	0.0758909	0.0551342	0.0667864	0.037034	0.0525255	0.0460989	0.0465762	0.0450655	0.0580336	0.0594036
axo01153-r_at	6.65998	6.65466	6.66964	6.54112	6.51483	6.20257	6.22375	6.08371	6.06828	6.1303	6.17833	6.21648	6.23043	6.16255	6.18779	6.2073	6.34987	6.23412	6.39973	6.45697	0.0461271	0.0533995	0.060189	0.0443379	0.0382337	0.0468277	0.0252611	0.0215533	0.0334304	0.0198162	0.0341556	0.0224655	0.0232691	0.0447828	0.0275731	0.0324474	0.028596	0.0244823	0.0311197	0.0410117
axo01154-r_at	6.68072	6.50694	6.92469	7.18673	7.05992	7.20535	6.71093	7.13581	7.22042	7.26516	7.0784	7.30138	6.63621	6.95622	7.33398	7.5102	7.14008	7.27648	7.08745	6.83514	0.0622908	0.0671213	0.0554864	0.0454726	0.042654	0.045371	0.082881	0.0745499	0.0514983	0.0478389	0.0905059	0.107897	0.110494	0.115926	0.0513955	0.0648209	0.0859276	0.0873865	0.0727183	0.0928131
axo01155-r_at	4.6707	4.6247	4.43767	4.29485	4.23592	4.75162	4.84927	4.83392	4.59301	4.53743	4.4056	4.73128	4.93725	4.97099	4.98597	5.23427	5.25588	5.30902	5.10569	5.04697	0.0543834	0.0704381	0.0709552	0.0758034	0.0610273	0.0508894	0.04935	0.0530763	0.0495112	0.0574669	0.0544707	0.0529696	0.0481475	0.0426432	0.0459768	0.0590882	0.0284727	0.0608862	0.0509017	0.0479112
axo01156-f_at	3.59402	3.7063	3.69126	3.65735	3.63908	3.67599	3.65217	3.61009	3.6237	3.61688	3.71569	3.72194	3.6516	3.68137	3.64118	3.69617	3.6492	3.63983	3.6766	3.56782	0.022163	0.0401498	0.0497481	0.0233978	0.0224982	0.0496271	0.0478977	0.0507905	0.0444663	0.0461939	0.0310029	0.0221071	0.0382831	0.0502746	0.0184718	0.0447228	0.0412094	0.0450864	0.0360062	0.0374519
axo01157-r_at	6.6231	6.47403	6.37029	5.86555	5.75865	5.50054	5.96716	5.75407	5.88157	5.70542	5.70451	5.76219	5.97196	6.11165	6.02177	6.01138	6.03705	6.33318	6.08121	6.11522	0.0534626	0.044683	0.050203	0.0448351	0.0472925	0.0731832	0.113047	0.0574748	0.0548754	0.0400957	0.0391784	0.0540003	0.0537058	0.0459465	0.0408247	0.0425404	0.0377731	0.0887631	0.0534143	0.0257107
axo01158-f_at	3.87633	3.90404	3.85452	3.8931	3.84233	3.90938	3.90227	3.89036	3.82123	3.83617	3.95303	4.00295	3.85346	3.7987	3.86113	3.97798	3.78439	3.84613	3.83356	3.82127	0.0510134	0.0269572	0.035824	0.0470125	0.0323067	0.0412219	0.0759408	0.0532151	0.0549409	0.0453631	0.0337466	0.0591009	0.0401539	0.0530875	0.0469778	0.0371089	0.0417948	0.0872025	0.0352326	0.0444646
axo01159-f_at	4.01308	3.98167	3.99289	3.85315	3.90665	4.03099	3.93826	3.92278	3.92446	3.81597	3.85155	3.92543	3.94933	3.92481	3.97321	3.95827	3.95476	3.9285	3.9831	3.93073	0.0543688	0.0422993	0.0565468	0.0308925	0.0280623	0.0431289	0.0415365	0.0304306	0.0415857	0.0359647	0.0549966	0.0500366	0.0425521	0.0436965	0.0391353	0.0487488	0.0520463	0.0412816	0.0428906	0.0513313
axo01161-f_at	3.37507	3.38067	3.39425	3.47963	3.40209	3.47067	3.4132	3.37468	3.42471	3.42319	3.48352	3.56515	3.49229	3.38963	3.48292	3.52709	3.46086	3.49948	3.49028	3.39684	0.0306469	0.041009	0.0439797	0.0424722	0.044919	0.0312766	0.0254571	0.0269186	0.0266854	0.0276034	0.040946	0.0286002	0.0354622	0.0341329	0.0367482	0.0622566	0.0387143	0.0528217	0.0317049	0.0403731
axo01162-f_at	6.7087	7.50887	7.18431	7.09826	6.80547	6.01853	6.03986	5.20296	5.3704	5.12439	5.20686	4.89856	4.84984	5.20083	5.11377	4.51157	4.40433	4.18967	4.22246	4.04398	0.158934	0.163329	0.16229	0.108281	0.119264	0.107973	0.181766	0.147087	0.132829	0.173966	0.16245	0.123537	0.169291	0.0863725	0.100631	0.15619	0.0947376	0.14618	0.0858709	0.0479927
axo01163-f_at	4.9541	5.53595	6.08173	5.44287	5.29484	5.10498	5.17568	4.84227	4.5671	4.80544	4.81146	4.6674	4.5424	4.50768	4.6098	4.62941	4.70008	4.65868	4.61724	4.74478	0.0589043	0.0593078	0.168777	0.0592306	0.0480124	0.0896332	0.0597137	0.062759	0.0317929	0.0382231	0.0551449	0.0421433	0.0251061	0.0485966	0.0654474	0.0590437	0.0360981	0.0379907	0.0410622	0.0851085
axo01164-r_at	8.99638	8.78077	8.34072	8.15192	8.01371	7.84552	7.99467	7.86583	7.89018	7.59223	7.62956	7.76414	7.72383	7.93427	8.07728	8.0744	8.18858	7.7666	7.7997	7.97869	0.0642926	0.0713247	0.0809404	0.0722907	0.0608402	0.031336	0.0238672	0.0258981	0.0479186	0.0374981	0.0335579	0.0433324	0.0286343	0.0423865	0.027872	0.0351048	0.0390251	0.0140349	0.0257487	0.0315115
axo01165-f_at	6.84294	6.71104	6.41426	6.3191	6.48162	6.56606	6.52957	6.68094	6.86905	6.8538	6.70265	6.94075	6.85452	6.97419	6.98581	7.06109	7.02043	7.0168	7.05928	7.04041	0.0270156	0.0221028	0.0350944	0.0317918	0.0271982	0.0222831	0.0461243	0.0309881	0.0300551	0.0216621	0.0314756	0.0155337	0.0309613	0.0211615	0.0253617	0.0221981	0.0216269	0.0165693	0.0235229	0.0166645
axo01167-r_at	6.21738	6.07434	5.96458	5.93664	6.05038	5.96349	6.02089	6.03747	6.02642	6.20233	6.09668	6.12825	6.13081	6.09528	6.25719	6.06003	6.13669	6.39317	6.3459	6.28541	0.0405903	0.0448986	0.0613193	0.0575741	0.0574881	0.0342882	0.0304044	0.0435259	0.0363617	0.0295157	0.0330817	0.0535305	0.0346099	0.0293449	0.0509442	0.0393205	0.0591056	0.0419582	0.0356473	0.0417034
axo01169-r_at	3.59947	3.58129	3.48514	3.41249	3.38569	3.45175	3.39792	3.51863	3.47563	3.39928	3.44142	3.40052	3.37811	3.43402	3.47436	3.45554	3.53884	3.56464	3.55953	3.52241	0.052997	0.0559547	0.0562599	0.0383352	0.0459267	0.0338414	0.0438565	0.0381475	0.058572	0.0390487	0.0343264	0.0348631	0.0478032	0.0386473	0.0456928	0.049939	0.0439951	0.0574941	0.0518579	0.039762
axo01171-r_at	5.01951	4.88029	5.10867	4.92899	4.70373	4.51661	4.53393	4.46299	4.50691	4.47608	4.51597	4.45408	4.48803	4.50441	4.50939	4.58683	4.48168	4.47607	4.5754	4.72129	0.0783605	0.0711653	0.152108	0.0814488	0.0584109	0.0512376	0.024673	0.031512	0.0274468	0.036508	0.038839	0.0347387	0.0232291	0.0510438	0.0328601	0.025228	0.0575065	0.0380903	0.0323807	0.0408063
axo01172-f_at	4.60042	4.39032	4.43571	4.35022	4.35918	4.25747	4.43301	4.37615	4.32927	4.48727	4.37323	4.42335	4.47316	4.73452	4.74719	4.82944	4.87564	4.55004	4.71083	4.86362	0.0654202	0.0475632	0.046979	0.0746003	0.0599232	0.0476496	0.0468535	0.0382295	0.0326033	0.0243067	0.0678427	0.0562343	0.0434758	0.0666484	0.0448576	0.0509116	0.0911053	0.0569853	0.052106	0.0667661
axo01173-f_at	5.91403	5.74865	5.81799	5.95889	5.75755	6.18759	6.1312	6.1754	6.20336	6.27559	6.25585	6.04589	6.07172	6.23646	6.27229	6.24486	6.35897	6.26009	6.26138	6.10249	0.0722856	0.0935172	0.08991	0.073644	0.038498	0.0523366	0.0536736	0.0551276	0.0695659	0.0611395	0.0350325	0.0652515	0.0720695	0.0624688	0.0701313	0.0653628	0.0710398	0.0845449	0.0874763	0.0227147
axo01174-f_at	7.60379	7.51411	7.65095	7.63963	7.67131	7.7385	7.72596	7.83627	7.9044	7.70522	7.96728	7.73701	7.76423	7.63997	7.76997	7.92229	7.70461	7.68103	7.71723	7.81947	0.0402102	0.067228	0.0704092	0.044042	0.0400386	0.0452073	0.0359346	0.0233085	0.0327509	0.0764837	0.0385992	0.0622923	0.0479984	0.065375	0.069178	0.0409832	0.0516335	0.0391054	0.0348629	0.043256
axo01175-f_at	6.52822	6.4363	6.54264	6.53014	6.48507	6.69397	6.58136	6.74907	6.75888	6.66131	6.78986	6.69817	6.72087	6.75262	6.84315	6.86216	6.79688	6.86153	6.85912	6.69951	0.042926	0.0544938	0.0598833	0.0515244	0.0363567	0.0224395	0.0300474	0.0175957	0.0333745	0.043108	0.028014	0.0443542	0.0340007	0.0495163	0.0404326	0.0341325	0.0582446	0.0490114	0.0497552	0.0284762
axo01176-f_at	5.77239	5.93607	6.15563	5.87418	5.8083	5.91233	5.94889	6.03936	6.09842	6.0058	5.93362	5.98938	6.11903	6.05161	6.07956	6.13597	6.0679	6.07285	6.18442	6.05258	0.0342571	0.0316312	0.134634	0.0303349	0.0246785	0.0306666	0.0279961	0.018446	0.0224227	0.0372105	0.0195697	0.0264692	0.0218421	0.0332075	0.0290462	0.0391271	0.016829	0.0203626	0.0291807	0.0225115
axo01177-f_at	3.60902	4.14042	3.96154	4.16228	3.58971	3.58567	3.4896	3.43477	3.46148	3.47696	3.42409	3.46724	3.50689	3.4877	3.5049	3.4581	3.45315	3.9194	3.92986	3.48012	0.066845	0.306876	0.229147	0.306015	0.0301408	0.042757	0.0350003	0.0273073	0.0404554	0.0411405	0.0414517	0.0434415	0.0517018	0.0370895	0.0467965	0.0404699	0.0440864	0.278455	0.250162	0.0240138
axo01178-f_at	9.24409	9.27898	9.28492	9.5523	9.55301	9.46439	9.22152	9.16964	9.45225	9.30501	9.46255	9.56323	9.42103	9.31894	9.37578	9.19187	9.09503	9.35259	9.29229	9.28108	0.030768	0.0221014	0.0257746	0.0254954	0.0223128	0.0287551	0.0224565	0.0140542	0.0255075	0.0294285	0.0507658	0.0340769	0.0358096	0.0508443	0.0380415	0.0460067	0.0514694	0.0331764	0.0299213	0.0239528
axo01179-f_at	4.18409	4.2097	4.14179	4.32287	4.23748	4.29661	4.21224	4.28353	4.44555	4.36611	4.44406	4.50305	4.53897	4.40402	4.35425	4.27983	4.28281	4.39743	4.33256	4.35861	0.054797	0.0232147	0.0328568	0.044039	0.055812	0.0577561	0.0391121	0.0299075	0.0426996	0.0677234	0.0307736	0.0687471	0.0870832	0.0395524	0.0638026	0.0519549	0.0509912	0.0574203	0.0483227	0.0643579
axo01180-f_at	5.60739	5.60003	5.38537	5.28172	5.37979	4.98766	5.19851	5.28689	5.23837	5.15739	5.18831	5.17006	5.33682	5.31027	5.28644	5.21696	5.26713	5.28089	5.28132	5.33815	0.0384061	0.029213	0.0329356	0.0345741	0.0370857	0.0239216	0.0206964	0.018073	0.0323779	0.0305946	0.0329312	0.027179	0.0289281	0.0330179	0.0202706	0.019297	0.0490435	0.0247658	0.031602	0.0346464
axo01181-f_at	4.34681	4.2258	4.19821	4.22208	4.19269	4.13917	4.20835	4.20064	4.18823	4.20773	4.28315	4.24665	4.21866	4.2793	4.1984	4.34909	4.3392	4.42853	4.38335	4.23094	0.0267742	0.0391988	0.0552894	0.0512266	0.0450361	0.0298747	0.0501932	0.0300135	0.0397018	0.0467655	0.046189	0.0384324	0.0160782	0.0310303	0.0255395	0.0233835	0.0450581	0.0339152	0.0385686	0.0254964
axo01185-f_at	8.44791	8.76051	8.39401	8.85883	8.47321	8.05753	7.71678	7.74192	7.70679	7.94756	8.31886	8.6506	8.2302	8.36981	8.84763	8.82951	9.05388	9.10918	8.84554	9.14813	0.0598635	0.0251016	0.0552213	0.0283278	0.0586033	0.0655684	0.108051	0.0453232	0.0636528	0.0963012	0.0460414	0.0475662	0.0838074	0.0713743	0.0429976	0.0729755	0.0355367	0.0310374	0.0397873	0.0472887
axo01187-r_at	4.11494	4.23698	4.23038	4.19947	4.10441	4.18557	4.12484	4.14414	4.13479	4.0902	4.18512	4.18896	4.1387	4.12188	4.19242	4.13385	4.10941	4.19816	4.1489	4.16522	0.0338926	0.0506311	0.0385505	0.0393979	0.0293058	0.04192	0.0288811	0.0258186	0.047828	0.0495914	0.0471612	0.0296473	0.0508156	0.048825	0.0236108	0.0257174	0.0395078	0.0379489	0.0622458	0.0390123
axo01188-f_at	3.34871	3.29703	3.29017	3.31423	3.30089	3.28595	3.27704	3.26941	3.22636	3.28719	3.34396	3.24815	3.347	3.4213	3.29109	3.32899	3.23892	3.3533	3.31169	3.28775	0.0556984	0.0396871	0.0255897	0.0437993	0.0386868	0.0466332	0.0322323	0.0170744	0.0516731	0.0358968	0.0353575	0.0153218	0.0375317	0.0643411	0.0326687	0.0399784	0.0453836	0.0570388	0.016336	0.0469084
axo01189-r_at	7.80085	7.50298	7.64631	7.56924	7.49429	7.36106	7.38827	7.41781	7.48423	7.52937	7.64295	7.51641	7.62034	7.68435	7.63896	7.70363	7.89598	7.73333	7.68789	7.64672	0.0229195	0.0301601	0.00942595	0.0186638	0.0243166	0.0197426	0.0322681	0.0233361	0.0307635	0.0239082	0.0275433	0.0199464	0.0238403	0.0197754	0.0354511	0.0160165	0.0330396	0.00990942	0.0243107	0.030815
axo01190-f_at	3.46601	3.51419	3.54077	3.56144	3.46701	3.52226	3.55341	3.43541	3.50778	3.58672	3.59983	3.58896	3.58394	3.49606	3.61142	3.49759	3.70737	3.55983	3.51685	3.59785	0.0462383	0.0573929	0.0573279	0.0337588	0.0430708	0.0393477	0.0232107	0.0262929	0.0309808	0.0616717	0.0390164	0.043829	0.0194327	0.0426389	0.0436872	0.0472449	0.075583	0.0381564	0.0271424	0.0436801
axo01191-f_at	3.66389	3.56263	3.67809	3.72345	3.68578	3.68747	3.72468	3.71409	3.72291	3.82919	3.82898	3.72912	3.81739	3.80512	3.79193	3.80839	3.80866	3.78376	3.8153	3.74918	0.0439361	0.0349989	0.0276134	0.0363802	0.0247852	0.0295044	0.0261639	0.0287104	0.034263	0.0488456	0.0562392	0.0431507	0.0510698	0.045087	0.0354283	0.0616937	0.0619724	0.029864	0.0445717	0.0350646
axo01192-r_at	9.27516	8.9387	9.03007	9.07179	9.23962	9.27331	9.36872	9.44391	9.23401	9.2524	9.19879	9.3742	9.43634	9.74174	9.69491	9.71031	9.68227	9.76855	9.8082	9.70852	0.0390142	0.0419719	0.0321166	0.029357	0.0135832	0.0198989	0.0311995	0.0268598	0.0248477	0.0188095	0.0271613	0.0155713	0.0177252	0.0246896	0.0235417	0.0235503	0.0229676	0.021067	0.0102208	0.0244229
axo01193-f_at	7.85169	7.81534	8.38745	8.52848	8.76424	9.00538	8.74491	8.73723	8.99373	9.07375	8.98042	8.99797	8.69709	8.71137	8.54306	8.51785	8.66093	8.55525	8.46523	8.52938	0.0293813	0.0800123	0.0375434	0.0367832	0.035473	0.035192	0.0466917	0.0196266	0.0240065	0.0293068	0.0307616	0.0231185	0.0493836	0.0405341	0.0365305	0.0538439	0.0346931	0.0217718	0.0288716	0.0185038
axo01194-f_at	3.97241	3.96654	4.02765	4.07932	3.97812	3.90754	3.89642	3.81973	3.87724	3.91109	3.90293	3.92697	3.91008	3.85908	3.93657	3.86525	3.84156	3.84766	3.97884	3.91298	0.0383646	0.0468317	0.0423877	0.0492585	0.0472597	0.0327236	0.0436732	0.0180428	0.0181734	0.0319551	0.0445076	0.0313428	0.0493625	0.0277292	0.0529306	0.0412585	0.0382606	0.0394103	0.0410152	0.0338461
axo01195-r_at	8.94283	8.74945	8.7957	8.524	8.51455	8.31215	8.35055	8.58359	8.71299	8.79244	8.84569	8.94298	9.00839	9.22315	9.23163	9.29025	9.24869	9.02643	9.22754	9.26065	0.0330644	0.031367	0.0443714	0.0320021	0.0253435	0.0467297	0.0364741	0.039444	0.0299955	0.017449	0.0119929	0.023369	0.0214465	0.0173723	0.0237324	0.0296505	0.019109	0.016273	0.0191903	0.0199554
axo01196-r_at	7.45355	7.45571	7.52038	7.24045	7.03738	6.52522	6.80352	7.15173	7.36518	7.19331	7.38115	7.22237	7.22746	7.37526	7.35303	7.49687	7.32271	7.19432	7.43429	7.52331	0.0239248	0.027906	0.0382557	0.0261671	0.0143169	0.0385379	0.0290553	0.0322504	0.0360759	0.0307461	0.0181907	0.028897	0.0357076	0.0294179	0.0249914	0.0335919	0.0272932	0.020653	0.0259586	0.0300931
axo01197-r_at	6.18865	6.2333	5.87256	5.90337	5.78936	5.86736	5.97501	5.97947	6.25496	5.96639	6.06749	6.28495	6.19233	6.32893	6.43897	6.53053	6.09725	6.04992	6.24349	6.442	0.0551251	0.0334501	0.0623895	0.0412976	0.0528004	0.0478879	0.0617231	0.0670272	0.0792678	0.051309	0.0461537	0.069183	0.0703793	0.0502719	0.0522258	0.0541336	0.0487384	0.0555653	0.072402	0.069939
axo01198-f_at	4.70777	4.79665	4.7628	4.86591	4.8025	4.81941	4.78608	4.727	4.7571	4.80598	4.75737	4.87633	4.85798	4.84218	4.84175	4.81198	4.85303	4.83488	4.83626	4.83857	0.0294402	0.0318089	0.0287834	0.027697	0.0468303	0.0338798	0.0282912	0.0318077	0.026824	0.0452233	0.0305154	0.0363434	0.0379973	0.0456641	0.0169652	0.0359567	0.0444658	0.0323644	0.0454624	0.0479539
axo01199-f_at	4.92173	4.79123	4.86558	4.90253	4.84737	4.96156	5.08455	5.16034	5.05321	5.09266	5.29974	5.11257	5.20078	5.2893	5.21406	5.06704	5.02119	5.03396	5.07052	5.06269	0.0401103	0.0639047	0.0390568	0.0445934	0.0556864	0.0328009	0.0551032	0.0550479	0.0377848	0.0453671	0.049442	0.0606253	0.0554173	0.0485963	0.0416005	0.0424248	0.0322988	0.0579895	0.031427	0.0399326
axo01200-r_at	7.49792	7.06645	6.94194	6.34965	6.69335	7.04292	7.46453	7.63275	7.40144	7.22647	7.10623	7.28736	7.5591	7.58196	7.79589	7.71178	7.77414	8.05183	7.90835	7.68067	0.0301601	0.0417947	0.0558654	0.0693333	0.0505983	0.0551347	0.0416596	0.0324966	0.0492314	0.0291736	0.0269867	0.0386114	0.0224046	0.0285879	0.0383184	0.0438152	0.0374496	0.0325776	0.0134986	0.0532176
axo01201-f_at	8.82962	9.24225	9.96295	10.0582	10.2183	10.179	10.0101	9.91766	9.67526	10.0622	9.93836	9.72943	9.42793	9.37987	9.11831	9.12186	8.95105	9.22969	9.02512	8.96229	0.02482	0.0271509	0.0124902	0.0238538	0.0148472	0.0335832	0.032906	0.051434	0.0547886	0.0418969	0.0359113	0.0551626	0.0448879	0.0339682	0.0196658	0.0323662	0.0324417	0.0232967	0.0188885	0.0323662
axo01202-r_at	5.50155	5.54629	5.48527	5.57059	5.54726	5.5111	5.60718	5.60346	5.38233	5.5783	5.48498	5.55039	5.63235	5.53694	5.75288	5.5928	5.69643	5.87184	5.82027	5.75149	0.0348424	0.0520649	0.0530569	0.025502	0.0412139	0.0418381	0.0539319	0.0318026	0.0413732	0.0454785	0.0591153	0.0518032	0.0385018	0.0268952	0.0341268	0.0199535	0.0313197	0.0416386	0.0422384	0.0507206
axo01203-f_at	9.69062	9.40679	9.53503	9.05013	9.14598	9.15804	9.29853	9.43238	9.58568	9.49144	9.32227	9.36516	9.52759	9.49191	9.3738	9.34685	9.30304	9.07509	9.04979	8.96839	0.0274012	0.0295289	0.0189438	0.0342979	0.0169746	0.018444	0.0213786	0.0208987	0.0129034	0.0181549	0.023399	0.0229477	0.0254987	0.0195149	0.0212636	0.0320006	0.0385154	0.0290998	0.0114956	0.0269268
axo01206-r_at	3.36299	3.36557	3.35948	3.37024	3.34284	3.38914	3.4349	3.36206	3.33283	3.40863	3.46751	3.41617	3.44447	3.45355	3.38005	3.36361	3.41384	3.44832	3.42464	3.39247	0.031836	0.0252858	0.0258957	0.0259109	0.0395039	0.0216425	0.0189994	0.0251462	0.0303713	0.0368275	0.0328443	0.0263587	0.0398167	0.0313745	0.0365082	0.0376899	0.0487135	0.0456964	0.0349181	0.0540359
axo01207-f_at	9.76194	9.84498	9.81617	10.0934	10.2626	10.6097	10.7946	10.9781	10.7318	10.7911	10.7047	10.842	10.906	10.8423	10.9173	11.0226	10.8656	11.279	11.2198	10.8454	0.0338136	0.0437873	0.058696	0.0286876	0.0176798	0.0115239	0.0177043	0.0196252	0.0405524	0.018805	0.0236227	0.0208033	0.0184592	0.0211104	0.0157626	0.0232497	0.0268437	0.0186785	0.0218264	0.0281151
axo01208-r_at	8.85379	8.95514	9.0099	9.10037	8.76236	9.01652	8.93683	8.96338	8.88848	8.99521	9.26692	9.29312	9.05895	9.22976	9.0964	8.75881	8.67026	8.97359	9.13705	9.1534	0.0311493	0.0376926	0.0265451	0.0295815	0.033244	0.0250209	0.036947	0.0487646	0.0305959	0.037603	0.0163441	0.0182101	0.0380514	0.0448132	0.0450625	0.034352	0.0391947	0.0433406	0.0374767	0.03911
axo01209-r_at	11.2522	11.2997	11.3133	11.3844	11.3579	11.461	11.5365	11.6497	11.601	11.5349	11.6314	11.6464	11.7358	11.831	11.8737	11.8957	11.913	11.9826	11.9497	11.8642	0.0119177	0.0130465	0.0153638	0.00689957	0.0139073	0.0091921	0.0124956	0.0125339	0.0117272	0.00828354	0.0172504	0.0150039	0.012754	0.0112751	0.0160503	0.0128836	0.00985072	0.0126786	0.00822359	0.0164778
axo01210-f_at	8.72282	8.50377	8.65251	8.71756	8.81367	8.78424	8.66687	8.60931	8.51633	8.59466	8.46663	8.74963	8.58609	8.74801	8.61744	8.58739	8.57068	8.79871	8.67633	8.70952	0.053869	0.0624379	0.0379182	0.0533761	0.0443249	0.0359932	0.0657076	0.0661974	0.0586526	0.0682525	0.0613737	0.0488034	0.0577456	0.0463781	0.0459717	0.0526053	0.0501986	0.0317661	0.0379378	0.0248937
axo01211-f_at	3.89972	3.97576	3.88504	4.10534	3.91046	3.87209	3.82539	3.8332	3.7884	3.83758	3.8127	3.89962	3.85561	3.88099	3.81575	3.82084	3.89667	3.84806	3.93101	3.93917	0.0511472	0.037565	0.0256315	0.0545621	0.0364249	0.0429442	0.0378503	0.0234852	0.0182233	0.0329566	0.0189209	0.0278037	0.0330653	0.052935	0.0308173	0.054576	0.0301966	0.0291279	0.0446548	0.0421475
axo01212-f_at	7.88756	8.23987	8.38232	8.48544	8.36386	8.12878	8.22174	8.16255	8.1066	8.27906	8.16786	8.27817	8.26393	8.29296	8.29678	8.16727	8.30947	8.35741	8.27308	8.2918	0.0371565	0.0361884	0.0320001	0.0265205	0.0271032	0.029228	0.0220878	0.0186841	0.0242056	0.033102	0.0204921	0.0385573	0.0357871	0.018246	0.0281511	0.0234715	0.0238912	0.017809	0.0160964	0.0304438
axo01213-r_at	5.25676	5.56026	5.43859	5.57226	5.46177	5.85713	5.73297	5.73666	5.71404	5.78505	5.77564	5.96341	5.87687	5.86785	5.89187	5.55976	5.61665	5.8479	5.78279	5.73624	0.0870725	0.0749188	0.0856399	0.0518942	0.0537187	0.058089	0.0693414	0.061173	0.0565594	0.0991231	0.0778825	0.0585214	0.0753164	0.0707368	0.0719077	0.0822867	0.0670005	0.0884376	0.0658777	0.0766085
axo01214-f_at	5.05379	5.30424	5.38987	5.46584	5.43179	5.28252	5.32393	5.35559	5.38179	5.50441	5.41682	5.29383	5.40516	5.46371	5.33226	5.49473	5.57476	5.58536	5.46079	5.46723	0.058418	0.0427465	0.0353006	0.0315806	0.05132	0.0387303	0.0649328	0.0671734	0.0556373	0.0288263	0.0676939	0.0657863	0.0419512	0.0697058	0.0279545	0.0545062	0.0365422	0.0347972	0.0532767	0.0464851
axo01215-f_at	8.89217	8.92323	8.98785	9.06591	9.1029	9.29649	9.28454	9.16344	9.11789	9.10159	9.20095	9.07315	9.1493	9.11001	9.24975	9.20745	9.26971	9.12298	9.08526	9.20334	0.0242493	0.0389676	0.0266653	0.0269638	0.0185822	0.0193193	0.0117694	0.0173355	0.0315902	0.0238598	0.0239064	0.0268868	0.02442	0.0276827	0.0264671	0.0158151	0.0168216	0.0220437	0.0195639	0.0210409
axo01216-f_at	4.23967	4.36598	4.35442	4.35252	4.25641	4.25573	4.17793	4.15525	4.23964	4.21573	4.34184	4.30458	4.34075	4.31545	4.38242	4.27626	4.27608	4.29473	4.35246	4.45791	0.0336795	0.0447779	0.0401969	0.0291025	0.0363888	0.0377312	0.0386757	0.0338321	0.0346307	0.0348695	0.0284165	0.0199411	0.0262001	0.0177761	0.0350326	0.0382446	0.0392395	0.0260933	0.0494229	0.0244152
axo01217-r_at	3.13326	3.2122	3.32108	3.1987	3.14709	3.15155	3.13631	3.19238	3.13648	3.16247	3.1642	3.20189	3.17345	3.1022	3.20091	3.1903	3.185	3.22527	3.18784	3.20142	0.0464472	0.0349452	0.0682701	0.0420053	0.0483137	0.0388937	0.0455793	0.037398	0.0537271	0.0313013	0.0456841	0.0337323	0.0460869	0.0294876	0.0446847	0.0463679	0.0212277	0.0666533	0.0390079	0.0308414
axo01218-f_at	4.51474	4.60387	4.42024	4.55718	4.6015	4.56165	4.5545	4.44411	4.53081	4.63902	4.62783	4.56047	4.45688	4.56375	4.58737	4.61097	4.53458	4.51924	4.55835	4.6292	0.0323641	0.0254208	0.0351025	0.0325067	0.0517472	0.0354406	0.029582	0.020071	0.0431753	0.0511839	0.0397935	0.0405309	0.058793	0.0485113	0.0239889	0.0174308	0.0388971	0.0332783	0.0390591	0.0321906
axo01219-r_at	7.42838	7.68566	7.5259	7.76414	7.78919	7.66783	7.49943	7.40276	7.53658	7.58945	7.77988	8.04909	7.91105	8.09659	8.13651	7.65417	7.85635	8.107	8.11864	8.06001	0.0262804	0.0615821	0.0444604	0.0344249	0.049497	0.0373775	0.0405312	0.0696405	0.0729632	0.0494671	0.0328346	0.05897	0.0464408	0.0695582	0.0583006	0.0571669	0.0533145	0.0453925	0.0342494	0.0430353
axo01220-f_at	4.54779	4.25237	4.18638	4.16933	4.13712	3.95049	3.99805	3.97636	4.0612	4.00327	4.05005	3.96673	3.92349	4.07496	3.98636	4.26515	4.01464	3.93138	4.1531	4.31143	0.053772	0.0499573	0.0464798	0.0744211	0.026431	0.0329521	0.048087	0.0377048	0.0382631	0.0492253	0.0532743	0.0410616	0.0457974	0.0444182	0.0449738	0.0731694	0.0536985	0.0565805	0.0770167	0.075747
axo01221-f_at	7.09346	6.80989	6.73148	6.51534	6.07773	5.88565	5.77374	5.52063	5.50658	5.25681	5.29962	5.05602	5.37005	5.20786	5.36313	5.62406	5.34533	5.00971	5.1688	5.66366	0.0865698	0.0630874	0.0813586	0.0841793	0.0613499	0.0839873	0.0600132	0.093908	0.0701801	0.11239	0.0927902	0.110812	0.0944885	0.0929774	0.117824	0.0979725	0.0821516	0.0771637	0.0746876	0.101808
axo01223-r_at	9.61716	9.77822	10.186	10.0249	10.0354	9.73198	9.72466	9.87884	9.94117	10.1608	10.3238	10.0671	10.0222	10.0251	10.0483	10.1757	10.0687	10.0194	10.0732	10.1235	0.00912911	0.0164852	0.0170076	0.016169	0.0223598	0.0211091	0.0208148	0.012943	0.0142826	0.00971964	0.0134588	0.012907	0.0156484	0.0116131	0.0182897	0.0147537	0.0221655	0.0107663	0.0118157	0.00923053
axo01225-f_at	3.97398	4.00358	4.07963	4.10728	4.12027	4.16989	3.98669	4.10926	4.04126	4.08711	4.38107	4.15672	4.20087	4.12246	4.04867	4.23474	4.18137	4.0401	4.13078	4.11002	0.0320605	0.0400838	0.0473173	0.0495864	0.0471251	0.0307695	0.0571738	0.0346718	0.0474063	0.0417714	0.0481421	0.0478398	0.0437197	0.0336409	0.0459152	0.0444037	0.0358879	0.0252001	0.0580159	0.039876
axo01226-f_at	6.77357	6.93066	6.87636	7.08842	6.93063	7.06582	7.01584	6.99464	6.63794	6.53095	6.85211	6.41516	6.53475	6.48047	6.52094	5.74675	5.98958	6.3006	5.84847	5.91262	0.0515684	0.0631848	0.067908	0.0662808	0.0782976	0.0610234	0.0492248	0.0682875	0.085342	0.0564009	0.0605812	0.0939854	0.0905161	0.0721097	0.0802949	0.077068	0.0868711	0.0805873	0.058217	0.0858185
axo01227-f_at	4.48494	4.52893	4.53987	4.54099	4.49818	4.51012	4.51656	4.52278	4.53131	4.54253	4.55026	4.50803	4.46832	4.51907	4.515	4.46116	4.46978	4.48812	4.51332	4.4811	0.0261064	0.0334032	0.0459302	0.0297592	0.0374919	0.0392472	0.0384961	0.0404218	0.039511	0.0407012	0.0275836	0.0490013	0.0529675	0.046251	0.0332173	0.0271106	0.0245244	0.0412608	0.0435526	0.0236492
axo01228-f_at	3.25036	3.24015	3.23264	3.24733	3.21117	3.17281	3.17305	3.15781	3.1006	3.13959	3.11455	3.15422	3.17464	3.11012	3.08322	3.07904	3.15415	3.10989	3.13394	3.11144	0.0338069	0.0354763	0.0335671	0.0392582	0.0496764	0.0590827	0.0283664	0.0304157	0.0334906	0.0425649	0.0290963	0.027309	0.0447887	0.0290369	0.0339687	0.0263234	0.0361561	0.0401163	0.0292963	0.027335
axo01229-r_at	5.87592	5.75829	5.72154	5.93333	6.02454	5.89182	5.92119	5.97643	5.9261	6.02752	5.84539	5.93469	5.95795	5.94736	6.12126	5.93621	6.17075	6.12828	6.09332	6.05009	0.0417373	0.0405181	0.0214036	0.0303809	0.0183101	0.038039	0.0595781	0.0275995	0.0214821	0.0285686	0.0314577	0.0375943	0.0237789	0.0406676	0.0192743	0.032255	0.0388571	0.0182523	0.0194387	0.0377969
axo01230-r_at	3.74104	3.73913	3.78634	3.7653	3.71604	3.58813	3.59746	3.5971	3.63035	3.71253	3.68829	3.74533	3.75316	3.6598	3.61434	3.78126	3.78877	3.73329	3.71341	3.7216	0.0560422	0.0508946	0.0626091	0.0638559	0.0446597	0.0302393	0.029759	0.0533831	0.0303278	0.0562201	0.0744546	0.03484	0.0575764	0.0388049	0.0560671	0.0521727	0.0373524	0.0313826	0.0250395	0.0546355
axo01231-f_at	5.47579	5.60418	5.61716	5.61886	5.64343	5.54328	5.52135	5.60639	5.68679	5.52375	5.59163	5.61386	5.62281	5.57634	5.62449	5.59008	5.59312	5.60759	5.69222	5.58223	0.0135994	0.0324622	0.0327652	0.0412663	0.037434	0.0300916	0.034391	0.0293025	0.0292072	0.0258901	0.0359159	0.026792	0.0253305	0.0329945	0.0275785	0.0305419	0.0309146	0.0289366	0.0188747	0.033316
axo01234-f_at	10.7725	10.3488	10.2135	10.2066	10.1446	10.0468	10.1433	10.1907	10.2172	10.1829	10.269	10.2534	10.2495	10.3144	10.3166	10.3103	10.4348	10.3424	10.3475	10.3184	0.0248862	0.0173624	0.0192853	0.0166152	0.00486602	0.0184179	0.0205937	0.0226079	0.0196979	0.0169227	0.0126206	0.00967385	0.0111014	0.00778762	0.0150376	0.0156236	0.0178344	0.00792364	0.0104511	0.015059
axo01235-r_s_at	9.84863	9.73728	9.80708	9.77109	9.83328	9.54981	9.74098	9.5895	9.95539	9.96403	10.3949	10.2075	9.78681	10.4991	10.1103	9.59878	9.97168	9.77201	9.82726	9.76262	0.0512772	0.0584311	0.0417153	0.0510528	0.0454099	0.0423869	0.0493476	0.0525181	0.0661606	0.0627861	0.0479764	0.051026	0.0609325	0.0810668	0.072113	0.0546307	0.0831569	0.078198	0.0766008	0.0717708
axo01237-f_at	6.62914	6.32397	6.26425	6.09912	6.58831	6.93225	7.0901	7.26698	7.38766	7.04126	6.69955	6.74025	6.90262	6.7189	6.6603	6.40702	6.61096	6.36274	6.16408	6.21688	0.0453839	0.0838929	0.0614225	0.0718032	0.0661748	0.0586889	0.0572604	0.0784791	0.063574	0.0732552	0.0961665	0.122121	0.0598146	0.0763425	0.0386816	0.106647	0.102928	0.0805197	0.063687	0.105177
axo01238-f_at	6.19042	6.20061	6.15565	6.08446	6.13339	5.37482	5.57001	5.47706	5.49904	5.59266	5.73426	5.81492	5.80618	6.23005	6.16392	6.4443	6.3069	6.1454	6.32495	6.30393	0.0818232	0.0723837	0.0614471	0.0570958	0.0721133	0.128168	0.0746026	0.101885	0.065669	0.0630407	0.0710593	0.0682552	0.0454798	0.0694621	0.0846944	0.0719742	0.0728265	0.0836237	0.0590533	0.0860911
axo01239-f_at	9.5255	9.46064	9.5599	9.75742	9.80897	9.89784	9.94137	9.95036	9.88968	9.87803	9.9495	9.78803	9.86806	9.80699	9.84916	9.92496	9.79581	9.9393	9.88767	9.80565	0.0138347	0.0223126	0.0170147	0.0152901	0.0206907	0.00948913	0.0108127	0.0156229	0.0183618	0.0121465	0.0143	0.0099459	0.0136031	0.0118553	0.010712	0.0187449	0.0113349	0.0146109	0.0101736	0.0240996
axo01241-r_at	7.42415	7.06563	6.9686	7.47044	7.67095	7.83825	7.72915	7.71872	7.79899	7.67484	7.7261	7.69346	7.74252	7.67184	7.80766	7.70743	7.82383	7.80166	7.79775	7.68739	0.032306	0.0279641	0.0464964	0.0278842	0.0297303	0.0180647	0.0221238	0.0125093	0.0243907	0.0333792	0.0245243	0.013735	0.0303943	0.0161703	0.0184431	0.0177149	0.0299008	0.0255429	0.024883	0.0357879
axo01242-f_at	4.43711	4.70864	4.69245	4.62213	4.58357	4.67941	4.58342	4.45597	4.50814	4.50085	4.81936	4.7392	4.57067	4.62749	4.46807	4.61009	4.38593	4.50734	4.52279	4.47999	0.0394004	0.0723731	0.073817	0.0408451	0.0481019	0.074105	0.0509166	0.0325234	0.0419712	0.0374899	0.0855068	0.0589779	0.0499177	0.0573242	0.0329629	0.0543479	0.0616373	0.0324733	0.0444883	0.0481094
axo01243-r_at	4.28248	4.37702	4.05369	4.05839	4.2626	4.22934	4.17684	4.1918	4.30957	4.40004	4.17478	4.38147	4.40501	4.50944	4.54068	4.41851	4.53625	4.62914	4.50242	4.464	0.0339209	0.0914224	0.0694956	0.0629303	0.0624584	0.0419327	0.0392293	0.0469283	0.0329024	0.0466337	0.0615395	0.0614721	0.0523824	0.0501359	0.036063	0.0607432	0.0863279	0.047117	0.056223	0.0658069
axo01244-r_at	4.14679	4.02566	3.81075	3.87042	3.88058	3.88657	3.91503	3.91565	3.97864	4.07722	3.98033	3.90972	4.05056	4.17817	4.21068	4.11033	4.22531	4.21616	4.28354	4.29367	0.0612785	0.0515178	0.0622809	0.0467032	0.0426749	0.045075	0.0280051	0.0328492	0.0658755	0.0177033	0.0555208	0.0229238	0.0499581	0.0413622	0.0516544	0.0280589	0.0607393	0.0592742	0.0386688	0.052631
axo01245-r_at	4.89935	4.5105	4.42907	4.45904	4.6421	4.84592	4.88377	4.92608	5.01747	4.99702	5.01007	5.05983	5.19001	5.3924	5.29528	5.31418	5.24349	5.24465	5.26617	5.37282	0.050096	0.0710215	0.0534531	0.0708039	0.0417163	0.0355185	0.0526106	0.0466689	0.0427842	0.0543505	0.0486542	0.0295344	0.0490858	0.0422238	0.0316785	0.0395246	0.0560188	0.0226791	0.0327152	0.0405677
axo01247-f_at	3.64601	3.74116	3.74403	3.72398	3.71973	3.68059	3.74056	3.7279	3.59733	3.72712	3.6391	3.63516	3.69643	3.6559	3.75428	3.64681	3.72594	3.65691	3.7479	3.79518	0.0400152	0.0497129	0.0527379	0.0382153	0.0634254	0.0407291	0.0359301	0.0389899	0.0440505	0.0383825	0.018663	0.042049	0.0321888	0.0475036	0.0289784	0.0412035	0.0570237	0.0478159	0.0286633	0.058079
axo01248-f_at	4.18226	4.17676	4.10054	4.31947	4.232	4.55471	4.5018	4.40223	4.35632	4.38042	4.69843	4.54579	4.53167	4.39746	4.20103	4.75315	4.65999	4.51253	4.30864	4.33398	0.0673492	0.0709462	0.0686924	0.0404973	0.0722303	0.109784	0.087375	0.0791054	0.0795598	0.0828001	0.0436633	0.0441709	0.0551374	0.0324869	0.0458566	0.046588	0.0506796	0.0496477	0.0401375	0.0467625
axo01249-f_at	7.76548	7.65199	7.53792	7.39577	7.40855	7.38705	7.42328	7.50555	7.68861	7.66203	7.75068	7.78923	7.8518	8.0906	8.1204	8.29399	8.45741	8.17971	8.19552	8.15638	0.0288451	0.0166324	0.0217102	0.0231251	0.0338751	0.0220982	0.0206487	0.0198568	0.0208893	0.028717	0.0315862	0.02153	0.0370478	0.0188866	0.0213761	0.0319208	0.0149144	0.019538	0.0211914	0.012042
axo01250-f_at	5.06567	4.88479	4.78523	4.94619	4.98186	4.88982	4.9904	5.20481	5.28133	5.28644	5.19005	5.29079	5.25056	5.23278	5.30698	5.38229	5.24977	5.17267	5.23827	5.14908	0.0477002	0.0299489	0.0541064	0.0345332	0.0438218	0.049846	0.0626149	0.0355105	0.0558885	0.0535802	0.0398891	0.0541031	0.0376256	0.0475272	0.0707764	0.0409029	0.0442343	0.0320429	0.0488687	0.0189954
axo01251-f_at	9.52952	9.25845	9.08228	9.11614	9.01272	8.91355	9.02636	8.99171	8.92104	8.88365	8.85209	8.97513	8.91896	9.033	9.10839	9.0767	9.15697	9.08637	9.06451	9.02612	0.0207754	0.0272071	0.0132934	0.0173858	0.0191185	0.0144565	0.0156758	0.0206497	0.0164883	0.0216094	0.0124201	0.00923102	0.0171006	0.0189432	0.0189191	0.026727	0.0176102	0.0170342	0.0189507	0.0192098
axo01252-f_at	3.6655	3.81008	3.77281	3.72535	3.76556	3.79764	3.76647	3.67427	3.71457	3.73141	3.75709	3.75639	3.68395	3.75846	3.70634	3.72826	3.58566	3.72389	3.71938	3.73921	0.0231767	0.0346041	0.0418583	0.0455126	0.0418368	0.0597024	0.0394905	0.0385261	0.0417051	0.0537974	0.0303939	0.0449916	0.042772	0.0543394	0.0231541	0.0496818	0.04929	0.0325329	0.0488721	0.0426205
axo01253-f_at	9.85183	9.66192	9.47488	9.54258	9.41786	9.46421	9.55738	9.64081	9.52086	9.45824	9.46626	9.5774	9.59669	9.41504	9.53312	9.51315	9.49734	9.7368	9.76553	9.58825	0.0183329	0.0191953	0.024657	0.0241351	0.0236087	0.0131396	0.0184411	0.0186148	0.0130626	0.0189728	0.0175407	0.0186537	0.0173998	0.0154959	0.0145039	0.0186026	0.0219726	0.0202423	0.0134786	0.0120855
axo01254-f_at	3.70891	3.61697	3.6108	3.59929	3.52786	3.54158	3.53885	3.50508	3.61815	3.56662	3.56098	3.59785	3.5316	3.59499	3.5999	3.52869	3.62418	3.54632	3.53651	3.59976	0.0383587	0.0462508	0.0280949	0.0515571	0.0496566	0.0366224	0.0510754	0.0463976	0.0655352	0.0500394	0.0455314	0.0312642	0.0527828	0.0569718	0.0379268	0.039102	0.0432062	0.033402	0.0521022	0.0391131
axo01255-r_at	6.62541	7.08736	7.39055	6.96165	7.17107	7.04454	7.24802	7.16816	7.08481	7.34566	7.26872	7.1041	7.33248	7.28412	7.34986	7.56409	7.66368	7.26986	7.19087	7.30035	0.0372161	0.0394795	0.0331217	0.0219686	0.0203839	0.0353822	0.0335606	0.0350398	0.0318208	0.0296149	0.0515304	0.0291176	0.0239143	0.0410888	0.0317989	0.0442516	0.0314424	0.015603	0.0279381	0.0304164
axo01256-r_at	7.6568	6.66955	6.35089	6.03046	6.04816	5.55717	5.74764	5.60283	5.38311	5.39068	4.93124	4.91193	4.9255	4.96815	5.42059	5.26876	5.57782	6.34858	6.81454	7.25338	0.0885913	0.110918	0.0701192	0.0751886	0.118862	0.0687171	0.0888737	0.0467752	0.0559051	0.068695	0.0503136	0.0357043	0.0297026	0.0322228	0.0894397	0.0484976	0.0715492	0.111117	0.102604	0.0977029
axo01257-r_at	7.37782	6.92437	6.92949	6.93629	6.64259	6.80777	6.83229	6.76931	6.62244	6.56354	6.64094	6.69676	6.49161	6.43598	6.48432	6.61354	6.63396	6.66597	6.53441	6.61694	0.0520301	0.0557923	0.0461697	0.0558738	0.0529996	0.0363973	0.0267181	0.0524488	0.0774107	0.058053	0.0684082	0.0458881	0.0397099	0.047397	0.0538847	0.0573459	0.0633168	0.0325826	0.0467385	0.0714886
axo01258-r_at	3.9306	3.89617	3.96763	3.99476	4.09779	4.02704	4.0176	4.02148	3.98481	4.01197	3.92889	4.06957	3.99502	4.00579	4.02578	4.08047	4.09715	4.04177	4.0464	3.95088	0.0435142	0.0362715	0.0526434	0.0497312	0.0330964	0.0430647	0.0391933	0.040731	0.0393651	0.053642	0.03453	0.0390716	0.0454826	0.0437727	0.0360457	0.0424522	0.0609267	0.0323959	0.039894	0.0234181
axo01260-r_at	9.65363	9.36574	9.27554	9.38288	9.44105	9.40529	9.4661	9.3803	9.38302	9.45996	9.44789	9.51768	9.49522	9.54134	9.72728	9.69009	9.71618	9.72735	9.67429	9.77031	0.0136405	0.0150348	0.0136521	0.0164772	0.0160466	0.0117515	0.00689476	0.00892697	0.0172098	0.0163015	0.0181311	0.0113665	0.0100796	0.0160298	0.00795839	0.0134376	0.011175	0.0187013	0.00735174	0.0101486
axo01261-f_at	5.01947	4.82186	4.75275	4.74081	4.69239	4.79462	4.79444	4.63993	4.60254	4.6895	4.84634	4.65254	4.62329	4.6187	4.54612	4.82794	4.76169	4.79147	4.68851	4.56009	0.0851345	0.0710057	0.0803154	0.0495984	0.0457208	0.0644559	0.0715189	0.0606199	0.0498696	0.0712055	0.0516906	0.0428503	0.0343635	0.0401128	0.0537069	0.0474443	0.0479046	0.0437506	0.0399061	0.0366223
axo01262-f_at	11.165	11.0206	10.9706	10.9641	10.8664	10.7681	10.9822	10.7422	10.71	10.8191	10.8524	10.8004	10.8325	10.7848	10.7019	10.7876	10.8082	10.7296	10.8283	10.8515	0.012032	0.0134726	0.0117355	0.0161672	0.0184415	0.012331	0.0167293	0.0112665	0.0102344	0.0222721	0.0211875	0.0251572	0.025752	0.0204471	0.0169517	0.029318	0.0263427	0.0311722	0.0255834	0.0264115
axo01263-r_at	8.51094	8.13289	8.09052	8.12645	8.10433	7.70032	7.73737	7.81085	7.80414	7.85272	7.80953	7.85275	7.96058	8.0127	8.00038	8.01978	8.16085	8.06663	8.04904	8.04314	0.0427721	0.0326706	0.0409677	0.0322202	0.033308	0.030996	0.0190823	0.0152206	0.0372085	0.0253448	0.0404453	0.024461	0.0201623	0.0212336	0.0219252	0.0238315	0.0260131	0.0173165	0.0111764	0.0141008
axo01264-f_at	3.6986	3.68496	3.62131	3.66177	3.67368	3.61925	3.66427	3.64459	3.61981	3.66817	3.69734	3.64214	3.65135	3.63245	3.64279	3.64434	3.76917	3.73553	3.67354	3.75979	0.0532666	0.0431237	0.0324488	0.038495	0.0506874	0.041799	0.0274939	0.0297379	0.0440639	0.0341834	0.0296922	0.0337514	0.0607922	0.0309124	0.0324088	0.0430779	0.0504519	0.02949	0.0383589	0.0479278
axo01265-f_at	8.11857	8.1932	8.03563	7.67883	7.72727	7.73985	7.79864	7.94968	8.07322	7.94146	7.88362	7.83048	8.08344	8.28532	8.42615	8.43428	8.63677	8.33768	8.292	8.35424	0.0384793	0.0282385	0.0252382	0.0154487	0.0320361	0.0238961	0.0210443	0.0268786	0.0324166	0.0218022	0.0318032	0.0263401	0.0445679	0.0149991	0.0175277	0.0407114	0.0402361	0.0405894	0.0212688	0.0427106
axo01268-f_at	9.11945	9.09396	8.62025	8.81948	8.43191	8.03118	8.04062	7.66943	8.02606	7.87971	7.74417	7.63335	7.69692	8.01348	7.76794	7.85519	7.81447	7.84442	7.92858	7.91236	0.0679352	0.068789	0.0651539	0.0768904	0.0720485	0.0648526	0.0728625	0.0783128	0.0810418	0.0466324	0.0813433	0.0654747	0.0809454	0.0793277	0.0702462	0.0600677	0.0652428	0.0743809	0.0667418	0.0372325
axo01269-f_at	6.72238	6.89666	6.95799	7.11921	6.86585	6.67658	6.56037	6.64976	6.8538	6.8112	7.18618	7.03427	7.06056	7.16092	7.101	7.24517	7.15645	7.06364	6.9262	6.75913	0.0476882	0.0529029	0.0545324	0.0291188	0.0334634	0.0218895	0.0376818	0.027144	0.0257965	0.0239508	0.0264292	0.0193681	0.0146391	0.0245007	0.0390746	0.021859	0.0224859	0.0269422	0.027075	0.0232668
axo01270-f_at	3.82073	3.74292	3.74143	3.76584	3.73147	3.73072	3.70656	3.72712	3.79388	3.79473	3.78068	3.6701	3.71124	3.70169	3.72179	3.74377	3.72665	3.77749	3.71731	3.77351	0.0362517	0.0510616	0.0606584	0.0432309	0.0338729	0.0380677	0.0484104	0.024695	0.049582	0.0445255	0.0526832	0.0356852	0.0451207	0.0324182	0.0501678	0.0315154	0.0494748	0.034278	0.0490555	0.0412624
axo01271-f_at	6.00666	5.71962	5.53676	5.38666	5.4077	5.18543	5.37771	5.26819	5.30871	5.31895	5.33269	5.25906	5.39346	5.53581	5.38789	5.52637	5.70115	5.37943	5.59156	5.58697	0.0715687	0.0575922	0.0613136	0.0217947	0.041274	0.0370762	0.0515185	0.0666696	0.076476	0.0568059	0.0691352	0.0495346	0.0467646	0.0782536	0.0775404	0.0571647	0.0480216	0.039787	0.0320165	0.0620972
axo01272-r_at	3.26881	3.1635	3.04925	2.97209	2.97854	2.98799	3.04435	3.08266	3.0986	3.10805	3.04591	3.12662	3.15681	3.12586	3.20418	3.19204	3.31674	3.28392	3.23659	3.36216	0.0637827	0.0413458	0.049648	0.0495469	0.0386817	0.0551731	0.0406464	0.047976	0.0597486	0.0416541	0.0497028	0.0428265	0.0284958	0.0408535	0.0374357	0.0615502	0.0685263	0.0324317	0.0518159	0.0492581
axo01273-r_at	4.41983	4.26048	4.11862	4.21026	4.05408	4.19557	4.18234	4.0885	4.21032	4.28257	4.26464	4.24286	4.28306	4.27796	4.31762	4.25658	4.45681	4.3906	4.24221	4.48928	0.0434106	0.0411081	0.0423362	0.0299895	0.0366967	0.0386432	0.0471021	0.0526511	0.0449343	0.0519339	0.0313206	0.028451	0.0291714	0.0460903	0.0375028	0.0373245	0.0640086	0.0414128	0.0370415	0.0383948
axo01274-f_at	7.16	7.19901	7.06687	6.58671	6.57303	6.70364	7.04613	7.00279	7.11564	7.12475	7.15071	7.22923	7.04691	7.10835	7.3414	7.08634	7.31217	7.21227	7.34754	7.29027	0.0261879	0.025606	0.0307447	0.0240544	0.039825	0.0231955	0.0373764	0.0176812	0.0299459	0.0506895	0.0227049	0.0294491	0.0282111	0.0342811	0.033348	0.0318297	0.0200664	0.0398456	0.0329232	0.0286919
axo01275-f_at	8.54871	8.43534	8.43138	8.4338	8.41915	8.4717	8.56831	8.55075	8.50943	8.4732	8.41275	8.61039	8.54969	8.53037	8.57253	8.4324	8.61012	8.66901	8.56229	8.60769	0.0228434	0.0284035	0.0328575	0.0318331	0.0128897	0.017611	0.0192354	0.0246393	0.0203944	0.0293672	0.0110818	0.011417	0.0177731	0.0188143	0.0170466	0.0220854	0.0166503	0.0101692	0.0266999	0.0262247
axo01276-r_at	5.77813	6.02314	6.17048	6.02054	5.91307	5.72513	5.78388	5.85477	5.78166	5.53319	5.6849	5.72655	5.76572	5.61895	5.72769	5.68541	5.52827	5.7961	5.76154	5.74398	0.0517473	0.0673175	0.0521217	0.0437431	0.0413642	0.0374234	0.0338206	0.0701745	0.056227	0.0450312	0.0677749	0.0674146	0.0807422	0.0456987	0.0665613	0.0553476	0.0381494	0.0663525	0.0977839	0.0804006
axo01277-f_at	5.06832	5.10919	5.39894	5.2032	5.08096	4.94966	5.07082	5.13833	5.23679	5.21491	5.38807	5.2558	5.53842	5.4599	5.32254	5.66846	5.35587	5.41534	5.38594	5.62695	0.0319417	0.0311154	0.127202	0.0481172	0.039139	0.0437245	0.0504853	0.0563608	0.0483309	0.0403046	0.0454701	0.0319758	0.0428726	0.059474	0.0476391	0.0429772	0.0383257	0.0460772	0.0413422	0.0434694
axo01278-f_at	4.46288	4.43532	4.31497	4.31325	4.54801	4.36636	4.29418	4.31544	4.28498	4.26266	4.2872	4.38253	4.26403	4.22033	4.31739	4.27456	4.15047	4.0304	4.33017	4.27954	0.0454962	0.0481705	0.0286434	0.0477487	0.027301	0.0597848	0.0385105	0.0392128	0.0267717	0.0311745	0.034348	0.0435724	0.0624798	0.0529975	0.0354431	0.05426	0.0486109	0.0491177	0.031998	0.0442188
axo01279-f_at	10.1389	10.0082	9.94187	9.86001	9.51124	8.85702	8.53577	8.56344	8.26031	8.6894	8.25725	8.37413	8.23345	8.91992	9.12112	8.76575	9.33459	9.26863	9.51541	9.51621	0.0713931	0.0529954	0.0716967	0.0541575	0.065528	0.0698128	0.0602939	0.0507433	0.0698151	0.0588853	0.0615599	0.0431826	0.0632252	0.0480686	0.0517572	0.0692076	0.0592464	0.0512851	0.0545608	0.0843503
axo01280-f_at	8.31707	8.19378	8.13543	7.98697	7.77277	7.65468	7.60967	7.72638	7.88521	7.97301	7.92791	8.07386	8.07803	8.12707	8.21205	8.11006	8.15825	8.21649	8.31487	8.30621	0.0367934	0.0290027	0.0241322	0.0228634	0.0169914	0.0198422	0.0200703	0.0187222	0.0221931	0.0147786	0.0198365	0.0174607	0.0117833	0.0145346	0.0201685	0.0193481	0.0205087	0.0179232	0.0163359	0.0185175
axo01282-f_at	3.73224	3.70685	3.5571	3.67256	3.61224	3.56015	3.4993	3.61636	3.55619	3.58818	3.64661	3.59844	3.61132	3.58067	3.57704	3.6422	3.60149	3.54788	3.63173	3.65174	0.0552375	0.0538527	0.0299719	0.0439237	0.0360098	0.0387938	0.0307265	0.0297722	0.0353344	0.0279248	0.0356249	0.0366937	0.0397283	0.0391024	0.0303633	0.058202	0.0251465	0.0389753	0.020464	0.0526786
axo01283-f_at	6.06131	6.17783	5.99228	6.27057	6.02067	6.23464	6.20046	6.13695	6.08236	6.16692	6.379	6.34058	6.28735	6.31073	6.26323	6.45399	6.32701	6.42628	6.30272	6.31075	0.0474616	0.0304694	0.0429287	0.0458696	0.0375772	0.0217923	0.0521578	0.0486565	0.0523252	0.0384218	0.037951	0.0408508	0.0265535	0.0513555	0.0390036	0.0380628	0.0404136	0.0466904	0.0338407	0.0290278
axo01284-r_at	11.5419	11.4411	11.3001	11.2352	11.0095	10.9234	10.771	10.9762	10.8456	10.8298	10.7395	10.8807	10.9335	11.1074	11.2191	11.1556	11.3645	11.4328	11.5734	11.4025	0.0180544	0.0192919	0.0121676	0.00972598	0.0100825	0.011273	0.0169942	0.0125553	0.0163806	0.0155882	0.0151295	0.0139287	0.0149446	0.0161905	0.0144165	0.0216206	0.0159045	0.0171854	0.0152184	0.0281449
axo01285-f_at	4.44545	4.50665	4.42103	4.55251	4.54284	4.43963	4.37352	4.4158	4.42748	4.43107	4.517	4.53297	4.53057	4.37285	4.42318	4.47356	4.44633	4.38879	4.49513	4.46204	0.0548282	0.0386565	0.0432796	0.0470906	0.0411993	0.0345935	0.0308827	0.049772	0.0371387	0.0324028	0.0354729	0.038604	0.0256361	0.0425717	0.0302526	0.0477366	0.0428955	0.0389213	0.0429034	0.0690004
axo01286-r_at	6.87209	6.93455	6.88408	6.38429	5.93173	5.68352	6.26787	6.38504	6.2805	5.95867	6.09865	6.05264	6.38973	6.62303	6.68054	6.80624	6.76676	6.58206	6.78106	6.91033	0.0501752	0.0395678	0.0466139	0.0529582	0.0690878	0.0719211	0.035577	0.0771275	0.0756964	0.0638325	0.0478588	0.0522498	0.0451602	0.0389514	0.0209954	0.0711592	0.0337399	0.0465634	0.0324414	0.0443689
axo01288-f_at	8.20807	8.24827	8.60566	8.84976	9.26834	9.40499	9.12788	8.97728	9.14888	9.23546	9.20521	9.26274	9.05398	8.86986	8.86455	8.73884	8.74732	8.76683	8.53379	8.79084	0.0281832	0.0278578	0.0181844	0.026503	0.0260207	0.0271177	0.0308776	0.0313192	0.0166516	0.0408355	0.028678	0.0293397	0.0429235	0.0307707	0.0163165	0.0219773	0.018967	0.0331879	0.0228697	0.0239462
axo01289-r_at	5.00452	4.97593	4.86229	4.66078	4.71882	4.77425	4.87068	4.90864	5.0317	4.93389	5.00214	5.05766	5.22757	5.22498	5.29355	5.16453	5.26747	5.24301	5.41154	5.34537	0.0301461	0.0320549	0.0370333	0.0367857	0.0175897	0.0437715	0.0355661	0.0510659	0.0485978	0.0302876	0.0347725	0.0390697	0.0359539	0.0203013	0.0411259	0.0358821	0.0247184	0.049221	0.0328307	0.0274083
axo01290-r_at	4.46885	4.78318	4.92454	4.76308	4.70953	4.62175	4.45446	4.47381	4.4867	4.42814	4.42181	4.55211	4.5035	4.51081	4.59467	4.4606	4.53735	4.62407	4.44418	4.55922	0.0426223	0.0728426	0.0839422	0.0717112	0.0353353	0.0401151	0.0359024	0.0240263	0.0489279	0.0359232	0.0335498	0.0548	0.0425966	0.0320892	0.0350098	0.0375091	0.0587544	0.030091	0.0272802	0.0407058
axo01293-r_at	7.60301	7.68595	8.31824	8.71458	8.71497	8.61769	8.34937	8.43508	8.46683	8.73622	8.8757	8.51885	8.38982	8.4227	8.30953	8.67706	8.67095	8.52293	8.26014	8.06774	0.0191789	0.0309547	0.0381925	0.0276188	0.0200912	0.0633551	0.0851418	0.0819363	0.0492646	0.0381437	0.0339463	0.0602671	0.0529459	0.0391384	0.042121	0.0289432	0.0247329	0.0334796	0.0344205	0.0602374
axo01294-f_at	8.81788	8.47106	8.46962	8.53159	8.68405	8.71853	8.81117	8.92328	8.86068	8.93079	8.7437	8.75075	8.75909	8.65129	8.69824	8.59798	8.54782	8.85886	8.80076	8.59567	0.038442	0.0396874	0.0577182	0.0400679	0.0140174	0.0195447	0.0236458	0.0203037	0.0216125	0.0162332	0.0192003	0.0154402	0.0341004	0.0300412	0.0172857	0.0180082	0.0139534	0.0226099	0.0182704	0.0253197
axo01295-f_at	3.65428	3.79776	4.05654	3.79463	3.82915	3.74672	3.78741	3.67098	3.67282	3.91451	3.85934	3.85129	3.74086	3.75526	3.66436	3.77698	3.6446	3.7258	3.8881	3.77149	0.0419396	0.0284378	0.071902	0.0549161	0.0384028	0.0656004	0.0454621	0.0336815	0.0324607	0.0614989	0.0667149	0.0905293	0.0682127	0.052798	0.0359815	0.0631801	0.0416534	0.030274	0.094257	0.0519615
axo01296-f_at	3.54248	3.58584	3.61404	3.62537	3.5249	3.56879	3.50245	3.55657	3.48997	3.5009	3.56141	3.53911	3.47907	3.49958	3.55663	3.45653	3.42381	3.48747	3.58481	3.55326	0.0295559	0.0552375	0.0504001	0.0321264	0.0300162	0.0354277	0.0313592	0.0221378	0.0276285	0.0411823	0.0374277	0.0294437	0.0322232	0.0424298	0.0576563	0.0507831	0.0612921	0.0434436	0.0401678	0.0736483
axo01297-f_at	6.72416	6.73872	6.98549	6.603	6.73223	6.71126	6.99078	7.41874	7.68119	7.60608	7.76113	7.69078	7.70193	7.96128	7.93667	8.0591	7.98734	7.84163	7.9436	7.73618	0.0789441	0.093012	0.101014	0.112965	0.0461666	0.0492067	0.0630449	0.0366274	0.0194348	0.0319774	0.0246477	0.0357938	0.0261974	0.0173002	0.0298455	0.0345696	0.0258472	0.0111094	0.0219912	0.0187828
axo01300-r_at	4.15383	4.28846	4.41438	4.40444	4.33959	4.32399	4.29122	4.31218	4.34085	4.36162	4.40771	4.39351	4.31073	4.3455	4.35417	4.39846	4.32446	4.2522	4.31719	4.36673	0.0355626	0.0463455	0.0363026	0.0299801	0.0399952	0.0245738	0.0243056	0.0386052	0.0369406	0.0407129	0.048025	0.0384903	0.0271947	0.0370929	0.0290218	0.0275817	0.0341614	0.0315305	0.0381598	0.0331516
axo01302-f_at	4.48926	4.67566	4.67725	4.33501	4.69814	3.955	4.17533	3.89584	4.04223	4.22348	4.16388	4.061	4.15245	4.30957	4.21979	4.44837	4.5911	4.26579	4.16907	4.35843	0.107108	0.0761137	0.0976111	0.0845293	0.1089	0.0630708	0.0542033	0.0593274	0.0645114	0.0736228	0.0453068	0.0536542	0.0638064	0.0746522	0.0470184	0.0327383	0.0790092	0.0942837	0.0693126	0.0477424
axo01304-r_at	3.65751	3.71981	3.56912	3.74388	3.63718	3.66353	3.64715	3.65477	3.69068	3.70697	3.73931	3.7549	3.8883	3.88924	3.85032	3.8717	3.83861	3.82769	3.8426	3.75645	0.0374987	0.0507471	0.0273239	0.0657672	0.0345397	0.0375673	0.0328522	0.0440811	0.0416216	0.0320582	0.0406628	0.0299254	0.0315865	0.0515569	0.042119	0.0281454	0.0446505	0.0425064	0.0535709	0.0351479
axo01305-r_at	10.1646	10.1198	10.1126	10.0854	10.1744	10.3923	10.4032	10.5618	10.6574	10.6912	10.7212	10.7562	10.8822	10.9757	10.9295	11.1221	11.1583	11.1285	11.0714	11.0673	0.0206342	0.0213553	0.0260867	0.024925	0.0234733	0.0172564	0.0132296	0.0109952	0.0154908	0.0199004	0.019097	0.0140186	0.0184689	0.010499	0.00811598	0.0123594	0.00846915	0.00813655	0.0126671	0.0139454
axo01306-f_at	4.92229	4.78798	4.78783	4.89839	4.83405	4.74034	4.65845	4.64501	4.68643	4.68129	4.81202	4.74504	4.68579	4.70974	4.70513	4.73313	4.65377	4.71905	4.7015	4.65353	0.0513615	0.0534048	0.0511198	0.0420874	0.0407648	0.0381936	0.0338901	0.0327311	0.031539	0.0538841	0.0388334	0.0428417	0.0396367	0.0367808	0.0496374	0.0361929	0.0308401	0.0589588	0.0565814	0.0381885
axo01307-f_at	4.77509	4.51302	4.46774	4.49502	4.62511	4.55966	4.51732	4.57933	4.57053	4.52256	4.40881	4.45995	4.56433	4.54638	4.59235	4.47243	4.68043	4.42509	4.39507	4.4754	0.0713479	0.0307997	0.03607	0.0463619	0.061173	0.0394383	0.0328567	0.0367778	0.0499701	0.0256682	0.0436536	0.0316757	0.0380554	0.0603379	0.0500299	0.0384885	0.0570918	0.0393912	0.031671	0.0349968
axo01308-r_at	9.28549	9.11604	9.38813	9.28081	9.53324	9.46974	9.44014	9.45864	9.4943	9.53209	9.61687	9.54949	9.51836	9.66869	9.58538	9.66433	9.53186	9.54087	9.64491	9.6905	0.0225312	0.0378004	0.016488	0.0308643	0.0233495	0.0186303	0.0084698	0.0125699	0.014904	0.0183325	0.0101121	0.0217022	0.0217556	0.0120224	0.0148886	0.0141519	0.021575	0.0140814	0.0108788	0.0143785
axo01309-f_at	4.50503	4.50395	4.36422	4.59233	4.50217	4.51103	4.53531	4.43562	4.40346	4.37334	4.48338	4.57043	4.51916	4.46644	4.4419	4.44642	4.38161	4.35152	4.35058	4.36365	0.0381	0.0305822	0.0504979	0.0396262	0.0228681	0.0660666	0.0517561	0.0356106	0.052297	0.0454104	0.0327215	0.0400796	0.042214	0.0308914	0.036432	0.0309212	0.0488951	0.0539112	0.0500813	0.0400762
axo01310-f_at	3.324	3.4193	3.30799	3.50994	3.35801	3.39515	3.38467	3.422	3.36856	3.40294	3.39356	3.43433	3.36424	3.38106	3.29235	3.41997	3.33159	3.31901	3.40394	3.389	0.0398857	0.040166	0.0427621	0.0441843	0.0351484	0.0386131	0.0312305	0.0456459	0.0553355	0.0442852	0.0227861	0.0308201	0.0664753	0.0341173	0.0365452	0.0424815	0.0299303	0.0524484	0.0435821	0.0358378
axo01311-f_at	4.04465	4.18076	4.06314	4.11347	4.03786	4.42605	4.50573	4.49771	4.35289	4.41455	4.57238	4.46258	4.38969	4.42787	4.23962	4.46143	4.36286	4.48131	4.30805	4.2207	0.0832114	0.079329	0.0768404	0.023126	0.076609	0.0965311	0.0649213	0.0618212	0.0847224	0.039291	0.0640014	0.0731893	0.0575641	0.0646771	0.0487856	0.10717	0.0903155	0.0831138	0.0543176	0.0519527
axo01312-r_at	4.82392	4.95296	5.6852	5.32619	5.12003	4.60497	4.84151	4.64627	4.61777	4.59912	4.82221	4.56492	4.5888	4.63822	4.5828	4.48596	4.47989	4.56117	4.48947	4.57527	0.0607039	0.0586587	0.0963274	0.059662	0.0770794	0.0424464	0.0513241	0.0580248	0.0530431	0.0653061	0.0511721	0.0770247	0.059521	0.0756998	0.0532817	0.0541354	0.0308445	0.0525713	0.0707143	0.0425489
axo01313-f_at	11.0523	11.0961	11.3373	11.5021	11.4726	11.483	11.2935	11.3439	11.235	11.1882	11.4016	11.3305	11.1789	11.5394	11.3489	11.6585	11.3447	11.5166	11.6967	11.74	0.0346448	0.0193896	0.0154801	0.0138018	0.0141505	0.0209756	0.0332697	0.0258121	0.0312561	0.0287351	0.0293077	0.0363067	0.0277353	0.0232345	0.0250522	0.0244741	0.0383163	0.0197164	0.0253488	0.0223158
axo01314-f_at	7.43446	7.38546	7.71131	7.74376	7.73855	7.79604	7.87206	7.95492	8.03752	8.07671	7.98284	8.00104	7.99464	7.95857	7.95251	7.91099	7.97005	7.96033	7.98582	8.0208	0.0300405	0.0420351	0.0370213	0.0228117	0.022891	0.0287736	0.033956	0.0175971	0.0209984	0.0175554	0.0329197	0.0165495	0.0215793	0.0121212	0.0170327	0.0153457	0.0274208	0.0165313	0.0252175	0.0137154
axo01315-f_at	11.4468	11.2786	11.4383	11.4453	11.6346	11.6565	11.653	11.6584	11.7252	11.6378	11.6046	11.4921	11.7817	11.7782	11.7165	11.7922	11.6075	11.6853	11.8431	11.892	0.0638449	0.0685476	0.0298937	0.0282985	0.0197818	0.0311489	0.028218	0.0244811	0.0222296	0.0301848	0.0291433	0.0276959	0.0182432	0.026185	0.0268474	0.0290608	0.0797773	0.0672328	0.0216862	0.0175608
axo01316-r_at	9.28885	8.92795	8.69471	8.65622	8.664	8.2627	8.1657	8.10197	8.13602	8.06228	8.16158	8.03216	8.12516	8.05293	8.11188	8.20725	8.10486	8.15635	8.15482	8.27612	0.0270046	0.0361102	0.0329234	0.0275009	0.0249231	0.0278491	0.041695	0.0385286	0.0322138	0.0209078	0.0410188	0.0261304	0.0316174	0.0318922	0.0381275	0.031488	0.0360258	0.0191128	0.0439988	0.0273263
axo01317-f_at	3.78588	3.76644	3.68323	3.76453	3.67251	3.60925	3.73734	3.74949	3.70177	3.61825	3.66276	3.64478	3.62809	3.78928	3.62737	3.66286	3.70456	3.54928	3.57269	3.57891	0.040823	0.0472899	0.0269952	0.0436456	0.0456358	0.0478602	0.0609191	0.0443993	0.0679199	0.0516239	0.0514737	0.0295678	0.0452349	0.0651045	0.0431291	0.0618517	0.0411914	0.0328862	0.0425743	0.0665518
axo01318-f_at	6.61395	6.68887	6.79321	6.90362	6.88418	6.81807	6.87886	6.92909	6.88257	7.11844	7.10275	7.0638	7.02425	7.09463	7.05236	7.0491	6.98328	7.02915	7.15483	7.13354	0.0351451	0.0375358	0.0379428	0.0290706	0.0246627	0.0381449	0.0437644	0.0191962	0.0360656	0.0428747	0.0284919	0.0322621	0.037593	0.0255015	0.0347692	0.0348259	0.0198998	0.0207792	0.0243827	0.0352532
axo01319-f_at	9.10177	9.27544	9.02993	8.73465	8.58407	8.05057	7.98634	8.65115	8.66478	8.63358	8.74306	8.62904	8.57663	8.54706	8.54565	8.46346	8.70339	8.64183	8.49263	8.49092	0.0672285	0.0477737	0.0955533	0.0651779	0.0500055	0.0423918	0.0404794	0.025354	0.0444185	0.0413987	0.023161	0.03523	0.0352527	0.0465056	0.0221144	0.0333843	0.0431973	0.0367133	0.0327462	0.0579916
axo01320-f_at	7.16019	7.12691	7.13276	6.8846	6.63244	6.53359	6.7549	6.81154	6.9386	6.72178	6.84002	6.79148	6.89479	7.03072	6.94356	6.85808	6.87637	6.77359	6.87034	6.91506	0.0396596	0.0175966	0.0335271	0.0415389	0.0263378	0.025506	0.0221597	0.0376513	0.0280371	0.0257691	0.0340555	0.0298075	0.0276412	0.0258085	0.0253827	0.021666	0.0182443	0.0273091	0.0236505	0.0228634
axo01321-f_at	8.88309	8.47605	8.24374	8.26635	8.20049	7.88511	7.84753	7.86778	7.76701	7.86387	7.89788	7.99263	8.25383	8.49383	8.73849	8.62907	9.05586	8.89125	8.91548	8.87058	0.040924	0.0419565	0.0493828	0.0334016	0.0331526	0.0249619	0.0240772	0.021445	0.024605	0.0200097	0.0163314	0.0338461	0.0211989	0.0211416	0.0267313	0.0392472	0.0569695	0.0354767	0.0266866	0.0266729
axo01322-r_at	6.5739	7.96137	8.78689	8.5666	8.57665	8.35346	8.07542	7.99531	7.74752	7.77682	7.49702	7.13635	6.89687	6.63507	6.43107	6.29391	6.46765	6.52125	6.71834	6.7463	0.0500448	0.044644	0.0286183	0.0366992	0.0425091	0.0332551	0.0321063	0.044824	0.0430601	0.0440657	0.0598846	0.0691931	0.0631697	0.0499274	0.0346028	0.0440135	0.0683012	0.0269035	0.0404303	0.0217739
axo01323-r_at	3.83815	3.91681	3.97833	3.99578	3.94737	4.00849	3.83915	3.78678	3.73738	3.74609	3.91258	3.78445	3.69817	3.58863	3.67249	3.70763	3.73068	3.66727	3.72169	3.75505	0.0792085	0.0614737	0.0517686	0.0581633	0.0456309	0.037051	0.0345169	0.0474869	0.0340335	0.0572386	0.0493578	0.0617838	0.0418509	0.0360534	0.0451753	0.0290678	0.0335685	0.0345475	0.0208812	0.0479267
axo01324-f_at	3.37874	3.36274	3.33133	3.33183	3.2991	3.39098	3.34448	3.31381	3.39524	3.4134	3.35568	3.36496	3.36482	3.38539	3.37954	3.50647	3.45347	3.42234	3.39571	3.39693	0.0243935	0.0322949	0.0306725	0.0384667	0.0423825	0.0329319	0.0204836	0.0209635	0.0393852	0.0262522	0.0379786	0.0307599	0.0288269	0.0373186	0.0313929	0.0442333	0.0197952	0.0281461	0.0329198	0.033354
axo01325-r_at	4.15674	4.16902	4.00437	3.98013	4.16664	4.36655	4.28852	4.33509	4.24878	4.10099	4.10845	4.39012	4.48999	4.71924	5.7958	5.19111	5.47743	5.92192	5.89971	5.66047	0.096385	0.0585213	0.0568627	0.0552388	0.0360506	0.0665191	0.106004	0.0958557	0.0706021	0.0653458	0.0625324	0.0785166	0.153387	0.143789	0.246532	0.243391	0.139575	0.151326	0.127645	0.204461
axo01328-r_at	12.4898	13.2146	13.4562	13.5544	13.7253	14.0649	13.6878	13.3042	13.3695	13.3917	13.5594	13.2701	13.3288	13.2843	13.3497	13.2342	13.2732	12.9008	12.805	13.1355	0.0135957	0.0154758	0.0181617	0.0153091	0.0105179	0.0154283	0.0155975	0.0167314	0.0140871	0.0171309	0.0148216	0.0126428	0.0200249	0.0157241	0.00941913	0.0223762	0.0120022	0.0220983	0.0217403	0.0147506
axo01331-f_at	7.52893	7.4118	7.38966	7.0988	6.9716	6.76038	7.10796	7.09106	7.12964	7.0864	7.16018	7.21606	7.34687	7.3944	7.42456	7.58706	7.62346	7.3665	7.5343	7.68421	0.0268591	0.0377704	0.0302668	0.0287213	0.0399694	0.0470263	0.0360675	0.0484969	0.0436134	0.0336121	0.0383697	0.0381242	0.0333258	0.0348033	0.0203797	0.0368221	0.0354687	0.0288266	0.0316701	0.0254761
axo01334-f_at	7.94641	7.66958	7.57919	7.56697	7.33482	7.21564	7.22804	6.99272	6.9331	6.95849	7.06765	6.93639	6.79711	6.89348	7.11357	7.08209	7.0581	7.25738	7.20311	7.33174	0.0559442	0.0693176	0.0808593	0.0635925	0.0462216	0.0579666	0.0376088	0.0378694	0.0440538	0.0321334	0.0387168	0.0307636	0.0302151	0.0462139	0.0231279	0.0319102	0.0269729	0.0324102	0.0320692	0.0540845
axo01335-f_at	8.59926	8.01852	8.35926	7.62672	7.16127	7.21456	7.40612	7.59198	7.78989	8.26693	7.81765	7.90076	8.3757	7.59152	8.68074	8.38764	8.57342	8.91147	8.64571	9.09817	0.0609075	0.0627663	0.0600619	0.0666704	0.0560929	0.0602124	0.0516048	0.0821001	0.166691	0.0707871	0.0609857	0.118274	0.0653316	0.210764	0.0678219	0.175653	0.0841038	0.053906	0.0519521	0.0529766
axo01337-f_at	7.60022	7.70393	7.84341	8.29834	8.38203	7.99398	7.93814	7.93637	7.929	7.7229	7.90399	7.89333	7.81576	7.84618	7.82759	8.00946	7.78913	7.73856	7.89363	7.89636	0.0397101	0.0414275	0.0222005	0.0230144	0.0413905	0.0341241	0.0556643	0.0443133	0.0492819	0.0174316	0.0392366	0.0346858	0.0419749	0.0507211	0.0413747	0.0303225	0.0343513	0.0181187	0.0292813	0.0241623
axo01338-r_at	4.00272	4.04317	4.10504	4.21732	4.05633	4.02339	4.04088	4.03672	3.99324	4.00334	4.01513	4.0662	4.06438	4.0037	4.04234	4.01515	4.03768	4.077	4.01674	4.03923	0.0350007	0.0346545	0.0326681	0.049865	0.0265937	0.0198736	0.0294184	0.0279588	0.0246506	0.034285	0.046643	0.0294235	0.0264303	0.051159	0.040262	0.0313187	0.0488476	0.0355171	0.0453014	0.0550386
axo01339-f_at	8.90889	8.09432	7.75718	7.39977	7.54213	7.16302	7.11297	6.8189	6.44883	6.31462	6.17149	6.16092	6.15385	5.94846	5.73611	6.0188	6.07225	5.95657	5.67871	5.79781	0.0314272	0.0903137	0.0772285	0.102133	0.100949	0.0626554	0.0620301	0.0655148	0.0377041	0.0870383	0.0658434	0.0957735	0.0854597	0.101976	0.0747744	0.075347	0.0702715	0.0843352	0.0677068	0.0985759
axo01341-r_at	3.5614	3.61729	3.58434	3.64796	3.65604	3.67702	3.59497	3.61493	3.60606	3.66658	3.60816	3.5385	3.57622	3.60932	3.53757	3.49218	3.50211	3.5376	3.59822	3.50259	0.0457838	0.0314217	0.0541768	0.032797	0.0206887	0.0306437	0.0373285	0.0424056	0.0269758	0.0398766	0.0517579	0.0382101	0.0457451	0.0526914	0.0390229	0.0326365	0.0275768	0.0372284	0.033766	0.0355972
axo01342-f_at	10.3439	11.3636	11.5954	11.2333	10.8194	10.5416	10.4523	10.2769	10.1684	10.6384	10.9366	10.5104	10.4298	10.4955	10.373	10.5621	10.507	10.3334	10.2367	10.529	0.0134913	0.0174609	0.0208113	0.0160845	0.0329297	0.0323987	0.0246735	0.0336567	0.0388731	0.0207255	0.0266679	0.0253236	0.0177586	0.0377369	0.0257131	0.0366366	0.0391044	0.026922	0.0242042	0.0305583
axo01343-f_at	3.88678	4.47155	4.36488	4.32558	3.97125	4.13226	3.92901	3.82758	3.86635	3.90556	4.30433	3.94606	3.95931	3.81017	3.70954	4.10498	3.98353	3.87834	3.77172	3.74186	0.0974889	0.0996544	0.16257	0.0832551	0.0736842	0.132285	0.116958	0.080613	0.134889	0.0748404	0.0540936	0.0575671	0.0594326	0.0491051	0.0436418	0.0904083	0.106602	0.0802846	0.0567268	0.0494808
axo01345-f_at	7.75354	7.67694	7.41234	7.47668	7.17275	6.48062	6.45285	6.63656	6.84621	6.56538	6.96329	6.88643	6.83984	6.8483	6.92982	7.57653	7.16267	7.614	7.85308	8.00557	0.0640567	0.056465	0.147128	0.0563718	0.0737612	0.0841052	0.0750538	0.0810358	0.0619234	0.0614751	0.0591332	0.0694159	0.0896238	0.148412	0.109419	0.0889523	0.16321	0.0571775	0.0642608	0.0385746
axo01346-f_at	9.55165	9.4753	9.68672	9.91474	9.97844	10.1824	10.2055	10.2168	10.1915	10.1608	10.1448	10.2629	10.2704	10.2039	10.0768	10.2241	10.0625	10.3301	10.2416	10.0253	0.024471	0.0267794	0.0245716	0.0185148	0.00864784	0.00973402	0.0205598	0.0197621	0.0183232	0.0126632	0.014404	0.014853	0.0134246	0.0193012	0.0145574	0.0163685	0.0184187	0.0138725	0.0148204	0.019423
axo01347-r_at	9.56508	9.52624	9.32436	9.07198	8.89503	9.06264	8.57344	8.3247	8.53125	8.52271	8.51421	8.48114	8.66859	8.76103	8.57278	8.76995	9.01587	8.91297	9.18161	9.16556	0.0743854	0.0591585	0.0643878	0.0609715	0.0672678	0.0278073	0.055662	0.0578685	0.0484737	0.0676663	0.0542389	0.0451154	0.0526685	0.0418637	0.0344998	0.0355346	0.0714648	0.0604439	0.0493869	0.0723614
axo01348-r_at	10.0247	10.0964	10.2003	10.2531	10.3045	10.3884	10.3952	10.348	10.392	10.5804	10.4791	10.5265	10.6164	10.7214	10.688	10.6387	10.6057	10.688	10.6545	10.7173	0.0147526	0.0271749	0.0172296	0.0123309	0.0132386	0.0119601	0.0159959	0.0133204	0.0106802	0.00800741	0.0132569	0.0149592	0.0155488	0.0126857	0.0144114	0.0126597	0.0147566	0.00892293	0.0148856	0.0221952
axo01349-f_at	7.62622	7.52009	7.45159	7.5989	8.03283	8.06753	7.97224	7.95259	7.9204	8.07455	7.9103	7.91392	8.04281	7.99422	8.03434	7.91292	7.98408	7.93747	8.06794	8.0242	0.0190572	0.0309497	0.0365368	0.0249995	0.0158384	0.0312949	0.028953	0.0259641	0.0231851	0.0133746	0.0180086	0.0147571	0.0178279	0.0221255	0.0195979	0.0245285	0.0238677	0.02517	0.0268042	0.0271714
axo01350-r_at	7.09918	6.83466	6.59611	6.34015	6.2982	6.47093	6.57571	6.84997	6.77073	6.78913	6.50967	6.39313	6.85223	6.68297	6.61354	6.46241	6.57405	6.37238	6.48008	6.56625	0.0494612	0.0561388	0.0461588	0.0466699	0.0756929	0.0485682	0.0579761	0.0545374	0.0801052	0.0469876	0.0983205	0.096755	0.0559153	0.0707674	0.0801339	0.0917245	0.0904863	0.0618466	0.0433325	0.034418
axo01351-f_at	7.64178	9.45633	9.52695	9.12715	9.05466	8.73147	8.63508	8.74533	8.93728	8.62872	8.58133	8.72481	8.51599	8.48296	8.28703	7.92939	7.81227	8.16795	7.96989	7.8013	0.0274033	0.0409785	0.0301311	0.0497098	0.0557456	0.0478301	0.0442707	0.0351598	0.056823	0.0366809	0.038138	0.041657	0.0388655	0.0278586	0.0684156	0.0361906	0.036302	0.0331525	0.0307565	0.0370205
axo01353-r_at	3.851	3.98518	3.93858	3.8755	3.86098	3.82158	3.78772	3.79191	3.72511	3.81642	3.77128	3.75442	3.84408	3.73121	3.79791	3.83796	3.92944	3.8235	3.77771	3.80765	0.0766811	0.0535506	0.0527725	0.0647996	0.0340414	0.0222423	0.0292955	0.023996	0.0420917	0.0425509	0.0216279	0.0184312	0.0365057	0.0230061	0.0428365	0.0408962	0.0526322	0.0406985	0.0405651	0.0414505
axo01355-f_at	4.02126	4.11921	4.01208	4.05706	4.09153	3.9266	3.88965	3.9088	3.94872	3.9167	3.97769	3.92828	3.99637	3.98092	3.98219	4.07129	4.00026	3.96198	4.05263	4.14887	0.0565057	0.049814	0.0286291	0.0426433	0.050868	0.0488388	0.0375065	0.0305597	0.03372	0.0494049	0.0368289	0.0298752	0.0439354	0.0310099	0.0371287	0.0335444	0.0411853	0.0377589	0.0292505	0.0561942
axo01356-r_at	3.40908	3.30015	3.32875	3.34484	3.34411	3.41419	3.28538	3.36808	3.3279	3.29604	3.30536	3.39478	3.28179	3.36999	3.37276	3.40414	3.39071	3.37139	3.42117	3.39921	0.049414	0.0426177	0.0347557	0.0356508	0.0280849	0.0240511	0.0239814	0.0303953	0.0343027	0.0423746	0.0233618	0.0506953	0.0234141	0.0441119	0.0395728	0.0278894	0.0280826	0.0522212	0.026162	0.040922
axo01357-f_at	4.27587	4.33886	4.22175	4.34106	4.46153	4.20473	4.15225	4.1593	4.23903	4.37256	4.24224	4.38686	4.25738	4.28866	4.25043	4.41994	4.18881	4.09354	4.11767	4.2545	0.0408233	0.0366461	0.0571739	0.0917125	0.148454	0.0402177	0.052247	0.0310697	0.0361388	0.0381389	0.06292	0.0177239	0.0671019	0.06202	0.0427569	0.101159	0.0432822	0.0374585	0.0268209	0.0926382
axo01358-r_at	3.47616	3.52536	3.50205	3.47064	3.41416	3.4484	3.39458	3.37137	3.46342	3.36288	3.48852	3.52328	3.44115	3.35713	3.46106	3.4385	3.38853	3.4168	3.37188	3.4772	0.0467841	0.0480571	0.0453603	0.0267871	0.0434926	0.032282	0.0315114	0.0336873	0.0203199	0.0413626	0.0279761	0.029178	0.0265938	0.027441	0.0351772	0.0441281	0.0482338	0.037788	0.0390196	0.0484272
axo01361-f_at	3.76699	3.70439	3.57741	3.66308	3.69205	3.70043	3.71955	3.61842	3.58988	3.6678	3.76288	3.69413	3.66839	3.7171	3.54741	3.71859	3.72362	3.73293	3.73219	3.73551	0.0477426	0.0460229	0.0446824	0.024771	0.0570772	0.0300807	0.038832	0.0354456	0.0466474	0.0483193	0.0539761	0.0514368	0.0407777	0.0582711	0.0474917	0.0442398	0.0315383	0.0483164	0.0280963	0.046228
axo01362-f_at	4.67307	4.64053	4.73233	4.64927	4.72729	4.74823	4.79548	4.78107	4.8144	4.77804	4.83392	4.91201	4.84419	4.88891	4.87762	4.90505	4.84747	4.74046	4.82504	4.79807	0.0435896	0.0397443	0.0321376	0.0270369	0.0462582	0.0282578	0.02777	0.0496553	0.0388592	0.0426771	0.0217257	0.0178711	0.0402173	0.038594	0.0221678	0.0386433	0.0519532	0.021248	0.0319824	0.0476688
axo01363-r_at	12.0573	12.1483	12.3477	12.527	12.7543	13.2251	13.2178	13.1778	13.1738	13.0599	13.0484	12.96	12.9251	12.6472	12.5587	12.5935	12.6	12.4557	12.2279	12.513	0.0181146	0.0231455	0.0187201	0.015271	0.0129683	0.0136142	0.00931394	0.0151187	0.00813388	0.011734	0.0134939	0.0155123	0.0164966	0.0120434	0.0185128	0.0315159	0.0198363	0.0235943	0.0216822	0.00762574
axo01364-f_at	6.57322	6.4744	6.2745	6.1264	6.48574	6.98418	7.23419	7.36817	7.17529	7.03293	6.96944	7.04458	7.22572	7.27506	7.37576	7.39107	7.39842	7.33178	7.42287	7.22313	0.0297251	0.0652591	0.0634708	0.0588084	0.0309519	0.0236268	0.0237487	0.024325	0.0255635	0.0245072	0.0250122	0.0172214	0.0147594	0.0167091	0.0171631	0.0250238	0.026328	0.0333188	0.0225436	0.0152347
axo01365-f_at	3.85381	3.87897	3.90011	3.79432	3.9053	3.84506	3.86643	3.88342	3.85621	3.84665	4.00118	3.91633	3.94458	3.90483	3.98594	3.92324	3.88462	3.87766	3.88912	3.85031	0.0418144	0.0387454	0.0379194	0.0393079	0.0354059	0.0386184	0.0375778	0.0385829	0.0318404	0.0309189	0.0396772	0.0351893	0.0304083	0.0330149	0.0268788	0.0330897	0.0500269	0.0436899	0.0420585	0.0447308
axo01366-f_at	9.37434	9.07142	8.91576	8.98012	9.08412	8.92151	9.03682	9.12354	9.07746	9.03453	8.95064	8.9644	9.01173	9.12097	9.1956	9.11703	9.2788	9.20272	9.11431	9.17174	0.0290298	0.0308686	0.0166778	0.0173892	0.0227683	0.0158539	0.0121741	0.0181409	0.0179574	0.0203561	0.0290192	0.0271647	0.0260869	0.0218358	0.0158662	0.0245895	0.0217648	0.0205323	0.0144052	0.0264468
axo01367-r_at	3.5862	3.52807	3.51353	3.5849	3.47273	3.50646	3.48918	3.46553	3.50056	3.53726	3.4946	3.49455	3.43817	3.5067	3.52353	3.48914	3.45921	3.49926	3.47404	3.51385	0.0463172	0.0451483	0.0253137	0.0317429	0.0250532	0.0277627	0.0291794	0.0268088	0.0483296	0.0305751	0.0461913	0.0391619	0.0313237	0.0452795	0.0184197	0.0365108	0.0240668	0.0578317	0.0419064	0.0328955
axo01368-f_at	8.97777	8.88611	8.46259	8.56942	8.57941	8.85513	8.79566	8.85446	8.9469	8.9519	9.01619	9.10244	9.16432	9.14898	9.21937	9.31656	9.44473	9.39581	9.23048	9.1578	0.0269695	0.0161507	0.0440459	0.0196501	0.0191015	0.0246457	0.026998	0.0216091	0.0218336	0.022796	0.0164173	0.0206859	0.0256215	0.0157198	0.00935062	0.0122456	0.0227296	0.0131701	0.0144061	0.0280944
axo01369-f_at	7.1585	6.91778	6.46557	6.64294	6.69076	7.2351	7.11317	7.17598	7.17397	7.14222	7.59273	7.66463	7.58724	7.40117	7.50735	7.80274	7.77213	7.70582	7.56682	7.23873	0.0550037	0.0657329	0.108113	0.049131	0.0402258	0.0641658	0.0732556	0.0724661	0.0599588	0.058932	0.0487701	0.0454722	0.0310512	0.0401456	0.035339	0.0359976	0.0572305	0.0583696	0.0261889	0.0794267
axo01370-f_at	3.93881	3.88519	3.94019	3.95288	3.94217	3.98312	3.94676	3.95945	4.00052	4.00144	4.08433	4.06592	4.13448	4.08331	4.17042	4.29789	4.18823	4.30963	4.25848	4.16979	0.0470817	0.0329668	0.0316898	0.0346667	0.0202785	0.02637	0.0238888	0.0399305	0.0501704	0.050405	0.0358764	0.0214644	0.0348063	0.0417954	0.0342631	0.0349142	0.0494428	0.0370136	0.0405003	0.0457898
axo01371-f_at	5.39762	5.20582	5.27388	5.28218	5.41558	5.24766	5.32257	5.39942	5.31996	5.54582	5.41112	5.35326	5.29933	5.31108	5.31869	5.08066	5.268	5.39724	5.21476	5.28153	0.0472884	0.0398959	0.0392691	0.049562	0.0462715	0.0419123	0.0465009	0.0334277	0.0481672	0.0444788	0.026653	0.0452296	0.0489527	0.0388644	0.0272646	0.0333651	0.0392067	0.0436249	0.0434888	0.0478202
axo01372-f_at	11.1922	11.1581	11.0983	11.1337	11.1052	11.098	11.1497	11.1492	11.1002	11.0681	11.0522	11.1001	11.2419	11.2797	11.295	11.2673	11.3082	11.2934	11.2999	11.2783	0.0171222	0.0150458	0.0127439	0.0162255	0.0188584	0.0123867	0.0130499	0.0110427	0.0101582	0.00857942	0.00990398	0.00991984	0.00698149	0.00618235	0.00882135	0.0149873	0.00953799	0.00863216	0.00728635	0.00669387
axo01373-f_at	11.1882	11.2037	11.2261	11.4594	11.2299	10.7279	10.3705	9.97206	9.93676	9.66178	9.98953	9.55197	9.46613	9.80829	9.48363	9.25996	9.4034	9.69445	9.22777	9.48394	0.0616222	0.0524003	0.0468919	0.0495695	0.0517742	0.0622974	0.0499435	0.0717148	0.0627375	0.0579727	0.0618026	0.0857435	0.0713885	0.0752007	0.0727486	0.0583734	0.0688265	0.0620285	0.0749164	0.0721562
axo01374-f_at	4.58882	4.70647	4.69279	4.79493	4.74484	4.75282	4.75298	4.67855	4.61954	4.74861	4.80561	4.83758	4.78852	4.7113	4.64354	4.87084	4.85292	4.84606	4.81642	4.84261	0.0333379	0.0277252	0.0391023	0.0338563	0.0326639	0.0413002	0.0261643	0.0315592	0.0212614	0.0324164	0.036128	0.0322262	0.049744	0.0299742	0.0218671	0.0715178	0.0547345	0.0405108	0.0337404	0.0422273
axo01375-f_at	3.34852	3.40063	3.41132	3.36566	3.26977	3.32696	3.44058	3.28312	3.35083	3.33974	3.31689	3.3963	3.35655	3.39992	3.41556	3.30739	3.30413	3.24045	3.34004	3.28366	0.0229122	0.028665	0.0343236	0.0191757	0.0226787	0.0316158	0.0428795	0.0230311	0.0269032	0.0337167	0.034194	0.0372479	0.0206614	0.0443108	0.0356731	0.0370136	0.0420793	0.0362214	0.0336173	0.0416305
axo01376-f_at	8.91755	9.13108	8.89697	8.86649	8.55081	8.47355	8.52065	8.71029	8.91259	9.06039	9.11333	9.18169	9.09503	9.1733	9.27444	9.24422	9.32658	9.20968	9.31039	9.42161	0.0287428	0.0170953	0.0331592	0.0235581	0.014504	0.032082	0.0224196	0.0192899	0.0123669	0.0220313	0.0223068	0.0219406	0.014803	0.0206421	0.0182567	0.0265939	0.0215959	0.0188582	0.0213987	0.022131
axo01377-r_at	7.32309	7.28633	7.2398	7.3404	7.26525	7.47699	7.36489	7.27349	7.1835	7.21801	7.35566	7.53001	7.39395	7.50302	7.38322	7.23739	7.11619	7.42915	7.38922	7.46725	0.0758809	0.0584703	0.0505015	0.0535677	0.0734176	0.0225741	0.0347639	0.0425994	0.0496699	0.0411399	0.0541435	0.0349548	0.0267413	0.0411982	0.0169019	0.0393091	0.0415148	0.0395613	0.0383788	0.0570394
axo01378-r_at	10.7137	10.674	10.6139	11.0681	11.0283	10.3449	9.815	9.53283	9.86796	9.42022	9.69602	8.92103	8.87606	9.49389	8.58288	8.53633	8.40025	8.78788	8.36808	8.51237	0.113547	0.116725	0.10363	0.0830458	0.0647967	0.0863014	0.0707932	0.0800513	0.0781002	0.0746831	0.110209	0.113311	0.102308	0.100639	0.139708	0.127149	0.121108	0.11622	0.122663	0.0832907
axo01379-f_at	7.74262	7.67442	7.78964	7.73942	7.76811	7.82785	7.82444	7.8188	7.79559	7.89253	7.58982	7.67213	7.87301	7.8542	7.98266	7.92802	7.87677	7.83221	7.81883	7.72429	0.0414048	0.0256699	0.0381594	0.037106	0.0347291	0.0195463	0.0349697	0.0516231	0.0367968	0.0481353	0.0404122	0.0241343	0.0292397	0.0366962	0.0316501	0.02565	0.0183416	0.0436858	0.0259438	0.0338564
axo01381-f_at	7.68977	7.38881	6.99393	6.76907	6.30786	6.08418	6.31409	6.43933	6.11097	6.1682	5.88881	6.25982	6.65716	5.77591	5.8163	5.78476	5.79169	5.96311	6.61204	6.69729	0.225459	0.216955	0.200264	0.275401	0.208591	0.132319	0.0934639	0.162479	0.207765	0.095811	0.0742811	0.128405	0.131923	0.0854736	0.0659739	0.0922899	0.0657795	0.120985	0.124961	0.131137
axo01385-f_at	6.85332	6.52747	5.39986	5.69691	5.63218	5.81472	5.78487	5.33328	5.36401	5.27666	4.95348	5.0558	4.92108	5.03011	5.39277	5.57672	5.14448	5.18522	4.98438	5.44906	0.123994	0.146572	0.0697301	0.0881498	0.141092	0.105175	0.113877	0.0528651	0.0779066	0.0896296	0.029725	0.0722852	0.086309	0.0980065	0.0684255	0.0905039	0.103459	0.0850804	0.0602498	0.0938912
axo01386-f_at	4.31978	4.25139	4.276	4.31802	4.2836	4.18941	4.20278	4.26036	4.15705	4.22239	4.16043	4.146	4.16942	4.13517	4.15553	4.17435	4.17413	4.27166	4.20982	4.3557	0.0478373	0.06034	0.0519707	0.0424171	0.0373264	0.0604405	0.0466135	0.0268967	0.0299259	0.0410943	0.0243923	0.0355127	0.0398121	0.04123	0.0479151	0.0409797	0.0405578	0.039862	0.0348003	0.0368855
axo01387-f_s_at	9.95226	9.83934	9.9125	9.99171	9.99489	9.99528	10.0895	10.1567	10.1761	10.2261	10.3248	10.2797	10.2506	10.2477	10.2376	10.2924	10.3131	10.3137	10.255	10.3036	0.0168334	0.0189008	0.0210894	0.01459	0.0203374	0.00986001	0.0104437	0.0151476	0.0223944	0.0166279	0.0132202	0.0172662	0.0118608	0.0115389	0.0119619	0.0135864	0.0134162	0.0112107	0.0084357	0.0179553
axo01388-r_at	5.95912	5.96981	6.00255	5.9254	5.79314	5.8882	5.87742	5.76805	5.84712	6.03838	6.13526	6.11281	6.09802	6.1307	6.1672	6.02895	6.12845	6.06332	6.16223	6.0663	0.0284417	0.0289815	0.0288326	0.0260057	0.0359465	0.02507	0.0298686	0.0273435	0.0180262	0.0300281	0.0422569	0.024949	0.0347752	0.0162649	0.0224776	0.0238723	0.0376083	0.0415035	0.0438764	0.0386937
axo01390-r_at	5.52654	5.36152	5.33425	5.27878	5.37245	5.35185	5.43543	5.41562	5.41845	5.49851	5.45943	5.52902	5.20571	5.33317	5.27341	5.45366	5.5134	5.69352	5.53248	5.49217	0.0758291	0.0295317	0.0686375	0.0501819	0.043232	0.0411652	0.0380425	0.0233675	0.0341013	0.0526558	0.0491855	0.042044	0.0407674	0.0387674	0.0365145	0.0554588	0.0453243	0.0576794	0.045124	0.0481333
axo01391-f_at	3.82152	4.25085	4.94893	5.15949	5.2075	4.73428	4.37009	4.29481	4.29148	4.05906	4.16547	3.99254	4.14629	3.99582	3.91151	3.84591	3.90685	3.83474	3.8374	4.02531	0.0524934	0.0854362	0.119344	0.204482	0.164744	0.127495	0.147756	0.0524405	0.0619183	0.062381	0.0615956	0.0551995	0.133607	0.0242005	0.04114	0.0437594	0.056612	0.0375867	0.0286411	0.039776
axo01392-f_at	9.57303	9.87513	9.95422	9.97	9.94823	9.87307	9.81421	9.8364	9.90505	9.89759	10.09	10.0378	9.98248	10.0073	9.95531	9.84138	9.90204	9.89537	9.88516	9.91253	0.0141941	0.0125222	0.0130138	0.011719	0.0142363	0.00797327	0.0170217	0.0114056	0.0161795	0.00946539	0.0107032	0.0146274	0.0181123	0.0199243	0.0220955	0.0118118	0.0139797	0.0169319	0.0197232	0.0225474
axo01395-f_at	3.79741	3.96383	3.89395	3.86624	3.83085	3.90163	3.88284	3.79529	3.85886	3.82491	4.0199	3.76586	3.74722	3.72053	3.68686	3.70741	3.71326	3.64735	3.66839	3.68114	0.0479817	0.0445108	0.0418974	0.0264789	0.0432886	0.0314338	0.0517055	0.052707	0.047138	0.0337719	0.0336934	0.0435098	0.0400422	0.0361241	0.0434595	0.0445594	0.0437866	0.0447138	0.0492766	0.0278961
axo01396-r_at	3.53136	3.5857	3.56579	3.58522	3.53319	3.52925	3.55269	3.51463	3.54564	3.58059	3.6297	3.59647	3.57246	3.55223	3.59976	3.57965	3.53685	3.61668	3.60147	3.55959	0.0372414	0.0399832	0.0465311	0.0499699	0.0158236	0.0287215	0.0384274	0.0280757	0.0299618	0.036042	0.0408022	0.0117703	0.0335763	0.0274843	0.0310574	0.0236115	0.0323752	0.0439844	0.0638174	0.0327202
axo01397-f_at	9.95292	9.93736	9.97225	9.9917	9.96903	9.96684	9.97145	10.0132	10.0674	10.195	10.2142	10.2024	10.0728	10.1044	10.012	10.1291	9.94878	10.0719	10.2285	10.2171	0.020903	0.0150232	0.018043	0.0131942	0.0172766	0.015795	0.0133352	0.0109382	0.0106654	0.0148612	0.0224164	0.0330651	0.0175287	0.0279907	0.0164803	0.0125051	0.0262266	0.0158313	0.0146924	0.0151436
axo01398-f_at	7.33796	7.20432	7.38563	7.48401	7.45436	7.49531	7.52444	7.56068	7.65597	7.68784	7.57807	7.69713	7.75173	7.72686	7.87322	7.77464	7.78415	7.7891	7.86228	7.90272	0.0225724	0.0446447	0.0330664	0.0164325	0.0155562	0.015758	0.0232187	0.0229854	0.0160072	0.0166311	0.0182387	0.0176623	0.0203697	0.0172838	0.00714147	0.0117371	0.0234023	0.0113574	0.015073	0.0165259
axo01399-r_at	9.48831	9.46905	9.42366	9.47917	9.4817	9.55762	9.62168	9.78585	9.7894	9.74979	9.69896	9.68417	9.75096	9.71735	9.64326	9.68007	9.63545	9.60153	9.66697	9.61436	0.0082834	0.00893276	0.0174628	0.0117341	0.0117758	0.00853531	0.0158293	0.0107636	0.0133155	0.00987072	0.0159784	0.0206971	0.0130419	0.0146364	0.0151599	0.0132091	0.0117315	0.00998881	0.0123195	0.0171276
axo01400-f_at	3.62277	3.679	3.70888	3.738	3.73578	3.61276	3.61398	3.61693	3.64599	3.58613	3.62644	3.52768	3.61512	3.66527	3.65154	3.56483	3.54792	3.59054	3.54864	3.63049	0.045927	0.051445	0.036879	0.0342193	0.0481812	0.039348	0.0316634	0.0257079	0.0321267	0.0358851	0.0484578	0.0243629	0.0379539	0.0261268	0.0420165	0.0383613	0.0521796	0.0444386	0.0410194	0.0381643
axo01401-f_at	5.34522	5.41447	5.32627	5.35146	5.43649	5.56582	5.70322	5.89124	5.79579	5.69439	5.81038	5.70681	5.87767	5.96192	5.96059	5.96813	5.94371	6.11273	6.09942	5.97866	0.0286014	0.041521	0.0477918	0.034661	0.0222954	0.040449	0.0308808	0.0317631	0.0285567	0.0347704	0.0263051	0.0309041	0.0182436	0.023648	0.0331548	0.0269236	0.0213022	0.0155398	0.02736	0.0345955
axo01403-f_at	4.24732	5.06939	5.4873	5.02684	4.74398	4.69461	4.75964	4.75415	4.80852	4.78447	4.80654	4.94123	4.69263	4.85287	4.98006	4.87068	4.87502	5.16913	4.94874	4.86727	0.0678015	0.0717141	0.119439	0.0454983	0.0864633	0.0539429	0.0513672	0.0539585	0.0408156	0.0538943	0.05733	0.0300693	0.027467	0.0385888	0.0359118	0.0482687	0.0480467	0.0610452	0.0454372	0.0724857
axo01404-r_at	9.33636	8.94886	8.78085	9.07078	9.00846	8.68671	8.83687	9.26494	9.19339	9.2729	9.05637	9.18052	8.95682	8.92855	8.96231	8.81358	8.9314	9.11465	9.12396	9.05307	0.0159559	0.0174339	0.0324513	0.0209018	0.0311648	0.0290332	0.0297394	0.0312927	0.0287933	0.0261357	0.0300055	0.0304918	0.0291649	0.0251509	0.0151814	0.0291841	0.0298222	0.029766	0.0258691	0.0197116
axo01405-f_s_at	11.2257	10.3391	9.80503	9.56324	9.22032	9.30491	9.37163	8.93746	8.43565	6.83128	5.779	5.61707	5.21318	4.41368	4.17782	4.4857	4.19435	4.11487	4.04911	4.37914	0.0232528	0.0853817	0.0896713	0.112495	0.0896163	0.0724121	0.0745883	0.116274	0.12081	0.264807	0.236506	0.312621	0.270474	0.0845821	0.0919919	0.08511	0.0629337	0.0540063	0.0522157	0.0602619
axo01406-r_at	13.2001	13.1012	13.0662	13.0484	13.0562	13.0411	13.0859	13.1212	13.1279	13.0997	13.0308	13.0596	13.0976	13.1637	13.2121	13.2558	13.2753	13.2254	13.2139	13.1746	0.00507058	0.00637283	0.00229405	0.00534543	0.00650263	0.00259613	0.00389616	0.00259484	0.00596103	0.00392041	0.00553675	0.00457778	0.00636846	0.00512112	0.00406199	0.00445009	0.00392465	0.00346965	0.00384038	0.00336393
axo01408-f_at	3.98383	4.05001	4.10422	4.02862	4.11464	4.06725	4.04173	3.99599	4.03321	4.06901	4.17248	4.07028	4.10634	4.05545	4.16924	4.06102	4.05418	4.10721	4.09306	4.14273	0.0293622	0.0496916	0.0408247	0.0401105	0.0374285	0.0435849	0.024278	0.0272131	0.0401724	0.0380938	0.0275259	0.0316806	0.0384016	0.0295037	0.0325401	0.0418175	0.0222156	0.0375227	0.0439413	0.0258085
axo01409-f_at	7.37183	7.06172	6.98899	6.78735	6.69264	6.86159	7.14653	7.35559	7.34553	7.48778	7.33006	7.46507	7.52177	7.34594	7.40913	7.3674	7.43289	7.49271	7.41738	7.21881	0.0305014	0.0262659	0.0545302	0.041512	0.0231036	0.0377797	0.0307149	0.0371563	0.02617	0.0317742	0.0276843	0.011685	0.0286493	0.0320819	0.0218007	0.0255131	0.0301502	0.0155573	0.0325253	0.0439835
axo01410-r_at	7.6462	6.98521	7.54835	7.58152	7.65702	7.36505	7.47849	7.47558	7.28966	7.37775	7.23823	7.52534	7.46132	7.47995	7.54903	7.35758	7.62357	7.70634	7.56454	7.41341	0.0500046	0.0431669	0.0168117	0.0303842	0.0209244	0.0278851	0.0205396	0.0105185	0.0281964	0.0301142	0.0320103	0.02818	0.0284261	0.0311164	0.0178747	0.025404	0.0267032	0.0266946	0.0144195	0.0182148
axo01411-f_at	7.95879	7.92044	7.95131	7.99057	7.91406	7.8742	7.83117	7.95889	8.07131	8.09683	8.14751	8.22368	8.19547	8.22986	8.23905	8.25529	8.18999	8.27732	8.22656	8.36248	0.0256852	0.0134645	0.0195778	0.018802	0.0224213	0.0128723	0.0231984	0.0150873	0.0214383	0.0130365	0.0116211	0.0183176	0.0115638	0.0252652	0.0145882	0.0184775	0.0221105	0.0162536	0.0115716	0.0131328
axo01412-f_at	7.96239	7.68841	7.34562	7.28557	7.38367	7.62258	7.86921	7.83264	7.80102	8.03072	7.89008	7.98622	8.12565	8.0865	8.10593	8.07227	8.08764	8.0314	8.01581	8.05549	0.0295192	0.0192815	0.0190548	0.0388678	0.0311833	0.0403079	0.0419376	0.0444472	0.0259965	0.0271779	0.0200971	0.0151909	0.0345944	0.0245582	0.0170731	0.0235202	0.0301364	0.0208879	0.0195919	0.0261035
axo01413-r_at	7.76896	7.26743	7.33196	7.30834	7.468	7.42994	7.46347	7.49067	7.46124	7.41232	7.34835	7.28364	7.43257	7.29203	7.43718	7.42558	7.60268	7.49287	7.33618	7.27188	0.0286629	0.0292119	0.0313769	0.0325691	0.0273481	0.0272069	0.0315368	0.0274636	0.0294421	0.0454719	0.0288961	0.0367985	0.0232609	0.0444207	0.0492075	0.0255522	0.0302613	0.0312359	0.0222493	0.0256368
axo01414-f_at	3.79548	3.63454	3.73389	3.67001	3.71405	3.80504	3.7766	3.70844	3.7664	3.81485	3.76643	3.90498	3.76128	3.96379	3.9865	3.91749	3.98417	4.00033	3.97731	3.93441	0.0472111	0.0490985	0.0424379	0.0300742	0.0448608	0.020039	0.0398472	0.0469128	0.0492843	0.0622178	0.0326408	0.0422294	0.0613095	0.0465956	0.0580705	0.0488707	0.0617295	0.0505334	0.0435142	0.036135
axo01416-f_at	3.57153	3.64268	3.48813	3.64566	3.55753	3.68376	3.58734	3.58171	3.58767	3.57719	3.56909	3.5866	3.53196	3.56123	3.47705	3.57688	3.52926	3.53524	3.52858	3.59604	0.0547565	0.035192	0.0328235	0.0323275	0.0535373	0.0489502	0.0351254	0.0345603	0.0349982	0.043686	0.0416159	0.0512378	0.0479544	0.0474302	0.0399253	0.041402	0.0405126	0.0465728	0.0286179	0.0553844
axo01417-r_at	4.34598	4.16887	4.21551	4.45713	4.28239	4.45973	4.32576	4.43585	4.55618	4.46717	4.40513	4.60104	4.13375	4.37712	4.52321	4.55724	4.28714	4.66059	4.40304	4.32439	0.110354	0.0453799	0.0520858	0.060364	0.0286184	0.0501911	0.0820218	0.088418	0.0598452	0.0598488	0.0833605	0.0842767	0.0647722	0.0655681	0.0780477	0.0898516	0.0681252	0.117975	0.0734015	0.0726784
axo01418-f_at	5.27713	5.44955	5.33236	5.36486	5.41111	5.24482	5.16003	5.19768	5.14937	5.15375	5.35169	5.24293	5.24591	5.23786	5.26688	5.33069	5.10946	5.04897	5.26374	5.18279	0.0349886	0.0482905	0.0506647	0.052746	0.0492604	0.0296957	0.0345915	0.0275176	0.0408623	0.0464188	0.0376772	0.0446246	0.0378108	0.0392214	0.0254594	0.0361741	0.0473809	0.0334778	0.0330395	0.0548831
axo01419-r_at	4.55399	4.65714	4.97621	4.69556	4.58501	4.40879	4.32431	4.35332	4.32925	4.31167	4.39935	4.32623	4.45576	4.31434	4.2977	4.19772	4.29061	4.30943	4.25141	4.18531	0.0933855	0.0690407	0.170776	0.0366495	0.0304726	0.0514345	0.0274039	0.0279846	0.0305791	0.049714	0.0604476	0.0677238	0.0841814	0.0706176	0.0428881	0.0436574	0.0352341	0.0504694	0.0521384	0.0541993
axo01420-r_at	9.40384	9.37716	9.38356	9.44716	9.42615	9.44733	9.44889	9.48151	9.4451	9.55324	9.67721	9.69913	9.65783	9.6957	9.59751	9.60452	9.60983	9.71303	9.76588	9.81408	0.014458	0.0248622	0.0261915	0.0149826	0.011737	0.0122697	0.0151776	0.0191723	0.0151331	0.017821	0.0166948	0.0236031	0.0139128	0.0153717	0.00997543	0.0253761	0.0258415	0.0196628	0.00918371	0.00935752
axo01421-f_at	6.16554	7.92744	8.54473	8.6847	8.33522	8.35122	7.89941	7.81213	7.88456	8.15157	7.73125	7.91451	8.02969	8.01475	7.90505	7.59747	7.33648	7.36281	7.09556	7.15514	0.0706926	0.0573014	0.0600249	0.0637699	0.039172	0.0499632	0.0582797	0.0484128	0.0430675	0.0550841	0.0526099	0.0689885	0.0727154	0.0536939	0.0504884	0.0454695	0.0483745	0.056157	0.0527355	0.114005
axo01422-f_at	5.47063	5.49742	5.70181	5.79901	5.81569	5.81389	5.77601	5.74532	5.7808	5.85736	5.89615	5.91305	5.84047	5.83814	5.80675	5.9552	5.8222	5.97031	5.79414	5.83089	0.0382165	0.0190083	0.0211276	0.0375698	0.0422181	0.0261504	0.0277477	0.0275601	0.0214881	0.0227923	0.033065	0.0425361	0.0222706	0.0293747	0.0243081	0.0562697	0.0476189	0.0214772	0.0327572	0.0290697
axo01423-r_at	9.05397	9.31751	9.89855	10.0212	10.1612	10.2347	10.202	10.0937	10.0033	10.3855	10.1841	10.3901	10.2889	10.2481	10.5948	10.2621	10.5728	10.526	10.3012	10.3734	0.0551947	0.0469293	0.0388684	0.0137345	0.0189519	0.0311596	0.0347954	0.0307914	0.0290475	0.0185944	0.0424987	0.0349258	0.0299995	0.0434221	0.0281779	0.0386675	0.0248506	0.0238583	0.0192408	0.0397213
axo01424-f_at	4.76485	4.95695	4.90618	4.77518	4.74719	4.91867	5.22079	5.48346	5.37076	5.19723	5.16862	5.21368	5.41889	5.45278	5.45935	5.33442	5.28311	5.7332	5.67692	5.45022	0.0285023	0.0749313	0.0678309	0.0746036	0.0788317	0.0427785	0.0954723	0.0583229	0.0642247	0.0699895	0.0757691	0.0355366	0.0940521	0.0397909	0.0735849	0.0556143	0.0784174	0.0468562	0.041007	0.0847111
axo01426-f_at	3.66002	3.5507	3.58873	3.6994	3.59494	3.85373	3.71251	3.8438	3.73298	3.65424	3.5794	3.9004	3.76373	3.7595	3.74524	3.91328	3.96379	3.90713	3.87103	3.70125	0.0541602	0.0637983	0.0407088	0.0560801	0.0601491	0.0411939	0.0422539	0.0589803	0.0665987	0.0510624	0.056579	0.0694834	0.0523961	0.0678968	0.0551442	0.0696776	0.0514467	0.0453929	0.0538693	0.035171
[truncated: 19,010 more rows]
