# Supplementary material for: Transcriptome dynamics along axolotl regenerative development are consistent with an extensive reduction in gene expression heterogeneity in dedifferentiated cells
Source: PeerJ. 2017 Nov 6;5:e4004. doi: 10.7717/peerj.4004 (PMC5678507; doi:10.7717/peerj.4004)
Supplement: Table S4 — See Main text and Fig. S2 for further details on each Monte Carlo-Wilcoxon matched-pairs signed-ranks test (MCW) design. PCAUC was calculated as the sum of simulated cvGEBIs with the closets value to observed cvGEBIs for the corresponding timepoint and all precedent ones divided by the sum of observed cvGEBIs for the corresponding timepoint and all precedent ones for unrestricted, timepoint-restricted and expression-restricted MCW tests. [file peerj-05-4004-s006.xlsx]

## Sheet: Table S4
Table S4. Contribution of chance, variation in gene expression level, and factors acting on the transcriptome as a whole to gene expression heterogeneity dynamics along axolotl forearm regenerative development.
		Proportional cumulative area under the curve [PCAUC]
Timepoint	Days after amputation	Unrestricted MCW tests	Timepoint-restricted MCW tests	Expression-restricted MCW tests (2 decimals)	Expression-restricted MCW tests (3 decimals)
T0.5	0.5	0.219883	0.5039	0.30468	0.24339
T1	1	0.215361	0.546248	0.278168	0.230027
T1.5	1.5	0.26809	0.532004	0.271525	0.221585
T2	2	0.261053	0.538542	0.269838	0.228461
T3	3	0.232059	0.562575	0.2345	0.189575
T4	4	0.207624	0.573334	0.211051	0.190812
T5	5	0.192338	0.577748	0.198061	0.181626
T7	7	0.192753	0.585029	0.200383	0.179726
T9	9	0.194591	0.586629	0.201837	0.187786
T10	10	0.190654	0.587692	0.195304	0.18517
T12	12	0.18435	0.588588	0.190245	0.177696
T14	14	0.180847	0.593349	0.188996	0.173958
T16	16	0.178378	0.59909	0.189189	0.171672
T18	18	0.161256	0.604957	0.175598	0.160844
T20	20	0.168846	0.604046	0.186186	0.170056
T22	22	0.171564	0.60687	0.192758	0.173687
T24	24	0.166071	0.60789	0.191121	0.171123
T26	26	0.155308	0.607009	0.180364	0.163431
T28	28	0.156511	0.606852	0.180551	0.161965
Notes
See Main text and Figure S2 for further details on each Monte Carlo-Wilcoxon matched-pairs signed-ranks test (MCW) design. PCAUC was calculated as the sum of simulated cvGEBIs with the closets value to observed cvGEBIs for the corresponding timepoint and all precedent ones divided by the sum of observed cvGEBIs for the corresponding timepoint and all precedent ones for unrestricted, timepoint-res…
