# Supplementary material for: Transcriptome dynamics along axolotl regenerative development are consistent with an extensive reduction in gene expression heterogeneity in dedifferentiated cells
Source: PeerJ. 2017 Nov 6;5:e4004. doi: 10.7717/peerj.4004 (PMC5678507; doi:10.7717/peerj.4004)
Supplement: Table S5 — Probesets in Voss et al. dataset were prioritized upon their transcript abundance CV difference between 1 and 1.5 post-amputation timepoints, and randomly rearrange 10 times. GOrilla and REVIGO were used to perform gene ontology (GO) enrichment analyses on prioritized and random lists. The GO term enrichment found using random lists supported by the largest number of genes was used as threshold to narrow down observed GO enrichments with potential biological significance. See Materials and Methods for further details. [file peerj-05-4004-s007.xlsx]

## Sheet: Table S5
Table S5. Gene Ontology (GO) enrichments for genes prioratized with regard to their change in gene expression heterogeneity between 1 and 1.5 days after axolotl forarm amputation, and randomly rearranged.
List of genes	GO Term	Description	P-value	Enrichment	N	B	n	b	Genes
Prioratized	GO:1903047	mitotic cell cycle process	0.000139	1.54	11090	638	1050	93	[SEPT7 - septin 7, KLHL42 - kelch-like family member 42, CDK5RAP2 - cdk5 regulatory subunit associated protein 2, CHAMP1 - chromosome alignment maintaining phosphoprotein 1, PAPD5 - pap associated domain containing 5, GSPT1 - g1 to s phase transition 1, ORC4 - origin recognition complex, subunit 4, CD2AP - cd2-associated protein, SPDL1 - spindle apparatus coiled-coil protein 1, MUS81 - mus81 stru…
Prioratized	GO:0006325	chromatin organization	0.000245	1.61	11090	459	1080	72	[ZMYND8 - zinc finger, mynd-type containing 8, SMARCAD1 - swi/snf-related, matrix-associated actin-dependent regulator of chromatin, subfamily a, containing dead/h box 1, VPS72 - vacuolar protein sorting 72 homolog (s. cerevisiae), GSG2 - germ cell associated 2 (haspin), ARID5B - at rich interactive domain 5b (mrf1-like), TLK1 - tousled-like kinase 1, BAHD1 - bromo adjacent homology domain contai…
Prioratized	GO:0016569	covalent chromatin modification	0.000159	1.77	11090	357	967	55	[ZMYND8 - zinc finger, mynd-type containing 8, SMARCAD1 - swi/snf-related, matrix-associated actin-dependent regulator of chromatin, subfamily a, containing dead/h box 1, VPS72 - vacuolar protein sorting 72 homolog (s. cerevisiae), ARID5B - at rich interactive domain 5b (mrf1-like), GSG2 - germ cell associated 2 (haspin), TLK1 - tousled-like kinase 1, BAHD1 - bromo adjacent homology domain contai…
Random	GO:0023052	signaling	0.000882	1.67	11090	329	1072	53	[CHRND - cholinergic receptor, nicotinic, delta (muscle), PCDH15 - protocadherin-related 15, KCNMB3 - potassium large conductance calcium-activated channel, subfamily m beta member 3, TJP1 - tight junction protein 1, TAC1 - tachykinin, precursor 1, SLC9A1 - solute carrier family 9, subfamily a (nhe1, cation proton antiporter 1), member 1, CHRNA4 - cholinergic receptor, nicotinic, alpha 4 (neurona…
Random	GO:0007155	cell adhesion	0.000521	1.74	11090	538	616	52	[DST - dystonin, NCAM2 - neural cell adhesion molecule 2, SVEP1 - sushi, von willebrand factor type a, egf and pentraxin domain containing 1, TNFRSF12A - tumor necrosis factor receptor superfamily, member 12a, ANTXR1 - anthrax toxin receptor 1, CDH3 - cadherin 3, type 1, p-cadherin (placental), COL6A6 - collagen, type vi, alpha 6, PTPRK - protein tyrosine phosphatase, receptor type, k, ATP1B1 - a…
Random	GO:0022610	biological adhesion	0.00063	1.73	11090	542	616	52	[DST - dystonin, NCAM2 - neural cell adhesion molecule 2, SVEP1 - sushi, von willebrand factor type a, egf and pentraxin domain containing 1, TNFRSF12A - tumor necrosis factor receptor superfamily, member 12a, ANTXR1 - anthrax toxin receptor 1, CDH3 - cadherin 3, type 1, p-cadherin (placental), COL6A6 - collagen, type vi, alpha 6, PTPRK - protein tyrosine phosphatase, receptor type, k, ATP1B1 - a…
Prioratized	GO:0070646	protein modification by small protein removal	0.000317	1.84	11090	230	1124	43	[PSMD12 - proteasome (prosome, macropain) 26s subunit, non-atpase, 12, PSMD11 - proteasome (prosome, macropain) 26s subunit, non-atpase, 11, PSMD13 - proteasome (prosome, macropain) 26s subunit, non-atpase, 13, TAF10 - taf10 rna polymerase ii, tata box binding protein (tbp)-associated factor, 30kda, USP32 - ubiquitin specific peptidase 32, IKBKG - inhibitor of kappa light polypeptide gene enhance…
Random	GO:0043254	regulation of protein complex assembly	0.000908	1.9	11090	263	801	36	[GFAP - glial fibrillary acidic protein, FHOD3 - formin homology 2 domain containing 3, IQGAP2 - iq motif containing gtpase activating protein 2, ERCC3 - excision repair cross-complementing rodent repair deficiency, complementation group 3, TAF1 - taf1 rna polymerase ii, tata box binding protein (tbp)-associated factor, 250kda, NCK2 - nck adaptor protein 2, TRAF3IP1 - tnf receptor-associated fact…
Random	GO:0002768	immune response-regulating cell surface receptor signaling pathway	0.00079	1.97	11090	199	905	32	[NCKAP1 - nck-associated protein 1, CARD11 - caspase recruitment domain family, member 11, RELA - v-rel avian reticuloendotheliosis viral oncogene homolog a, PDPK1 - 3-phosphoinositide dependent protein kinase-1, MALT1 - mucosa associated lymphoid tissue lymphoma translocation gene 1, IGLL1 - immunoglobulin lambda-like polypeptide 1, PPP3R1 - protein phosphatase 3, regulatory subunit b, alpha, HR…
Random	GO:0002429	immune response-activating cell surface receptor signaling pathway	0.000403	2.06	11090	184	905	31	[NCKAP1 - nck-associated protein 1, CARD11 - caspase recruitment domain family, member 11, RELA - v-rel avian reticuloendotheliosis viral oncogene homolog a, PDPK1 - 3-phosphoinositide dependent protein kinase-1, MALT1 - mucosa associated lymphoid tissue lymphoma translocation gene 1, IGLL1 - immunoglobulin lambda-like polypeptide 1, HRAS - harvey rat sarcoma viral oncogene homolog, ARPC3 - actin…
Random	GO:0007600	sensory perception	0.000721	2.13	11090	233	626	28	[BTBD9 - btb (poz) domain containing 9, CNGA3 - cyclic nucleotide gated channel alpha 3, PCDH15 - protocadherin-related 15, TECTA - tectorin alpha, PDE6D - phosphodiesterase 6d, cgmp-specific, rod, delta, KIFC3 - kinesin family member c3, CDH3 - cadherin 3, type 1, p-cadherin (placental), CHRNA4 - cholinergic receptor, nicotinic, alpha 4 (neuronal), GPX1 - glutathione peroxidase 1, SPTBN4 - spect…
Prioratized	GO:0002758	innate immune response-activating signal transduction	0.000196	2.25	11090	154	897	28	[MUC5B - mucin 5b, oligomeric mucus/gel-forming, PSMD12 - proteasome (prosome, macropain) 26s subunit, non-atpase, 12, PSMD11 - proteasome (prosome, macropain) 26s subunit, non-atpase, 11, PSMD13 - proteasome (prosome, macropain) 26s subunit, non-atpase, 13, ITCH - itchy e3 ubiquitin protein ligase, SYK - spleen tyrosine kinase, UNC93B1 - unc-93 homolog b1 (c. elegans), RPS6KA3 - ribosomal protei…
Prioratized	GO:0002218	activation of innate immune response	0.000259	2.2	11090	157	897	28	[MUC5B - mucin 5b, oligomeric mucus/gel-forming, PSMD12 - proteasome (prosome, macropain) 26s subunit, non-atpase, 12, PSMD11 - proteasome (prosome, macropain) 26s subunit, non-atpase, 11, PSMD13 - proteasome (prosome, macropain) 26s subunit, non-atpase, 13, ITCH - itchy e3 ubiquitin protein ligase, SYK - spleen tyrosine kinase, UNC93B1 - unc-93 homolog b1 (c. elegans), RPS6KA3 - ribosomal protei…
Random	GO:0008360	regulation of cell shape	0.000138	2.45	11090	108	1088	26	[FN1 - fibronectin 1, TPM1 - tropomyosin 1 (alpha), MYH10 - myosin, heavy chain 10, non-muscle, FMNL1 - formin-like 1, C21orf2 - chromosome 21 open reading frame 2, KDR - kinase insert domain receptor (a type iii receptor tyrosine kinase), CSNK1G1 - casein kinase 1, gamma 1, PRPF40A - prp40 pre-mrna processing factor 40 homolog a (s. cerevisiae), RDX - radixin, SH3KBP1 - sh3-domain kinase binding…
Random	GO:0030198	extracellular matrix organization	0.000224	2.41	11090	197	585	25	[A2M - alpha-2-macroglobulin, ADAMTS3 - adam metallopeptidase with thrombospondin type 1 motif, 3, FLOT1 - flotillin 1, ITGA9 - integrin, alpha 9, JAM2 - junctional adhesion molecule 2, ITGAD - integrin, alpha d, MFAP5 - microfibrillar associated protein 5, KAZALD1 - kazal-type serine peptidase inhibitor domain 1, ITGA3 - integrin, alpha 3 (antigen cd49c, alpha 3 subunit of vla-3 receptor), COL1A…
Random	GO:0043062	extracellular structure organization	0.000224	2.41	11090	197	585	25	[A2M - alpha-2-macroglobulin, FLOT1 - flotillin 1, ADAMTS3 - adam metallopeptidase with thrombospondin type 1 motif, 3, ITGA9 - integrin, alpha 9, JAM2 - junctional adhesion molecule 2, ITGAD - integrin, alpha d, MFAP5 - microfibrillar associated protein 5, KAZALD1 - kazal-type serine peptidase inhibitor domain 1, ITGA3 - integrin, alpha 3 (antigen cd49c, alpha 3 subunit of vla-3 receptor), COL1A…
Random	GO:0090068	positive regulation of cell cycle process	0.000922	2.17	11090	175	731	25	[RANBP2 - ran binding protein 2, FGFR1 - fibroblast growth factor receptor 1, RQCD1 - rcd1 required for cell differentiation1 homolog (s. pombe), SIN3A - sin3 transcription regulator family member a, CTGF - connective tissue growth factor, TP53 - tumor protein p53, ZNF16 - zinc finger protein 16, ATM - ataxia telangiectasia mutated, CNOT11 - ccr4-not transcription complex, subunit 11, SVIL - supe…
Random	GO:0018205	peptidyl-lysine modification	0.000774	2.28	11090	229	510	24	[HCFC1 - host cell factor c1 (vp16-accessory protein), SP3 - sp3 transcription factor, PRDM2 - pr domain containing 2, with znf domain, HAT1 - histone acetyltransferase 1, SMYD3 - set and mynd domain containing 3, METTL21A - methyltransferase like 21a, TAF5 - taf5 rna polymerase ii, tata box binding protein (tbp)-associated factor, 100kda, ZNF451 - zinc finger protein 451, POR - p450 (cytochrome)…
Random	GO:0051052	regulation of DNA metabolic process	0.000792	2.41	11090	292	347	22	[PCNA - proliferating cell nuclear antigen, UBR5 - ubiquitin protein ligase e3 component n-recognin 5, DHX36 - deah (asp-glu-ala-his) box polypeptide 36, TGFB1 - transforming growth factor, beta 1, DNMT1 - dna (cytosine-5-)-methyltransferase 1, BRCA2 - breast cancer 2, early onset, BRCA1 - breast cancer 1, early onset, FBXW7 - f-box and wd repeat domain containing 7, e3 ubiquitin protein ligase, …
Prioratized	GO:0002223	stimulatory C-type lectin receptor signaling pathway	8.28e-05	2.88	11090	90	897	21	[PSMD12 - proteasome (prosome, macropain) 26s subunit, non-atpase, 12, MUC5B - mucin 5b, oligomeric mucus/gel-forming, PSMB3 - proteasome (prosome, macropain) subunit, beta type, 3, MUC2 - mucin 2, oligomeric mucus/gel-forming, PSMD11 - proteasome (prosome, macropain) 26s subunit, non-atpase, 11, MUC4 - mucin 4, cell surface associated, PSMD13 - proteasome (prosome, macropain) 26s subunit, non-at…
Prioratized	GO:0002220	innate immune response activating cell surface receptor signaling pathway	9.71e-05	2.85	11090	91	897	21	[MUC5B - mucin 5b, oligomeric mucus/gel-forming, PSMD12 - proteasome (prosome, macropain) 26s subunit, non-atpase, 12, PSMB3 - proteasome (prosome, macropain) subunit, beta type, 3, MUC2 - mucin 2, oligomeric mucus/gel-forming, PSMD11 - proteasome (prosome, macropain) 26s subunit, non-atpase, 11, MUC4 - mucin 4, cell surface associated, PSMD13 - proteasome (prosome, macropain) 26s subunit, non-at…
Prioratized	GO:0008380	RNA splicing	0.000366	2.63	11090	315	281	21	[SMNDC1 - survival motor neuron domain containing 1, SPEN - spen homolog, transcriptional regulator (drosophila), ZCCHC8 - zinc finger, cchc domain containing 8, CDC5L - cell division cycle 5-like, DDX1 - dead (asp-glu-ala-asp) box helicase 1, SRPK1 - srsf protein kinase 1, RNPC3 - rna-binding region (rnp1, rrm) containing 3, RBM5 - rna binding motif protein 5, RBM25 - rna binding motif protein 2…
Prioratized	GO:0070085	glycosylation	0.000579	2.7	11090	177	417	18	[MUC5B - mucin 5b, oligomeric mucus/gel-forming, DPM1 - dolichyl-phosphate mannosyltransferase polypeptide 1, catalytic subunit, COG6 - component of oligomeric golgi complex 6, UBE2J1 - ubiquitin-conjugating enzyme e2, j1, TRAK2 - trafficking protein, kinesin binding 2, GALNT3 - udp-n-acetyl-alpha-d-galactosamine:polypeptide n-acetylgalactosaminyltransferase 3 (galnac-t3), TET2 - tet methylcytosi…
Prioratized	GO:0007017	microtubule-based process	1.31e-08	5.8	11090	405	85	18	[C6orf165 - chromosome 6 open reading frame 165, TEKT2 - tektin 2 (testicular), KIF9 - kinesin family member 9, RSPH9 - radial spoke head 9 homolog (chlamydomonas), TUBA1A - tubulin, alpha 1a, DNAH11 - dynein, axonemal, heavy chain 11, SYNE2 - spectrin repeat containing, nuclear envelope 2, DNAI2 - dynein, axonemal, intermediate chain 2, KIF3A - kinesin family member 3a, RSPH4A - radial spoke hea…
Random	GO:0030968	endoplasmic reticulum unfolded protein response	0.000324	3.16	11090	79	710	16	[MBTPS1 - membrane-bound transcription factor peptidase, site 1, EDEM1 - er degradation enhancer, mannosidase alpha-like 1, SRPR - signal recognition particle receptor (docking protein), CXXC1 - cxxc finger protein 1, SEC61B - sec61 beta subunit, EIF2S1 - eukaryotic translation initiation factor 2, subunit 1 alpha, 35kda, CALR - calreticulin, TLN1 - talin 1, ERO1L - ero1-like (s. cerevisiae), HER…
Random	GO:0090305	nucleic acid phosphodiester bond hydrolysis	0.000121	3.41	11090	215	242	16	[ANG - angiogenin, ribonuclease, rnase a family, 5, PCNA - proliferating cell nuclear antigen, EXOSC9 - exosome component 9, NCBP1 - nuclear cap binding protein subunit 1, 80kda, ERCC5 - excision repair cross-complementing rodent repair deficiency, complementation group 5, DCPS - decapping enzyme, scavenger, ZRANB3 - zinc finger, ran-binding domain containing 3, SND1 - staphylococcal nuclease and…
Random	GO:0009888	tissue development	0.000994	2.99	11090	337	165	15	[PLOD1 - procollagen-lysine, 2-oxoglutarate 5-dioxygenase 1, TUFT1 - tuftelin 1, STAT5B - signal transducer and activator of transcription 5b, RBBP6 - retinoblastoma binding protein 6, ERG - v-ets avian erythroblastosis virus e26 oncogene homolog, SLC25A25 - solute carrier family 25 (mitochondrial carrier; phosphate carrier), member 25, SOX17 - sry (sex determining region y)-box 17, NRG1 - neureg…
Prioratized	GO:0007018	microtubule-based movement	1.87e-08	8.79	11090	193	85	13	[TEKT2 - tektin 2 (testicular), C6orf165 - chromosome 6 open reading frame 165, KIF9 - kinesin family member 9, RSPH9 - radial spoke head 9 homolog (chlamydomonas), DNAH11 - dynein, axonemal, heavy chain 11, SYNE2 - spectrin repeat containing, nuclear envelope 2, DNAI2 - dynein, axonemal, intermediate chain 2, KIF3A - kinesin family member 3a, RSPH4A - radial spoke head 4 homolog a (chlamydomonas…
Random	GO:0034109	homotypic cell-cell adhesion	0.000832	3.35	11090	36	1104	12	[PTPN6 - protein tyrosine phosphatase, non-receptor type 6, TLN1 - talin 1, DSG2 - desmoglein 2, CXADR - coxsackie virus and adenovirus receptor, SLC7A11 - solute carrier family 7 (anionic amino acid transporter light chain, xc- system), member 11, CSRP1 - cysteine and glycine-rich protein 1, MYL9 - myosin, light chain 9, regulatory, VCL - vinculin, GNAS - gnas complex locus, RAP2B - rap2b, membe…
Prioratized	GO:0030031	cell projection assembly	3.74e-05	5.41	11090	221	102	11	[C6orf165 - chromosome 6 open reading frame 165, TEKT2 - tektin 2 (testicular), IQUB - iq motif and ubiquitin domain containing, ROCK1 - rho-associated, coiled-coil containing protein kinase 1, DNAI2 - dynein, axonemal, intermediate chain 2, CCDC11 - coiled-coil domain containing 11, RSPH4A - radial spoke head 4 homolog a (chlamydomonas), KIF3A - kinesin family member 3a, CCDC176 - coiled-coil do…
Random	GO:0070849	response to epidermal growth factor	0.000877	3.6	11090	35	969	11	[CAD - carbamoyl-phosphate synthetase 2, aspartate transcarbamylase, and dihydroorotase, MCM7 - minichromosome maintenance complex component 7, GSTP1 - glutathione s-transferase pi 1, PTPN12 - protein tyrosine phosphatase, non-receptor type 12, ZFP36L2 - zfp36 ring finger protein-like 2, MAPK3 - mitogen-activated protein kinase 3, BAG4 - bcl2-associated athanogene 4, NCL - nucleolin, EEF1A1 - euk…
Random	GO:0010498	proteasomal protein catabolic process	0.000351	4.26	11090	245	117	11	[PSMD12 - proteasome (prosome, macropain) 26s subunit, non-atpase, 12, TP53 - tumor protein p53, DDB1 - damage-specific dna binding protein 1, 127kda, UBE2H - ubiquitin-conjugating enzyme e2h, CUL3 - cullin 3, ERLEC1 - endoplasmic reticulum lectin 1, UCHL1 - ubiquitin carboxyl-terminal esterase l1 (ubiquitin thiolesterase), BTBD1 - btb (poz) domain containing 1, ENC1 - ectodermal-neural cortex 1 …
Random	GO:0045646	regulation of erythrocyte differentiation	0.000795	3.57	11090	31	1102	11	[ID2 - inhibitor of dna binding 2, dominant negative helix-loop-helix protein, CDK6 - cyclin-dependent kinase 6, ZNF16 - zinc finger protein 16, ZFP36L1 - zfp36 ring finger protein-like 1, KDM1A - lysine (k)-specific demethylase 1a, INPP5D - inositol polyphosphate-5-phosphatase, 145kda, FOXO3 - forkhead box o3, HSPA9 - heat shock 70kda protein 9 (mortalin), HIF1A - hypoxia inducible factor 1, alp…
Random	GO:0051260	protein homooligomerization	0.000861	4.07	11090	183	149	10	[STOM - stomatin, CHMP2A - charged multivesicular body protein 2a, C9 - complement component 9, KCNC1 - potassium voltage-gated channel, shaw-related subfamily, member 1, HM13 - histocompatibility (minor) 13, SHMT1 - serine hydroxymethyltransferase 1 (soluble), APAF1 - apoptotic peptidase activating factor 1, DPYS - dihydropyrimidinase, KCTD12 - potassium channel tetramerization domain containing…
Random	GO:0042990	regulation of transcription factor import into nucleus	0.000223	5.02	11090	60	368	10	[MBTPS1 - membrane-bound transcription factor peptidase, site 1, FAF1 - fas (tnfrsf6) associated factor 1, TLR7 - toll-like receptor 7, DMAP1 - dna methyltransferase 1 associated protein 1, RAB23 - rab23, member ras oncogene family, PRDX1 - peroxiredoxin 1, LITAF - lipopolysaccharide-induced tnf factor, PSMD10 - proteasome (prosome, macropain) 26s subunit, non-atpase, 10, SLC9A1 - solute carrier …
Prioratized	GO:0003341	cilium movement	2.93e-11	34.95	11090	34	84	9	[DNAH11 - dynein, axonemal, heavy chain 11, TEKT2 - tektin 2 (testicular), C6orf165 - chromosome 6 open reading frame 165, DNAI2 - dynein, axonemal, intermediate chain 2, CCDC11 - coiled-coil domain containing 11, RSPH4A - radial spoke head 4 homolog a (chlamydomonas), RSPH9 - radial spoke head 9 homolog (chlamydomonas), DNAH7 - dynein, axonemal, heavy chain 7, DNAI1 - dynein, axonemal, intermedi…
Prioratized	GO:0070268	cornification	0.000705	5.43	11090	43	380	8	[KRT5 - keratin 5, PKP4 - plakophilin 4, DSG2 - desmoglein 2, DSP - desmoplakin, EVPL - envoplakin, KRT12 - keratin 12, PPL - periplakin, DSC3 - desmocollin 3]
Prioratized	GO:0044782	cilium organization	8.77e-05	7.04	11090	150	84	8	[TEKT2 - tektin 2 (testicular), IQUB - iq motif and ubiquitin domain containing, C2orf62 - chromosome 2 open reading frame 62, DNAI2 - dynein, axonemal, intermediate chain 2, KIF3A - kinesin family member 3a, CCDC11 - coiled-coil domain containing 11, CCDC176 - coiled-coil domain containing 176, RSPH9 - radial spoke head 9 homolog (chlamydomonas)]
Random	GO:1903035	negative regulation of response to wounding	0.000257	6.27	11090	42	337	8	[PLAUR - plasminogen activator, urokinase receptor, ANXA2 - annexin a2, FGA - fibrinogen alpha chain, VTN - vitronectin, KLKB1 - kallikrein b, plasma (fletcher factor) 1, PTPRS - protein tyrosine phosphatase, receptor type, s, PROS1 - protein s (alpha), CD109 - cd109 molecule]
Random	GO:0030193	regulation of blood coagulation	0.000695	5.48	11090	48	337	8	[TC2N - tandem c2 domains, nuclear, PLAUR - plasminogen activator, urokinase receptor, ANXA2 - annexin a2, FGA - fibrinogen alpha chain, SYK - spleen tyrosine kinase, VTN - vitronectin, KLKB1 - kallikrein b, plasma (fletcher factor) 1, PROS1 - protein s (alpha)]
Random	GO:1900046	regulation of hemostasis	0.000695	5.48	11090	48	337	8	[TC2N - tandem c2 domains, nuclear, PLAUR - plasminogen activator, urokinase receptor, ANXA2 - annexin a2, FGA - fibrinogen alpha chain, SYK - spleen tyrosine kinase, VTN - vitronectin, KLKB1 - kallikrein b, plasma (fletcher factor) 1, PROS1 - protein s (alpha)]
Random	GO:0050818	regulation of coagulation	0.000914	5.27	11090	50	337	8	[TC2N - tandem c2 domains, nuclear, PLAUR - plasminogen activator, urokinase receptor, ANXA2 - annexin a2, FGA - fibrinogen alpha chain, SYK - spleen tyrosine kinase, VTN - vitronectin, PROS1 - protein s (alpha), KLKB1 - kallikrein b, plasma (fletcher factor) 1]
Prioratized	GO:0060271	cilium assembly	0.000407	6.55	11090	141	84	7	[TEKT2 - tektin 2 (testicular), IQUB - iq motif and ubiquitin domain containing, DNAI2 - dynein, axonemal, intermediate chain 2, KIF3A - kinesin family member 3a, CCDC11 - coiled-coil domain containing 11, CCDC176 - coiled-coil domain containing 176, RSPH9 - radial spoke head 9 homolog (chlamydomonas)]
Random	GO:0042755	eating behavior	0.000519	5.84	11090	18	739	7	[P2RY1 - purinergic receptor p2y, g-protein coupled, 1, RMI1 - recq mediated genome instability 1, ADORA2A - adenosine a2a receptor, UCHL1 - ubiquitin carboxyl-terminal esterase l1 (ubiquitin thiolesterase), TH - tyrosine hydroxylase, ATP8A2 - atpase, aminophospholipid transporter, class i, type 8a, member 2, CCK - cholecystokinin]
Random	GO:0018195	peptidyl-arginine modification	0.000908	5.22	11090	17	875	7	[PRMT7 - protein arginine methyltransferase 7, CARM1 - coactivator-associated arginine methyltransferase 1, PRDM4 - pr domain containing 4, PRMT8 - protein arginine methyltransferase 8, PRMT5 - protein arginine methyltransferase 5, MINA - myc induced nuclear antigen, PADI3 - peptidyl arginine deiminase, type iii]
Random	GO:0044319	wound healing, spreading of cells	0.000576	5.34	11090	14	1038	7	[ITGA5 - integrin, alpha 5 (fibronectin receptor, alpha polypeptide), RHOA - ras homolog family member a, FLNA - filamin a, alpha, ARHGAP35 - rho gtpase activating protein 35, TOR1A - torsin family 1, member a (torsin a), TMEFF2 - transmembrane protein with egf-like and two follistatin-like domains 2, COL5A1 - collagen, type v, alpha 1]
Random	GO:0061045	negative regulation of wound healing	0.000448	6.78	11090	34	337	7	[PLAUR - plasminogen activator, urokinase receptor, ANXA2 - annexin a2, FGA - fibrinogen alpha chain, VTN - vitronectin, KLKB1 - kallikrein b, plasma (fletcher factor) 1, PROS1 - protein s (alpha), CD109 - cd109 molecule]
Random	GO:0051052	regulation of DNA metabolic process	0.000874	6.04	11090	292	44	7	[PARM1 - prostate androgen-regulated mucin-like protein 1, ANKRD17 - ankyrin repeat domain 17, DSCC1 - dna replication and sister chromatid cohesion 1, APLF - aprataxin and pnkp like factor, SMG5 - smg5 nonsense mediated mrna decay factor, C12orf5 - chromosome 12 open reading frame 5, UHRF2 - ubiquitin-like with phd and ring finger domains 2, e3 ubiquitin protein ligase]
Random	GO:0042157	lipoprotein metabolic process	0.000581	7.91	11090	29	290	6	[APOM - apolipoprotein m, PRKACB - protein kinase, camp-dependent, catalytic, beta, ATM - ataxia telangiectasia mutated, LPL - lipoprotein lipase, MBTPS2 - membrane-bound transcription factor peptidase, site 2, VLDLR - very low density lipoprotein receptor]
Random	GO:0001944	vasculature development	0.000931	6.5	11090	17	602	6	[ID1 - inhibitor of dna binding 1, dominant negative helix-loop-helix protein, OSR1 - odd-skipped related 1 (drosophila), ACVR2B - activin a receptor, type iib, BMPR2 - bone morphogenetic protein receptor, type ii (serine/threonine kinase), RIC8A - ric8 guanine nucleotide exchange factor a, PDGFRA - platelet-derived growth factor receptor, alpha polypeptide]
Random	GO:0001822	kidney development	0.000473	9.11	11090	83	88	6	[BCL2L11 - bcl2-like 11 (apoptosis facilitator), CENPF - centromere protein f, 350/400kda, HPGD - hydroxyprostaglandin dehydrogenase 15-(nad), TFAP2B - transcription factor ap-2 beta (activating enhancer binding protein 2 beta), FGF8 - fibroblast growth factor 8 (androgen-induced), TMED10 - transmembrane emp24-like trafficking protein 10 (yeast)]
Random	GO:0031060	regulation of histone methylation	0.000362	9.16	11090	46	158	6	[NELFE - negative elongation factor complex member e, OGT - o-linked n-acetylglucosamine (glcnac) transferase, DNMT1 - dna (cytosine-5-)-methyltransferase 1, ATRX - alpha thalassemia/mental retardation syndrome x-linked, BRCA1 - breast cancer 1, early onset, KDM4A - lysine (k)-specific demethylase 4a]
Random	GO:0030195	negative regulation of blood coagulation	0.000317	8.58	11090	23	337	6	[PLAUR - plasminogen activator, urokinase receptor, ANXA2 - annexin a2, FGA - fibrinogen alpha chain, VTN - vitronectin, KLKB1 - kallikrein b, plasma (fletcher factor) 1, PROS1 - protein s (alpha)]
Random	GO:1900047	negative regulation of hemostasis	0.000317	8.58	11090	23	337	6	[PLAUR - plasminogen activator, urokinase receptor, ANXA2 - annexin a2, FGA - fibrinogen alpha chain, VTN - vitronectin, KLKB1 - kallikrein b, plasma (fletcher factor) 1, PROS1 - protein s (alpha)]
Random	GO:0050819	negative regulation of coagulation	0.000405	8.23	11090	24	337	6	[PLAUR - plasminogen activator, urokinase receptor, ANXA2 - annexin a2, FGA - fibrinogen alpha chain, VTN - vitronectin, KLKB1 - kallikrein b, plasma (fletcher factor) 1, PROS1 - protein s (alpha)]
Random	GO:0042993	positive regulation of transcription factor import into nucleus	0.000472	8.22	11090	28	289	6	[TRIM28 - tripartite motif containing 28, RHOA - ras homolog family member a, FLNA - filamin a, alpha, DMAP1 - dna methyltransferase 1 associated protein 1, CDH1 - cadherin 1, type 1, e-cadherin (epithelial), SLC9A1 - solute carrier family 9, subfamily a (nhe1, cation proton antiporter 1), member 1]
Random	GO:0034377	plasma lipoprotein particle assembly	0.000199	9.78	11090	8	709	5	[PLAGL2 - pleiomorphic adenoma gene-like 2, APOM - apolipoprotein m, ACSL3 - acyl-coa synthetase long-chain family member 3, ARF1 - adp-ribosylation factor 1, APOA4 - apolipoprotein a-iv]
Random	GO:0065005	protein-lipid complex assembly	0.000818	7.82	11090	10	709	5	[PLAGL2 - pleiomorphic adenoma gene-like 2, APOM - apolipoprotein m, ACSL3 - acyl-coa synthetase long-chain family member 3, ARF1 - adp-ribosylation factor 1, APOA4 - apolipoprotein a-iv]
Random	GO:0070925	organelle assembly	0.000126	13.83	11090	334	12	5	[HDAC3 - histone deacetylase 3, PCM1 - pericentriolar material 1, BBS7 - bardet-biedl syndrome 7, GORAB - golgin, rab6-interacting, ANLN - anillin, actin binding protein]
Random	GO:0060192	negative regulation of lipase activity	0.000161	8.7	11090	6	1062	5	[ABL1 - c-abl oncogene 1, non-receptor tyrosine kinase, ANXA1 - annexin a1, SORT1 - sortilin 1, BICD1 - bicaudal d homolog 1 (drosophila), POR - p450 (cytochrome) oxidoreductase]
Random	GO:0044772	mitotic cell cycle phase transition	0.000768	9.73	11090	211	27	5	[CHMP2A - charged multivesicular body protein 2a, HAUS5 - haus augmin-like complex, subunit 5, KDM8 - lysine (k)-specific demethylase 8, RB1 - retinoblastoma 1, RPS6KB1 - ribosomal protein s6 kinase, 70kda, polypeptide 1]
Random	GO:0044770	cell cycle phase transition	0.000866	9.46	11090	217	27	5	[CHMP2A - charged multivesicular body protein 2a, HAUS5 - haus augmin-like complex, subunit 5, KDM8 - lysine (k)-specific demethylase 8, RB1 - retinoblastoma 1, RPS6KB1 - ribosomal protein s6 kinase, 70kda, polypeptide 1]
Random	GO:0034969	histone arginine methylation	0.000202	9.05	11090	7	875	5	[PRMT7 - protein arginine methyltransferase 7, CARM1 - coactivator-associated arginine methyltransferase 1, PRDM4 - pr domain containing 4, PRMT5 - protein arginine methyltransferase 5, PRMT8 - protein arginine methyltransferase 8]
Random	GO:0007156	homophilic cell adhesion via plasma membrane adhesion molecules	0.000933	10.73	11090	82	63	5	[DCHS1 - dachsous 1 (drosophila), PCDHGB4 - protocadherin gamma subfamily b, 4, CELSR1 - cadherin, egf lag seven-pass g-type receptor 1, PTPRM - protein tyrosine phosphatase, receptor type, m, CLSTN2 - calsyntenin 2]
Random	GO:0048844	artery morphogenesis	3.76e-05	19.66	11090	31	91	5	[NPRL3 - nitrogen permease regulator-like 3 (s. cerevisiae), ARID2 - at rich interactive domain 2 (arid, rfx-like), HPGD - hydroxyprostaglandin dehydrogenase 15-(nad), TFAP2B - transcription factor ap-2 beta (activating enhancer binding protein 2 beta), FGF8 - fibroblast growth factor 8 (androgen-induced)]
Random	GO:0048514	blood vessel morphogenesis	0.000391	12.44	11090	49	91	5	[NPRL3 - nitrogen permease regulator-like 3 (s. cerevisiae), ARID2 - at rich interactive domain 2 (arid, rfx-like), HPGD - hydroxyprostaglandin dehydrogenase 15-(nad), TFAP2B - transcription factor ap-2 beta (activating enhancer binding protein 2 beta), FGF8 - fibroblast growth factor 8 (androgen-induced)]
Random	GO:0031297	replication fork processing	0.000425	11.01	11090	22	229	5	[PCNA - proliferating cell nuclear antigen, BRCA2 - breast cancer 2, early onset, ATRX - alpha thalassemia/mental retardation syndrome x-linked, ZRANB3 - zinc finger, ran-binding domain containing 3, FANCM - fanconi anemia, complementation group m]
Random	GO:0005513	detection of calcium ion	0.000635	8.31	11090	10	667	5	[CASQ2 - calsequestrin 2 (cardiac muscle), CASR - calcium-sensing receptor, KCNIP2 - kv channel interacting protein 2, CALM1 - calmodulin 1 (phosphorylase kinase, delta), KCNMB4 - potassium large conductance calcium-activated channel, subfamily m, beta member 4]
Random	GO:0042730	fibrinolysis	2.9e-05	16.45	11090	10	337	5	[PLAUR - plasminogen activator, urokinase receptor, ANXA2 - annexin a2, FGA - fibrinogen alpha chain, KLKB1 - kallikrein b, plasma (fletcher factor) 1, PROS1 - protein s (alpha)]
Random	GO:0050932	regulation of pigment cell differentiation	0.000626	9.59	11090	5	925	4	[GNA11 - guanine nucleotide binding protein (g protein), alpha 11 (gq class), BLOC1S6 - biogenesis of lysosomal organelles complex-1, subunit 6, pallidin, ZEB2 - zinc finger e-box binding homeobox 2, GNAQ - guanine nucleotide binding protein (g protein), q polypeptide]
Random	GO:0007603	phototransduction, visible light	0.000202	12.9	11090	5	688	4	[ABCA4 - atp-binding cassette, sub-family a (abc1), member 4, GNA11 - guanine nucleotide binding protein (g protein), alpha 11 (gq class), PDE6C - phosphodiesterase 6c, cgmp-specific, cone, alpha prime, GNAQ - guanine nucleotide binding protein (g protein), q polypeptide]
Prioratized	GO:0006782	protoporphyrinogen IX biosynthetic process	0.000956	10.81	11090	8	513	4	[CPOX - coproporphyrinogen oxidase, UROS - uroporphyrinogen iii synthase, UROD - uroporphyrinogen decarboxylase, HMBS - hydroxymethylbilane synthase]
Prioratized	GO:0070286	axonemal dynein complex assembly	7.09e-05	27.79	11090	19	84	4	[TEKT2 - tektin 2 (testicular), DNAI2 - dynein, axonemal, intermediate chain 2, DNAH7 - dynein, axonemal, heavy chain 7, DNAI1 - dynein, axonemal, intermediate chain 1]
Random	GO:0045992	negative regulation of embryonic development	0.000594	14.99	11090	16	185	4	[TULP3 - tubby like protein 3, LFNG - lfng o-fucosylpeptide 3-beta-n-acetylglucosaminyltransferase, TRAF3IP1 - tnf receptor-associated factor 3 interacting protein 1, COL5A2 - collagen, type v, alpha 2]
Random	GO:0097178	ruffle assembly	0.000809	10.78	11090	7	588	4	[ARHGEF26 - rho guanine nucleotide exchange factor (gef) 26, INPPL1 - inositol polyphosphate phosphatase-like 1, BAG4 - bcl2-associated athanogene 4, DBNL - drebrin-like]
Random	GO:0019373	epoxygenase P450 pathway	0.000955	12.5	11090	13	273	4	[CYP2C19 - cytochrome p450, family 2, subfamily c, polypeptide 19, CYP2C8 - cytochrome p450, family 2, subfamily c, polypeptide 8, CYP1A1 - cytochrome p450, family 1, subfamily a, polypeptide 1, CYP2A13 - cytochrome p450, family 2, subfamily a, polypeptide 13]
Random	GO:0007253	cytoplasmic sequestering of NF-kappaB	0.000637	9.53	11090	5	931	4	[FAF1 - fas (tnfrsf6) associated factor 1, G3BP2 - gtpase activating protein (sh3 domain) binding protein 2, NFKBIA - nuclear factor of kappa light polypeptide gene enhancer in b-cells inhibitor, alpha, PSMD10 - proteasome (prosome, macropain) 26s subunit, non-atpase, 10]
Random	GO:1903147	negative regulation of mitophagy	0.000698	9.32	11090	5	952	4	[TSPO - translocator protein (18kda), TSC2 - tuberous sclerosis 2, CLEC16A - c-type lectin domain family 16, member a, RNF41 - ring finger protein 41]
Random	GO:0051570	regulation of histone H3-K9 methylation	5.36e-05	28.17	11090	15	105	4	[DNMT1 - dna (cytosine-5-)-methyltransferase 1, ATRX - alpha thalassemia/mental retardation syndrome x-linked, BRCA1 - breast cancer 1, early onset, KDM4A - lysine (k)-specific demethylase 4a]
Random	GO:0048536	spleen development	0.000282	18.81	11090	18	131	4	[PKN1 - protein kinase n1, POLB - polymerase (dna directed), beta, TET2 - tet methylcytosine dioxygenase 2, FADD - fas (tnfrsf6)-associated via death domain]
Random	GO:1900246	positive regulation of RIG-I signaling pathway	0.000216	30.25	11090	5	220	3	[PUM2 - pumilio homolog 2 (drosophila), PUM1 - pumilio homolog 1 (drosophila), TRIM15 - tripartite motif containing 15]
Random	GO:1905515	non-motile cilium assembly	3.03e-05	92.42	11090	30	12	3	[PCM1 - pericentriolar material 1, BBS7 - bardet-biedl syndrome 7, GORAB - golgin, rab6-interacting]
Random	GO:2000373	positive regulation of DNA topoisomerase (ATP-hydrolyzing) activity	0.00052	19.39	11090	4	429	3	[SETMAR - set domain and mariner transposase fusion gene, NCAPH - non-smc condensin i complex, subunit h, PLSCR1 - phospholipid scramblase 1]
Random	GO:2000371	regulation of DNA topoisomerase (ATP-hydrolyzing) activity	0.00052	19.39	11090	4	429	3	[NCAPH - non-smc condensin i complex, subunit h, SETMAR - set domain and mariner transposase fusion gene, PLSCR1 - phospholipid scramblase 1]
Random	GO:0072393	microtubule anchoring at microtubule organizing center	0.000973	21.33	11090	8	195	3	[NIN - ninein (gsk3b interacting protein), BBS4 - bardet-biedl syndrome 4, BICD1 - bicaudal d homolog 1 (drosophila)]
Prioratized	GO:0035441	cell migration involved in vasculogenesis	0.000286	18.86	11090	3	588	3	[SETD2 - set domain containing 2, TBX5 - t-box 5, PDGFRB - platelet-derived growth factor receptor, beta polypeptide]
Prioratized	GO:0035082	axoneme assembly	4.21e-05	76.48	11090	15	29	3	[C6orf165 - chromosome 6 open reading frame 165, RSPH4A - radial spoke head 4 homolog a (chlamydomonas), RSPH9 - radial spoke head 9 homolog (chlamydomonas)]
Prioratized	GO:0001578	microtubule bundle formation	0.000513	35.85	11090	32	29	3	[C6orf165 - chromosome 6 open reading frame 165, RSPH4A - radial spoke head 4 homolog a (chlamydomonas), RSPH9 - radial spoke head 9 homolog (chlamydomonas)]
Random	GO:0006104	succinyl-CoA metabolic process	0.000977	13.91	11090	3	797	3	[OGDH - oxoglutarate (alpha-ketoglutarate) dehydrogenase (lipoamide), SUCLA2 - succinate-coa ligase, adp-forming, beta subunit, SUCLG2 - succinate-coa ligase, gdp-forming, beta subunit]
Random	GO:0006419	alanyl-tRNA aminoacylation	0.000979	13.9	11090	3	798	3	[AARSD1 - alanyl-trna synthetase domain containing 1, AARS - alanyl-trna synthetase, AARS2 - alanyl-trna synthetase 2, mitochondrial]
Random	GO:0006003	fructose 2,6-bisphosphate metabolic process	0.00011	38.69	11090	5	172	3	[PFKFB4 - 6-phosphofructo-2-kinase/fructose-2,6-biphosphatase 4, C12orf5 - chromosome 12 open reading frame 5, PFKFB1 - 6-phosphofructo-2-kinase/fructose-2,6-biphosphatase 1]
Random	GO:0003071	renal system process involved in regulation of systemic arterial blood pressure	0.000609	27.75	11090	11	109	3	[AGTR1 - angiotensin ii receptor, type 1, PTPRO - protein tyrosine phosphatase, receptor type, o, SERPINF2 - serpin peptidase inhibitor, clade f (alpha-2 antiplasmin, pigment epithelium derived factor), member 2]
Random	GO:0006662	glycerol ether metabolic process	0.000179	39.61	11090	8	105	3	[GNPAT - glyceronephosphate o-acyltransferase, TXN - thioredoxin, AGPS - alkylglycerone phosphate synthase]
Random	GO:0018904	ether metabolic process	0.000287	35.21	11090	9	105	3	[GNPAT - glyceronephosphate o-acyltransferase, TXN - thioredoxin, AGPS - alkylglycerone phosphate synthase]
Random	GO:0097267	omega-hydroxylase P450 pathway	0.0004	24.37	11090	5	273	3	[CYP2C19 - cytochrome p450, family 2, subfamily c, polypeptide 19, CYP2C8 - cytochrome p450, family 2, subfamily c, polypeptide 8, CYP1A1 - cytochrome p450, family 1, subfamily a, polypeptide 1]
Random	GO:0010677	negative regulation of cellular carbohydrate metabolic process	0.000594	33.27	11090	25	40	3	[CLK2 - cdc-like kinase 2, MIDN - midnolin, SIK1 - salt-inducible kinase 1]
Random	GO:0045912	negative regulation of carbohydrate metabolic process	0.000864	29.71	11090	28	40	3	[CLK2 - cdc-like kinase 2, SIK1 - salt-inducible kinase 1, MIDN - midnolin]
Random	GO:0045176	apical protein localization	8.71e-06	118.82	11090	10	28	3	[CELSR1 - cadherin, egf lag seven-pass g-type receptor 1, NAPA - n-ethylmaleimide-sensitive factor attachment protein, alpha, ARF4 - adp-ribosylation factor 4]
Random	GO:0008105	asymmetric protein localization	3.95e-05	79.21	11090	15	28	3	[CELSR1 - cadherin, egf lag seven-pass g-type receptor 1, NAPA - n-ethylmaleimide-sensitive factor attachment protein, alpha, ARF4 - adp-ribosylation factor 4]
Random	GO:0043149	stress fiber assembly	9.97e-05	50.64	11090	9	73	3	[ITGB5 - integrin, beta 5, TNFAIP1 - tumor necrosis factor, alpha-induced protein 1 (endothelial), ZYX - zyxin]
Random	GO:0030038	contractile actin filament bundle assembly	9.97e-05	50.64	11090	9	73	3	[TNFAIP1 - tumor necrosis factor, alpha-induced protein 1 (endothelial), ITGB5 - integrin, beta 5, ZYX - zyxin]
Random	GO:0035909	aorta morphogenesis	0.000215	42.01	11090	12	66	3	[NPRL3 - nitrogen permease regulator-like 3 (s. cerevisiae), TFAP2B - transcription factor ap-2 beta (activating enhancer binding protein 2 beta), FGF8 - fibroblast growth factor 8 (androgen-induced)]
Random	GO:0001906	cell killing	0.000382	37.26	11090	19	47	3	[PRDX1 - peroxiredoxin 1, TUBB4B - tubulin, beta 4b class ivb, CAMP - cathelicidin antimicrobial peptide]
Random	GO:0051573	negative regulation of histone H3-K9 methylation	0.000287	35.21	11090	9	105	3	[DNMT1 - dna (cytosine-5-)-methyltransferase 1, BRCA1 - breast cancer 1, early onset, KDM4A - lysine (k)-specific demethylase 4a]
Random	GO:0045445	myoblast differentiation	0.000641	28.76	11090	13	89	3	[NRG1 - neuregulin 1, JAG1 - jagged 1, LGALS1 - lectin, galactoside-binding, soluble, 1]
Random	GO:0043112	receptor metabolic process	0.000262	48.64	11090	57	12	3	[NRG1 - neuregulin 1, SYK - spleen tyrosine kinase, SH3GLB1 - sh3-domain grb2-like endophilin b1]
Random	GO:0061034	olfactory bulb mitral cell layer development	0.000488	56.58	11090	2	196	2	[SALL1 - sal-like 1 (drosophila), OGDH - oxoglutarate (alpha-ketoglutarate) dehydrogenase (lipoamide)]
Random	GO:0048864	stem cell development	0.00016	231.04	11090	16	6	2	[SETD2 - set domain containing 2, MAPK3 - mitogen-activated protein kinase 3]
Random	GO:0006112	energy reserve metabolic process	0.000876	113.16	11090	49	4	2	[PPP1CA - protein phosphatase 1, catalytic subunit, alpha isozyme, GNAS - gnas complex locus]
Random	GO:1902908	regulation of melanosome transport	0.000498	55.73	11090	2	199	2	[CDH3 - cadherin 3, type 1, p-cadherin (placental), GPR143 - g protein-coupled receptor 143]
Random	GO:0055015	ventricular cardiac muscle cell development	0.000929	69.75	11090	6	53	2	[CCNB1 - cyclin b1, MYH10 - myosin, heavy chain 10, non-muscle]
Random	GO:2000587	negative regulation of platelet-derived growth factor receptor-beta signaling pathway	0.000452	98.58	11090	5	45	2	[PTPN12 - protein tyrosine phosphatase, non-receptor type 12, PDGFRA - platelet-derived growth factor receptor, alpha polypeptide]
Random	GO:0003072	renal control of peripheral vascular resistance involved in regulation of systemic arterial blood pressure	0.000813	67.83	11090	3	109	2	[AGTR1 - angiotensin ii receptor, type 1, SERPINF2 - serpin peptidase inhibitor, clade f (alpha-2 antiplasmin, pigment epithelium derived factor), member 2]
Random	GO:0002034	regulation of blood vessel diameter by renin-angiotensin	0.000813	67.83	11090	3	109	2	[AGTR1 - angiotensin ii receptor, type 1, SERPINF2 - serpin peptidase inhibitor, clade f (alpha-2 antiplasmin, pigment epithelium derived factor), member 2]
Random	GO:1904153	negative regulation of retrograde protein transport, ER to cytosol	0.00059	90.16	11090	6	41	2	[ERLEC1 - endoplasmic reticulum lectin 1, UBAC2 - uba domain containing 2]
Random	GO:0070862	negative regulation of protein exit from endoplasmic reticulum	0.00059	90.16	11090	6	41	2	[ERLEC1 - endoplasmic reticulum lectin 1, UBAC2 - uba domain containing 2]
Random	GO:0045721	negative regulation of gluconeogenesis	0.000856	79.21	11090	7	40	2	[CLK2 - cdc-like kinase 2, SIK1 - salt-inducible kinase 1]
Random	GO:0097070	ductus arteriosus closure	0.000203	112.02	11090	3	66	2	[HPGD - hydroxyprostaglandin dehydrogenase 15-(nad), TFAP2B - transcription factor ap-2 beta (activating enhancer binding protein 2 beta)]
Random	GO:0010225	response to UV-C	0.000815	92.42	11090	10	24	2	[ERCC5 - excision repair cross-complementing rodent repair deficiency, complementation group 5, BRCA2 - breast cancer 2, early onset]
Random	GO:0060956	endocardial cell differentiation	4.17e-05	308.06	11090	4	18	2	[NRG1 - neuregulin 1, SOX17 - sry (sex determining region y)-box 17]
Random	GO:0003348	cardiac endothelial cell differentiation	4.17e-05	308.06	11090	4	18	2	[NRG1 - neuregulin 1, SOX17 - sry (sex determining region y)-box 17]
Random	GO:0050850	positive regulation of calcium-mediated signaling	0.000429	145.92	11090	19	8	2	[NRG1 - neuregulin 1, SYK - spleen tyrosine kinase]
Random	GO:0033280	response to vitamin D	0.000419	150.88	11090	21	7	2	[TNC - tenascin c, TYR - tyrosinase]
Random	GO:0097198	histone H3-K36 trimethylation	0.000541	1848.33	11090	1	6	1	[SETD2 - set domain containing 2]
Random	GO:2000656	regulation of apolipoprotein binding	0.000451	2218	11090	1	5	1	[MAPK3 - mitogen-activated protein kinase 3]
Random	GO:2000657	negative regulation of apolipoprotein binding	0.000451	2218	11090	1	5	1	[MAPK3 - mitogen-activated protein kinase 3]
Random	GO:0045218	zonula adherens maintenance	0.000357	5545	11090	2	1	1	[KIFC3 - kinesin family member c3]
Random	GO:0045217	cell-cell junction maintenance	0.000789	3696.67	11090	3	1	1	[KIFC3 - kinesin family member c3]
Random	GO:0031106	septin ring organization	0.000631	1584.29	11090	1	7	1	[ANLN - anillin, actin binding protein]
Random	GO:0000921	septin ring assembly	0.000631	1584.29	11090	1	7	1	[ANLN - anillin, actin binding protein]
Random	GO:0040032	post-embryonic body morphogenesis	0.000361	2772.5	11090	1	4	1	[GNAS - gnas complex locus]
Random	GO:0036496	regulation of translational initiation by eIF2 alpha dephosphorylation	0.000271	3696.67	11090	1	3	1	[PPP1CA - protein phosphatase 1, catalytic subunit, alpha isozyme]
Prioratized	GO:1904158	axonemal central apparatus assembly	0.000451	2218	11090	1	5	1	[DNAJB13 - dnaj (hsp40) homolog, subfamily b, member 13]
Prioratized	GO:2001189	negative regulation of T cell activation via T cell receptor contact with antigen bound to MHC molecule on antigen presenting cell	0.000361	2772.5	11090	1	4	1	[LGALS3 - lectin, galactoside-binding, soluble, 3]
Prioratized	GO:2000521	negative regulation of immunological synapse formation	0.000361	2772.5	11090	1	4	1	[LGALS3 - lectin, galactoside-binding, soluble, 3]
Prioratized	GO:2000520	regulation of immunological synapse formation	0.000361	2772.5	11090	1	4	1	[LGALS3 - lectin, galactoside-binding, soluble, 3]
Random	GO:0098885	modification of postsynaptic actin cytoskeleton	0.000271	3696.67	11090	1	3	1	[MYH10 - myosin, heavy chain 10, non-muscle]
Random	GO:1903774	positive regulation of viral budding via host ESCRT complex	0.000789	3696.67	11090	3	1	1	[VPS4A - vacuolar protein sorting 4 homolog a (s. cerevisiae)]
Random	GO:0061738	late endosomal microautophagy	0.000789	3696.67	11090	3	1	1	[VPS4A - vacuolar protein sorting 4 homolog a (s. cerevisiae)]
Random	GO:0046167	glycerol-3-phosphate biosynthetic process	0.000451	2218	11090	1	5	1	[GK - glycerol kinase]
Random	GO:0072356	chromosome passenger complex localization to kinetochore	0.000902	1109	11090	1	10	1	[RCC2 - regulator of chromosome condensation 2]
Random	GO:0039019	pronephric nephron development	0.000721	1386.25	11090	1	8	1	[SEC61A1 - sec61 alpha 1 subunit (s. cerevisiae)]
Random	GO:0021683	cerebellar granular layer morphogenesis	0.000361	2772.5	11090	1	4	1	[SERPINE2 - serpin peptidase inhibitor, clade e (nexin, plasminogen activator inhibitor type 1), member 2]
Random	GO:0042628	mating plug formation	0.000361	2772.5	11090	1	4	1	[SERPINE2 - serpin peptidase inhibitor, clade e (nexin, plasminogen activator inhibitor type 1), member 2]
Random	GO:0044704	single-organism reproductive behavior	0.000361	2772.5	11090	1	4	1	[SERPINE2 - serpin peptidase inhibitor, clade e (nexin, plasminogen activator inhibitor type 1), member 2]
Random	GO:0061108	seminal vesicle epithelium development	0.000361	2772.5	11090	1	4	1	[SERPINE2 - serpin peptidase inhibitor, clade e (nexin, plasminogen activator inhibitor type 1), member 2]
Random	GO:0045297	post-mating behavior	0.000361	2772.5	11090	1	4	1	[SERPINE2 - serpin peptidase inhibitor, clade e (nexin, plasminogen activator inhibitor type 1), member 2]
Random	GO:0051611	regulation of serotonin uptake	0.000789	3696.67	11090	3	1	1	[GPM6B - glycoprotein m6b]
Random	GO:0051612	negative regulation of serotonin uptake	0.000789	3696.67	11090	3	1	1	[GPM6B - glycoprotein m6b]
Random	GO:0051581	negative regulation of neurotransmitter uptake	0.000789	3696.67	11090	3	1	1	[GPM6B - glycoprotein m6b]
Random	GO:0036245	cellular response to menadione	0.000714	2772.5	11090	2	2	1	[DCPS - decapping enzyme, scavenger]
Random	GO:0032752	positive regulation of interleukin-3 production	0.000271	3696.67	11090	1	3	1	[SYK - spleen tyrosine kinase]
Random	GO:0032672	regulation of interleukin-3 production	0.000271	3696.67	11090	1	3	1	[SYK - spleen tyrosine kinase]
Random	GO:0045423	regulation of granulocyte macrophage colony-stimulating factor biosynthetic process	0.000271	3696.67	11090	1	3	1	[SYK - spleen tyrosine kinase]
Random	GO:0045425	positive regulation of granulocyte macrophage colony-stimulating factor biosynthetic process	0.000271	3696.67	11090	1	3	1	[SYK - spleen tyrosine kinase]
Random	GO:0045401	positive regulation of interleukin-3 biosynthetic process	0.000271	3696.67	11090	1	3	1	[SYK - spleen tyrosine kinase]
Random	GO:0045399	regulation of interleukin-3 biosynthetic process	0.000271	3696.67	11090	1	3	1	[SYK - spleen tyrosine kinase]
Random	GO:0001820	serotonin secretion	0.000271	3696.67	11090	1	3	1	[SYK - spleen tyrosine kinase]
Random	GO:0002442	serotonin secretion involved in inflammatory response	0.000271	3696.67	11090	1	3	1	[SYK - spleen tyrosine kinase]
Random	GO:0002554	serotonin secretion by platelet	0.000271	3696.67	11090	1	3	1	[SYK - spleen tyrosine kinase]
Random	GO:0043366	beta selection	0.000271	3696.67	11090	1	3	1	[SYK - spleen tyrosine kinase]
Random	GO:0060739	mesenchymal-epithelial cell signaling involved in prostate gland development	0.00018	5545	11090	1	2	1	[TNC - tenascin c]
Random	GO:0071798	response to prostaglandin D	0.00018	5545	11090	1	2	1	[TNC - tenascin c]
Random	GO:0071799	cellular response to prostaglandin D stimulus	0.00018	5545	11090	1	2	1	[TNC - tenascin c]
Random	GO:0060447	bud outgrowth involved in lung branching	0.000714	2772.5	11090	2	2	1	[TNC - tenascin c]
Random	GO:0070476	rRNA (guanine-N7)-methylation	0.000357	5545	11090	2	1	1	[WBSCR22 - williams beuren syndrome chromosome region 22]
Notes
Probesets in Voss et al. dataset were prioritized upon their transcript abundance CV difference between 1 and 1.5 post-amputation timepoints, and randomly rearrange 10 times. GOrilla and REVIGO were used to perform gene ontology (GO) enrichment analyses on prioritized and random lists. The GO term enrichment found using random lists supported by the largest number of genes was used as threshold t…
